# Supplementary material for: Prolonged ovarian storage of mature Drosophila oocytes dramatically increases meiotic spindle instability
Source: eLife. 2019 Nov 22;8:e49455. doi: 10.7554/eLife.49455 (PMC6905857; doi:10.7554/eLife.49455)
Supplement: Supplementary file 1. [file elife-49455-supp1.xlsx]

## Sheet: Sheet1
Table S1	Translational and mRNA changes during oocyte aging.
		Ribosome profiling TPM value												mRNA-seq TPM value
Flybase ID	Gene symbol	oocyte 2day_A	oocyte 2day_B	oocyte 2day_C	oocyte 8day_A	oocyte 8day_B	oocyte 8day_C	oocyte 12day_A	oocyte 12day_B	oocyte 12day_C	embryo 0-2hr_A	embryo 0-2hr_B	embryo 0-2hr_C	oocyte 2day_A	oocyte 2day_B	oocyte 2day_C	oocyte 8day_A	oocyte 8day_B	oocyte 8day_C	oocyte 12day_A	oocyte 12day_B	oocyte 12day_C	embryo 0-2hr_A	embryo 0-2hr_B	embryo 0-2hr_C	ttest 12 vs. 2 RPFs	fold change 12/2 RPFs
FBgn0032398	CG6766	95.1727	96.2063	98.0978	30.8716	21.9507	29.6613	18.1297	20.184	14.1323	309.977	318.06	295.523	51.6902	59.0788	61.1743	63.9424	59.2015	63.207	62.8195	53.6441	52.8762	79.3182	69.9277	71.9004	2.32039e-06	0.181175
FBgn0051961	TBCC	182.833	186.56	181.546	125.587	128.592	112.108	82.3206	76.1902	74.9048	79.8553	92.4794	98.2153	58.3538	61.3544	59.0016	54.3502	59.9745	56.6594	54.7243	49.2841	50.5412	86.9729	80.8835	74.2933	2.67402e-06	0.423668
FBgn0040227	eIF3d1	292.244	300.278	284.976	140.983	163.24	148.193	108.841	110.003	103.359	934.63	841.122	770.304	469.808	446.45	445.127	479.227	463.549	469.385	444.948	427.418	426.462	357.209	365.053	376.738	2.86384e-06	0.367183
FBgn0014127	barr	269.56	256.158	257.795	118.966	147.038	134.944	97.4736	91.7768	94.7816	605.376	602.374	507.801	82.7301	89.0459	87.6795	76.0903	82.3409	78.1607	79.905	72.1932	78.5823	119.504	113.547	112.35	3.27291e-06	0.362511
FBgn0039737	CG7920	138.642	131.309	136.441	69.5273	75.1333	59.4372	48.9997	49.8104	51.8881	871.452	713.425	506.299	89.0758	91.7198	88.0892	89.7431	100.836	98.2667	99.0857	93.7705	99.5426	95.6545	95.318	101.179	3.37226e-06	0.370821
FBgn0015929	dpa	308.762	310.624	321.751	169.162	207.393	179.516	142.453	138.818	130.929	311.814	289.5	205.318	203.627	223.286	217.321	216.958	215.024	212.668	217.251	205.002	200.323	248.277	245.394	231.228	4.84369e-06	0.437981
FBgn0262114	RanBPM	150.827	153.627	159.166	77.2882	78.0891	86.4571	39.4606	40.3799	32.217	190.497	196.643	164.74	83.0919	80.7403	86.3543	62.5302	59.4302	63.9192	55.9348	54.1181	51.4383	116.899	116.131	106.221	5.07401e-06	0.241701
FBgn0030351	CG1840	256.136	255.873	249.423	132.646	147.049	164.013	81.9341	66.1338	65.9365	197.411	156.721	214.77	4.70673	8.26377	11.1994	9.14274	11.8942	9.96132	12.5464	8.49773	12.7242	12.9116	10.3947	11.5924	5.8221e-06	0.281055
FBgn0013954	Fkbp12	5119.39	4942.21	5338.87	1999.25	2123.8	2041.4	1224.67	1341.34	1348.68	13293.9	13679	15343.6	893.446	941.055	991.433	954.341	973.029	986.523	964.847	945.874	988.195	864.523	851.612	975.328	6.05533e-06	0.254193
FBgn0039640	CG14516	354.96	340.868	366.614	195.058	193.637	194.07	110.808	110.891	102.146	270.613	212.969	194.307	197.166	232.17	231.286	216.161	220.433	219.957	195.652	184.061	175.001	324.972	294.303	297.135	6.60441e-06	0.304811
FBgn0001225	Hsp26	22596	21436.3	22882.7	15107.5	13217.8	13322	8379.53	7959.05	8341.75	17374.9	14048.7	11039.2	3282.84	3508.74	3406.83	3586.59	3504.8	3601.45	3401.28	3301.85	3133	2834.68	3139.82	3085.52	6.91461e-06	0.368831
FBgn0038809	CG16953	82.0867	82.184	83.7504	37.5161	46.2047	39.145	15.1368	10.8131	18.3553	67.2652	74.0001	72.661	46.6253	53.9778	58.5834	58.649	61.3858	61.2434	65.8055	58.762	57.63	97.4219	105.108	107.53	7.18652e-06	0.178635
FBgn0263006	SERCA	259.504	270.1	274.037	171.441	168.683	171.062	110.634	99.1142	102.654	947.618	729.06	633.894	116.95	120.322	126.512	140.74	146.317	147.594	154.103	137.152	133.702	247.018	236.299	227.292	7.67417e-06	0.388734
FBgn0000044	Act57B	163.948	160.978	158.741	119.325	125.646	175.668	56.016	46.0271	56.0663	552.94	480.407	1247.14	2.40834	0.940077	0.992034	0.801892	0.584767	0.929805	0.485701	0.720633	0.550632	6.304	6.43902	9.50409	7.72909e-06	0.326897
FBgn0031875	CG3430	240.542	245.057	231.655	100.697	124.618	104.315	86.9026	74.2747	80.9444	372.658	361.864	348.274	94.4399	98.8684	100.252	96.5102	91.2445	94.3954	94.6598	91.2164	95.9865	129.923	129.639	126.105	7.84971e-06	0.337567
FBgn0037624	CG8223	781.39	778.254	814.954	442.74	392.606	471.136	219.093	241.408	269.133	2255.57	1933.45	1923.41	174.328	197.47	203.271	173.082	187.997	176.057	185.776	164.545	163.593	375.755	355.842	349.901	7.95123e-06	0.307267
FBgn0037530	EMC1	220.081	229.986	229.194	133.846	143.028	145.683	72.4219	85.5389	81.5994	628.948	524.739	464.013	144.309	149.588	152.179	138.351	140.57	137.465	138.486	134.022	124.908	173.903	141.789	153.6	8.19198e-06	0.352677
FBgn0033812	Pex13	117.417	122.796	127.003	39.3991	45.4219	70.5926	28.8263	33.4889	29.0481	115.146	106.238	104.565	34.3417	49.2354	49.4713	43.037	46.9835	40.058	46.3403	42.5413	38.7226	100.552	109.665	104.263	8.33069e-06	0.248799
FBgn0003449	snf	1001.46	992.439	1002.96	570.968	565.104	454.809	385.189	439.097	448.479	798.306	830.996	899.412	183.503	200.565	199.942	206.427	198.255	190.92	204.697	192.473	190.905	221.748	213.742	218.319	8.71572e-06	0.424701
FBgn0039073	CG4408	198.833	201.346	189.013	109.14	99.7969	94.0154	61.1821	68.2575	58.6644	634.066	613.789	579.139	79.2416	84.3994	84.7557	90.5683	86.9061	80.393	76.4663	69.9611	72.2841	69.4546	57.3012	67.8589	9.34887e-06	0.319257
FBgn0261859	CG42788	0	0	0	3.48257	2.17073	2.32066	2.2781	2.06734	2.32307	13.0001	12.2849	9.16187	4.91658	6.62497	6.70157	10.0509	11.2995	12.4226	13.074	12.064	12.6702	38.2684	36.798	31.4699	9.40975e-06	#DIV/0!
FBgn0250746	Prosbeta7	690.319	689.708	732.289	306.525	257.522	360.532	233.001	244.588	261.319	3268.56	2979.56	2790.21	272.708	303.251	302.135	312.076	301.926	303.973	333.472	318.185	313.688	329.639	329.63	357.435	9.59558e-06	0.349809
FBgn0001987	Gli	1.39706	1.3621	1.23909	1.86963	0	1.09098	0	0	0	7.30877	6.81133	7.53077	1.30242	1.50465	2.26735	1.72067	1.75062	1.18141	1.20815	1.37037	1.67541	3.80937	3.1905	2.48245	9.93061e-06	0
FBgn0035592	CG10674	241.293	268.819	271.273	0	89.2852	144.746	0	0	0	560.153	595.265	480.766	62.6747	71.4116	77.3501	77.6533	88.7904	79.4164	112.505	94.9654	97.515	85.3792	100.469	92.0587	1.10222e-05	0
FBgn0037652	CG11980	477.585	460.536	483.444	290.056	192.286	260.178	140.371	170.664	166.356	621.927	710.249	639.577	128.282	147.995	151.583	133.178	139.461	132.269	139.3	123.964	118.794	193.091	185.025	188.402	1.13287e-05	0.33582
FBgn0050349	CG30349	129.418	127.584	135.119	54.3022	43.3279	53.15	32.963	23.3457	32.803	227.76	223.969	241.779	54.8773	67.6565	66.7799	58.5	61.1079	64.5329	59.7304	55.322	58.602	100.015	86.4012	87.4269	1.32854e-05	0.227255
FBgn0014391	sun	2430.51	2353.83	2534.89	1066.27	860.252	853.251	655.377	525.18	676.747	2795.88	3451.23	2961.85	505.466	529.55	529.848	498.206	492.176	479.571	531.106	540.084	499.509	450.662	495.015	453.459	1.34962e-05	0.253757
FBgn0040394	CG16903	56.0749	54.1091	56.535	40.5009	36.4074	35.4228	27.2321	29.8589	28.4598	220.236	251.99	228.838	44.2364	56.2314	55.2993	53.0252	52.7039	55.8286	51.0245	47.1969	49.1739	85.404	91.537	97.5508	1.41323e-05	0.513143
FBgn0034537	DMAP1	165.846	161.773	177.568	42.4916	54.0008	56.6656	22.8143	33.1475	27.2735	284.048	331.888	324.859	38.3719	38.8073	38.6622	31.0211	34.1191	32.9498	35.0008	36.6432	30.0083	45.7163	54.7094	53.8478	1.49283e-05	0.164761
FBgn0014906	Hydr2	165.622	168.137	183.186	98.579	68.2934	70.6195	32.2487	32.0733	36.738	399.927	366.819	352.308	59.504	81.6394	86.5791	69.1463	89.2464	98.0419	100.747	85.3853	78.1652	165.885	177.847	182.79	1.68683e-05	0.195495
FBgn0038570	Prx5	375.939	366.897	353.922	116.767	88.0484	129.545	97.8337	73.7515	104.273	1617.68	1839.92	1576.01	212.904	193.915	192.851	203.846	215.209	203.275	232.49	214.884	222.408	211.956	194.158	210.765	1.70959e-05	0.251522
FBgn0284253	LeuRS	221.399	212.648	208.616	158.367	128.308	124.348	113.688	106.213	108.315	87.8047	87.7526	66.6438	138.109	134.588	139.303	112.776	110.303	112.119	102.297	96.8575	94.8364	139.361	126.072	115.55	1.80953e-05	0.510713
FBgn0270926	AsnS	188.124	195.18	175.336	102.068	68.4811	71.4458	33.5058	39.3899	41.2214	340.352	354.439	355.797	94.4644	105.264	100.895	91.246	93.6585	94.7072	82.9582	74.1518	76.748	137.975	145.857	144.519	1.885e-05	0.204276
FBgn0034617	Panx	132.183	142.673	135.348	58.9652	65.9586	69.3886	47.5062	39.4824	45.4962	87.3235	85.265	81.355	53.0934	55.0562	55.7269	45.8136	46.692	47.5366	41.0752	38.9488	39.7951	68.7759	63.6028	61.2262	1.92964e-05	0.322973
FBgn0042178	Apl	157.79	176.325	163.644	105.945	118.672	111.964	37.4618	38.6919	37.9537	57.6102	56.7271	92.6175	164.661	120.415	124.735	156.372	111.854	128.161	94.5073	103.213	92.5758	174.424	117.536	114.429	2.00125e-05	0.229243
FBgn0034237	eIF3b	756.851	701.768	700.68	418.597	436.145	444.657	277.648	271.93	258.056	750.226	731.572	665.846	800.317	785.832	764.087	748.791	751.797	736.862	660.906	702.594	670.202	469.597	487.205	497.284	2.05217e-05	0.374026
FBgn0032586	Tpr2	216.603	230.701	212.577	119.557	105.299	113.349	80.2379	70.3654	70.7309	1139.71	1219.97	1255.27	110.334	131.624	132.791	139.899	147.34	149.077	154.717	139.779	130.491	231.777	205.81	209.626	2.14243e-05	0.335416
FBgn0034654	eIF3k	205.25	190.558	196.746	88.6204	85.7684	146.258	97.3746	98.8282	100.06	1047.56	1073.25	1124.03	807.883	772.537	760.663	813.649	792.03	805.091	747.961	790.478	788.172	329.285	408.959	405.907	2.18618e-05	0.499976
FBgn0036180	Duba	170.271	168.257	162.722	87.6994	93.171	134.788	50.223	41.2566	57.2829	102.145	99.1016	82.4598	63.3057	84.8981	70.1837	71.8515	74.4148	63.8502	66.9692	54.0388	62.3638	133.61	110.738	103.932	2.19882e-05	0.296783
FBgn0029134	Prosbeta5	1057.81	1052.2	1127.96	820.137	737.691	677.327	403.329	410.046	352.654	3648.45	3690.48	3602.6	320.86	371.093	377.995	331.337	312.286	309.324	253.872	255.959	241.759	414.814	435.43	456.985	2.21386e-05	0.36011
FBgn0026418	Hsc70Cb	1098.95	1080.43	1123.68	661.602	650.074	702.871	465.921	375.854	391.579	663.537	591.604	512.412	303.46	336.14	332.661	294.312	308.354	305.013	290.649	253.187	251.446	421.398	419.91	405.348	2.2533e-05	0.373398
FBgn0037643	ScsbetaA	459.821	419.09	434.194	243.762	300.048	361.381	156.583	147.167	160.141	1492.29	1438.44	1381.12	186.965	184.84	195.042	199.255	197.93	194.517	183.886	182.496	177.853	181.262	165.372	174.431	2.25372e-05	0.353278
FBgn0026402	NiPp1	136.568	149.224	141.014	74.6685	57.2994	73.3378	21.7046	18.8528	8.05923	78.4029	83.1569	90.4925	42.2661	42.0514	44.7772	34.7962	44.4892	40.0497	39.0636	35.9003	39.5996	70.4254	74.29	70.7278	2.25521e-05	0.113908
FBgn0004419	me31B	7841.41	7474.7	6941.82	4214.49	3386.22	4206.62	1507.41	1558.44	1426.16	3198.95	3034.7	2905.52	1919.39	2176.91	2209.8	2056.18	2133.17	1996.14	2012.09	1711.17	1621.72	4361.43	4037.13	3782.38	2.33828e-05	0.201816
FBgn0035593	CG4603	388.686	404.552	382.445	223.249	159.533	161.903	155.153	123.07	141.253	104.289	97.4619	86.36	90.2815	85.6562	82.3623	75.9539	70.3372	70.249	75.9824	71.4845	74.1223	74.8828	81.5818	79.5598	2.46207e-05	0.356794
FBgn0027588	GCS2alpha	766.97	708.285	778.435	462.09	406.525	399.148	272.608	270.643	275.611	1513.15	1128.25	1091.56	254.959	266.38	254.053	211.23	209.118	209.122	186.949	184.605	176.217	200.159	158.813	184.279	2.54214e-05	0.363342
FBgn0035438	PHGPx	383.567	355.73	341.169	242.536	104.081	128.027	65.533	74.3749	55.4316	1162.27	1244.6	1199.67	124.76	172.238	177.021	171.809	163.545	174.871	164.211	177.552	175.762	297.346	325.393	307.345	2.6617e-05	0.180792
FBgn0042177	Arts	188.552	205.731	186.786	129.78	152.924	137.393	60.143	58.2882	62.22	85.0312	75.5327	107.002	245.801	250.875	254.385	236.452	241.595	241.295	209.671	210.843	201.629	264.399	247.261	231.821	2.66317e-05	0.310894
FBgn0035726	CG9953	1662.91	1740.62	1529.87	414.562	387.578	389.068	252.266	237.569	295.999	1867.26	1520.46	1567.83	363.045	385.999	378.421	233.268	224.162	225.675	221.564	201.68	196.522	234.222	192.513	217.431	2.71379e-05	0.159289
FBgn0010638	Sec61beta	328.929	283.038	323.416	106.536	163.63	137.601	0	0	0	537.15	585.109	501.06	99.0201	119.976	129.733	130.066	148.941	156.439	161.009	167.821	163.874	139.462	186.69	205.991	2.74058e-05	0
FBgn0002736	mago	182.981	187.678	172.785	184.652	82.5026	43.6938	75.3162	66.8981	66.0266	520.712	666.185	717.509	100.8	121.41	136.979	164.777	145.156	169.721	178.427	147.949	149.551	232.597	243.806	239.544	2.99357e-05	0.383187
FBgn0039379	CG5886	137.257	143.501	154.862	53.04	57.5819	46.7864	27.8426	29.9847	22.3538	62.0886	53.4695	56.0913	49.945	60.3415	60.4865	64.2555	63.1553	58.6746	64.0818	57.4645	58.0009	116.071	116.292	104.476	3.01758e-05	0.184062
FBgn0029856	CG11700	996.848	1022.79	890.885	361.444	383.82	365.636	76.0497	112.942	80.0157	2425.04	2331.48	9655.93	54.8598	74.2532	84.3738	97.4291	96.7064	93.6015	98.1855	85.7317	83.7354	142.757	104.446	115.014	3.06105e-05	0.0924259
FBgn0037199	CG11137	852.599	740.467	817.567	383.366	394.342	285.889	112.442	107.433	117.401	1810.76	1750.05	1840.2	267.633	292.954	325.046	348.882	335.089	348.147	342.712	342.71	354.553	314.991	295.728	322.351	3.16361e-05	0.139912
FBgn0250848	26-29-p	6705.71	6475.78	7414.35	1445.18	1352.13	1418.11	987.69	934.899	1050.7	10493.4	7997.3	7709.9	1828.28	2013.17	1966.12	1294.58	1324.46	1341.51	1195.68	1156.69	1170.2	1536.68	1307.98	1432.56	3.24684e-05	0.144363
FBgn0028687	Rpt1	661.161	642.449	599.126	343.618	312.645	319.068	230.665	212.437	200.657	1651.14	1557.87	1378.54	243.79	257.75	255.088	226.314	239.447	238.067	251.951	229.318	230.012	304.292	285.873	293.802	3.25997e-05	0.338334
FBgn0050389	CG30389	29.2332	29.0611	30.5924	16.0967	18.6453	15.549	11.8834	9.68332	12.008	37.909	41.4748	25.3515	32.6637	43.6481	42.7128	53.2578	63.0729	59.6037	73.3716	61.4012	62.3215	112.775	101.713	95.1953	3.3085e-05	0.377724
FBgn0038145	Droj2	402.525	402.813	423.716	226.47	221.08	228.897	184.011	156.859	184.191	4833.31	4296.74	4292.73	190.713	265.677	292.488	328.162	384.917	355.963	395.327	347.75	352.488	596.822	611.536	613.473	3.3773e-05	0.427208
FBgn0264493	rdx	205.293	212.631	212.942	119.582	239.282	313.008	65.5086	67.6473	45.4325	548.639	514.5	527.479	366.237	480.889	300.183	343.816	728.132	689.687	503.122	435.858	714.562	652.728	630.266	622.933	3.62279e-05	0.283084
FBgn0028690	Rpn5	373.714	368.802	330.798	154.4	126.286	142.247	55.062	66.8353	73.5302	957.225	924.455	786.807	149.473	187.331	188.053	201.358	215.895	218.651	234.387	207.09	192.104	386.824	383.993	363.659	3.65289e-05	0.182079
FBgn0003943	Ubi-p63E	4441.54	4814.9	4227.88	3401.82	3081.72	3087.24	819.183	785.537	976.593	3555.51	3762.78	11596.5	1315.36	1593.97	1572.86	1412.4	1390.12	1372.64	1296.57	1127.7	1126.87	1572.69	1218.85	1178.07	3.6597e-05	0.191431
FBgn0032026	CG7627	32.0842	30.9268	33.3933	20.8149	15.7117	16.5595	6.31741	7.15205	3.45918	64.0547	71.0977	65.1969	58.4688	75.478	78.3346	116.608	127.836	125.518	140.958	122.65	120.2	392.869	329.886	324.609	3.70182e-05	0.175601
FBgn0016687	Nurf-38	189.793	209.897	215.658	61.6945	70.0693	82.9225	28.1295	36.8737	39.2346	1252.76	1325.32	1134.93	375.94	347.652	340.737	393.954	373.673	370.516	354.039	358.214	368.141	263.247	283.587	284.751	3.71984e-05	0.169397
FBgn0010288	Uch	2328.38	2155.75	2297.28	1455.38	1172.33	1215.69	1190.83	1187.84	1152.48	3450.64	3069.61	2753.71	471.755	475.082	476.786	433.097	442.01	439.327	462.621	452.706	439.424	465.172	451.736	448.312	3.78707e-05	0.520709
FBgn0023529	CG2918	271.492	296.738	263.648	109.431	125.552	126.323	74.8194	64.4944	71.578	306.269	256.333	174.741	139.646	143.047	141.267	97.0592	109.473	105.993	93.8828	81.9817	83.3578	193.701	178.299	169.787	3.81466e-05	0.253513
FBgn0283450	Glo1	119.853	134.178	113.167	25.9088	64.0604	32.5963	0	0	0	1437.38	1442.05	1276.31	210.408	205.651	205.906	205.067	195.201	224.297	197.058	188.514	221.24	190.706	205.697	227.315	3.87775e-05	0
FBgn0261987	Pxt	10140	9318.7	9787.56	4657.05	4304.1	4342.64	4037.57	3346.03	3731.93	3621.73	2755.25	2291	1835.05	1782.9	1695.13	1037.91	981.683	942.755	863.216	830.33	829.306	890.257	737.227	770.634	4.12559e-05	0.380067
FBgn0033663	ERp60	1881.51	1743.41	2006.26	603.227	595.484	581.939	409.96	410.169	412.026	4066.94	3349.9	3063.34	604.655	662.4	653.532	499.417	511.643	501.002	500.951	471.054	451.755	651.874	556.769	618.674	4.23392e-05	0.218809
FBgn0032052	PIG-U	100.348	94.7753	97.1781	55.137	43.6692	46.5746	27.6143	29.9652	18.8926	95.6123	92.0485	91.4903	75.3301	80.5469	78.8598	80.028	86.225	86.9453	83.2505	75.1153	79.7672	115.707	103.671	99.6884	4.28038e-05	0.261621
FBgn0002948	nod	278.624	288.622	313.392	146.104	172.233	173.903	92.789	94.7739	94.9694	67.4374	62.3675	56.538	101.152	115.007	115.771	94.1278	99.6875	95.7026	88.7636	84.0823	84.2939	178.222	193.855	190.388	4.29322e-05	0.320827
FBgn0003545	sub	127.687	127.113	123.704	72.9224	59.3291	55.9045	48.339	43.3378	33.987	370.962	376.412	361.071	71.0248	85.5056	82.6331	81.6229	84.2797	82.2619	94.5482	77.5225	81.7024	127.451	112.838	116.018	4.32193e-05	0.332002
FBgn0262743	Fs(2)Ket	739.826	756.37	752.792	399.769	378.964	401.164	296.263	226.338	301.479	1969.12	1633.39	1358.81	290.42	325.818	315.95	382.852	392.241	403.74	422.736	386.562	381.15	559.039	475.003	474.563	4.33819e-05	0.366423
FBgn0032819	CG10463	11.1762	12.0531	11.448	5.41691	9.24283	6.6938	2.50702	3.72186	3.36908	80.2016	77.5402	78.9751	8.75299	11.5204	12.0172	12.8905	14.8863	12.6608	14.2018	12.2094	12.5998	26.0894	22.9608	24.0077	4.6958e-05	0.276779
FBgn0027091	CysRS	116.774	123.058	134.209	56.3236	48.0306	35.5143	20.866	27.1107	23.9751	213.104	232.938	211.079	60.2773	63.2576	60.5531	46.6745	52.8598	51.7728	52.9639	44.6188	43.9773	71.0849	66.3318	64.814	4.89516e-05	0.192364
FBgn0038686	CG5555	148.082	156.048	165.339	71.7855	57.2091	71.2005	29.906	31.2594	15.7551	16.183	19.8383	16.0455	77.9194	90.1089	84.9265	68.5459	71.5608	62.5394	66.1628	58.8871	60.0328	76.4798	83.3847	80.0852	4.90907e-05	0.163846
FBgn0013763	Idgf6	1414.05	1393.77	1565.98	636.297	571.613	625.299	429.746	400.091	369.826	3002.02	2537.06	2395.65	527.654	508.099	503.75	375.537	370.686	365.054	356.529	340.209	341.462	297.097	241.252	268.124	4.96702e-05	0.274284
FBgn0028692	Rpn2	416.293	420.549	449.566	314.214	272.84	289.956	215.179	198.593	215.438	811.182	663.497	543.122	153.298	184.116	192.958	165.243	177.15	169.978	168.918	157.294	155.327	240.768	251.503	231.435	5.03243e-05	0.489121
FBgn0027549	Nulp1	124.964	125.097	137.839	56.8778	58.572	80.8778	35.2463	42.9422	35.7785	374.325	327.086	409.583	47.6158	57.8982	60.0044	58.2949	63.053	57.6366	61.8343	53.5563	56.8921	103.078	88.252	86.1131	5.03506e-05	0.293805
FBgn0027378	MRG15	70.0035	69.3675	77.5395	38.0388	24.7414	27.3855	22.2827	19.2199	21.372	265.086	274.815	285.921	56.0869	61.005	65.7765	65.2837	69.9054	71.3349	64.9808	63.8995	60.4681	76.0844	76.6587	82.2764	5.03593e-05	0.289864
FBgn0260439	Pp2A-29B	1009.85	989.64	1068.81	646.026	613.311	603.035	531.006	479.785	509.156	2685.56	2348.96	2378.5	283.738	297.283	286.08	310.135	279.863	288.088	289.88	274.611	268.088	317.384	251.887	271.061	5.09907e-05	0.495371
FBgn0050382	CG30382	2174.39	1900.26	2159.77	977.579	903.573	998.947	396.65	411.433	328.113	1735.81	1643.6	3007.29	624.354	591.504	598.742	633.914	611.995	634.605	718.543	664.806	629.137	800.67	724.643	708.593	5.20094e-05	0.182246
FBgn0263121	Prosalpha1	2174.39	1900.26	2159.77	977.579	903.573	998.947	396.65	411.433	328.113	1735.81	1643.6	3007.29	627.565	595.88	601.793	639.642	617.791	639.012	720.609	670.93	636.56	806.286	731.785	716.854	5.20094e-05	0.182246
FBgn0032030	Wdr82	164.512	156.246	165.593	94.5152	53.1641	79.7641	53.552	61.944	69.5306	654.146	645.11	625.469	35.6072	48.1324	50.6777	53.1201	55.3033	63.4063	67.1912	54.5056	56.2312	67.9641	71.1265	74.4121	5.20527e-05	0.380438
FBgn0265190	PIG-S	83.6774	75.1958	76.657	15.882	22.0553	24.0194	10.4355	18.4804	15.2216	183.596	140.115	130.941	25.2701	32.8043	33.9076	31.3738	36.8811	32.7959	33.4444	30.8798	31.6277	39.2761	37.1869	39.7719	5.38079e-05	0.187397
FBgn0004598	Fur2	116.351	117.106	123.997	117.771	116.659	111.474	67.0052	64.6953	69.9116	266.216	370.87	250.803	82.0861	94.4005	94.7615	90.9818	97.1525	94.5182	85.538	84.223	77.2549	225.958	213.161	203.966	5.42262e-05	0.564023
FBgn0027779	VhaSFD	119.924	106.235	114.462	72.4945	75.4003	75.1895	34.363	33.9429	39.2743	392.229	430.755	383.469	81.8392	87.3446	85.5085	93.8547	100.938	97.64	110.412	100.803	98.0199	161.998	146.122	149.807	5.67952e-05	0.315836
FBgn0037632	CCT7	608.43	576.785	534.936	311.002	281.633	277.578	169.727	179.852	153.052	1861.6	1571.17	1345.64	205.931	224.217	234.094	232.156	242.427	237.101	263.545	242.44	242.369	325.09	338.705	335.129	5.72476e-05	0.292202
FBgn0035401	Alg2	36.6033	35.5811	37.5214	23.221	23.3203	17.9218	5.17477	10.379	8.25057	83.9455	74.4196	72.4089	32.3593	36.9384	37.9139	37.3592	39.8475	40.8329	30.8068	33.0631	37.1252	43.0049	44.6545	41.0023	5.89001e-05	0.216983
FBgn0031066	COX6B	1132.26	1080.57	1203.02	508.822	492.277	496.351	378.956	277.721	318.807	3180.57	3583.57	3278.02	245.663	295.491	278.161	288.353	313.042	320.082	315.309	295.137	338.091	327.702	343.032	338.268	6.05e-05	0.285576
FBgn0044511	mRpS21	856.003	887.739	813.147	379.436	465.273	487.353	299.083	368.139	322.335	491.79	570.03	647.519	159.648	170.421	163.637	182.964	195.326	176.272	214.664	175.362	185.066	165.567	159.624	136.285	6.08608e-05	0.387016
FBgn0260771	Larp7	103.593	91.3295	103.549	49.1332	45.222	60.0387	23.597	25.1411	19.9439	64.4416	52.6182	57.9737	57.3758	69.7783	71.1686	72.1802	76.4964	69.9961	67.9354	64.4173	68.8414	123.93	121.274	119.839	6.17496e-05	0.230112
FBgn0000454	Dip-B	305.985	268.788	286.246	173.061	142.222	161.908	98.7918	95.3842	91.3022	1299.04	1085.2	862.147	206.585	223.776	226.059	246.651	239.256	242.895	231.063	237.434	232.657	202.665	206.244	211.95	6.25538e-05	0.331558
FBgn0040493	grsm	346.346	343.736	366.84	204.529	198.792	186.951	120.395	103.58	77.7911	931.878	904.435	659.604	236.489	253.894	261.017	269.784	248.4	248.458	246.495	213.301	216.161	206.114	200.058	201.466	6.25846e-05	0.285515
FBgn0250843	Prosalpha6	1491.34	1408.95	1508.44	1022.34	881.017	856.73	610.404	671.408	537.848	4594.45	4519.34	4493.35	476.268	530.048	556.65	536.633	514.649	503.535	506.899	522.543	502.019	418.33	416.778	442.118	6.26825e-05	0.412741
FBgn0034062	CG8388	24.4871	22.4164	25.407	5.01378	7.46526	7.94829	3.29557	1.33317	0	13.8434	17.1839	18.0152	13.4801	12.8209	12.9413	11.1683	13.8355	13.1816	14.4623	12.3114	11.9197	17.9792	19.4936	19.2702	6.53279e-05	0.0640119
FBgn0014417	CG13397	125.825	124.488	117.7	82.6972	72.201	78.5979	52.3389	55.8167	44.6707	287.493	250.738	235.157	48.299	57.714	53.5825	53.8578	50.8871	51.3512	46.9783	40.1177	41.5682	58.7571	48.466	51.7272	6.53446e-05	0.415275
FBgn0030693	CG8974	231.588	200.974	207.308	88.4047	67.9804	67.1642	20.3602	34.2401	13.8053	334.59	369.165	672.077	86.3744	101.146	110.749	120.622	122.077	126.062	124.838	109.859	114.816	141.235	155.727	155.706	6.77781e-05	0.106905
FBgn0016697	Prosalpha5	1132.64	1189.28	1249.6	663.252	509.847	568.707	351.372	430.119	311.573	3148.97	3065.84	3185.28	454.091	387.435	403.691	418.597	411.609	404.401	423.278	388.837	392.982	469.204	427.075	439.428	6.97396e-05	0.30605
FBgn0010342	Map60	475.956	490.816	438.955	303.244	264.532	284.158	178.234	181.824	198.66	1060.16	1171.35	1226.57	138.094	165.556	170.931	175.221	178.653	171.667	188.595	168.409	163.068	259.425	255.139	252.071	7.09981e-05	0.397458
FBgn0286818	Pdi	386.652	391.015	413.084	223.861	212.564	222.912	132.879	147.642	173.906	3509.14	2660.86	2446.29	658.076	617.25	615.988	702.373	705.55	730.099	697.152	720.582	680.88	564.426	540.34	599.443	7.18336e-05	0.38163
FBgn0266064	GlyS	309.431	302.637	289.429	158.478	182.981	171.949	102.966	129.228	98.3586	1096.61	1012.82	875.527	186.438	193.819	189.767	181.857	190.112	187.241	170.903	175.225	175.334	231.358	221.558	226.772	7.19868e-05	0.366671
FBgn0020238	14-3-3epsilon	1922.47	2125.96	2175.75	1357.84	852.533	1504.57	745.128	689.125	641.378	7713.79	7956.31	9914.76	881.633	942.389	962.213	1152.58	1155.92	1169.24	1340.34	1306.36	1300.51	1198.4	1131.67	1192.96	7.62951e-05	0.333479
FBgn0038369	Arpc3A	200.693	197.074	210.269	51.2212	74.6633	84.1062	37.5956	53.3045	21.6371	218.23	252.894	200.152	68.4778	57.8679	60.1546	58.219	56.2165	66.5463	64.855	67.9079	60.9399	70.4804	77.0945	77.4322	7.7242e-05	0.185083
FBgn0017566	ND-75	187.07	185.844	204.124	101.438	116.126	107.895	76.8837	84.4333	86.7656	558.059	436.821	360.364	132.777	133.709	128.639	135.55	128.999	130.389	130.357	127.222	126.053	124.993	113.168	117.434	7.73803e-05	0.429925
FBgn0010488	NAT1	1642.18	1650.32	1708.37	988.725	906.992	854.573	821.832	705.5	638.58	1090.34	1069.58	1003.7	635.123	639.402	632.779	445.79	442.858	441.521	401.61	390.666	369.99	483.204	387.766	360.325	7.99841e-05	0.433107
FBgn0011336	Stt3B	137.782	139.125	119.909	59.6758	88.3845	64.8564	18.5391	26.8374	23.9278	241.607	201.148	192.83	73.6497	69.7227	69.5485	52.4014	48.69	47.2602	31.6873	33.0803	33.0322	70.5924	65.2431	66.7084	8.07661e-05	0.174651
FBgn0031493	Sf3b2	88.7964	96.0564	91.5821	42.5364	45.3051	56.931	38.2332	41.0783	32.2512	410.538	406.17	374.902	51.0194	60.6642	63.9968	64.4983	66.4059	65.5656	64.675	57.9378	55.1956	122.21	104.997	104.437	8.10429e-05	0.403577
FBgn0032050	CG13096	362.081	396.53	393.098	193.897	145.337	176.364	158.039	135.855	122.749	844.673	782.369	754.58	91.0409	100.019	97.9806	70.1293	75.681	75.6799	72.0233	70.5614	67.9407	116.949	107.38	109.491	8.30021e-05	0.361761
FBgn0040754	CG17059	937.059	816.772	905.987	203.67	238.845	236.399	0	0	113.195	450.936	481.473	641.339	60.0713	63.8712	71.4097	42.0571	54.5397	43.2738	37.7251	48.3116	58.6856	54.0287	63.5648	61.9995	8.35819e-05	0.0425573
FBgn0021995	Rs1	65.4041	74.6143	72.9217	35.3953	37.5635	31.8191	17.3746	20.9456	21.7825	116.316	135.113	157.81	37.2944	42.4747	46.4235	35.2188	42.1726	42.7929	36.7375	34.8357	30.7331	68.357	66.7171	63.6782	8.40747e-05	0.282252
FBgn0036918	Pfdn6	695.005	667.584	656.749	178.051	263.528	354.053	127.237	208.564	213.919	783.067	773.362	864.857	184.198	208.101	200.113	228.237	195.29	217.704	230.596	226.574	202.796	239.557	203.323	215.825	8.52512e-05	0.272228
FBgn0034432	CG7461	313.361	341.549	289.344	118.601	115.721	125.15	64.2043	71.5419	69.2859	382.922	386.373	328.918	94.655	103.243	105.525	70.321	75.1499	72.2552	68.3401	61.3422	60.1269	159.155	141.045	136.98	8.56341e-05	0.217137
FBgn0014861	Mcm2	373.541	362.978	406.872	242.8	249.121	217.355	169.914	165.067	164.405	443.906	445.884	350.947	217.833	214.01	208.53	210.767	213.866	204.68	197.191	189.665	186.421	227.761	226.162	217.561	8.7229e-05	0.436759
FBgn0011726	tsr	3234.68	2991.31	3511.28	1322.18	1217.43	1285.19	839.249	723.459	777.078	8322.66	9376.49	10047.9	2541.11	2450.33	2447.47	3017.63	2811.39	2724.53	2969.69	2983.48	2777.73	1941.65	1933.78	1890.95	8.86954e-05	0.240292
FBgn0023521	CG3587	16.1704	17.563	15.6396	7.58648	0	7.08419	0	2.391	0	100.629	82.2145	102.389	43.4646	53.2924	52.6655	58.8862	56.1924	66.3244	54.8808	54.64	57.5992	44.2174	50.4284	49.9037	9.03412e-05	0.0484273
FBgn0086254	CG6084	830.405	788.336	756.682	401.547	450.445	474.861	290.494	325.343	244.4	2903.61	2633.17	2185.04	421.073	494.466	500.41	536.189	563.656	549.627	535.768	517.635	491.393	683.997	707.869	703.186	9.0812e-05	0.362141
FBgn0033935	Sin1	90.9792	90.1186	97.0965	56.6492	60.5445	42.7253	42.3443	40.7365	33.9549	72.1222	74.4826	76.6807	43.0168	49.2562	51.6548	57.9215	51.8748	52.9292	51.3957	48.5724	45.6165	64.0654	67.325	64.5801	9.1753e-05	0.420698
FBgn0016696	Pitslre	110.266	120.341	118.311	51.3289	53.3316	47.9225	33.1318	33.5762	19.646	427.545	520.684	516.211	78.3214	94.2713	98.5453	95.1505	99.1985	96.5806	108.06	90.9747	86.4117	243.983	221.02	206.953	9.18142e-05	0.247491
FBgn0052581	CG32581	133.57	118.8	111.799	60.3036	39.57	37.139	4.49528	12.4906	13.5126	212.109	231.932	523.334	62.9767	73.2253	78.2399	83.6943	84.6728	91.4802	87.7512	80.8817	76.9713	94.4948	109.154	109.156	9.28211e-05	0.083748
FBgn0026261	bonsai	152.34	159.399	142.759	101.862	73.221	101.882	52.1302	58.7147	44.7079	63.0894	90.9691	110.493	149.489	138.456	136.257	137.309	134.71	134.06	129.327	135.267	132.632	137.631	143.548	140.732	9.30315e-05	0.342253
FBgn0034277	OstDelta	127.948	131.484	115.777	51.4784	58.6986	57.4359	33.2376	38.2106	26.2182	1384.65	1141.12	1100.31	78.8828	96.7188	97.727	101.559	108.512	107.544	120.518	101.475	94.6466	142.128	106.45	124.765	9.61893e-05	0.260298
FBgn0015218	eIF4E1	729.737	695.075	760.5	303.101	260.245	323.198	155.866	236.341	238.31	1195.13	994.818	698.842	694.63	749.619	736.388	889.115	927.763	934.678	946.648	937.26	922.878	991.923	1146.87	1096.09	9.70186e-05	0.288525
FBgn0263594	lost	450.802	431.118	486.188	306.753	281.659	307.711	184.848	193.384	170.158	1634.71	1346.34	1214.21	373.637	492.524	500.741	612.953	651.336	613.963	671.021	602.043	587.344	1029.89	1033.1	1034.59	9.78259e-05	0.400838
FBgn0035383	CPT2	61.2514	69.099	64.4719	35.6237	44.4392	38.1915	23.4899	26.4039	21.836	167.238	169.391	174.829	26.1976	29.5726	27.3557	27.1601	27.0808	29.4694	32.0223	28.0783	25.1721	34.3676	37.3162	36.7826	0.000100066	0.368181
FBgn0035603	Pfdn4	1126.35	982.036	1120.19	457.931	390.972	420.437	262.525	325.797	273.544	719.691	714.455	849.735	275.029	227.315	245.593	213.57	211.122	221.644	222.619	219.387	211.291	279.084	273.968	251.474	0.000101888	0.266949
FBgn0015283	Rpn10	1402.03	1552.31	1552.33	873.34	885.192	907.426	725.645	705.123	728.483	2546.52	2112.77	1886.17	341.138	363.113	346.787	318.781	302.898	310.902	299.343	287.116	283.135	293.373	273.602	282.025	0.00010235	0.479123
FBgn0001218	Hsc70-3	2454.79	2436.67	2793.53	1246.85	1218.74	1278.54	748.527	665.842	757.398	4584.39	3150.49	2634.8	650.429	705.679	676.587	650.349	694.639	697.391	663.221	627.025	598.709	825.373	771.838	787.921	0.000104855	0.282599
FBgn0261020	wol	31.3461	30.2789	32.9564	0	17.9568	27.4228	11.8453	12.3782	8.83715	311.831	287.426	281.416	31.6381	35.9977	39.4548	40.5358	46.5441	36.5109	48.6225	43.6562	42.8243	75.2741	68.1032	71.0061	0.000109295	0.349546
FBgn0015544	spag	219.4	247.126	222.036	113.764	123.52	120.716	75.0002	60.5727	52.7721	87.0345	59.9785	68.128	69.868	81.5224	79.6742	79.4654	77.0616	78.2914	83.592	70.0356	69.423	98.5684	101.844	94.2729	0.000109457	0.273534
FBgn0284243	betaTub56D	2537.72	2763.36	2443.19	1138.44	1447.74	1310	985.286	1101.76	973.201	27282.1	24346.4	23500.6	1421.52	1624.56	1612.49	1688.55	1732.45	1797.31	1795.6	1723.79	1756.01	1707.69	1556.84	1742.68	0.000112283	0.395162
FBgn0017577	Mcm5	555.328	568.767	502.004	286.293	321.284	306.834	233.947	229.429	218.178	685.464	654.035	547.703	213.109	238.224	235.645	214.596	218.761	215.76	197.659	200.809	190.893	301.21	278.31	271.776	0.000113564	0.419134
FBgn0025582	eIF3e	118.529	130.567	137.804	65.7194	102.254	64.6647	40.0672	31.5365	37.5816	1220.75	1222.06	1051.47	492.742	528.861	522.783	542.407	541.34	543.993	532.079	518.257	501.696	384.072	366.48	396.315	0.000114678	0.282205
FBgn0003676	CCT1	362.928	322.302	315.94	166.761	179.09	174.141	88.4774	91.7564	107.641	1192.02	1058.28	833.563	340.591	354.224	357.069	376.814	393.154	390.562	399.112	380.138	373.133	430.59	431.203	427.175	0.000115418	0.287539
FBgn0031604	Elp3	67.5599	70.9826	62.2579	49.3384	38.9165	24.7745	28.9621	28.4929	27.4414	82.437	93.872	90.4478	39.6554	43.181	44.6371	46.195	53.4226	48.7873	51.1082	49.4495	50.3018	75.6767	80.2663	78.8052	0.000115418	0.422789
FBgn0266441	CG45071	16.4352	17.4416	16.0537	6.09657	7.34288	6.9838	6.02689	7.52733	5.80935	28.8058	33.1743	22.0537	15.0703	23.1616	24.9972	31.8948	33.6046	34.894	34.6255	31.1979	29.4356	73.1218	75.7783	65.0073	0.000115901	0.38781
FBgn0037376	Hat1	453.365	410.12	407.162	255.445	234.702	228.79	182.46	167.864	153.417	1162.18	1205.91	989.533	144.658	164.967	168.381	152.303	152.254	145.435	154.667	138.211	142.817	205.931	196.244	203.499	0.000117306	0.396444
FBgn0000042	Act5C	3601.85	3585.62	3933.69	2574.71	2603.97	2686.91	2020.78	1960.33	2005.39	28163.1	23231.2	25805.2	1491.22	1599.32	1619.19	1781.69	1831.57	1874.79	1866.09	1849.27	1856.69	2011.93	1999.12	2219.42	0.000118104	0.538298
FBgn0001222	Hsf	62.0184	64.4964	59.9822	47.3681	46.3807	56.6992	31.5707	25.5118	25.9836	283.405	301.082	332.525	58.5539	88.608	96.9889	111.299	122.626	121.524	129.13	114.743	109.224	241.958	235.837	234.279	0.000124125	0.445402
FBgn0285926	Imp	440.306	398.034	400.975	276.928	261.27	284.685	185.457	184.301	204.722	297.011	299.058	250.913	149.646	177.064	177.619	207.344	197.648	211.216	215.952	209.451	196.02	237.123	248.502	233.349	0.000127095	0.463546
FBgn0002924	ncd	173.405	164.714	194.097	69.966	74.1957	131.802	48.2684	48.7266	52.2777	334.586	325.73	305.599	114.524	121.575	119.18	111.648	119.341	123.665	120.495	110.928	114.837	136.566	143.444	142.454	0.000131702	0.280474
FBgn0027088	GlyRS	309.914	300.735	305.85	176.64	167.603	162.483	139.625	123.319	96.504	330.674	308.277	228.368	138.379	141.777	137.533	130.457	131.077	134.271	134.653	122.19	116.975	157.215	148.783	138.698	0.000133247	0.392197
FBgn0039293	Alg9	139.913	161.49	148.353	63.296	60.2266	76.1861	31.68	20.9233	39.4004	252.065	278.415	255.877	66.4543	76.888	74.388	69.7125	71.6149	69.404	64.5447	59.4294	60.4874	97.2059	89.8443	86.5582	0.000133381	0.204563
FBgn0262732	mbf1	1656.46	1735.32	1435.35	785.592	756.7	782.627	268.482	254.571	162.726	730.834	790.18	820.65	368.41	366.4	385.196	360.418	360.981	381.52	407.744	339.413	360.102	387.168	400.941	411.885	0.000134344	0.142068
FBgn0033209	CG12107	618.522	615.33	590.042	297.709	295.305	319.59	181.085	72.5929	94.652	58.5725	94.6645	68.9403	106.764	125.076	118.558	112.438	127.477	127.495	116.464	128.939	141.615	154.981	175.281	151.154	0.000137566	0.190982
FBgn0262716	Arp3	99.1833	93.0511	98.1652	49.8386	33.3892	45.9245	16.9547	28.3342	10.9125	173.896	199.095	253.046	55.8954	69.669	72.4877	76.4559	87.827	84.5117	85.3371	79.3667	83.7852	121.447	122.913	134.302	0.00013784	0.193531
FBgn0027949	msb1l	135.002	131.299	152.061	77.3664	67.5677	73.7534	44.0697	39.5463	34.2365	295.554	247.804	333.992	85.3523	102.018	114.265	117.242	126.337	124.956	134.893	118.526	122.655	218.12	217.717	213.435	0.000138263	0.2817
FBgn0040064	yip2	778.411	705.031	695.315	314.312	349.769	299.906	170.82	255.769	215.603	1091.76	1003.01	898.536	232.159	227.54	232.421	220.406	211.396	207.505	218.541	208.415	211.01	227.88	244.583	238.651	0.000140436	0.294751
FBgn0260817	gkt	163.549	150.46	156.027	89.7171	104.7	98.1464	46.4076	42.5797	22.2434	103.497	88.7348	88.5306	60.607	54.1088	60.5277	54.1946	52.8161	56.687	56.5126	45.0766	42.0083	85.8828	86.8301	81.6554	0.00014151	0.236643
FBgn0086912	mbm	85.1517	84.2691	76.077	43.765	30.2282	30.5421	18.2512	27.5442	18.0709	115.81	115.553	124.596	74.6659	75.5791	77.3781	70.5792	80.114	73.3231	82.9009	73.9736	73.6955	143.528	139.69	131.49	0.000142095	0.26015
FBgn0040079	pkaap	35.7463	33.6884	31.3738	25.106	9.98825	18.9436	14.3253	12.5192	14.3178	30.7089	36.6525	35.4385	27.217	30.9128	30.8638	33.2616	34.4325	37.9852	40.1159	31.9567	34.2116	64.651	61.0071	58.8814	0.000142185	0.408321
FBgn0002878	mus101	58.1754	62.5509	61.8336	48.6697	55.75	50.2478	36.2593	34.9847	31.9459	89.6262	71.3116	56.6628	43.4995	50.2772	49.7515	46.5347	51.2986	50.3505	47.0017	41.6972	40.8468	110.404	98.7505	90.3197	0.000142922	0.565239
FBgn0031052	Elys	47.1569	45.4107	46.5749	31.7535	36.5267	34.2033	27.1557	23.7551	28.0957	149.786	147.914	153.579	26.9136	35.2686	35.991	31.1652	33.9122	33.3253	36.3448	29.4801	28.1765	102.021	83.8315	81.2192	0.000144097	0.56781
FBgn0024188	san	1497.48	1388.9	1379.51	1270.45	1115.28	1136.41	813.138	868.817	828.646	3380.82	3632.39	3551.05	240.385	242.061	259.542	289.908	271.237	286.688	274.712	235.515	264.769	233.537	207.228	245.802	0.000144564	0.58853
FBgn0039358	CG5028	174.875	187.459	165.684	105.423	109.559	107.044	35.2334	55.7228	33.6424	838.84	726.052	713.983	131.088	148.721	151.441	191.253	207.903	204.119	211.508	199.502	198.609	163.649	166.064	171.173	0.000145024	0.235974
FBgn0010431	mtrm	6766.57	6555.6	6781.62	5192.93	5208.31	5177.76	5326.54	5140.52	5366.69	1157.9	957.946	1001.46	969.86	1012.69	1050.58	1053.35	953.039	988.287	1031.54	1001.36	976.04	984.659	962.247	921.937	0.000146463	0.787601
FBgn0028734	Fmr1	253.154	247.767	272.191	123.303	146.738	155.871	98.9161	83.5893	113.084	111.239	127.668	92.8323	112.124	132.291	134.656	137.575	153.282	159.146	157.615	140.566	145.583	237.014	279.776	245.425	0.000146796	0.382337
FBgn0027554	CG8042	47.4427	46.4373	41.7213	24.6913	18.4343	15.3175	16.5349	12	14.1857	248.261	232.216	230.872	22.8561	30.8734	31.4843	34.3231	33.3233	31.9273	34.1962	32.7964	31.2714	38.2134	35.1782	37.5739	0.000147055	0.315045
FBgn0015075	Ddx1	144.079	120.259	136.5	44.8793	36.9389	48.6259	29.7977	23.7218	32.1736	176.709	141.598	117.865	43.9626	49.1878	49.5361	23.967	25.7606	24.3069	20.7169	21.2333	17.629	56.0618	63.5503	59.0595	0.000147863	0.213785
FBgn0032488	CG16812	295.295	320.386	314.595	233.4	208.171	215.7	116.436	128.062	87.5933	255.711	249.54	305.816	113.563	113.538	113.342	85.9095	89.3535	85.035	88.6067	73.8267	75.8089	102.418	103.405	98.5113	0.000150126	0.356982
FBgn0036887	CG9231	332.718	338.485	385.124	124.571	140.284	136.433	85.2919	101.232	110.023	1172.11	1442.7	1376.33	171.037	175.774	175.002	214.048	194.959	204.987	227.129	208.327	218.447	226.447	193.238	219.613	0.00015138	0.280734
FBgn0030956	CG18259	57.0531	66.6163	56.6946	27.4824	31.1613	22.505	9.29042	11.9403	13.7234	269.979	305.628	556.556	74.802	79.9757	80.693	97.8209	104.437	109.686	112.216	106.34	114.368	191.719	190.67	196.638	0.000156735	0.193798
FBgn0034902	CG5532	768.465	687.354	636.191	255.791	173.521	166.867	137.614	95.5755	142.417	1023.98	986.512	1140.83	102.236	103.169	104.952	77.1864	73.3823	81.4529	76.4701	91.0792	80.0278	95.0095	82.8303	105.613	0.000157155	0.179543
FBgn0015222	Fer1HCH	1962.75	1857.27	2047.48	820.125	852.509	960.583	774.691	816.643	588.64	7781.28	6561.49	6470.38	628.368	627.451	602.032	622.509	617.222	660.273	674.935	676.79	648.484	474.151	474.664	530.344	0.000159887	0.371533
FBgn0000043	Act42A	1259.5	1219.13	1390.7	776.996	673.992	681.406	434.749	417.391	519.51	3168.14	3049.99	2945.32	300.713	306.577	295.391	260.571	250.51	239.084	219.816	224.969	211.309	260.115	210.06	233.967	0.000163052	0.354493
FBgn0039562	Gp93	219.996	199.333	200.305	111.606	121.401	99.3613	56.5483	59.1434	81.0872	1318.63	940.918	901.223	155.137	156.932	158.852	161.1	168.775	171.734	162.791	161.067	153.994	205.032	178.2	192.791	0.000164547	0.317573
FBgn0267727	Pen	2838.75	2713.05	3193.24	1582.74	1471.92	1590.98	882.582	886.351	967.206	9401.09	7946.42	7119.43	676.404	745.795	744.615	648.501	673.846	693.507	696.255	624.871	630.401	825.076	780.732	814.838	0.000165295	0.312879
FBgn0040290	RecQ4	165.321	188.839	185.427	119.932	120.684	114.781	78.5469	77.6091	80.6189	61.389	64.3019	49.1069	114.04	127.36	118.692	89.151	81.3481	83.8789	57.959	53.1318	49.7523	113.856	104.236	96.7295	0.000166487	0.438808
FBgn0036306	CG10973	100.388	110.18	103.171	64.0542	56.0761	62.3519	21.0395	36.5763	32.2417	62.72	76.1986	87.5874	45.8488	55.5825	53.0694	46.7724	54.7597	52.4471	57.9383	52.3773	44.9489	83.4838	78.6073	70.7234	0.00016706	0.286409
FBgn0032479	CG16974	141.266	157.919	158.484	82.1362	95.5183	77.1367	73.6056	65.9153	70.3301	329.21	326.847	283.77	158.722	175.284	166.724	147.841	154.511	149.788	149.892	135.393	128.628	217.619	166.612	180.275	0.00016893	0.45852
FBgn0023174	Prosbeta2	906.877	856.874	917.953	474.912	389.645	386.354	173.158	252.585	323.799	3059.41	3200.31	2996.35	247.829	282.14	287.855	256.992	284.278	288.085	268.594	290.396	265.383	280.073	296.647	319.581	0.000169722	0.279502
FBgn0259682	Jabba	533.424	581.44	635.194	146.918	219.534	258.361	62.0237	132.132	75.5544	1126.78	1154.53	946.715	513.609	606.606	640.586	708.353	715.045	732.454	723.667	703.107	681.33	867.728	948.671	903.437	0.000171422	0.154115
FBgn0053828	His1:CG33828	11.041	12.6507	10.3306	0	0	1.06966	0.796706	1.30943	0	1.19172	3.02293	19.9501	74.1642	95.9428	110.708	113.392	129.093	121.072	157.088	135.968	133.375	195.824	217.747	222.782	0.000171553	0.0619048
FBgn0012036	Aldh	611.012	533.003	513.059	310.558	264.645	328.87	147.751	150.626	143.593	1283.59	1035.23	867.563	230.87	245.853	197.811	213.831	208.731	233.534	176.909	192.663	196.06	250.837	234.658	227.356	0.000173169	0.266717
FBgn0029687	Vap33	646.565	617.065	749.615	258.469	191.758	284.835	109.428	61.6429	48.7461	2059.64	1742.14	1927.73	150.401	175.649	189.948	206.133	223.152	208.292	260.574	229.865	219.979	340.142	331.287	343.375	0.000173198	0.109185
FBgn0085436	Not1	140.389	157.106	154.795	85.9331	91.9388	78.7717	77.9402	71.4972	70.3712	399.538	445.041	373.042	73.7576	88.427	86.2108	63.6164	71.3759	68.879	76.2025	67.9738	65.8285	291.693	233.512	221.853	0.000173812	0.485989
FBgn0051354	Hsp70Bbb	23.6885	27.9334	24.1788	10.1139	12.2804	11.332	1.55667	3.06214	4.82552	20.0479	15.3046	79.676	2.99725	2.85908	3.15664	2.97415	3.11286	3.65727	3.82237	2.67091	2.70256	6.61428	7.19026	5.88976	0.000174907	0.124594
FBgn0001226	Hsp27	17532.9	17002.1	20107.5	9115.1	7757.92	7988.48	5261.61	4793.75	5273.29	9300.06	8276.81	6629.87	1279.19	1561.88	1605.78	1011.66	1113.51	1033.07	893.357	864.516	851.095	1146.6	1494.9	1399.2	0.000175061	0.280526
FBgn0023143	Uba1	418.779	377.405	387.628	235.81	287.086	229.432	199.693	171.116	195.289	985.211	747.896	640.922	215.579	198.406	202.22	199.19	207.554	208.832	215.442	201.933	196.671	375.738	355.414	340.331	0.000175827	0.478199
FBgn0037442	gzl	16.071	16.8206	16.2925	6.17948	7.35844	7.8811	3.53615	2.47493	0	39.9281	37.6862	28.414	35.478	43.0347	40.6121	48.0383	55.4425	54.6974	60.8231	55.622	56.9711	83.0668	79.9382	82.715	0.000177431	0.122216
FBgn0011016	SsRbeta	444.707	374.177	429.099	199.988	167.268	191.873	84.2509	75.5884	113.178	518.002	431.885	364.217	155.712	181.796	179.037	213.673	214.375	208.737	255.541	221.326	225.44	257.239	276.819	265.359	0.000178449	0.218767
FBgn0034372	Gint3	72.6853	84.8199	79.0839	29.8824	19.1871	27.3759	14.8091	22.8397	13.0394	147.687	131.766	84.7751	48.367	57.2534	57.3089	47.2873	50.7434	53.0231	57.8304	50.3713	53.212	93.7195	95.5162	91.6613	0.000179224	0.214246
FBgn0030710	CG8924	35.8543	42.384	38.7497	16.5814	16.9388	20.4716	11.2636	12.1501	13.4562	244.712	249.525	272.631	22.9643	41.7898	41.6261	48.5546	59.9273	55.001	63.2575	54.7437	52.874	128.56	132.475	135.276	0.000179536	0.315159
FBgn0022213	Cse1	752.214	762.796	701.305	493.61	425.331	470.761	418.764	358.145	368.644	850.717	842.515	627.071	259.822	279.065	275.195	236.468	245.896	232.439	215.678	204.325	197.955	365.076	318.345	313.56	0.000179694	0.516873
FBgn0010380	AP-1-2beta	260.574	240.886	277.28	116.642	111.055	120.214	98.8415	72.1898	84.3595	297.375	266.42	245.898	75.3497	83.9161	78.8594	68.8413	69.8669	72.8677	76.0335	69.2607	70.7678	107.277	107.573	106.196	0.000180382	0.327954
FBgn0029506	Tsp42Ee	369.182	345.46	354.018	255.511	153.091	233.174	82.5883	141.031	99.415	639.246	663.196	679.994	72.9458	82.3475	91.3639	80.8361	88.1417	92.5414	87.1148	73.7555	79.6774	157.548	144.542	156.856	0.000185349	0.30228
FBgn0260484	HIP	956.361	995.179	1173.01	677.73	589.726	598.616	164.897	127.038	115.444	1279.3	1101.17	2097	230.231	243.535	230.873	211.885	214.822	212.01	209.243	198.443	190.838	210.954	181.803	196.983	0.000187383	0.13038
FBgn0030959	CG6961	53.5801	58.5976	63.233	31.4024	37.4792	24.578	6.11756	14.2865	10.4433	246.88	280.089	550.878	78.0466	94.2878	94.5544	114.179	118.647	128.408	142.154	114.321	131.655	228.639	219.686	223.619	0.000190559	0.175858
FBgn0014028	SdhB	268.713	229.649	275.528	104.05	104.189	75.4273	60.4184	61.0156	70.9795	472.027	442.065	466.751	113.852	109.631	110.651	134.28	129.453	134.401	150.294	139.863	138.883	124.019	140.839	134.22	0.00019101	0.248631
FBgn0039877	Mccc1	71.4951	68.3983	67.1536	40.3349	39.0879	28.7771	23.1698	28.3484	17.05	166.384	155.611	123.083	58.7262	64.7861	63.4127	56.7426	54.8808	54.5053	62.7531	53.7039	50.7208	111.105	100.914	101.347	0.00019335	0.331172
FBgn0052699	LPCAT	61.6104	61.3487	55.6391	16.9945	30.9953	25.0683	21.3749	12.3847	16.923	142.159	139.311	120.851	26.1325	33.6854	33.6328	37.0922	39.6086	37.3162	35.2624	35.7896	35.9659	75.8541	85.1191	82.1446	0.000193789	0.28378
FBgn0013277	Hsp70Ba	21.5112	26.0471	25.5498	9.20021	12.0784	11.5393	2.09555	2.27585	4.50241	19.3189	13.9319	66.4153	2.99725	3.28539	3.52645	2.7904	3.81318	3.73264	3.34035	3.23452	2.66266	6.40986	7.5397	6.4377	0.000194683	0.121379
FBgn0263120	Acsl	52.1085	54.1363	57.9723	32.3475	49.1722	42.1237	19.7529	25.1148	24.5132	113.01	120.037	88.1726	38.4189	59.7842	63.2301	74.259	83.595	78.2638	88.7891	81.6383	78.4817	246.5	213.589	220.682	0.000196662	0.422495
FBgn0030734	CG9911	323.997	337.958	353.177	147.527	49.7831	144.266	73.7568	74.7034	13.9017	206.149	175.229	139.912	133.849	151.548	151.892	141	136.998	142.933	136.013	116.452	128.697	156.74	148.502	140.871	0.000199846	0.159942
FBgn0035853	UbcE2M	333.827	327.809	286.364	128.598	104.202	112.599	92.1963	78.5043	54.7851	1505.9	1638.53	1426.37	90.0698	99.6724	111.942	114.19	101.53	113.985	119.26	119.76	118.052	128.934	121.126	130.613	0.000200658	0.237854
FBgn0039183	Dis3	19.5366	22.4672	20.7453	5.68665	7.46715	15.2261	4.112	5.18509	6.9734	87.1633	82.4596	97.0842	26.957	31.6167	33.7574	37.2715	38.6556	39.6212	39.3267	38.331	35.6318	65.8946	62.2159	62.1074	0.000201838	0.259294
FBgn0027338	Kap-alpha3	229.019	249.522	236.143	115.795	123.764	113.516	63.3889	76.9466	34.4522	1065.16	1201.15	1354.28	106.547	181.355	187.42	217.525	250.608	236.605	267.131	230.668	228.917	601.77	623.541	588.141	0.00020521	0.244566
FBgn0013276	Hsp70Ab	57.1148	71.8623	63.9294	28.0138	37.8333	30.7999	9.71156	7.62733	8.70442	88.954	78.2879	174.545	20.6449	27.5672	30.5149	26.0468	27.4529	29.0377	25.7115	22.7508	19.4172	55.186	57.5312	50.946	0.000206716	0.135005
FBgn0035997	phol	71.6848	83.4252	81.9652	51.4419	66.8238	54.439	25.7601	25.0771	18.6435	52.9726	56.5963	46.4693	49.2923	64.4028	68.7368	70.1032	83.9896	83.8383	88.9358	74.8134	76.471	191.098	201.698	188.094	0.000208963	0.293074
FBgn0030833	CG8915	34.1399	37.1035	36.3405	22.9279	19.6881	22.2647	16.4119	12.5453	11.5025	56.609	59.7577	67.751	18.2529	27.7142	30.4881	28.8966	32.3317	31.5949	32.0814	28.9585	32.2284	73.7923	72.0458	68.8471	0.000209735	0.376076
FBgn0030049	Trf4-1	94.5189	95.4264	85.1903	32.7056	48.734	45.1895	23.2775	34.8053	23.561	383.685	345.799	361.3	54.8246	64.477	65.7082	60.7041	75.8328	72.1829	88.7279	69.1311	69.1823	167.085	180.278	173.656	0.000210132	0.29674
FBgn0010097	gammaTub37C	839.942	810.628	790.669	428.145	377.355	388.197	382.893	272.981	273.954	993.425	905.2	708.199	240.683	253.773	243.468	184.551	173.943	175.528	177.848	168.5	169.75	197.12	201.866	200.76	0.000210942	0.380884
FBgn0029174	Fkbp59	298.027	324.955	364.038	182.066	184.16	195.688	83.2993	83.3382	81.4574	914.32	846.159	697.851	356.802	342.145	351.728	347.164	357.03	351.857	351.398	347.962	315.675	294.223	289.658	270.666	0.000211672	0.251357
FBgn0032453	CG6180	1301.15	1114.31	1334.85	575.754	479.018	421.001	335.282	367.069	295.59	1870.97	1640.95	1610.89	352.853	338.713	326.658	324.061	311.858	311.074	338.457	328.664	351.141	264.565	256.791	267.73	0.000214249	0.266096
FBgn0033179	p47	279.416	245.27	229.862	150.581	74.8679	101.202	57.7562	61.8107	46.6837	366.14	304.544	295.121	157.76	155.784	151.858	146.889	144.263	150.48	147.222	149.189	157.499	178.682	180.794	183.241	0.000214908	0.220332
FBgn0266667	Exo70	47.3748	44.4934	47.2454	21.3038	24.0412	23.2726	12.1441	13.0328	4.55307	16.1533	14.1663	10.0262	26.208	27.5781	28.0114	24.8291	25.3953	26.7662	22.634	20.024	22.5359	35.6281	41.4237	36.1511	0.000215159	0.21371
FBgn0029979	mahe	83.9781	80.6076	90.0061	49.1683	58.224	50.3986	38.4073	40.5579	45.1964	156.185	153.811	136.973	39.16	55.0732	56.945	82.3023	93.1106	90.3741	113.127	93.1994	96.3612	273.19	250.074	240.537	0.000215911	0.487689
FBgn0039875	sip3	118.125	119.136	136.355	73.1594	67.757	73.845	37.6668	40.0945	46.6966	230.562	232.398	247.627	22.8505	25.3198	22.9484	22.4355	24.6999	25.2164	24.215	20.3275	22.0673	51.3816	45.8959	48.8516	0.000216407	0.333118
FBgn0001308	Khc	350.18	330.66	371.463	212.177	243.694	201.843	185.081	161.791	180.256	631.423	551.883	464.925	124.326	142.024	149.597	110.52	119.535	108.974	103.112	92.2778	88.3542	198.507	174.227	167.007	0.000219569	0.500928
FBgn0004066	Prosalpha4	875.468	746.482	909.035	313.246	325.271	339.687	214.5	196.226	171.62	3112.65	2758.5	3092.75	301.857	299.793	308.149	340.496	327.768	338.22	360.668	335.49	336.383	414.481	393.361	427.637	0.000220306	0.230087
FBgn0260759	CG42557	27.2708	31.1334	23.6771	0	0	11.107	0	0	0	85.4149	86.9352	79.4498	11.7877	20.1305	24.412	22.9397	25.9751	26.9796	32.4187	26.6196	28.2046	53.818	53.8778	51.8972	0.000220829	0
FBgn0000416	Sap-r	1578.8	1449.21	1620.98	944.998	950.128	960.369	780.312	664.829	641.158	2891.62	2142.73	1758.5	430.854	439.267	414.962	329.77	308.507	295.944	261.291	251.578	240.131	396.385	287.708	322.045	0.000220878	0.448764
FBgn0010217	ATPsynbeta	3925.65	3359.06	3569.07	1940.25	1890.47	1855.43	1525.72	1403.87	1479.07	6805.14	7498.09	7248.54	1613.22	1571.58	1588.76	1358.35	1360.83	1306.87	1186.24	1221.63	1155.18	1071.36	919.181	965.45	0.000221295	0.406186
FBgn0014868	Ost48	144.026	129.261	153.202	55.7312	64.6039	55.5163	52.3077	44.7472	50.2863	636.698	564.483	547.309	110.788	109.999	111.506	108.007	104.647	106.039	109.359	102.785	109.658	117.351	122.297	131.695	0.000221901	0.345475
FBgn0017545	RpS3A	2464.37	2297.52	2151.15	1249.41	1126.01	1086.08	718.3	920.011	649.863	4760.29	5541.62	4980.7	7532.26	7503.61	7446.99	6777.69	6429.48	5992.59	5506.89	5801.82	6783.33	3713.48	3471.1	3405.12	0.000222218	0.330993
FBgn0014857	His3.3A	1906.9	1678.52	1854.24	891.61	993.317	1071.2	658.882	493.342	401.72	4412.42	3641.88	4283.91	344.347	353.498	327.374	332.3	333.524	355.259	323.423	345.486	349.576	338.949	380.637	375.022	0.000222587	0.28567
FBgn0004432	Cyp1	4909.08	4426.8	5313.59	2732.51	2720.25	2739	1633.77	1661.2	1631.68	21116.7	18788.7	18301.3	2414.8	2251.64	2280.2	2650.07	2401.59	2524.74	2681.42	2594.92	2686.13	2159.02	2198.98	2270.82	0.000225881	0.336302
FBgn0029676	HIP-R	933.759	995.269	1169.44	660.453	585.224	585.072	153.367	123.477	115.444	1240.81	1078.25	2066.38	232.004	245.272	234.069	212.268	215.211	215.01	208.877	196.218	191.562	212.275	182.971	197.788	0.000227412	0.126607
FBgn0031149	Stt3A	243.471	220.585	234.276	158.164	131.365	143.989	121.138	102.496	96.1862	890.185	755.39	726.311	93.1718	104.082	105.369	99.8726	102.043	103.157	110.208	102.88	97.6559	143.142	126.264	137.988	0.000228582	0.457979
FBgn0052823	Sdic3	173.99	153.351	197.081	91.0109	102.623	101.744	16.497	15.9308	13.946	92.3983	72.0565	306.097	42.1014	41.9359	40.8147	37.6381	38.5207	20.4819	39.1824	32.0295	33.9225	40.532	39.7792	43.6955	0.000228879	0.0884283
FBgn0005696	DNApol-alpha73	147.107	126.532	138.736	83.9857	93.796	78.9652	46.4811	47.6217	57.4049	147.444	142.697	115.162	87.8571	106.332	105.078	99.7558	109.041	104.306	103.79	93.5887	94.0853	113.413	129.462	122.788	0.00022911	0.367402
FBgn0028382	cyp33	65.6408	52.6944	55.326	19.6193	19.1048	10.6417	4.77276	5.67819	0	134.481	131.184	149.242	43.5461	46.9006	47.5795	52.7644	53.3373	56.1931	46.5434	51.6145	47.0161	57.0135	48.0928	47.4743	0.000229978	0.0601801
FBgn0042125	CG18787	411.287	398.499	329.812	195.621	160.759	137.292	66.059	50.7017	53.4893	125.58	148.718	302.681	64.8018	84.0844	80.5682	75.1785	76.7315	71.9547	81.7412	64.8398	70.2082	150.574	145.861	141.319	0.000231564	0.149395
FBgn0032728	Tango6	35.1072	40.1469	40.9335	19.0814	18.9544	16.4838	10.0661	12.1869	7.34837	32.7281	40.787	43.1869	15.0496	19.3289	19.9992	18.2477	19.2545	17.4845	15.314	13.3811	13.3429	33.5341	29.8762	26.4219	0.000232228	0.254772
FBgn0031670	SelT	213.866	222.141	197.394	143.976	82.1111	126.34	58.6842	78.6974	86.0196	2193.27	2033.12	2316.39	124.846	133.681	139.539	167.022	157.718	158.023	187.342	183.696	184.192	148.093	123.92	136.482	0.000236023	0.352701
FBgn0036745	CG7484	243.946	255.743	275.095	191.412	113.213	113.342	93.4609	81.3575	54.9772	623.022	624.71	696.216	57.7066	62.3951	63.6978	62.0737	60.9137	60.6979	48.5401	49.7444	61.9723	73.029	74.9315	69.6435	0.000236301	0.296593
FBgn0029879	APC7	291.005	247.732	275.389	175.741	144.86	138.748	90.4267	96.0708	70.3032	67.4206	53.7751	56.8741	205.3	196.802	201.977	221.269	218.012	219.669	199.232	203.72	195.653	161.977	178.991	192.529	0.000236354	0.315431
FBgn0035205	Ctr9	45.2756	54.112	53.3332	25.6055	29.3096	28.8145	7.23807	12.6957	7.33462	65.0148	54.863	50.6189	54.0236	68.6205	65.8695	65.3649	67.6751	65.4666	56.1818	54.8122	51.5477	120.154	111.705	110.103	0.000237226	0.178551
FBgn0028693	Rpn12	1335.4	1127.42	1304.21	719.496	715.368	696.692	446.687	425.457	451.917	4804.86	4290.44	4202.9	325.432	365.54	352.557	358.136	351.859	357.745	371.633	377.81	358.132	356.926	306.382	329.859	0.000237241	0.351487
FBgn0033906	ReepB	914.476	890.571	893.846	558.167	634.296	575.378	523.181	412.212	425.431	1002.71	1065.13	944.974	201.719	202.225	216.021	169.07	168.744	170.275	160.882	163.905	160.549	199.124	215.487	208.244	0.000238327	0.504216
FBgn0032450	CG5776	38.0303	38.8278	39.6846	17.5567	22.9051	23.9512	12.2979	13.8598	6.65325	2.94596	7.7377	4.31779	38.0838	45.4312	44.3351	49.0165	48.5333	54.0215	53.4843	44.4118	44.7821	102.214	95.5518	91.6198	0.00023872	0.281536
FBgn0051716	Cnot4	153.675	187.887	164.274	77.1733	86.989	85.8489	27.1879	40.9297	32.9617	161.569	167.123	207.764	89.0327	123.308	129.441	122.12	139.968	136.459	136.332	107.886	112.096	284.423	247.869	235.793	0.000242061	0.199827
FBgn0038805	TFAM	184.426	195.64	198.415	93.7524	78.7524	113.818	50.5254	81.7308	56.557	815.209	810.153	778.944	102.036	115.499	121.705	128.612	128.747	131.79	150.317	132.662	141.578	206.217	197.34	203.263	0.000242655	0.326395
FBgn0029686	Glos	19.5363	15.8715	19.1416	24.7744	11.8143	16.1255	3.96508	3.61133	3.61832	45.7736	43.7509	96.5781	10.2283	15.9282	17.9859	19.1556	23.2205	21.4823	21.9906	19.8462	19.8183	55.4048	48.6752	59.6647	0.00024465	0.205222
FBgn0001612	Grip91	111.953	111.845	130.503	36.9387	53.0932	54.7629	31.9363	17.4288	18.6505	102.268	101.584	79.0749	55.443	63.3346	59.2971	46.4509	49.8849	45.1116	43.8253	38.0582	38.9196	110.339	93.2623	93.8986	0.000249736	0.191972
FBgn0028694	Rpn11	650.733	659.917	664.958	360.158	246.4	349.403	208.895	230.619	316.315	1520.68	1329.88	1006.57	201.045	239	236.004	238.979	257.971	248.485	262.936	248.162	248.957	316.396	345.325	332.926	0.00025092	0.38258
FBgn0001105	Gbeta13F	490.235	455.068	491.938	378.207	364.243	365.28	268.552	219.637	224.777	1636.33	1468.16	1453.47	146.293	185.373	179.841	180.147	180.794	183.736	201.397	168.167	177.405	263.942	278.757	283.849	0.000250955	0.496065
FBgn0029709	CHOp24	155.301	131.016	159.951	65.3469	39.5866	64.5442	0	21.7682	0	646.766	478.479	606.533	105.936	110.244	113.665	123.285	115.653	113.882	136.781	123.741	127.39	125.67	117.825	121.549	0.000253909	0.0487782
FBgn0017550	Rga	124.989	124.515	131.996	99.0026	93.8448	97.9615	49.0208	44.8904	27.3199	393.548	346.654	393.752	65.8048	79.8044	80.1994	71.929	77.1428	80.4764	74.6455	64.2785	67.9764	122.213	107.551	103.689	0.000254557	0.317775
FBgn0003074	Pgi	317.58	284.996	302.24	152.902	151.326	154.719	129.703	85.9003	97.6242	543.957	416.915	297.451	231.985	245.437	251.517	247.51	249.286	263.312	257.711	247.205	253.054	293.903	299.387	306.949	0.000256637	0.346179
FBgn0037794	CG6254	21.948	23.6146	24.1807	13.236	7.97739	9.78154	3.54196	5.162	0	45.9575	66.4355	60.1729	17.6274	24.9242	25.7964	20.6092	22.686	19.7569	21.8777	18.1076	17.7742	31.8227	31.2434	27.6947	0.000257453	0.1248
FBgn0031703	CG12512	20.912	22.4654	20.7889	6.50506	7.67309	15.4582	8.92864	7.02592	10.0827	33.7297	35.1874	27.2269	9.53636	9.63625	11.6187	8.75222	8.48467	10.8569	10.2731	9.53388	7.62621	18.0191	14.4981	15.2268	0.000259099	0.405777
FBgn0002641	mal	25.413	28.6982	28.6064	13.5504	4.92221	9.83793	7.95322	4.93289	9.1633	55.037	42.8179	53.2122	19.6547	24.4085	26.3851	28.8126	29.0057	28.0737	32.5236	26.9922	26.523	61.383	61.1161	55.611	0.000259374	0.266563
FBgn0035947	Srp68	319.367	295.931	259.958	124.756	125.227	117.228	63.6987	62.2989	35.8296	52.1049	53.1959	47.5262	107.612	116.848	120.441	98.4938	104.149	101.846	89.6684	93.8949	89.7426	139.651	149.042	145.719	0.000260073	0.184891
FBgn0026149	BCL7-like	106.291	107.865	108.493	55.081	62.3315	63.8297	86.9561	90.1119	84.8504	891.807	930.778	814.789	46.0705	61.6608	60.5597	71.1102	76.3556	83.5419	88.7768	83.086	71.168	90.017	113.697	112.972	0.000261601	0.811775
FBgn0022069	Nnp-1	163.153	170.925	164.527	116.166	126.592	98.1649	86.0812	97.9463	77.0465	609.219	669.509	617.39	89.2902	108.736	110.732	109.368	113.482	105.443	101.778	97.3731	87.9367	117.338	106.506	120.866	0.000261994	0.523608
FBgn0064225	RpL5	838.135	779.343	755.6	460.666	524.519	449.685	445.077	382.084	386.758	735.964	881.265	764.166	7274.46	6852	6882.04	7065.36	6817.65	6650.45	6436.19	6963.84	6912.81	2699.34	2801.04	2830.45	0.000263871	0.511537
FBgn0037749	CG9471	88.827	107.84	106.412	33.2151	37.6605	31.359	25.2474	27.4128	26.8992	651.887	597.396	574.844	58.7857	65.3175	60.5065	77.2329	64.6557	69.4106	68.9912	72.3834	72.8756	85.3007	77.1496	81.6057	0.000266036	0.262504
FBgn0035600	Cyt-c1	257.629	236.652	259.617	115.853	111.428	149.587	98.7818	112.495	76.3386	2038.6	1848.19	1939.21	194.901	218.705	219.249	227.642	238.51	239.084	245.251	238.546	235.894	249.521	235.837	258.116	0.000267657	0.381504
FBgn0002707	mei-9	49.3273	46.0849	51.4128	29.7346	28.9096	26.5307	28.4375	25.2108	27.4087	93.0325	89.454	85.0219	27.0498	30.8072	31.3595	25.4756	28.4812	27.1887	26.235	23.7021	24.1361	38.9656	33.638	32.0335	0.000271721	0.552065
FBgn0036509	CG7739	131.225	144.654	124.337	83.1745	71.4263	60.3637	59.628	52.5655	50.5049	338.686	338.639	318.981	46.2795	43.2301	42.3868	28.6816	30.8098	28.4838	25.3699	25.2355	24.7097	58.2983	42.9242	46.5885	0.000272577	0.406527
FBgn0029970	Nek2	129.284	126.413	128.427	67.3762	83.7645	67.2035	54.9384	43.9539	30.7035	68.1769	64.4056	59.0928	54.2561	58.7787	58.4058	47.3578	50.2939	50.7029	50.3705	45.8022	45.0746	82.2743	78.4427	77.6295	0.000274516	0.33738
FBgn0024920	Ts	238.774	248.505	251.409	109.759	110.7	122.64	124.382	86.0666	106.273	754.918	770.108	635.618	84.2344	97.142	100.998	101.076	105.138	103.047	109.736	100.489	107.584	106.056	125.686	112.189	0.000275125	0.428761
FBgn0016691	ATPsynO	792.756	661.177	787.288	349.409	346.159	344.102	226.374	210.939	236.903	2787.25	2773.16	2898.88	370.135	345.537	366.968	324.935	307.853	328.998	329.36	330.6	313.683	359.549	362.135	404.935	0.000279062	0.300825
FBgn0036689	CG7730	199.839	207.337	219.153	120.046	112.995	129.8	93.902	93.2084	67.4714	63.0518	65.4937	66.1893	86.2231	90.4982	89.5738	77.0102	75.7279	80.5608	70.106	70.7652	67.568	105.511	110.127	104.617	0.000279517	0.406467
FBgn0028968	gammaCOP	247.241	230.858	239.982	130.909	156.315	166.053	127.517	105.7	93.9044	219.807	190.839	160.822	98.5425	97.3044	101.234	87.0958	88.2701	99.1865	87.0158	84.9374	78.3352	93.9125	83.006	83.813	0.000283165	0.45555
FBgn0000996	dup	662.035	699.293	678.954	534.661	554.93	539.752	485.489	433.983	447.101	1598.3	1602.72	1552.47	163.408	189.096	196.408	187.395	190.623	192.169	174.035	164.541	163.865	211.213	218.684	216.099	0.00028357	0.669796
FBgn0034035	CG8207	62.9716	58.0122	60.3167	29.3493	46.239	38.9639	23.8945	22.706	14.1989	147.146	152.229	132.323	22.4729	27.4855	25.5889	22.5463	24.4704	21.3284	29.2884	25.7422	23.4269	35.6368	31.6236	31.3771	0.00028471	0.335351
FBgn0033005	CG3107	21.3177	24.3585	22.0066	5.15653	1.32863	3.92958	4.85159	2.8194	0	70.396	114.674	133.251	60.4185	86.9332	92.3204	90.6979	100.678	98.6416	99.1412	86.8948	79.87	269.856	223.971	195.626	0.000285684	0.113337
FBgn0033897	Rcd1	64.2893	68.6576	60.93	44.9999	43.4651	34.1238	19.2904	27.0261	17.7598	157.542	176.834	178.946	62.6571	82.631	86.3698	81.2427	96.2035	94.0324	81.5091	78.4628	78.1438	179.682	176.13	171.688	0.000286041	0.330499
FBgn0262619	DNAlig1	165.89	201.339	202.763	68.1999	72.2161	87.2351	47.6782	46.523	45.2696	108.46	93.983	85.7567	80.007	89.4893	91.311	76.0767	72.8837	70.6914	64.2323	65.8537	64.1056	110.588	104.663	99.1685	0.0002876	0.244689
FBgn0030813	CG4949	170.543	137.133	150.409	55.8563	97.4588	66.5688	23.0595	33.1503	33.9483	251.601	353.927	380.487	91.7332	89.7461	98.0552	106.677	110.505	109.411	135.914	109.433	110.775	175.615	146.329	144.353	0.000287671	0.196816
FBgn0038577	CG12321	124.283	105.795	122.907	46.8932	54.8043	55.8229	34.1975	36.1798	44.2476	209.837	186.497	152.408	207.28	166.856	165.124	133.381	117.543	113.028	129.257	102.142	114.668	127.925	133.173	117.146	0.000288521	0.32473
FBgn0029999	CG1575	126.045	118.057	138.952	36.2869	48.6554	55.0623	43.8882	35.0036	48.0259	85.464	97.9754	68.2295	50.9037	57.9479	56.6484	50.6845	54.3853	51.8266	55.6084	53.1638	47.5159	71.231	66.5166	65.0291	0.000289266	0.331331
FBgn0037481	MAGE	199.839	184.264	191.472	144.683	77.0552	86.3017	53.192	84.9472	72.1902	387.706	441.88	393.481	56.5178	56.5552	56.0959	48.8947	54.4105	50.3743	52.8839	51.764	53.9286	81.0237	85.202	84.9094	0.000289339	0.365425
FBgn0058045	CG40045	852.131	992.549	954.448	397.13	234.98	320.117	177.521	298.537	156.986	1733.76	1859.99	1600.42	709.414	744.841	763.253	768.463	774.014	731.336	728.149	697.153	642.518	1299.42	1161.48	1010.03	0.000289639	0.226158
FBgn0010173	RpA-70	721.118	707.465	611.044	347.658	384.029	366.232	268.479	271.305	268.712	469.012	516.304	367.298	210.981	258.127	257.022	251.559	252.282	247.335	258.698	227.49	228.542	363.042	366.32	337.464	0.000291068	0.396394
FBgn0038271	UQCR-C1	494.299	419.867	491.208	248.329	274.461	269.437	177.176	145.636	161.875	2061.57	1659.64	1466.37	327.826	324.316	321.551	315.088	324.222	326.634	299.821	314.166	310.17	288.263	289.851	299.548	0.000293134	0.344881
FBgn0053129	CG33129	883.892	774.073	903.498	368.965	339.898	333.177	58.7169	204.728	57.0258	34.3379	37.9891	19.263	226.072	294.199	317.475	341.983	341.839	352.391	363.367	344.482	341.712	596.747	590.306	598.766	0.000296781	0.125112
FBgn0010416	TH1	76.9522	92.7309	90.7708	32.4959	30.7319	34.9467	19.7821	20.0786	10.0081	326.561	322.593	275.292	42.8614	53.9811	54.2323	58.0153	57.4876	60.59	57.2165	52.3116	49.1256	82.7241	82.0954	87.3199	0.000298668	0.191469
FBgn0033482	CG1371	171.837	166.346	190.425	88.8455	88.8747	88.9388	67.5017	63.19	45.0517	338.748	259.126	245.625	72.5132	74.2608	76.4265	57.8168	63.7932	60.3547	58.8675	54.128	52.1511	114.336	89.5877	87.7709	0.000301205	0.332464
FBgn0038535	alt	599.036	627.559	712.06	345.881	367.47	339.541	244.999	221.329	245.347	1143.75	858.311	878.753	214.245	243.253	242.506	203.59	210.429	212.607	190.833	175.307	167.47	287.505	243.862	256.125	0.000301665	0.367097
FBgn0263667	Lpt	31.9196	30.5743	26.3957	13.9618	18.6519	15.1975	10.2523	8.61881	8.66285	31.6327	33.1622	27.664	21.0558	24.4904	25.3691	22.9971	23.909	23.7503	22.5721	20.8068	20.4223	42.837	37.9895	37.0906	0.000304956	0.309755
FBgn0037702	CG8176	9.4878	11.387	11.1322	6.59694	8.31277	6.8062	3.20849	2.50024	3.39216	165.798	192.599	226.322	14.943	26.1162	27.2784	40.8968	45.438	46.8159	56.0944	44.0457	47.2488	127.007	116.31	115.674	0.000308362	0.284341
FBgn0036893	PIG-F	201.673	184.972	213.148	151.558	112.382	127.787	87.3398	92.1914	101.097	150.43	146.898	126.016	33.6633	42.5936	44.5278	38.7602	44.4341	43.5344	49.5389	47.5784	52.0509	66.3674	72.4829	63.4525	0.000308531	0.467876
FBgn0010406	RNaseX25	103.404	101.964	111.688	59.7084	47.8312	50.6652	43.4225	28.5965	43.4071	341.259	355.648	388.623	45.3138	47.2893	51.2799	57.2194	62.4211	58.6357	63.8665	65.4178	64.5409	100.537	99.7995	95.3897	0.000315748	0.364055
FBgn0024371	E2f2	57.4756	70.0415	69.6151	6.74123	24.1933	30.8116	16.9827	13.6327	17.3954	416.927	448.555	385.514	70.0769	97.5684	99.1287	109.924	121.375	117.709	131.364	114.268	113.724	201.303	200.198	192.497	0.000316482	0.243546
FBgn0026679	IntS4	69.1411	73.4186	74.1402	53.6007	67.211	56.4561	48.2995	44.3342	42.261	238.085	210.216	180.39	52.2867	49.7428	52.2639	52.6512	52.5578	54.5835	55.2795	48.3369	52.1881	63.3734	52.437	54.6092	0.000320734	0.622495
FBgn0032845	CG10747	107.385	93.3271	110.739	58.7419	37.1887	43.6089	40.8269	33.0574	37.0848	28.9141	29.8141	19.8429	45.2537	32.106	31.8061	17.4512	15.5207	16.1058	12.4694	9.68791	9.2764	14.1156	19.9384	17.3002	0.000320989	0.356297
FBgn0261394	Prosalpha3	631.985	739.64	741.052	318.435	325.332	370.792	258.596	229.001	188.107	3637.99	3533.44	3012.86	384.743	397.405	396.057	375.651	398.61	405.191	429.646	387.997	387.962	429.247	403.593	438.621	0.000321891	0.319833
FBgn0037778	mtTFB2	95.6035	79.9939	86.5452	39.206	20.1527	39.9723	18.9154	23.5668	9.81346	78.525	84.2146	84.0652	26.0174	29.6891	29.9588	20.618	20.7744	19.8759	17.8675	19.1917	18.2982	31.7061	32.6194	28.5892	0.000322912	0.199493
FBgn0033990	CG10265	81.0917	83.3117	101.402	22.6615	27.5578	44.1262	15.3302	12.0087	13.8195	65.7012	65.644	73.1594	31.6671	44.4246	43.9301	47.0128	53.1096	48.8847	42.1148	49.5048	43.9744	54.6395	68.4231	61.9135	0.000324812	0.154844
FBgn0040078	pont	233.387	243.737	272.582	153.089	160.115	147.222	96.5714	105.652	82.7829	1264.36	1145.48	1124.12	91.6919	97.9994	98.1849	104.609	105.118	111.967	112.76	98.2553	104.891	116.457	105.207	114.251	0.000327449	0.380157
FBgn0001248	Idh	1392.04	1262.88	1550.31	747.557	692.218	665.606	416.132	461.199	412.44	4375.52	3627.23	2667.46	413.9	459.125	448.464	425.957	420.078	436.077	389.015	383.058	390.76	507.874	518.315	525.787	0.000327568	0.306706
FBgn0032455	Pih1D1	95.8794	94.9132	77.9254	31.7716	18.7804	55.5475	21.7396	14.1296	18.2915	160.509	172.07	154.332	93.4676	101.039	106.82	109.281	117.1	125.492	111.644	111.028	107.626	159.767	143.445	134.011	0.000328996	0.201552
FBgn0036258	eIF3l	110.11	109.392	110.065	78.9284	103.867	79.342	77.8018	69.5486	66.578	548.107	623.232	536.726	386.966	405.705	419.332	412.376	406.412	396.493	353.154	375.58	381.226	245.735	267.219	265.757	0.00033165	0.649119
FBgn0004363	porin	1159.08	1131.44	1314.02	691.797	634.364	614.624	511.7	560.972	519.833	11614.1	9932.64	10279.7	831.528	954.666	969.479	1073	1125.47	1106.62	1189.92	1138.81	1124.23	1198.42	1186.82	1203.62	0.000337602	0.441805
FBgn0284256	bsf	26.2575	24.1486	24.3183	13.7026	12.5925	13.1646	11.3515	8.51589	7.22202	59.9235	58.6433	42.7818	31.7984	37.7097	40.2611	45.4862	48.1622	46.586	48.4985	42.1752	39.4604	87.8039	73.699	68.5722	0.000339333	0.362524
FBgn0028515	EndoGI	126.75	131.314	145.376	98.7531	70.2983	70.8474	67.5731	66.9553	59.866	325.617	280.321	242.062	49.0308	65.7171	69.2568	65.1791	60.7946	62.6484	73.1241	60.7004	61.0703	90.2314	76.1668	67.1271	0.00034071	0.481842
FBgn0027081	ThrRS	369.438	331.338	368.946	215.106	174.367	191.397	162.182	136.739	111.429	639.9	594.179	580.866	189.998	180.367	180.066	155.187	160.765	157.468	143.642	132.882	133.28	191.236	190.195	193.209	0.000341601	0.383605
FBgn0025815	Mcm6	227.243	200.388	241.477	107.088	116.86	115.756	69.3139	72.0357	85.0206	422.566	384.143	311.3	95.9899	113.667	111.001	107.515	115.24	109.858	116.768	110.307	105.921	202.478	193.23	184.572	0.000341729	0.338317
FBgn0027783	SMC2	137.894	160.419	140.166	100.554	98.7969	97.1223	63.9987	59.4136	64.6763	186.848	188.272	183.724	67.9458	72.552	71.8398	60.0916	64.094	54.1268	51.3825	46.7659	42.7308	101.432	87.2646	82.5348	0.000342612	0.428957
FBgn0034310	Nup75	82.998	101.791	98.4188	31.383	36.7856	40.806	12.7528	24.4607	17.7986	268.193	257.216	217.801	55.5204	70.1031	71.2928	64.733	69.0249	67.6879	67.9681	59.3349	60.2426	89.1479	82.4126	84.3246	0.000344263	0.194246
FBgn0035524	CG11583	156.277	162.859	151.407	85.9764	71.4523	75.4261	65.712	60.9148	38.6317	178.784	188.582	217.445	96.2384	99.7141	110.834	97.504	101.14	108.025	103.421	90.7241	85.8923	124.033	141.923	133.039	0.000345503	0.351208
FBgn0034345	CG5174	307.665	312.156	336.154	176.992	77.4666	190.254	47.5686	78.2651	0	911.812	1410.66	1705.67	195.788	177.335	175.003	178.835	189.101	208.083	230.583	163.754	190.942	252.728	246.392	219.792	0.000346031	0.131629
FBgn0262937	Rabex-5	41.7708	45.1257	43.4399	20.7912	22.3157	18.8619	12.4322	15.2136	20.072	22.5242	19.0237	16.1547	27.4045	28.9323	27.7281	29.8054	27.9516	27.6119	28.9586	27.6737	28.7506	51.1237	53.9029	48.7947	0.000347489	0.366113
FBgn0033089	CG17266	239.996	255.521	221.665	85.9965	101.991	50.9745	80.3484	84.6869	108.449	461.094	480.477	451.313	45.2107	51.0644	61.6229	58.8202	50.4064	57.8235	44.77	58.4142	56.63	61.8045	65.8502	70.0884	0.000352398	0.381332
FBgn0002787	Rpn8	410.877	425.786	494.49	309.236	243.256	263.093	144.185	146.888	158.07	1435.54	1228.2	994.836	170.643	191.433	208.239	186.817	202.48	182.331	169.937	164.329	151.624	240.305	268.996	259.373	0.000353696	0.337409
FBgn0036117	CG6321	12.9945	15.3312	17.7203	3.88949	5.1078	1.38728	0	0	0	11.2332	13.71	20.6377	23.9743	22.7197	23.3034	28.0394	31.2915	25.5967	28.7965	31.6391	30.8669	59.7789	52.6235	52.8646	0.000355556	0
FBgn0284255	Arpc4	260.5	240.283	225.61	115.768	101.461	108.152	122.508	113.762	103.978	647.354	678.829	789.801	84.0946	81.8091	82.2558	89.5017	84.8864	84.176	68.5745	83.9333	84.6556	84.062	74.6187	78.9313	0.000355804	0.468407
FBgn0002022	Catsup	350.91	297.531	294.41	128.038	136.906	143.759	96.5399	84.636	106.709	553.229	519.1	497.441	106.704	110.138	115.981	93.047	91.7016	94.6783	91.4249	87.8992	81.9365	95.3916	86.8921	95.1649	0.000356115	0.305334
FBgn0037890	CG17734	467.682	498.077	390.397	155.103	276.567	388.277	47.4232	82.8819	31.6002	2160.69	2202.38	1988.97	168.926	157.941	189.748	190.342	184.806	190.803	176.401	187.106	197.842	256.918	255.515	243.893	0.000358445	0.119385
FBgn0034936	Stoml2	154.227	156.776	192.235	73.3636	71.7952	52.2175	16.7742	29.6252	14.5245	76.5031	88.8776	101.798	74.3107	92.5496	87.8959	80.7989	82.7835	87.057	94.3656	82.7351	88.2163	115.954	118.455	110.547	0.000359044	0.121064
FBgn0036448	mop	182.781	212.265	190.523	119.162	116.595	114.67	87.4991	67.6387	74.6802	154.788	154.194	135.945	85.8816	88.8778	84.3481	55.0203	53.3937	57.926	43.7456	35.5351	37.4122	99.9852	80.4728	79.1712	0.000359233	0.39247
FBgn0001142	Gs1	483.575	441.162	519.757	291.632	288.912	254.525	199.875	161.039	200.862	743.869	671.595	722.024	168.611	205.433	205.198	241.605	266.322	257.964	277.248	255.657	263.906	404.559	467.893	462.015	0.000359417	0.388909
FBgn0033224	Nop17l	169.379	187.938	185.62	134.679	114.792	110.538	77.4918	56.3869	81.5056	46.1628	57.6105	44.4423	72.3848	78.7442	79.8845	71.9649	79.1601	80.2724	75.6655	69.2617	69.6463	134.915	129.657	127.611	0.000359973	0.396702
FBgn0033475	CG12129	231.966	219.226	194.755	113.257	90.215	128.438	50.4176	74.64	72.0032	448.569	453.553	559.736	98.1509	115.502	123.502	118.039	133.139	129.89	130.537	123.495	114.207	158.85	159.899	149.471	0.000360272	0.305073
FBgn0042127	CG18789	358.852	380.123	292.682	176.109	144.336	123.076	54.2655	42.3632	41.7935	111.678	135.331	274.43	54.7643	70.8776	70.927	66.3343	65.9036	64.2709	70.8083	56.647	62.2046	135.075	126.977	125.046	0.000364811	0.134175
FBgn0038149	GILT1	741.596	612.01	714.546	336.633	348.711	396.622	212.653	245.942	194.552	2212.98	2105.16	1983.04	291.733	354.334	371.332	383.732	404.421	441.495	430.765	414.721	410.86	495.365	505.804	531.965	0.000366092	0.315812
FBgn0050443	Opbp	19.8963	26.4119	23.8964	3.43195	13.25	11.2425	0	2.20496	0	2.28729	4.54707	0	21.3628	19.1952	24.2881	24.2192	23.9655	23.5207	22.3351	21.4574	22.1504	38.6267	33.1639	34.9763	0.00036938	0.0314076
FBgn0261938	mtRNApol	26.0538	23.8093	23.6242	14.3322	12.956	13.3781	9.13467	10.8099	12.4343	69.1211	67.7854	65.2393	25.1387	26.1978	26.2357	26.3997	28.1227	26.6303	27.3973	25.5143	23.0179	45.489	36.5988	38.5995	0.000371419	0.440604
FBgn0035102	CG7049	69.2694	64.88	55.6703	13.5845	19.3496	28.6441	19.161	15.6032	15.345	114.552	108.958	115.906	30.0452	26.5061	24.8138	24.995	23.2218	28.3398	21.9849	26.275	21.4471	28.1009	26.7554	26.9653	0.000373501	0.263983
FBgn0052409	CG32409	129.255	136.043	135.886	52.8057	60.7254	77.9543	39.9346	48.4802	19.7524	319.094	349.399	380.927	56.4294	64.6293	65.9718	55.1406	59.9724	55.2274	63.3817	48.7086	53.7365	100.04	116.101	115.769	0.000375785	0.26962
FBgn0038760	MED25	67.1714	77.6574	65.2634	27.966	34.7983	44.1518	27.6061	24.4517	23.5929	88.6332	90.2121	93.0419	16.3654	21.3575	19.8742	13.0088	14.4879	14.5175	14.75	13.852	12.8675	23.6763	23.6719	23.7555	0.000376247	0.360083
FBgn0052672	Atg8a	435.358	419.822	383.398	253.706	207.186	176.62	190.099	168.651	134.163	3243.52	3412.07	3729.77	120.651	133.03	118.825	158.692	164.347	158.657	179.76	173.267	168.123	219.134	208.175	231.568	0.00037641	0.397967
FBgn0266673	Sec10	78.1465	88.9452	89.066	40.7483	45.2137	42.9636	16.3219	31.0578	22.9126	64.3171	75.0935	55.7156	24.358	32.3977	29.1223	28.0211	27.77	26.3553	25.6897	22.8916	21.6112	48.7875	43.2285	42.0936	0.000377368	0.274411
FBgn0034181	CG8963	423.694	467.308	501.929	289.198	248.17	272.529	196.142	208.69	177.168	1685.68	1521.86	1397.53	109.979	132.548	136.392	125.301	134.326	135.907	124.173	131.483	124.837	152.853	167.89	172.156	0.000378701	0.417824
FBgn0039765	mRpS18C	132.154	134.941	152.401	55.3957	66.252	42.8007	38.3983	34.0066	13.0653	118.194	179.54	123.551	13.6153	30.7302	28.4584	25.8214	25.3691	28.7412	28.3734	33.4239	32.5765	41.2683	42.5851	44.3153	0.000379177	0.203745
FBgn0033247	Nup44A	232.25	203.11	245.91	93.508	128.285	103.415	64.7738	65.0048	38.0068	527.465	429.645	419.454	64.3168	69.9699	77.1634	57.1211	50.5302	57.0232	54.4226	45.4919	44.2242	72.94	80.3803	81.3772	0.000380405	0.246283
FBgn0266668	Exo84	78.8679	70.9047	75.9015	66.8538	39.3241	47.2646	43.6717	36.6203	41.6288	40.3857	43.4516	39.8828	39.6551	39.4171	36.4445	31.116	28.0034	28.951	33.52	28.6443	26.7286	38.0272	40.4757	37.744	0.000380689	0.540252
FBgn0286027	Rnmt	89.1559	107.779	98.6122	45.4773	33.6486	49.2193	33.4195	36.5362	27.6567	401.297	410.265	451.521	44.1775	54.8428	58.3493	60.2275	59.0488	60.0318	65.0546	59.9609	59.6061	81.2893	66.4149	71.2002	0.000381728	0.330277
FBgn0034703	CG3045	49.7753	57.4648	54.4063	36.5275	33.6684	39.0186	27.7032	23.4802	23.5746	45.522	56.5762	67.0548	27.0904	28.6753	34.7055	27.5145	33.3267	31.8306	33.392	30.5594	28.1014	47.2602	49.8522	47.4919	0.000388345	0.462478
FBgn0039830	ATPsynC	3566.08	3656.36	3844.47	2801.51	2436.38	2370.91	2622.64	2608.68	2426.68	16694.8	16162.2	15143.2	2743.18	2755.78	2773.01	2913.16	2647.49	2729.06	3006.14	2928.82	2832.11	2739.04	2368.52	2559.84	0.000390828	0.691973
FBgn0031771	ND-51	122.132	128.926	120.596	77.4407	94.9607	79.3256	75.9777	62.6808	62.1775	1027.78	894.252	787.801	140.418	142.653	140.98	152.495	141.114	142.679	151.94	139.598	142.58	132.485	116.016	125.979	0.000393071	0.540385
FBgn0004362	HmgD	5551.66	5285.64	4352.49	2011.34	1865.21	1707.53	985.488	1130.81	873.642	8760.6	9911.71	10555.6	1011.34	1068.43	1093.7	1120	1142.79	1128.54	1225.51	1116.58	1110.93	1530.65	1636.24	1581.99	0.000394087	0.196839
FBgn0260456	CG4806	51.0107	60.8056	61.4488	12.7042	17.061	8.0881	10.0187	9.45331	0	99.7304	98.4457	115.92	23.5457	31.2921	35.1278	25.6494	32.0466	26.9422	27.4816	24.2	25.0607	61.68	63.9123	60.1415	0.000396757	0.112383
FBgn0025678	CaBP1	552.665	495.479	456.422	259.661	185.655	250.405	167.903	163.511	196.459	1727.11	1312.04	1223.64	140.319	148.644	138.705	132.181	140.204	138.313	141.733	138.566	133.02	150.295	130.264	144.115	0.000398362	0.350847
FBgn0270927	betaGlu	52.8954	43.1293	49.2735	31.0894	18.572	23.2889	16.7428	12.4363	13.4486	49.5531	54.3651	46.7415	19.4923	16.5809	17.2331	11.4538	14.7869	13.2935	12.0578	12.3217	12.1548	15.9735	13.7686	13.0402	0.000398797	0.293381
FBgn0286783	Etf-QO	274.427	238.016	281.16	116.722	153.775	152.236	111.892	87.5667	92.7444	436.983	369.518	304.458	88.0197	95.0173	93.1475	82.0687	77.17	75.5598	77.3323	73.2584	70.0966	88.6829	90.9753	88.1218	0.000399568	0.368198
FBgn0040080	pins	109.736	122.481	125.044	91.9886	82.0903	85.0469	59.31	50.4622	60.7225	302.684	276.295	292.67	54.1623	61.1367	59.8531	71.1069	74.2024	75.8866	86.7738	81.7486	78.5567	125.693	123.482	121.223	0.000404539	0.477227
FBgn0039465	Tsp97E	297.437	243.603	268.837	66.8783	107.613	160.903	82.3172	99.2934	77.5181	1194.37	1143.52	1080.17	54.7888	80.0093	75.29	74.5047	73.8774	94.2486	98.0081	76.1976	84.2881	143.841	133.367	139.008	0.000407175	0.319961
FBgn0028479	Mtpalpha	1199.79	1038.4	1033.04	623.59	567.83	536.203	475.191	392.367	452.921	1347.12	1151.66	858.732	343.094	320.067	312.424	273.484	271.517	261.067	268.081	252.861	243.295	255.34	240.073	242.214	0.000412598	0.403666
FBgn0030061	CG1785	225.713	233.408	273.263	93.6461	77.9653	114.808	74.9447	64.5781	83.3974	207.878	223.854	226.135	112.848	115.319	119.328	82.1388	89.2568	86.6165	77.1078	74.8924	73.1229	140.86	146.473	129.897	0.000415313	0.304376
FBgn0033886	Rpn13	837.919	693.464	846.969	377.398	376.944	344.217	231.005	261.628	213.64	990.226	843.302	757.654	218.338	237.633	236.181	204.204	200.394	217.222	183.473	193.572	193.826	229.617	261.35	257.101	0.000418853	0.296959
FBgn0025781	Cdc16	177.018	189.547	198.593	140.559	148.306	137.907	99.4946	75.3791	81.9518	332.452	362.628	338.025	52.2195	59.8737	59.988	48.1631	47.9983	49.607	52.4211	44.4049	45.1723	59.7228	57.5289	58.9401	0.000420221	0.454432
FBgn0032643	GCS2beta	530.538	430.727	507.731	208.082	188.476	201.127	126.773	101.845	153.297	762.569	534.35	453.521	157.323	159.835	157.955	124.168	127.74	121.771	105.135	110.354	105.668	136.527	128.855	137.916	0.000421763	0.259983
FBgn0000032	Acph-1	76.9795	82.9891	88.911	33.9121	36.7704	28.6843	13.6742	19.2913	0	71.6592	58.8034	83.1869	52.477	71.817	75.4586	69.6508	83.3674	81.074	82.948	81.1859	78.4866	149.269	169.253	166.196	0.000421857	0.132456
FBgn0037700	CG8149	323.545	395.446	356.069	218.98	189.75	199.099	131.672	132.803	137.26	985.629	973.465	1005.74	100.981	108.276	103.92	108.761	106.276	100.738	112.818	109.2	98.7753	109.749	106.666	107.303	0.000422848	0.373685
FBgn0264326	DNApol-epsilon255	36.6025	39.9938	33.0123	20.6299	17.3753	20.9344	12.5475	9.41068	7.60271	40.6945	39.0894	26.9992	27.1134	35.6127	36.1788	27.3182	28.8536	26.3111	27.5475	23.2448	23.1441	92.5159	76.2539	66.1856	0.000422978	0.269695
FBgn0033918	CG8531	25.2852	26.7901	27.9526	7.96737	4.52766	14.6596	6.53969	5.02843	0	39.5517	46.1129	45.6047	52.568	63.0522	71.1959	66.1284	73.4407	75.54	72.086	68.2207	73.2298	119.912	117.12	115.769	0.000424048	0.144551
FBgn0011020	Sas-4	51.1122	60.3414	56.6251	41.917	42.6636	29.6367	20.6819	20.7888	25.5923	103.041	88.9642	73.3705	37.677	48.1805	49.8155	50.6989	51.43	52.01	48.1853	44.7188	42.6061	88.4535	83.0407	74.8504	0.000424398	0.398998
FBgn0026479	Drp1	56.2466	63.6884	64.3166	13.7802	30.4379	39.2285	18.5978	15.5303	6.51712	278.257	222.388	206.256	80.0114	90.1801	94.9732	118.204	118.01	114.832	124.073	112.8	104.177	138.596	137.621	136.725	0.000425827	0.220596
FBgn0033635	Prip	210.221	170.389	219.826	53.2586	50.6635	94.7143	34.426	36.6656	22.4833	470.796	401.485	367.681	106.054	133.748	136.553	159.441	162.512	175.77	204.973	172.323	177.701	327.808	309.546	319.102	0.000429216	0.155845
FBgn0001091	Gapdh1	1364.31	1196.58	1549.5	523.676	523.488	494.793	263.481	293.143	261.666	3111.22	2427.53	1885.26	623.945	703.633	722.704	648.279	647.669	657.357	656.184	606.98	605.676	650.814	776.304	795.831	0.000430168	0.199078
FBgn0032690	CG10333	95.2465	112.664	105.987	51.0683	48.0946	60.4385	46.4671	35.8229	37.843	98.0548	103.493	89.3416	32.9404	40.0546	35.5405	22.4064	24.6531	24.6129	21.2316	20.6506	17.2656	46.8568	45.965	43.1915	0.000431235	0.382714
FBgn0028685	Rpt4	820.499	724.958	905.205	474.701	443.681	427.455	260.882	226.439	201.172	2598.21	2316.48	2040.15	242.255	240.651	244.548	219.688	220.181	222.999	225.106	221.113	211.501	248.691	233.42	249.401	0.000431286	0.280941
FBgn0026873	MED18	159.643	187.303	172.906	61.9852	59.7385	78.3762	68.5464	59.4447	78.8135	96.6843	66.9508	155.395	65.6189	50.4652	61.0429	39.2778	30.2154	29.3219	36.2039	30.2313	35.5734	48.2268	49.853	47.1139	0.000432108	0.397814
FBgn0039341	CG5112	64.021	61.7554	70.082	51.2439	39.9869	40.1463	21.6064	23.4203	30.7554	85.7409	58.8274	68.6248	73.3402	73.9715	71.9137	72.4141	73.262	77.7157	74.8886	63.5409	68.6559	85.1938	82.2057	89.1946	0.00043268	0.386923
FBgn0029094	asf1	763.162	701.97	751.004	530.849	329.982	463.21	421.441	481.564	417.589	2385.84	2496.19	2430.38	222.79	219.492	229.538	220.828	230.264	236.822	237.411	231.183	215.966	229.024	230.545	241.267	0.000432797	0.595899
FBgn0015221	Fer2LCH	2617.05	2282.46	2854.88	1011.2	851.089	1017.86	777.155	728.735	835.707	6107.78	5078.57	5333.31	274.303	309.611	300.732	335.215	334.339	335.081	302.481	277.182	280.465	338.319	341.164	358.333	0.000434865	0.30197
FBgn0000447	Dhod	163.554	143.792	183.689	78.7479	59.3262	70.7749	40.5936	36.0692	41.6075	210.698	215.639	190.35	100.205	102.128	99.4416	105.761	100.983	98.4971	94.2529	93.1074	94.5404	102.021	102.765	101.523	0.000436608	0.24086
FBgn0001149	GstD1	4777.31	3769.41	4692.49	1400.36	1164.58	1358.69	919.766	983.362	989.019	5747.99	4746.57	3513.58	838.334	989.782	1023.02	852.105	882.308	887.532	931.352	872.701	883.483	1074.87	1315.82	1293.58	0.00043845	0.218453
FBgn0036318	Wbp2	132.782	147.716	117.51	79.3881	69.592	81.6296	19.9581	22.1962	35.8148	64.8382	81.5317	88.9357	30.9198	35.0264	31.3853	28.6248	28.7531	30.2133	35.588	26.3846	29.6995	49.0724	50.1386	49.3027	0.000442337	0.195898
FBgn0014427	CG11899	169.808	151.011	166.273	93.6856	74.9302	64.8073	49.7219	51.3925	20.9171	167.455	157.233	101.296	97.0878	107.58	110.893	88.9243	100.504	95.2862	92.4023	86.6238	89.06	107.662	111.804	110.694	0.00044385	0.250531
FBgn0027537	Nup93-1	174.98	169.1	182.358	110.232	109.144	126.745	123.026	109.219	111.703	422.457	428.609	431.168	126.148	142.773	146.855	130.033	136.57	133.423	151.353	142.012	135.085	171.996	160.049	160.224	0.000443924	0.65335
FBgn0039943	CG17168	106.436	109.908	131.603	40.7525	30.8355	40.2405	25.5199	31.2456	20.0402	168.572	192.52	223.354	47.4742	54.5719	62.5693	55.2035	68.5564	63.4089	63.7241	50.4225	58.9688	102.719	123.101	120.62	0.000445577	0.220739
FBgn0004856	Bx42	145.629	138.949	166.624	62.1029	80.4161	81.6138	57.6439	54.4716	62.9083	894.227	719.626	727.061	80.3751	86.3202	91.8171	86.1535	97.47	91.9739	97.6086	81.7252	84.8579	121.921	112.172	124.61	0.000449941	0.387905
FBgn0015282	Rpt2	1238.89	1014.98	1180.13	591.974	606.44	578.578	435.553	419.592	440.322	1908.16	1668.57	1314.92	353.801	346.675	338.349	297.772	292.424	305.899	284.896	278.224	267.14	336.942	308.773	319.866	0.000450122	0.377248
FBgn0035978	UGP	254.377	206.36	231.923	111.166	119.179	103.242	81.219	80.9422	86.3788	458.293	429.631	342.595	82.7376	90.5535	91.5964	86.0845	96.0527	86.2146	90.7323	81.1275	83.3593	203.294	200.726	195.679	0.000450471	0.35882
FBgn0032799	CG10166	145.034	150.831	172.033	76.9305	55.5815	48.8874	34.6642	34.4325	55.6429	122.844	141.052	94.4498	63.1243	66.3814	74.0152	73.0678	65.4918	68.0383	61.8984	50.7038	65.3444	77.1393	78.1856	71.7124	0.000450844	0.266595
FBgn0038870	Oga	91.098	89.6316	112.342	44.436	61.8137	47.4223	19.4621	13.7744	9.32299	41.7228	41.1685	37.8393	52.848	57.7485	58.0779	25.2746	30.972	27.8502	18.5574	17.3229	14.9368	61.5904	62.7582	57.8493	0.000453895	0.145219
FBgn0036566	ClC-c	20.3707	21.6086	23.9697	27.4675	18.7058	19.9453	10.324	10.274	8.91016	102.338	103.917	114.469	31.3864	34.1466	35.9782	42.4056	45.9623	45.6897	48.1078	43.5394	46.636	94.9829	91.9782	82.755	0.000458879	0.44744
FBgn0286809	xmas	32.6473	33.4531	36.3619	36.5789	32.5773	33.3796	19.9853	16.4378	17.8826	229.447	219.52	195.361	29.941	35.5705	39.3757	37.8602	42.7796	40.3728	44.7137	37.322	35.9245	115.593	89.9935	86.8589	0.000463721	0.530006
FBgn0039638	dgt6	165.022	186.389	177.02	133.392	134.184	116.326	91.2595	85.2405	102.243	148.775	141.349	152.091	88.0795	93.3603	91.2849	92.7046	86.2292	81.3608	77.9828	73.7304	76.5152	96.2081	89.4371	90.2078	0.000467774	0.527491
FBgn0028398	Taf10	218.848	241.883	196.631	81.6925	69.9498	82.6851	57.7347	32.6776	17.9355	511.446	446.187	532.571	20.0446	33.3568	32.7958	22.225	32.1185	29.5873	19.8541	23.4145	25.7967	52.9751	52.4138	59.7518	0.000470633	0.164822
FBgn0020270	mre11	53.1031	62.693	70.2967	14.5447	23.908	30.4317	8.52319	8.8275	10.879	50.7903	45.6596	34.1134	62.6936	63.3058	58.6029	57.8326	59.278	57.571	48.0517	49.3105	52.3554	85.8172	81.149	75.7617	0.000471501	0.151697
FBgn0016041	Tom40	211.674	206.157	203.608	128.733	107.089	115.014	65.4589	70.4752	24.6921	1409.92	1347.34	1454.38	144.552	201.77	207.244	252.049	276.544	276.892	308.667	299.929	289.445	321.962	341.955	358.602	0.000472907	0.258475
FBgn0038110	CG8031	71.1945	73.4855	63.2674	45.1508	43.153	52.05	28.4615	26.327	18.6624	355.621	438.402	341.622	47.8807	59.5926	60.0939	63.0144	63.3232	61.5699	76.3815	60.798	61.464	72.5502	81.3341	78.4686	0.000475287	0.353219
FBgn0032374	CG14931	365.288	392.463	390.487	273.065	262.071	299.88	162.708	187.842	219.015	34.3769	48.3965	29.675	132.188	124.481	119.938	133.723	137.264	133.178	132.251	129.943	123.007	201.913	166.512	167.909	0.000476591	0.496034
FBgn0037781	Fancl	148.073	128.034	127.582	70.9258	51.9964	71.2484	55.5332	38.4247	41.1078	33.1093	41.0029	31.7429	40.6104	34.4969	34.4479	23.8241	26.5729	25.4761	22.456	24.5824	21.203	33.6898	34.0057	34.0706	0.000479469	0.334578
FBgn0016698	Ptpa	193.932	171.287	188.018	130.769	80.5992	111.783	74.7207	52.2114	39.237	42.1822	38.7789	45.186	72.1014	61.8807	61.9606	52.9704	50.6977	53.7916	54.2345	41.0658	45.3204	72.6153	70.3586	63.6675	0.000479853	0.300358
FBgn0030054	Caf1-180	57.1933	72.438	62.8043	28.2059	22.5303	21.0402	16.9622	18.6183	16.8342	123.357	117.906	121.413	31.3786	44.0842	47.6889	25.4199	30.6839	31.5622	28.321	22.5073	24.5748	142.11	159.158	137.755	0.000482993	0.272375
FBgn0013981	His4r	8380.25	9362.99	9920.7	6159.6	5400.19	5370.93	4464.91	4608.52	4471.75	11299.3	13068.7	14289.2	922.956	1020.52	1004.75	951.682	823.176	884.928	829.597	833.421	872.678	612.331	595.38	697.855	0.000483541	0.489633
FBgn0264492	CkIIalpha	3016.15	3330.43	2502.58	886.957	694.032	758.612	456.032	468.216	412.341	1540.1	1945.36	1764.48	614.851	721.032	715.187	592.859	599.253	574.65	625.776	532.173	510.059	831.79	789.916	742.702	0.000491223	0.151041
FBgn0030292	CG11752	227.111	246.855	266.131	116.639	142.654	117.483	77.3044	94.3743	110.336	406.944	418.337	359.195	76.5965	76.6594	80.5523	82.041	74.2052	75.8222	63.9947	78.7224	85.6424	65.7724	88.1431	86.0717	0.000492701	0.381051
FBgn0032596	Prosbeta4	1735.31	1577.9	1472.98	861.028	734.856	635.888	692.931	536.054	481.368	3227.39	3449.1	3385.83	514.097	484.637	502.061	608.034	531.35	540.422	604.55	585.359	610.677	477.742	438.758	464.957	0.000493622	0.357352
FBgn0013275	Hsp70Aa	56.3085	69.2706	52.9745	30.3889	37.697	29.0498	8.6451	6.58491	4.29687	77.7397	68.9669	164.563	20.8212	28.0884	30.5482	26.1055	27.111	28.6423	25.7949	22.7965	19.3994	55.3165	57.9401	50.7019	0.00049372	0.109361
FBgn0037468	CG1943	2510.09	2705.33	2245.65	1413.49	1192.78	1698.76	1107	1124.81	1081.21	10201.9	9972.21	10899.2	587.062	718.099	730.696	770.066	787.829	795.459	730.083	736.87	777.325	704.335	847.105	905.271	0.000494833	0.444041
FBgn0015527	peng	123.974	109.352	121.033	77.3195	97.0503	76.2755	53.0841	64.8331	53.3139	352.78	318.26	295.226	112.203	114.067	110.598	104.163	109.639	108.02	98.6714	90.0056	86.9608	123.267	114.248	120.712	0.000497332	0.483214
FBgn0028962	AlaRS-m	21.9448	21.3812	17.4354	17.6718	8.84539	11.7227	4.82474	3.43012	2.04469	13.1086	12.8231	11.7119	34.6057	36.1413	36.2346	30.7425	34.2725	32.9953	33.3038	29.3742	29.7902	40.7456	35.8657	34.2399	0.000497336	0.169508
FBgn0032833	COX4	1904.29	1786.52	2201.89	799.976	863.152	794.658	570.199	631.724	698.325	4255.13	3808.41	3891.61	496.518	474.332	451.337	415.104	413.801	428.944	430.011	436.934	432.898	387.268	397.689	439.33	0.000498301	0.322475
FBgn0033901	O-fut1	192.466	211.491	197.6	151.95	130.035	118.354	68.4424	96.1681	97.0881	1155.56	1007.07	1072.59	106.074	114.78	113.135	110.172	111.587	106.55	102.108	93.5227	96.3267	110.493	90.4747	97.3665	0.000498487	0.435036
FBgn0086346	ALiX	185.062	188.728	212.79	107.174	120.194	108.113	85.0814	97.9164	77.4817	516.763	443.113	397.845	86.0925	89.8571	91.3298	78.9721	81.301	75.395	76.7166	73.7147	69.4118	75.7443	64.6601	71.6881	0.000499512	0.444064
FBgn0051251	CG31251	36.3724	37.1816	32.3646	27.9496	25.7933	23.28	13.0613	12.9016	7.54674	31.2169	31.5604	39.4973	18.7518	23.5437	23.0511	25.1618	28.2002	25.8433	29.4214	23.3007	26.1929	38.0719	34.9736	30.9618	0.000503051	0.316372
FBgn0033160	Dhx15	171.932	168.007	172.223	102.893	93.1322	94.9178	81.1717	70.0856	98.8749	385.012	376.577	365.522	81.2931	90.6505	86.5976	73.565	74.7952	71.9682	77.856	70.1691	68.0212	84.6094	76.5412	79.0427	0.000504211	0.488384
FBgn0014010	Rab5	156.011	177.795	179.701	83.2293	83.0277	116.322	57.9641	22.6815	41.4481	253.752	295.696	269.876	115.893	148.38	162.55	182.166	205.622	196.965	219.99	216.726	213.037	262.773	283.662	283.714	0.00050829	0.237765
FBgn0266570	NO66	198.285	167.24	159.256	66.2336	58.4781	62.7106	51.205	41.9556	52.1013	188.481	203.501	175.966	126.252	143.755	158.609	163.353	182.669	179.739	181.473	162.728	169.592	343.444	325.292	299.638	0.000510062	0.276805
FBgn0030096	Zpr1	80.3581	69.5078	89.1248	75.0403	30.9802	32.242	22.4051	20.8384	20.1626	192.384	180.052	141.952	57.7798	63.9633	64.283	67.9296	69.206	73.7988	79.4451	69.0186	68.2868	82.7799	79.5827	81.7381	0.000511508	0.265308
FBgn0015754	Lis-1	441.997	368.184	402.624	260.735	219.097	269.894	168.274	164.088	130.343	468.923	407.745	502.603	180.563	194.126	198.265	190.53	208.69	198.804	221.742	192.575	194.102	306.897	318.179	309.025	0.000517104	0.381516
FBgn0033692	wash	160.219	153.613	130.978	104.017	82.207	102.441	50.5552	44.8113	57.2067	12.9032	10.5613	19.4338	59.4646	60.3011	60.5686	56.8999	59.5021	57.8503	58.4998	53.2512	54.2515	62.7981	71.0324	69.2492	0.000520599	0.343007
FBgn0284257	Ttd14	275.663	280.571	268.658	220.418	212.093	269.056	133.652	150.299	102.845	718.474	657.781	579.737	129.474	122.559	130.334	131.144	124.209	123.841	107.448	107.239	113.297	130.852	137.609	140.733	0.000521496	0.468905
FBgn0038950	CG5382	40.5827	32.9228	40.9537	24.5531	6.2042	17.7161	0	7.04019	0	14.9624	5.74939	13.6929	58.153	54.8799	53.0191	49.2723	56.7525	55.8211	56.933	57.4862	59.7262	58.0746	58.9496	55.4803	0.000523321	0.0615083
FBgn0004913	Gnf1	189.222	207.47	221	92.6883	90.3198	87.4248	93.0662	71.5175	63.3767	187.176	171.262	142.48	114.432	129.926	138.009	112.373	126.199	119.511	108.894	103.266	100.425	187.88	177.589	166.026	0.000526782	0.369052
FBgn0039049	CG6726	128.679	105.597	125.066	51.3219	56.844	72.0299	45.5002	45.315	38.2308	278.054	250.52	250.544	34.6519	33.4053	35.2264	30.1973	26.6698	26.5359	22.0667	29.7821	23.5379	26.329	21.6994	22.9208	0.000528864	0.359117
FBgn0263855	BubR1	114.913	111.03	118.872	70.5974	54.2996	58.8017	57.1068	62.0037	43.4814	332.836	370.692	348.382	56.6827	68.8952	71.3245	61.4181	65.4054	63.6413	66.4784	58.2619	54.9933	104.244	88.7482	81.9381	0.000531036	0.471533
FBgn0029833	MCTS1	208.946	196.554	226.062	223.935	137.504	149.202	69.2767	76.1176	100.188	660.339	715.802	691.455	127.554	147.722	157.538	152.49	152.529	162.792	152.717	168.018	152.26	137.299	175.288	188.582	0.00053293	0.38885
FBgn0033526	Caf1-105	109.882	101.567	94.0326	77.1355	83.1275	73.795	41.8243	41.359	51.3759	17.1241	30.6297	31.6559	74.5419	89.7229	95.4001	102.004	104.597	102.288	106.952	95.7248	94.5075	162.502	171.005	161.323	0.000533704	0.440482
FBgn0020279	lig	425.2	426.855	507.883	285.484	315.127	273.018	176.241	151.967	172.03	1203.26	1101.45	1144.62	273.327	267.984	257.371	230.682	242.217	247.569	233.2	218.71	215.425	331.143	302.842	294.995	0.000535269	0.367839
FBgn0019957	ND-42	335.634	362.531	404.627	236.178	221.81	194.232	115.386	136.249	83.452	1103.47	1038.1	1022.05	188.034	180.414	170.367	181.468	173.822	174.8	151.799	155.091	155.711	138.823	124.279	137.881	0.000535588	0.303853
FBgn0004087	Dhfr	52.7342	61.0199	54.1882	13.9821	15.3851	21.3074	0	9.25282	13.6935	83.9707	53.3095	50.5483	59.465	75.7274	73.2238	68.8719	67.6872	73.4075	86.3661	69.547	68.1479	71.8237	79.2759	77.027	0.000535918	0.136632
FBgn0039417	CG6073	46.4922	58.3467	58.6426	28.6799	29.7604	21.1825	11.6967	14.1217	9.41837	32.3435	29.2935	30.6801	37.5588	39.3442	40.3271	48.8836	52.5836	42.3419	44.7888	46.8094	49.0723	86.1686	77.7702	76.4381	0.000537474	0.21554
FBgn0003360	sesB	1663.51	1599.24	1899.08	1206.58	1161.27	1088.31	727.642	803.125	691.092	14099.9	12712.4	12187.9	3000.17	2759.39	2669.34	3379.37	3052.31	3124.41	3012.82	3133.94	3059.38	1947.42	1809.67	1947.52	0.000538596	0.430441
FBgn0261383	IntS6	20.5053	20.3987	18.1188	13.4328	12.9414	14.2198	8.69643	10.7088	8.80563	154.931	163.751	139.449	9.39738	11.466	13.4651	13.6924	17.8817	17.2117	19.1809	16.2225	17.6526	86.7247	78.5345	77.8352	0.000539403	0.477966
FBgn0027090	GlnRS	121.46	104.241	102.137	50.0366	54.6611	64.2397	34.7293	27.9553	42.1139	211.489	181.53	139.191	84.5417	90.7187	90.5178	95.3515	99.1276	99.3226	101.639	85.6984	90.7316	129.469	129.887	127.434	0.000540589	0.319665
FBgn0003575	su(sable)	74.6463	82.1305	94.4436	43.1135	40.5352	43.8212	17.6554	20.6978	25.5131	239.683	247.581	242.222	29.5079	34.4984	34.5579	23.8224	26.442	25.5507	27.4948	22.0305	21.1333	54.9054	45.66	46.8633	0.000549229	0.254225
FBgn0031886	Nuf2	94.0364	100.379	116.568	37.1204	45.7383	62.975	28.9209	26.5453	14.9342	127.653	154.617	170.105	87.6114	83.4837	89.0288	81.5161	83.7982	72.975	67.2549	68.7057	64.9933	91.6232	91.0262	92.2228	0.000551218	0.22638
FBgn0040793	CG7630	522.388	469.894	537.955	111.154	150.544	159.467	111.346	116.372	0	2359.02	2744.05	2953.32	444.097	493.135	497.719	494.047	518.047	570.724	561.688	532.411	569.41	528.602	518.914	536.795	0.000551306	0.148812
FBgn0037215	beta-Man	156.27	137.503	131.84	81.0524	69.8713	71.7139	60.7393	50.9414	63.6394	164.053	190.531	180.624	96.4652	93.2511	93.515	72.2694	70.6977	65.2456	56.6938	54.6607	54.1696	70.0221	61.9966	65.6743	0.000556635	0.411923
FBgn0024945	NitFhit	83.1651	68.5558	80.0994	37.5169	32.7755	47.4742	20.4451	22.4317	9.51851	79.7481	80.568	72.8975	51.2414	49.8986	50.0022	56.9054	54.5283	56.7149	49.1858	50.4444	54.1196	54.8591	56.1779	54.9565	0.000565908	0.226017
FBgn0022959	yps	685.302	566.659	653.057	283.897	368.28	303.796	244.531	201.061	263.719	1686.51	1261.6	1178.18	358.861	361.885	352.586	413.591	440.099	449.587	421.276	430.491	445.436	274.189	321.611	346.352	0.000568495	0.372338
FBgn0027599	CG2790	24.4072	23.5022	18.7991	5.77184	2.49545	12.3269	5.11232	4.82492	4.59405	180.281	197.075	153.885	22.3672	33.1809	31.2538	35.8568	43.2008	36.7783	39.5249	34.4455	33.3804	55.5944	60.713	58.3502	0.000568917	0.217833
FBgn0038389	CG5516	63.0288	60.34	58.7747	25.4176	14.8158	32.26	24.4062	22.7472	32.9974	405.503	429.603	449.551	50.4475	65.4734	65.2204	76.1138	65.5988	76.4514	94.7615	87.4136	90.2884	116.968	100.285	104.937	0.000569106	0.440042
FBgn0039110	RanBP3	287.643	245.192	252.996	146.772	126.401	133.365	86.0112	73.733	111.836	215.051	217.299	206.384	157.033	165.498	159.063	165.896	171.051	177.96	182.084	172.077	167.941	245.275	258.761	244.038	0.000571037	0.345596
FBgn0029512	Aos1	740.532	692.963	802.241	533.226	392.386	430.011	337.058	377.939	285.901	1947.2	1770.02	1608.48	255.762	240.734	240.102	231.385	218.999	233.955	237.26	223.336	233.514	238.195	215.857	215.185	0.000571876	0.447682
FBgn0266711	EloC	80.5267	111.701	88.0601	41.4284	35.0011	39.9597	0	0	0	989.79	1263.69	1098.47	35.1765	63.1919	81.7583	87.793	82.0637	86.5916	91.2668	88.7514	102.356	143.381	143.245	144.853	0.000573309	0
FBgn0261396	Rpn3	1307.55	1113.81	1311.58	664.804	661.584	703.607	549.266	424.686	518.127	1172.59	1022.33	913.664	291.436	296.928	290.546	277.545	274.676	274.094	285.145	278.259	275.378	289.481	281.898	278.207	0.000577903	0.399707
FBgn0022942	Cbp80	138.788	142.03	126.119	82.1866	91.1997	93.8077	50.4746	69.4259	50.7067	588.071	641.62	630.051	92.7134	95.9706	96.519	94.7983	109.522	103.422	108.736	101.739	104.362	131.205	112.998	115.421	0.000578419	0.419248
FBgn0023545	PIG-K	130.998	136.879	169.906	45.1716	68.7204	64.0115	14.5799	26.0009	10.0474	128.489	128.42	91.1446	75.9245	87.3251	84.9176	89.2368	87.5659	87.1418	82.9061	86.9044	90.1339	81.9659	78.5668	80.5773	0.000579176	0.115647
FBgn0050000	GstT1	442.7	535.117	450.821	324.441	228.261	298.165	121.379	147.171	73.8077	1479.65	1552.22	1278.87	177.473	194.585	195.352	174.442	171.949	175.687	170.513	167.01	160.336	223.317	214.638	235.265	0.000581669	0.239639
FBgn0034258	eIF3c	133.197	122.496	133.451	74.3493	101.411	80.0212	62.2472	49.5699	70.088	469.145	432.369	383.806	383.099	412.136	398.369	410.266	434.379	421.333	395.413	382.238	360.871	402.184	391.722	382.121	0.000586049	0.46745
FBgn0004556	Dbp73D	76.5883	74.8371	89.261	40.9219	28.2563	43.9744	20.6919	22.6048	8.3037	106.975	120.694	140.6	45.3294	48.7248	48.0011	44.7864	46.3972	46.5332	41.7007	42.4786	38.6562	60.6959	51.9415	53.1569	0.000590148	0.214388
FBgn0019890	Smg5	13.2739	13.4998	11.7495	5.44805	11.1739	10.7534	6.28385	4.55552	4.75936	72.0623	88.6093	77.2681	9.83717	15.4634	16.1979	15.0066	19.7281	18.6341	19.5515	16.8422	17.4746	38.0421	35.0143	33.0891	0.000591351	0.404917
FBgn0050122	CG30122	160.218	191.304	169.588	120.464	131.288	140.24	84.3755	78.8852	76.1246	703.035	597.332	563.875	70.3003	63.4877	68.1726	60.2263	61.2161	60.7933	61.8475	52.1397	50.6458	114.281	100.254	96.3878	0.000592676	0.459376
FBgn0086355	Tpi	1226.05	1022.3	1199.32	763.828	770.526	829.31	454.984	526.188	468.292	1508.68	1198.73	964.348	453.027	458.705	482.344	460.161	479.897	500.349	519.584	507.851	512.532	623.14	745.288	709.359	0.000593906	0.420419
FBgn0020503	CLIP-190	11.7135	14.0902	11.4757	3.32225	2.84771	2.01824	2.49296	1.84721	3.6664	4.70573	14.7725	8.21893	9.0147	11.9295	15.7889	21.1728	17.2198	12.5732	17.3166	12.7524	13.1196	85.6349	77.0859	66.7562	0.000594609	0.214772
FBgn0263987	spoon	155.813	195.715	162.982	58.7758	48.7583	43.1686	35.2133	40.9606	16.894	1272.09	1270.7	1608.2	80.1043	111.253	114.549	177.43	192.933	188.818	223.096	196.251	204.595	381.39	343.949	361.776	0.000596345	0.180886
FBgn0051617	His1:CG31617	23.2548	17.3947	22.1139	7.25806	4.20423	4.49886	0.997915	2.94468	0	9.54051	21.6568	50.5265	154.017	204.633	224.427	262.15	253.747	254.904	306.212	284.068	288.452	371.722	370.747	398.158	0.000596634	0.0628167
FBgn0000559	eEF2	907.725	810.356	890.779	513.691	655.493	582.352	427.729	443.78	519.392	3760.31	3588.56	3009.28	4500.87	4384.5	4216.92	4565.16	4437.64	4335.02	4011.32	4157.36	4034.78	2997.22	3068.25	3092.49	0.000597116	0.533145
FBgn0034172	CG6665	65.5555	63.5572	64.0949	26.4462	29.3849	24.7848	16.0565	18.3906	30.0335	199.191	216.582	213.154	21.3929	24.3531	24.7135	21.4137	23.6914	24.5661	24.6708	20.4459	22.723	35.0939	36.0255	35.6828	0.000599887	0.333738
FBgn0036671	CG9951	60.7215	54.8273	54.1285	30.6767	19.6763	24.7131	16.9641	10.0903	2.14223	42.7096	40.8088	32.3079	42.0815	44.5372	44.4016	47.3035	48.809	45.9745	54.8581	46.2442	49.4619	60.5445	58.9135	60.764	0.000601523	0.172072
FBgn0039233	CG7006	83.8628	96.1828	84.9791	55.6644	68.8841	53.5999	49.8452	49.8232	49.4124	305.879	371.083	489.034	65.1146	54.8792	58.6498	58.867	63.6795	59.3506	53.3803	58.2192	63.1598	95.6475	89.7273	97.9832	0.000603339	0.562516
FBgn0025373	Fpps	148.16	176.221	163.479	175.935	127.425	171.603	80.1458	84.6987	80.2006	850.931	928.184	865.772	58.8309	65.0881	66.9165	64.0572	61.8834	63.9439	60.3419	57.2937	59.346	92.9951	79.0022	79.9596	0.000605399	0.502285
FBgn0052230	ND-MLRQ	4146.11	4195.11	3671.71	2241.8	1806.77	1859.82	746.855	1023.18	0	5118.01	6805.92	7851.59	533.174	621.048	637.184	592.677	597.58	627.171	607.387	571.079	548.496	729.434	575.523	621.142	0.000606396	0.147344
FBgn0086908	egg	86.1665	98.5271	96.9317	54.9079	46.7694	52.7779	36.7176	48.6994	38.9799	254.689	260.993	239.01	50.7061	51.2035	53.6896	47.75	48.1863	46.1071	48.5858	45.2863	40.2511	67.7241	55.6943	58.3756	0.000606701	0.441711
FBgn0041171	ago	133.423	132.483	138.832	96.5268	106.712	107.467	70.4131	63.9252	84.3618	402.225	379.931	389.716	137.883	154.705	156.176	152.297	163.794	160.989	174.825	155.982	149.666	357.997	317.394	299.404	0.000614247	0.540349
FBgn0039359	RpL27	906.654	984.768	896.745	632.819	705.207	587.457	547.324	543.745	617.76	894.551	1151.66	1040.81	5572.24	4730.61	4929.28	4675.32	4415.1	4532.33	4157.32	5042.2	4781.75	1849.25	2171.09	2356.99	0.000614503	0.612886
FBgn0284220	Top2	70.1966	87.525	76.2858	33.756	37.9037	29.2796	23.6915	22.9137	14.2527	256.649	268.081	257.789	63.4844	93.0415	98.5138	91.5958	114.415	108.517	126.768	99.674	106.764	423.051	402.728	365.619	0.000615325	0.260068
FBgn0052039	CG32039	272.69	307.648	214.506	120.07	84.5148	113.792	0	0	0	296.038	207.765	332.158	65.1174	51.8245	47.6803	46.594	65.3226	68.5973	70.0701	60.8297	68.3775	59.6031	58.9551	59.4201	0.000619021	0
FBgn0265047	FDY	335.404	313.012	400.593	198.52	222.116	240.498	76.1208	90.2915	95.5683	298.347	282.766	476.786	142.334	174.553	179.862	177.926	186.734	191.022	187.817	175.409	162.278	197.143	244.264	200.224	0.000619525	0.249741
FBgn0032919	CG9253	109.64	95.1468	120.761	82.4575	61.8559	51.8579	31.1467	28.7263	17.6781	175.395	192.96	236.349	35.5813	43.4806	47.5333	39.1431	44.9567	41.2499	38.3402	32.6939	38.0114	66.9841	78.4658	70.0651	0.000624662	0.238217
FBgn0003714	tko	177.958	209.931	172.713	25.2454	38.0125	26.3582	10.5685	27.0484	49.5863	407.386	383.318	373.045	103.314	95.9441	113.236	119.232	96.194	110.16	138.09	107.143	126.937	144.682	160.633	157.005	0.000625424	0.155553
FBgn0026207	mbo	103.284	111.509	97.7137	75.2473	85.7577	81.1814	58.7095	63.3101	64.0006	415.464	428.143	403.209	53.5301	55.3352	57.0173	60.844	59.0168	55.7909	55.9202	54.6067	51.7415	70.9451	60.4452	60.9593	0.000627058	0.595253
FBgn0035965	Use1	19.8372	28.4995	25.0138	0	3.32511	10.0996	0	0	0	10.9235	21.254	17.9357	31.5488	39.7758	46.227	46.2945	52.0819	53.1957	57.6312	57.5715	52.8427	87.7401	79.5511	84.475	0.000628194	0
FBgn0002542	lds	229.8	210.169	255.636	144.216	146.205	133.579	106.333	94.644	94.9053	126.895	120.684	108.927	122.667	137.2	141.031	127.039	132.878	128.798	125.637	115.779	110.614	237.459	213.256	204.414	0.000629078	0.42536
FBgn0264848	vih	589.855	551.703	715.157	131.573	188.874	211.528	135.996	143.964	136.672	734.845	767.868	528.08	170.635	190.233	183.747	185.004	183.07	178.775	217.229	192.147	195.95	245.024	270.45	266.903	0.000629743	0.224392
FBgn0286778	CG46385	653.329	593.773	669.486	510.426	551.765	482.522	404.649	360.951	363.086	975.042	952.163	943.157	232.587	266.643	270.443	251.586	259.752	256.645	242.55	226.717	218.744	434.827	474.506	463.513	0.000631011	0.588904
FBgn0001330	kz	28.8888	23.6033	24.3358	12.0975	13.3823	12.0133	9.16888	8.97639	9.89766	71.6539	79.5712	77.2686	16.9129	21.6354	21.781	19.3701	23.7958	19.8862	19.2565	19.7372	17.4214	39.8794	42.3597	39.1934	0.000633032	0.36501
FBgn0036663	CG9674	69.0572	67.2486	71.6991	57.7221	68.8362	66.5931	52.3035	49.0039	53.3212	37.2008	30.9914	23.7975	43.9246	36.217	34.611	33.4938	32.4647	32.7505	28.1807	25.8481	24.7468	37.7642	27.9905	25.8273	0.00063347	0.743389
FBgn0030655	CG9213	150.976	130.875	117.772	73.2596	63.5955	57.7841	38.5626	33.832	41.036	36.3602	44.8221	48.9934	42.7042	43.6019	43.1332	30.1753	31.2238	32.9451	34.3757	26.9004	28.5884	45.0975	49.3104	46.088	0.000644743	0.283844
FBgn0016031	lama	10.1331	9.92573	12.225	0.997539	2.57988	7.01962	2.41085	3.53715	3.07523	11.5392	13.491	10.8803	9.31865	12.2086	11.4241	14.0247	15.459	14.7217	17.8491	17.1823	15.0994	43.5838	44.0629	40.888	0.000645957	0.279496
FBgn0039450	Yif1	232.374	180.452	207.282	67.7231	42.01	73.4624	28.589	56.485	30.4005	66.5707	54.1477	57.8857	55.3493	67.6302	66.3937	60.458	56.1464	59.7822	59.7622	58.8963	59.531	82.0087	83.126	83.5776	0.00065371	0.186217
FBgn0020255	Ran	1143.53	930.435	1119.72	452.642	449.788	419.343	411.18	356.61	411.611	6848.9	6737.58	6063.55	680.191	786.765	814.376	963.916	977.98	973.323	1087.13	993.966	980.328	1344.88	1292.08	1308.99	0.000654589	0.369292
FBgn0044871	Gos28	49.2234	51.3298	57.9462	18.9776	24.4781	21.2456	13.7198	7.56685	0	394.527	469.286	473.456	50.4094	52.4554	49.8212	68.399	66.8099	67.6389	76.2787	67.3242	73.6315	112.995	110.416	105.183	0.000655201	0.134301
FBgn0015359	CG2034	138.783	126.365	114.136	52.6493	70.1399	74.2418	29.8806	36.7461	49.4812	202.817	218.385	183.849	58.2837	83.0151	81.821	77.4605	88.2664	87.6255	93.5269	85.0289	87.7	95.0707	121.017	118.471	0.000659529	0.306124
FBgn0261609	eIF2alpha	255.86	273.819	300.849	159.913	187.374	158.35	130.68	107.155	90.8925	718.332	641.293	556.779	372.743	352.045	361.65	372.548	360.205	363.909	356.253	349.436	342.081	232.685	268.127	265.147	0.000661249	0.395806
FBgn0035249	CG17249	76.7953	75.3181	84.4831	32.8619	30.9782	35.56	30.6409	30.4612	16.3005	119.431	119.355	139.048	19.0635	19.1363	20.203	14.2897	16.096	16.9302	14.1129	17.5723	14.9921	33.1406	31.519	29.9426	0.000661598	0.32715
FBgn0035811	Mcad	1947.95	1657.08	1986.46	1003.99	1119.53	1039.84	642.961	532.288	781.135	3069.12	2652.98	2614.18	407.609	411.747	409.328	326.802	314.081	303.233	245.864	246.378	240.83	334.502	329.957	358.504	0.000662891	0.349886
FBgn0039149	CG18428	61.5534	77.1704	83.5436	21.3027	18.9997	24.1429	0	10.2765	0	55.4335	72.2502	52.9757	14.1451	27.798	32.5528	28.818	23.8258	19.8035	17.3149	27.5983	16.9615	31.6208	32.6369	35.5755	0.000663341	0.0462349
FBgn0034646	Rae1	181.065	187.767	149.007	76.3383	104.017	74.2541	50.0162	54.9844	37.2702	301.567	295.294	262.021	91.5697	103.812	104.448	102.587	98.9192	102.165	99.3699	100.394	98.2224	116.732	110.741	117.205	0.000664272	0.274739
FBgn0052095	CG32095	83.9618	75.8216	96.9003	43.4998	41.4261	48.9429	24.0356	27.5707	21.2388	122.533	116.606	115.829	49.6566	42.4776	42.1065	50.8412	42.553	41.8433	46.0093	49.6207	42.9229	52.169	51.5259	52.133	0.000666702	0.283793
FBgn0033380	Phax	52.6962	67.9423	60.4783	29.1799	17.4426	51.5998	16.2814	7.31219	9.84227	40.1115	41.6737	37.6093	51.1392	68.9884	66.445	71.8742	68.8213	73.5891	75.6889	62.9101	63.5809	99.2102	104.258	97.9888	0.000668133	0.18461
FBgn0266369	Mtp	72.0417	70.8583	59.4805	41.7946	42.902	52.0971	26.2639	29.389	28.8256	44.7306	38.9449	21.6505	41.6552	48.3085	47.0743	44.4515	42.3771	44.7	39.5506	38.0352	36.8582	64.7505	60.1456	56.224	0.000673409	0.417424
FBgn0031909	CG5181	123.937	144.234	146.478	58.6865	31.4789	63.6218	39.9765	43.9182	60.131	423.865	419.908	439.956	52.1718	59.4737	58.2419	61.6678	62.8073	59.53	74.3506	72.3775	74.7224	47.7456	52.3665	58.2896	0.000674489	0.347343
FBgn0002579	RpL36	1021.12	1020.45	878.788	835.691	1018.23	747.401	519.078	520.608	483.233	955.685	1150.7	997.792	6948.06	6584.69	6589.43	6740.48	6892.77	6748.57	6314.58	7164.02	6956.62	2310.08	2798.43	2669.46	0.000677126	0.521485
FBgn0030501	BthD	223.992	180.936	180.466	97.6957	112.269	87.6312	49.2187	48.9456	60.623	95.4814	81.9398	86.1383	146.201	151.681	154.179	124.191	135.679	128.619	123.102	115.489	119.091	149.512	186.104	162.92	0.000679341	0.271249
FBgn0038551	Odj	122.149	130.502	125.28	76.7086	81.0273	90.5408	50.1153	62.0145	72.0465	346.741	336.646	360.364	54.1004	63.2306	68.7821	69.1565	70.9088	72.3541	65.4445	65.2418	64.706	105.899	103.202	110.343	0.00068222	0.487327
FBgn0033518	Prx2540-2	34.0879	35.7388	43.9101	14.5047	27.6453	20.9218	6.95314	2.05809	0	75.8201	74.3568	137.612	7.86491	3.36677	5.84276	2.31986	3.33784	2.78384	5.75542	3.47501	3.19245	9.45866	9.57413	9.0614	0.00068235	0.0792287
FBgn0010348	Arf79F	632.754	808.607	684.164	352.771	353.617	433.428	167.159	147.615	62.0506	3843.47	4609.09	5337.36	271.237	356.388	372.528	399.025	438.687	438.766	465.862	445.628	433.545	675.174	595.478	624.077	0.000685973	0.177286
FBgn0052473	CG32473	135.693	158.29	143.197	93.3796	103.074	105.172	83.6051	78.2375	76.3892	212.054	204.945	193.424	86.152	101.583	105.501	100.634	111.19	104.514	104.204	97.2487	91.8454	188.673	189.054	185.72	0.000688077	0.544929
FBgn0035630	CG10576	438.34	522.918	547.775	243.751	277.368	273.383	183.569	163.279	133.941	962.943	1016.81	837.499	438.74	465.786	457.23	469.185	483.088	450.302	434.004	396.928	398.662	493.895	517.841	496.892	0.000688202	0.318607
FBgn0284252	Letm1	132.914	128.26	147.375	76.3324	78.2822	92.748	67.3245	50.036	46.5959	66.38	59.5305	49.9559	40.5717	44.4388	48.9136	39.4375	44.1615	43.197	39.1905	34.3041	33.8068	92.1663	88.3802	79.2561	0.000696023	0.401313
FBgn0053813	His1:CG33813	25.6005	24.8006	18.8318	8.52034	4.2384	5.03369	0.973749	2.94468	0	8.82191	22.3984	49.8659	150.026	205.067	225.94	269.677	249.008	257.559	299.579	287.493	287.905	382.948	379.668	398.168	0.000699981	0.0565977
FBgn0035423	eIF1	1789.83	2310.98	1795.64	827.133	721.42	672.573	286.085	277.949	368.22	1073.71	1192.69	1515.61	710.789	647.867	632.778	605.948	578.087	548.034	558.718	589.933	546.638	552.737	552.218	499.327	0.000699985	0.158104
FBgn0001092	Gapdh2	5866.38	4713.07	5700.57	2772.98	2331.58	2556.53	1894.54	1676.69	2054.24	2823.07	2292.92	1939.72	1854.92	1872.5	1919.83	1933.04	1870.74	1982.02	1983.83	1887.41	1901.78	2026.76	2275.43	2146.01	0.000702464	0.345545
FBgn0260755	CG42553	23.4976	31.0982	30.9268	6.12422	2.02837	10.0837	4.33141	1.927	0	10.9591	11.5684	9.87202	16.2648	23.7854	22.6609	23.4645	27.6924	24.8097	28.371	21.8595	26.2052	34.579	35.5217	32.1444	0.000704506	0.0731784
FBgn0261119	Prp19	238.99	300.57	287.156	185.307	202.872	203.899	93.1165	101.079	82.7191	844.029	770.547	741.689	82.5261	100.877	104.982	108.397	104.33	105.202	109.936	97.4415	99.7275	123.192	118.302	122.607	0.000705466	0.334957
FBgn0033717	CG8839	34.4854	31.2991	39.5148	8.34197	14.1427	17.0686	6.23119	9.05465	2.22591	48.5169	46.3903	31.0552	44.6376	48.2183	47.8535	55.9277	54.355	54.1669	53.8903	54.1514	57.3885	78.6971	77.0627	75.4568	0.000707117	0.166305
FBgn0035906	GstO2	368.673	383.112	410.522	208.194	198.573	204.406	156.255	167.353	92.3056	2135.58	2240.72	1971.85	103.441	122.839	127.925	122.615	124.607	113.099	128.657	117.708	115.524	157.105	150.421	153.484	0.000707886	0.357834
FBgn0031495	GABPI	66.5578	58.6909	53.4087	26.2906	11.1045	21.0557	18.787	11.3289	8.00251	129.832	158.568	156.61	41.8899	49.7577	47.7531	49.7897	53.3702	55.7918	61.4906	46.8548	53.9628	74.1069	63.9638	70.5918	0.000709529	0.21336
FBgn0035766	eco	70.1219	70.4078	66.9458	29.5458	27.1907	40.0972	35.6357	28.0513	40.0561	124.712	130.058	108.206	87.5493	98.7853	104.168	98.8855	110.363	100.537	107.123	100.995	92.4029	180.477	160.143	155.076	0.000712489	0.500026
FBgn0033401	CG1968	27.8557	26.6776	24.05	15.6442	25.4933	21.0605	11.1348	13.2013	9.29089	72.4231	79.0515	53.7578	26.8226	31.0286	33.1017	32.1233	36.8084	36.3325	29.6962	32.2475	29.6767	42.7293	45.0484	45.6886	0.000713477	0.427916
FBgn0051648	CG31648	14.2199	12.0663	14.1742	12.9475	6.39024	10.5102	0	3.32901	0	6.11614	6.82085	3.88951	16.9835	29.2778	27.6481	26.0512	33.4096	38.8193	38.4276	35.6664	34.9239	39.9298	43.2001	38.6739	0.000715576	0.0822785
FBgn0026380	Prosbeta3	1150.39	991.814	1139.49	581.064	667.752	688.49	496.255	509.002	594.361	3173.67	3151.43	2775.85	357.229	387.476	396.324	393.025	397.375	397.071	407.846	391.415	374.475	427.127	437.64	443.825	0.000716032	0.487436
FBgn0036118	Blos2	253.301	229.357	196.303	135.659	96.1979	90.0112	68.4138	68.1939	73.9855	188.282	204.495	255.448	56.2304	46.8832	50.4736	33.3629	30.6612	32.0304	22.3079	24.1255	28.0555	52.8471	40.8551	47.1698	0.000717676	0.31017
FBgn0260744	Tango9	140.749	156.492	178.105	97.1652	79.9927	110.906	58.8737	54.4993	51.9699	221.088	155.861	144.866	61.1414	67.5269	69.2887	71.4229	69.934	69.7928	63.4246	56.224	53.1005	111.175	95.3917	93.0821	0.000719102	0.347837
FBgn0037811	CG12592	187.54	203.915	150.412	97.2212	114.308	97.0732	31.1321	34.679	25.9174	138.738	117.674	203.841	94.7294	110.015	115.788	102.707	112.392	94.9025	95.1548	75.185	76.9403	243.485	217.127	198.583	0.00072566	0.169283
FBgn0013674	mt:CoI	5019.03	5028.08	3695.36	993.271	801.812	830.062	399.604	509.887	364.199	1103.98	2092.2	1653.18	12481.3	15491.6	15411	7893.31	8425.9	7623.48	5426.65	6122.36	5048.83	9643.8	8067.94	8310.4	0.00073106	0.0926828
FBgn0038810	Srp72	98.0072	82.4073	87.4126	53.7534	34.6107	39.1543	41.2196	29.1464	30.8668	51.6029	46.06	32.3955	47.6822	57.7035	59.9036	60.9641	62.4617	62.1156	67.9723	63.5317	62.3889	69.292	71.1689	68.4019	0.000732213	0.377979
FBgn0000046	Act87E	213.714	256.685	223.782	19.3429	178.726	10.0462	104.818	83.7339	100.928	1140.78	933.741	2180.48	1.44901	0.795301	1.34228	1.70819	2.41119	2.82333	1.61901	1.76155	1.50482	3.32985	2.14981	2.19285	0.000743206	0.417009
FBgn0036987	CG5274	103.007	112.656	90.6579	72.5011	74.3421	70.2395	41.5904	33.435	40.3344	36.7478	46.3049	36.7157	33.563	38.9096	37.9547	34.7692	31.8687	29.6408	27.9011	31.9844	27.3555	39.9985	38.6354	39.5087	0.000747118	0.376598
FBgn0250906	Pgk	536.797	540.072	640.711	295.694	286.819	323.097	238.79	206.511	251.783	2078.33	1594.84	1217.8	213.986	236.513	244.279	210.142	254.552	234.473	234.989	235.862	227.15	233.783	266.757	277.182	0.000750714	0.405852
FBgn0032467	CG9934	143.461	156.104	146.784	81.6484	83.8828	81.3339	76.5795	61.571	46.7996	341.591	362.288	302.384	57.72	68.0901	67.3178	50.075	55.2396	53.1402	54.8882	48.013	45.7005	111.356	93.4891	93.6152	0.000751047	0.414362
FBgn0026084	cib	1967.79	2680.29	2575.58	827.738	712.299	778.949	265.523	394.642	274.549	6309.81	5861.44	6121.91	480.085	505.1	520.392	478.427	527.482	540.029	531.718	500.757	505.884	884.94	902.227	864.978	0.000751048	0.129396
FBgn0263251	vnc	176.061	212.084	216.591	109.483	87.7706	109.652	36.9993	64.9662	64.0435	828.785	915.113	932.985	172.621	180.926	184.944	196.564	213.556	207.735	222.731	212.613	203.814	177.994	230.677	243.248	0.000751568	0.274515
FBgn0039163	CG5515	160.054	198.485	194.249	74.4948	69.2132	105.823	68.3493	72.8125	61.0497	513.106	548.519	482.014	121.257	122.503	131.291	145.072	138.351	143.769	146.638	128.512	132.342	172.562	172.342	169.741	0.000760882	0.365804
FBgn0028684	Rpt5	865.77	729.011	920.065	397.039	446.141	461.518	318.246	303.318	271.696	1116.49	966.568	849.802	239.103	259.357	270.535	250.487	258.94	259.07	280.361	243.629	228.174	288.292	298.382	289.458	0.000761265	0.355195
FBgn0001233	Hsp83	6898.84	7412.11	8163.73	5025.22	4772.13	4960.4	3946.41	3193.82	3336.35	9025.54	7515.66	6620.26	2358.72	2744.23	2729.41	2588.52	2620.66	2669.69	2534.37	2302.01	2200.79	3261.91	3137.02	3168.31	0.000769133	0.46615
FBgn0014022	Rlb1	60.8368	54.5301	44.2378	22.3774	16.102	18.1169	8.23187	9.40176	6.3704	105.793	138.09	132.709	27.9146	30.7959	29.7236	33.4	33.3014	35.5812	35.8498	26.6679	24.8673	55.1789	48.9302	47.5147	0.000778076	0.150397
FBgn0039156	CG6178	186.191	142.296	165.593	82.9083	56.2816	62.3585	38.3635	39.2209	50.8353	149.19	125.774	87.8521	62.2305	79.5148	81.3527	86.6128	89.2779	90.4834	93.9364	81.0837	83.2031	164.586	170.319	155.224	0.000787548	0.259917
FBgn0261530	nbs	61.1967	60.0635	69.2241	32.9364	28.2298	28.8631	25.085	20.7715	30.9982	28.8172	32.5387	26.2468	35.8498	43.1047	42.1605	28.5757	42.5545	41.64	36.5326	36.072	34.967	76.3932	72.1742	97.5265	0.000788707	0.40347
FBgn0039835	mRpL32	334.01	302.102	389.029	160.432	112.646	143.586	90.2196	110.109	106.935	88.8947	120.333	126.386	82.8912	83.2094	80.7429	68.4882	59.435	61.3353	62.0526	61.0775	65.4959	87.9772	83.5094	87.6004	0.000788836	0.299728
FBgn0032231	CG5056	57.7916	60.0651	69.2544	24.876	33.2632	42.6969	28.6776	24.2179	21.271	41.266	52.7485	65.0191	62.8352	90.1647	88.7358	100.266	106.89	105.576	106.319	104.328	96.9608	174.605	175.671	170.328	0.000790394	0.396376
FBgn0038989	CG6937	302.251	315.064	395.541	138.396	97.0641	114.474	71.8752	66.1584	46.3709	131.547	119.103	101.699	183.371	186.733	191.958	170.63	181.776	179.939	179.797	156.489	161.923	234.397	261.177	243.016	0.000794023	0.182064
FBgn0025865	Cortactin	30.6652	27.6961	34.8911	21.2803	13.5715	15.6035	10.4668	9.64869	12.2298	184.149	164.941	169.736	27.7843	30.101	31.4897	38.4361	37.9466	41.5492	45.8915	43.0589	38.1693	67.5159	71.1793	68.7457	0.000796407	0.346857
FBgn0013718	nuf	45.6087	47.6612	50.8954	21.3565	32.6876	34.4279	16.19	22.3335	24.6605	400.721	401.459	382.697	34.0991	43.5099	49.6503	50.6303	56.1964	54.907	64.8442	56.2062	58.1009	130.712	138.256	136.186	0.000800343	0.438274
FBgn0037141	DNApol-eta	26.2627	24.6272	21.5716	10.5546	12.5964	10.7249	4.88858	9.22427	5.47712	33.7043	30.3794	28.2846	32.3417	44.1948	45.4452	57.7736	69.4751	68.7393	74.118	64.9496	64.9173	119.651	108.525	100.014	0.000801603	0.27035
FBgn0029823	Shmt	358.845	275.487	320.963	148.77	187.6	136.862	61.5302	97.6519	77.875	752.679	617.289	541.278	202.084	187.268	175.808	177.356	177.937	175.793	177.479	168.682	175.331	141.999	154.416	165.757	0.000803214	0.248151
FBgn0039929	CG11076	290.564	331.13	280.172	182.455	147.908	158.342	124.018	141.541	152.962	449.363	500.074	475.462	283.404	310.171	331.488	346.921	353.556	366.06	434.656	368.059	386.232	403.573	402.028	382.579	0.000804082	0.464061
FBgn0037220	CG14641	265.102	310.896	321.088	194.885	191.334	187.137	110.353	136.122	101.577	637.371	687.782	718.75	111.105	120.329	124.973	105.376	107.341	105.032	102.093	96.6326	94.892	121.789	133.347	139.594	0.000806505	0.38798
FBgn0014092	CG4278	99.8823	126.322	118.637	37.9373	52.9212	32.119	25.5407	23.5312	2.54483	140.97	161.958	157.961	39.2501	43.5983	44.0842	32.0527	39.0198	33.2464	34.4011	30.8557	30.6542	78.979	71.9972	68.6722	0.000813656	0.149683
FBgn0011703	RnrL	1207.61	1356.16	1296.79	1050.16	1074.27	1036.58	839.527	816.309	732.419	1976.16	1941.09	1648.15	381.696	417.921	418.887	377.137	385.134	363.951	339.627	321.529	312.106	396.216	372.745	354.823	0.000815989	0.618629
FBgn0033737	Nup54	105.995	88.2313	107.551	39.6821	53.2348	41.1018	15.8736	27.2161	34.5027	153.82	142.879	165.472	82.8588	91.8274	92.0662	97.749	97.3679	99.5989	95.4155	95.8063	91.5728	135.082	143.354	136.181	0.000816668	0.257118
FBgn0031392	AIF	175.133	198.113	203.542	92.2573	104.956	108.883	74.2533	35.0953	66.0096	63.8384	66.4632	47.2851	58.806	71.8889	75.2942	65.289	71.4484	72.6075	68.1843	67.5606	65.3598	125.634	129.51	119.007	0.000820646	0.304025
FBgn0011661	Moe	318.937	303.468	353.839	269.476	194.973	241.974	177.316	147.483	139.388	1011.99	875.753	819.04	133.912	171.734	189.04	185.439	212.087	214.519	214.689	206.222	193.939	340.969	371.472	358.729	0.000822578	0.475482
FBgn0063494	GstE6	988.66	894.469	832.837	640.052	520.483	579.717	449.808	489.346	415.163	1076.88	1120.91	1007.74	226.866	225.256	249.932	214.564	211.719	210.567	213.397	206.684	202.773	221.822	199.816	185.156	0.000824043	0.49865
FBgn0010235	Klc	332.92	381.168	392.806	232.755	245.974	240.166	178.248	190.402	151.554	676.479	605.786	558.256	119.225	133.86	130.428	117.101	121.02	121.41	127.199	107.972	105.736	165.23	141.122	147.359	0.000828661	0.469968
FBgn0033916	Usp20-33	41.4635	43.2502	49.5868	12.4389	16.98	20.3289	11.0616	9.11666	0	11.8644	12.4459	17.1963	30.7587	37.2887	39.5926	35.7352	38.7152	37.7706	40.156	39.2637	35.7401	90.5163	86.1117	79.6864	0.000828823	0.150247
FBgn0051739	AspRS-m	23.7785	29.1021	25.2186	10.5088	13.1901	11.7533	7.5496	6.4238	10.3967	122.172	123.191	140.478	15.4828	26.1952	28.8348	30.5184	37.0061	35.6864	39.181	34.6619	33.4797	127.615	114.007	106.745	0.000829658	0.312041
FBgn0030851	CG8326	40.7589	47.8186	44.5584	16.5464	13.7052	19.1838	21.3776	14.0446	17.9747	234.567	286.058	254.311	20.6291	26.3696	26.7712	29.6927	30.6728	32.6535	28.8824	32.0434	34.0007	54.2074	45.7848	51.2081	0.000830536	0.40107
FBgn0040075	rept	205.777	239.569	252.258	145.237	124.705	141.864	76.0471	101.515	73.5842	1111.33	1012.07	945.429	94.7767	94.3371	97.2692	100.397	104.474	107.152	91.3009	95.4218	96.2163	98.4774	98.5745	100.913	0.000836107	0.360012
FBgn0005655	PCNA	1497.15	1249.76	1599.07	750.14	718.364	766.39	492.385	512.415	524.561	5548.91	4874.38	4494.48	485.471	480.949	475.955	510.056	528.807	533.257	543.289	563.793	538.022	529.236	536.263	531.616	0.000838085	0.351903
FBgn0032197	ova	34.559	42.0914	37.6743	6.67504	4.28384	11.0748	7.67902	9.295	0	221.262	318.885	315.069	66.2217	82.4842	83.4168	110.769	115.143	114.238	139.685	111.767	104.192	252.377	213.452	205.86	0.000843304	0.148472
FBgn0027093	ArgRS	154.897	154.756	124.029	127.237	122.488	98.8752	52.2792	52.8689	51.1955	83.6267	86.0411	58.9191	72.4132	73.7881	70.3016	66.7702	68.604	67.192	60.0214	55.362	53.4857	110.764	104.962	97.5445	0.000845641	0.360503
FBgn0035402	Usp5	292.062	243.709	281.062	185.186	171.546	183.355	129.914	143.415	135.435	745.935	654.393	510.695	135.721	128.097	129.262	137.357	131.303	134.181	131.596	123.374	118.792	152.832	129.044	135.657	0.000851346	0.500426
FBgn0038349	AOX3	111.487	118.299	105.294	65.7348	72.1235	70.478	63.5225	49.7924	63.2872	122.658	119.359	100.635	61.0056	69.8053	67.3036	53.092	52.3579	48.5881	40.3416	42.0069	40.276	83.4903	70.7141	69.4808	0.000855491	0.527044
FBgn0038890	CG7956	3.8712	4.56105	4.10087	2.5997	1.2566	3.61791	0.856905	1.11293	0	22.4899	20.0657	18.5836	13.1304	16.1278	18.4733	21.4163	21.7063	20.8578	23.785	20.5264	18.3245	49.7829	45.4841	39.1295	0.000857842	0.15717
FBgn0036500	CG7275	111.868	128.254	127.271	127.088	105.867	94.8139	53.9761	60.767	40.8585	364.809	393.514	389.059	38.7119	50.5129	45.4988	46.9403	46.2865	43.8981	39.0726	46.2226	41.4945	39.756	38.0217	45.5796	0.000864022	0.423528
FBgn0027079	ValRS	226.362	204.66	218.003	146.789	162.448	134.709	113.419	93.8815	127.878	366.066	326.195	283.304	91.8595	91.4895	92.8471	87.2019	89.3525	87.9415	82.6995	81.6982	76.6129	89.5662	89.7151	85.987	0.000866166	0.516433
FBgn0030520	Pdcd4	319.797	344.205	318.401	124.551	211.232	234.196	180.372	197.385	146.591	1985.6	1743.5	1598.13	86.764	117.724	126.486	122.674	131.635	130.646	132.361	123.046	117.923	207.263	188.404	192.954	0.000873361	0.53374
FBgn0263979	Caf1-55	579.421	683.471	743.716	342.383	317.103	352.002	248.259	230.169	236.261	3108.96	2926.83	2808.79	347.939	351.187	360.666	329.626	331.696	313.174	311.965	305.165	294.747	337.962	294.015	312.533	0.000873395	0.356168
FBgn0267849	Syx7	131.098	129.067	112.195	66.4892	90.335	59.2475	29.5513	44.3369	53.3501	434.219	404.788	458.786	47.6047	72.4818	73.5001	75.3025	81.0642	83.2883	86.8219	75.2063	68.9685	85.4697	107.169	111.965	0.000875516	0.341708
FBgn0053303	CG33303	429.984	349.815	433.102	173.212	167.898	164.331	149.611	137.571	165.567	807.287	718.308	621.511	134.008	159.535	164.51	136.41	133.007	137.921	142.174	125.001	135.433	150.728	145.938	150.394	0.000877027	0.373278
FBgn0036908	TORIP	143.029	159.017	115.41	73.6915	34.7395	78.1041	14.1339	21.9685	0	282.658	296.194	281.979	58.3683	60.2506	62.6574	64.6903	56.3937	57.7924	51.3288	54.6184	51.0271	78.0931	75.2882	73.4881	0.000877077	0.0864817
FBgn0011606	Klp3A	210.494	186.379	219.738	146.654	129.456	101.258	103.757	92.0643	112.379	150.243	132.739	116.103	92.3366	99.4401	98.057	84.1812	86.7268	81.5483	76.6511	73.104	70.7268	132.344	111.71	106.409	0.00088215	0.499829
FBgn0030306	Spase25	458.621	376.037	472.403	203.151	217.086	219.618	164.97	158.902	173.27	1978.04	1756.77	1794.28	159.052	148.01	150.426	146.687	149.158	148.769	109.98	154.732	153.295	152.582	134.546	101.293	0.000885519	0.380352
FBgn0040465	Dlip3	11.1865	12.6798	16.2677	0	0	9.28049	0	0	0	99.4218	90.9893	105.522	9.48903	9.04863	10.4587	9.81706	11.8139	14.0225	15.9813	13.2272	12.7966	15.304	16.6282	21.3285	0.000891338	0
FBgn0014455	Ahcy	253.495	234.931	207.837	143.176	149.394	148.733	88.5014	76.0693	106.801	1160.39	807.607	847.987	712.919	702.874	691.428	766.503	763.369	742.524	696.374	697.885	720.542	522.37	585.498	611.422	0.000895295	0.389754
FBgn0028552	gammaSnap1	47.9961	62.9966	56.0542	28.293	12.0533	36.0825	5.32101	12.3518	0	24.9297	52.1698	44.2704	34.2674	30.3746	32.5879	32.2654	32.0052	28.2169	37.71	31.0249	29.8348	41.4143	41.6775	38.3601	0.000896144	0.105795
FBgn0025633	CG13366	91.0326	112.565	101.266	42.7188	46.718	47.056	28.5771	20.1999	38.6228	427.368	402.682	335.51	89.2525	102.685	101.832	100.513	112.339	108.602	131.878	110.995	111.434	270.26	232.9	229.133	0.000898545	0.286685
FBgn0037607	CG8036	1024.2	883.653	1069.89	883.148	900.032	887.913	510.327	472.283	463.654	3096.65	2437.19	1961.39	483.951	475.244	473.195	523.754	531.501	519.322	512.738	487.133	476.969	441.299	458.326	461.61	0.000909764	0.485691
FBgn0019936	RpS20	3699.45	2780.68	3113.68	1524.49	1608.52	1604.44	793.173	823.34	857.413	793.413	1041.98	942.285	10472.8	8437.41	8388.38	3909.43	3873.6	3890.93	1893.97	2058.72	1996.26	2990.81	3281.95	3367.89	0.00091335	0.257867
FBgn0002525	Lam	240.892	232.903	270.596	149.557	142.396	162.684	125.201	85.3604	105.408	1607.85	1372.7	1240.8	98.3373	118.054	119.739	147.502	163.856	165.138	186.325	166.291	170.815	213.207	207.554	209.616	0.000922696	0.424467
FBgn0003884	alphaTub84B	5082.71	4203.89	5511.66	2730.59	2851.51	2657.7	1467.15	1486.13	1630.02	26080	22187.5	24658.8	2328.96	2233.15	2204.88	2306.13	2179.63	2249.98	2162.14	2055.85	2108.67	1695.84	1513.24	1645.66	0.000932545	0.309719
FBgn0013278	Hsp70Bb	17.0533	23.8283	20.8223	10.9016	9.7741	9.50384	1.30812	2.1476	3.66149	16.8178	12.5457	69.0581	3.17855	3.07082	3.23716	2.61524	3.19804	3.41628	3.63946	3.04603	2.94521	7.0936	7.06147	6.15986	0.000936496	0.115345
FBgn0003447	sn	152.828	141.754	146.421	63.6461	78.6701	96.6819	40.8819	45.4112	73.5308	373.004	307.092	330.763	70.3734	81.5345	71.3065	89.8883	97.4681	99.3417	106.629	94.0387	99.0249	130.492	134.862	136.304	0.000937908	0.36241
FBgn0034999	Fatp3	112.18	96.4778	129.706	74.3385	59.2804	55.8925	30.8129	26.1892	26.1925	26.9502	20.1278	16.3944	63.3716	67.2598	68.9318	65.1684	67.7004	64.4374	67.37	65.3142	63.484	71.2081	88.1286	79.459	0.000939903	0.245872
FBgn0036816	Indy	132.448	150.376	160.223	112.946	83.4687	103.648	69.9068	56.8893	48.6739	327.303	259.198	248.832	62.5519	68.3195	74.6963	65.9335	73.9485	71.7369	73.7038	63.681	67.985	168.631	154.599	151.71	0.000947217	0.396052
FBgn0053499	Sdic4	145.429	144.91	195.326	79.9975	107.932	93.5327	15.6864	15.8258	16.2492	84.3236	56.144	302.515	39.2001	44.4481	42.9999	37.1807	39.8458	40.3273	36.4235	34.2031	36.4199	37.1519	44.6757	44.9344	0.00094854	0.0983422
FBgn0010660	Nup214	169.237	180.936	160.266	120.677	121.788	108.885	108.657	89.5463	93.4017	357	369.885	330.651	69.4313	84.4484	84.1907	70.9066	73.3038	73.8507	66.4315	59.3202	58.9873	129.113	108.815	105.302	0.000949458	0.571282
FBgn0035283	CG12024	0	0	0	4.25369	7.5516	7.66775	14.2873	10.555	10.0619	26.9809	26.0862	23.9274	16.5393	24.6127	26.4761	45.4809	43.4989	48.8901	46.6828	47.1965	50.6435	78.4769	98.6916	96.9711	0.000951676	#DIV/0!
FBgn0015376	cutlet	53.2898	44.2225	44.417	21.4777	34.9218	25.7068	15.8716	15.311	7.96684	18.6659	21.7615	18.4903	32.5083	37.7344	38.2487	33.9654	36.8996	33.6294	30.1336	30.3611	26.7639	61.3707	57.2178	51.3241	0.000951774	0.275837
FBgn0051950	Sbat	238.043	185.739	215.377	88.8807	88.8044	71.7529	23.8369	62.4317	53.1926	210.914	221.455	207.968	19.4827	24.3446	26.5734	24.9766	22.7807	22.5801	23.9407	18.4155	21.5696	28.6558	29.9163	26.0798	0.000951819	0.218195
FBgn0086558	Ubi-p5E	3617.31	4835.77	3526.77	1465.56	1551.37	1387.99	289.43	358.35	268.921	6961.6	6997.56	27952.6	1150.26	1586.22	1636.77	1849.15	2035.61	1983.48	1990	1820.08	1731.32	2520.16	2512.37	2500.76	0.000952794	0.0765203
FBgn0261286	Mat89Ba	70.3912	76.0159	58.6871	31.268	39.2405	32.3607	23.3736	23.9369	24.3592	386.297	468.422	400.294	29.6967	39.5125	39.2599	35.561	39.2511	38.2196	36.6602	30.7276	33.5676	71.3831	56.2712	58.6119	0.000960999	0.349448
FBgn0039557	CG12259	85.077	102.859	83.9108	49.1689	27.5183	40.5948	31.9071	38.2127	30.8573	101.388	89.7561	105.829	24.3325	30.5345	32.3551	23.0984	26.1938	25.2125	24.1961	21.3032	20.8972	39.5157	43.78	39.7471	0.000961354	0.371448
FBgn0265434	zip	73.7833	86.786	64.9781	29.0224	31.3112	17.6277	21.3384	18.2901	16.392	327.797	324.267	281.059	30.1513	27.369	28.3017	16.3992	17.1238	18.4479	13.8449	12.2809	13.1446	69.1659	60.4526	53.5774	0.00096144	0.248376
FBgn0027521	CG3679	106.61	108.464	94.1052	48.2137	56.0602	67.3127	49.2139	49.4521	34.2441	982.759	986.869	998.556	58.0265	90.7961	94.4335	105.592	115.689	114.333	107.384	107.105	98.7248	185.159	173.454	180.134	0.00096203	0.42988
FBgn0038968	CG12499	186.795	195.408	167.631	121.977	113.721	111.311	103.961	86.5371	81.5858	60.6054	65.2955	55.1001	122.604	136.73	138.473	92.1415	84.8804	75.8447	68.7858	66.3607	59.7717	131.243	109.462	109.011	0.00096413	0.494847
FBgn0263911	COX8	2519.39	2239.62	2770.82	1164.86	1141.01	857.799	613.815	524.97	0	2996.71	2903.59	2982.8	516.265	411.48	405.514	391.83	374.489	352.167	348.597	361.815	394.852	292.308	326.454	339.757	0.000969011	0.151237
FBgn0039338	XNP	121.4	109.957	118.377	73.7232	78.0717	81.8357	72.0909	54.6772	58.1201	223.872	260.919	227.224	86.047	102.352	102.56	95.2153	92.4204	104.171	94.8982	79.1812	72.1779	147.146	126.683	126.602	0.000969365	0.528653
FBgn0283681	Tcs3	49.5891	70.1396	61.8842	19.8471	20.6527	15.3651	7.62923	8.69891	9.3566	72.996	59.792	46.2619	34.7078	34.3149	35.8167	32.6904	35.603	33.105	41.079	35.953	34.037	55.9176	54.5431	52.283	0.000971864	0.141426
FBgn0034447	CG7744	41.4137	44.8579	45.8016	52.9172	54.2646	48.1161	28.3995	26.2719	30.4802	112.842	94.0969	80.2137	81.6978	105.383	113.248	142.37	151.709	147.306	165.006	139.51	142.97	252.286	242.771	226.975	0.000973664	0.64473
FBgn0045073	Stim	92.3689	118.239	115.147	50.7567	54.1903	59.9882	39.5702	36.031	35.1188	569.119	732.82	795.779	118.563	131.329	137.559	160.057	150.177	154.802	150.55	149.789	132.692	234.974	205.838	191.486	0.000974666	0.339888
FBgn0039600	CG1646	33.3136	34.4124	27.6774	19.1827	17.4841	14.1283	10.7744	6.53511	4.17179	123.143	188.346	175.509	22.9944	28.5158	30.1921	27.5118	27.8298	26.6334	30.6006	25.2867	23.7463	54.5232	50.9591	44.7767	0.000975087	0.225163
FBgn0284436	CCT8	953.767	795.199	1027.58	420.739	491.377	447.146	309.764	287.724	344.912	1690.57	1343.11	1074.44	499.727	499.3	475.498	503.715	491.364	491.236	481.959	469.969	471.564	396.982	403.609	402.529	0.00097553	0.339414
FBgn0039145	CG6000	362.706	318.031	273.961	150.424	154.039	114.507	62.6084	91.453	90.715	148.43	177.759	144.672	52.8424	68.0046	66.7189	69.4022	59.3203	62.146	66.3296	70.668	68.7911	69.9926	75.0418	66.2606	0.000977601	0.256391
FBgn0032746	CG10470	237.707	245.622	303.783	89.1238	101.8	138.069	82.5084	53.1705	51.7259	280.71	293.552	324.735	102.066	101.504	107.068	123.141	119.302	113.464	117.057	100.451	116.917	166.841	173.789	162.842	0.000984177	0.238092
FBgn0259704	Nsun5	58.3188	47.7123	50.8656	24.5861	23.26	18.8606	20.5625	17.0214	11.1681	84.6129	101.962	108.243	41.6378	42.5168	39.859	44.3366	43.6723	46.6855	50.8928	47.1848	43.8331	85.374	69.9222	69.0422	0.000985137	0.310727
FBgn0039566	CG4849	65.1625	75.3223	79.8191	49.3205	51.8867	44.9696	30.6546	34.9446	35.5042	240.438	245.53	239.755	43.317	46.1531	47.8292	40.6645	43.6089	43.3171	38.859	37.0767	34.6766	66.2061	62.9206	63.1238	0.000985987	0.458927
FBgn0024509	Sec13	180.08	143.981	166.102	65.4045	109.305	95.1197	65.5247	48.2601	65.6386	708.895	559.854	492.927	132.638	109.18	111.435	149.661	111.481	114.589	152.364	130.643	147.634	158.936	141.628	138.959	0.000987595	0.366049
FBgn0026089	CG14817	198.864	185.798	266.906	0	94.8497	81.1468	0	0	0	370.061	457.671	343.059	70.3212	77.5007	80.5489	85.8296	79.5688	89.9538	86.5032	93.0914	88.5195	128.49	120.761	112.835	0.000987662	0
FBgn0033581	CG12391	79.0706	97.6424	95.2924	38.4316	47.8358	40.1666	35.4479	33.1948	40.9377	435.094	393.641	412.104	45.7189	58.0221	64.9006	72.2517	75.3715	73.1272	78.7837	69.7916	73.3744	168.296	172.381	155.625	0.000992056	0.402861
FBgn0005777	PpD3	109.866	133.319	134.271	70.2795	58.8792	78.3551	43.264	30.2463	49.7299	184.039	181.524	174.981	89.9642	107.843	109.139	102.293	120.143	118.921	112.396	108.814	98.2878	195.119	209.998	199.078	0.000993465	0.326502
FBgn0061198	HSPC300	93.0447	136.006	134.479	72.4146	93.3746	53.0921	0	0	0	217.099	277.868	361.878	72.1448	81.8875	75.4786	76.1009	92.4042	97.4094	103.893	91.3387	76.4635	114.046	129.953	109.142	0.000999831	0
FBgn0052152	CG32152	11.1365	11.2073	9.10557	2.51748	6.32372	3.04559	4.70323	4.33887	4.22701	13.4907	14.6243	9.67717	6.64565	8.39139	8.03966	11.8547	10.8961	9.84794	14.0256	12.1997	12.2694	40.118	35.947	30.9405	0.00100048	0.421921
FBgn0266284	Ns3	124.652	117.205	102.51	61.7222	59.5655	63.8002	40.7382	47.8156	27.3542	253.962	197.904	181.369	48.8978	55.5035	54.2732	57.0891	58.4324	58.7641	66.7558	58.0846	56.4401	80.1425	87.2358	86.1869	0.00100209	0.336583
FBgn0002921	Atpalpha	549.835	452.367	442.69	252.08	256.918	273.2	191.779	181.286	163.576	1247.24	976.095	883.095	172.483	185.272	184.925	154.479	157.686	158.843	150.073	150.064	137.673	286.928	257.361	257.536	0.00100336	0.371405
FBgn0031314	IntS14	171.405	162.607	158.203	90.4175	90.3046	89.6905	70.2507	55.0224	89.6646	259.992	231.239	227.919	58.4123	62.3355	63.6231	54.0573	51.223	55.0842	46.8551	52.2105	41.714	44.2117	42.14	42.9176	0.00100548	0.436675
FBgn0033883	CG16935	144.107	120.332	117.037	49.416	47.5055	34.9211	41.9825	26.7675	15.1148	7.76156	13.8947	14.3134	41.4212	35.4061	35.7157	26.7623	26.5027	25.977	24.8114	24.3674	22.9448	44.0604	45.8149	44.7849	0.00100694	0.219843
FBgn0029882	CG3226	397.004	479.04	457.12	271.992	200.267	217.823	198.943	138.907	121.33	703.661	667.47	664.732	350.52	303.123	303.076	317.877	320.491	309.125	313.171	318.689	306.436	319.55	322.727	318.08	0.00101445	0.344429
FBgn0033028	hrm	31.3907	22.6359	28.6577	4.7268	9.06942	6.91558	2.11342	4.85299	0	226.353	258.181	180.56	33.3635	55.9871	57.2513	66.4973	71.1917	71.9195	71.8185	65.9804	65.3247	177.457	165.392	166.961	0.00101538	0.0842531
FBgn0025352	Mtpbeta	1087.46	900.406	1150.21	519.58	533.151	525.538	420.033	372.942	374.375	1852.23	1542.83	1273.8	305.092	302.744	302.562	234.702	234.097	256.199	233.88	228.938	214.431	268.305	280.659	281.777	0.00101581	0.371995
FBgn0032445	CG6153	108.305	116.586	101.315	69.1079	51.0916	66.862	0	31.6986	0	49.2645	61.7353	73.9429	25.8857	46.1491	47.0642	49.7643	51.1628	53.3947	52.3348	55.6375	52.1555	64.4576	73.9801	70.8083	0.00101677	0.0971734
FBgn0034176	ste24a	203.262	208.462	265.646	103.31	94.1576	122.66	48.6269	58.9155	49.1253	631.321	620.56	563.994	69.18	83.6427	84.324	70.6631	73.22	79.956	83.117	62.5662	61.5444	139.618	123.649	127.456	0.00102012	0.231288
FBgn0035165	CG13887	578.884	462.32	586.124	255.555	189.321	287.114	207.781	179.355	168.474	859.53	705.301	764.678	120.738	121.958	122.958	113.91	125.322	139.658	156.733	143.351	140.563	233.272	224.612	234.977	0.00102819	0.341425
FBgn0013279	Hsp70Bc	25.9983	28.7839	20.543	10.9804	14.4564	10.9123	2.01626	3.38683	4.71851	19.6836	15.0924	72.4306	3.35043	3.20273	3.44593	2.5197	3.71313	3.81226	3.72579	2.99781	2.98673	7.01007	6.61162	6.56776	0.00102845	0.134372
FBgn0036487	Prp31	185.143	157.808	202.13	90.1989	102.248	91.6553	42.9515	53.7651	68.2415	270.274	254.319	277.651	76.3167	70.7128	67.1575	65.269	62.1662	60.7841	54.1934	57.3821	53.096	67.624	60.3466	63.665	0.00103381	0.302631
FBgn0033762	ZnT49B	48.1121	59.4507	55.5346	29.5448	30.8024	37.2737	7.08581	18.4144	15.7625	160.938	168.094	142.498	55.0962	55.229	56.6079	53.5974	52.7794	57.3077	56.8563	47.8926	48.224	82.0127	65.9369	70.5448	0.00104447	0.252994
FBgn0034877	levy	2003.63	1730.83	2165.31	1014.54	851.987	899.598	695.456	689.041	392.487	3307.33	3307.38	2777.94	365.647	373.942	371.245	335.223	289.885	321.306	310.099	309.498	350.808	275.894	270.076	286.41	0.00104458	0.301195
FBgn0035033	CG3548	77.1365	83.5709	95.5369	68.9931	74.4449	61.0443	39.4912	31.5985	35.8612	38.8168	38.4757	33.4164	44.2672	48.8535	48.8318	52.3924	50.3676	45.5526	44.1254	37.5766	41.2562	82.8406	90.8518	87.0782	0.00104999	0.417379
FBgn0038649	CG7718	20.577	16.4991	19.267	7.93136	12.9837	15.9203	8.21574	5.94957	5.92438	21.8061	19.9889	17.2146	29.6406	33.3865	38.3616	44.6983	46.4907	48.8442	59.4912	47.118	44.4881	105.534	104.784	98.2839	0.00105114	0.35656
FBgn0266581	pit	241.803	225.778	294.442	132.83	111.45	125.594	71.9097	63.3141	81.4878	344.147	339.618	382.694	51.4601	55.7069	53.979	48.2623	47.6988	45.1829	51.7577	40.3657	44.4034	88.3534	87.8581	86.7504	0.00105223	0.28439
FBgn0024352	Stip1	242.862	226.384	182.015	102.507	88.9849	102.933	52.5979	66.4009	46.7319	516.375	476.828	422.232	162.195	206.322	209.113	252.065	277.166	276.313	297.066	271.521	263.512	431.476	466.468	463.301	0.00105941	0.254477
FBgn0032242	CG5355	342.882	308.766	263.931	136.686	125.579	122.104	100.039	70.7032	104.235	536.875	607.798	536.255	137.916	134.82	137.21	124.963	129.775	127.966	127.672	115.751	108.758	208.025	188.225	182.09	0.0010595	0.300332
FBgn0032701	CG10341	47.1595	50.0046	52.2634	33.2241	22.9506	21.0805	15.9062	19.5044	6.20256	72.756	80.2639	94.3448	26.9519	28.505	28.8542	25.5337	26.4349	23.372	23.6399	22.0289	22.6507	33.2851	34.4468	33.9719	0.0010601	0.278484
FBgn0035333	CG1317	89.3761	85.6286	105.982	47.5677	59.1529	61.3944	41.3341	32.7523	33.8799	208.935	196.014	147.206	29.5261	31.7608	33.0246	27.3543	27.043	28.9238	28.1921	24.7186	24.0184	57.1909	49.1695	49.4574	0.00106491	0.384239
FBgn0032880	TM9SF2	74.7992	71.4683	54.8038	42.9211	31.4293	39.7623	15.9126	12.4821	13.8435	221.254	209.277	190.589	43.0003	62.9532	64.851	63.501	68.0886	71.7195	69.6169	59.6951	59.7835	144.316	126.938	133.387	0.0010742	0.210065
FBgn0039558	BCAS2	180.187	188.165	227.917	86.1978	59.6151	78.0764	55.2101	61.0904	75.625	739.195	684.07	631.821	57.3939	60.2213	57.1739	59.0442	59.6568	56.934	59.1783	64.2184	62.874	55.016	53.4215	59.3482	0.00107686	0.321878
FBgn0250753	kra	895.498	1115.21	847.535	574.28	516.287	473.901	174.921	271.315	201.287	2635.45	2852.21	2810.86	845.827	907.199	922.147	1042.69	1041.89	993.079	997.928	916.018	862.514	1405.73	1209.24	1189.74	0.00107788	0.226545
FBgn0259979	Cndp2	257.283	255.022	210.847	82.8135	93.5803	94.8355	53.0133	74.9312	16.0481	622.207	695.641	672.019	85.7532	128.443	132.939	137.385	156.69	146.712	162.841	140.3	139.772	381.104	373.948	339.563	0.00108142	0.199118
FBgn0085423	GramD1B	48.7001	55.8839	50.1177	45.4266	41.8765	41.767	22.54	28.7285	28.3836	26.4731	30.9344	33.8251	31.332	36.2337	38.1544	28.6178	31.0669	31.5506	31.8859	32.162	30.1701	64.5868	61.2008	59.8682	0.00109631	0.514876
FBgn0051472	sgll	143.461	139.459	132.395	85.0348	47.6649	111.521	71.5115	38.8455	52.9783	176.319	157.896	128.01	90.534	88.1034	86.0453	73.7504	74.9227	73.5578	81.9578	75.0714	70.93	87.0557	90.2081	89.2811	0.00109799	0.393281
FBgn0034406	Jheh3	24.8217	26.4691	29.1964	15.9025	6.69359	15.6603	3.38964	10.1944	7.5726	104.501	60.3345	55.4937	17.1593	19.2898	19.3193	22.5556	25.2822	23.2023	23.1046	25.2903	24.6866	25.0061	22.5154	24.2242	0.0011032	0.262858
FBgn0034618	CG9485	26.2741	25.3148	25.9332	21.4624	23.9723	17.5207	12.4256	13.0663	16.8228	21.1094	20.7825	19.1697	35.1661	42.124	42.9324	49.3318	51.0974	51.0505	53.8056	47.4318	45.6163	107.168	103.553	92.6406	0.00110758	0.545841
FBgn0034961	CG3163	84.7969	110.373	103.006	51.3141	36.7606	53.9042	21.3857	28.1475	34.6382	71.8956	90.6831	100.785	30.7053	38.7134	35.978	31.3732	35.8089	35.0973	41.6396	34.6082	36.866	43.0135	44.1828	41.9051	0.00110783	0.282288
FBgn0001139	gro	112.044	144.819	126.533	62.0277	80.2678	75.0038	28.5604	44.2223	42.1268	782.69	657.543	721.845	89.3825	106.212	111.284	110.779	128.399	125.928	132.039	112.064	124.575	186.683	190.503	191.074	0.00110848	0.299715
FBgn0039175	beta-PheRS	184.604	170.166	209.956	128.246	126.129	109.213	90.6202	81.7642	90.7004	104.884	89.4158	62.561	84.8419	100.931	98.3284	84.9559	86.931	80.9039	88.026	78.3395	78.9823	84.0458	87.9335	82.322	0.00111037	0.465863
FBgn0034734	CG4554	11.931	13.2867	12.6048	10.4344	11.3148	8.98659	7.56836	5.52527	5.75999	65.9247	69.0899	53.3551	11.5941	13.0441	13.2791	11.532	13.464	12.6162	12.5839	10.8003	10.7683	48.6271	36.1948	35.4606	0.001111	0.498476
FBgn0038461	CG3678	391.558	547.072	475.939	270.214	208.384	242.531	68.4173	101.134	91.082	818.377	815.96	1274.77	217.224	201.527	192.767	213.362	183.837	198.501	202.633	176.738	177.842	248.712	234.837	255	0.00111634	0.184249
FBgn0011260	Sema2a	212.038	268.23	210.683	154.28	155.842	169.008	64.011	75.8031	58.7241	893.257	758.251	869.504	69.1281	88.4459	93.2224	78.1107	82.1246	80.9047	71.0888	68.3593	66.0252	120.108	89.6949	98.7895	0.00111669	0.28734
FBgn0004509	Fur1	65.2308	68.852	75.9103	69.8904	54.0528	25.3786	36.729	27.9433	24.4113	85.0181	74.6394	74.5654	40.9925	37.8499	39.7072	41.8569	44.5261	43.3927	36.9381	35.6042	37.0048	49.4723	47.9215	47.0123	0.00111953	0.424222
FBgn0261279	lqfR	94.1582	87.3977	78.5518	66.9325	66.9053	63.9285	41.7708	29.8046	40.6054	117.933	111.398	122.871	52.5162	68.2583	64.8422	81.9854	87.6671	84.1131	85.3429	77.3609	79.4539	178.386	173.561	161.088	0.00112805	0.431286
FBgn0267790	rump	471.77	464.702	384.454	267.739	287.174	281.931	202.982	208.308	207.715	1718.75	1760.85	1597.7	94.9784	101.846	106.145	71.101	102.242	101.004	72.4249	93.8448	90.3753	114.896	112.866	114.85	0.00112939	0.468613
FBgn0263993	CG43736	33.0087	43.3114	40.9012	23.4786	28.8247	17.4036	11.9368	12.8753	13.625	304.011	211.409	293.927	36.7808	40.6934	45.9619	58.355	62.6211	62.0457	65.5662	67.3776	61.1263	113.945	127.537	121.113	0.00113049	0.327901
FBgn0038475	Keap1	7.49824	6.86182	7.27756	2.3684	3.81133	5.08039	2.42921	0.962224	0	23.044	21.487	30.3835	5.06523	9.39478	9.8457	8.7795	9.33521	9.6431	11.1582	7.79081	8.62518	24.6828	20.7009	23.2678	0.00113709	0.156738
FBgn0035679	CG10467	100.007	75.83	85.6719	37.8404	32.5491	28.786	29.3181	23.8086	19.6608	44.3083	46.8297	42.6236	40.8154	34.8937	35.2537	33.2107	38.5098	37.1973	36.9707	37.911	32.6705	38.4168	37.384	40.8042	0.00113737	0.278336
FBgn0037566	mRpL1	94.0291	90.8496	117.041	49.4069	39.8019	41.9076	25.6942	25.1319	33.7152	64.0332	80.6575	52.7542	92.604	91.6693	100.108	108.863	97.9384	100.815	112.766	93.017	106.452	113.841	124.033	123.31	0.00113806	0.280013
FBgn0030507	CG11164	165.625	160.778	206.733	81.2013	97.5913	99.1932	42.0427	55.8613	54.8071	545.773	479.92	614.48	83.2026	88.3854	91.1942	95.7255	92.8798	100.225	90.1493	89.4988	84.6562	161.394	151.218	139.085	0.00113953	0.28644
FBgn0004106	Cdk1	660.668	564.161	574.014	357.448	293.119	306.414	182.816	224.37	80.7565	1794.02	1925.22	1946.8	188.836	223.049	229.233	264.253	255.866	250.736	279.99	247.03	246.806	386.314	317.954	312.296	0.00114172	0.271253
FBgn0285937	Rab1	484.996	592.456	469.38	347.327	337.812	386.887	193.43	198.663	183.835	2467.83	2590.53	2449	165.661	219.655	232.053	237.842	245.998	251.096	277.889	234.445	228.322	362.37	332.391	343.199	0.00114354	0.372328
FBgn0015379	dod	460.229	347.432	414.468	244.485	184.019	174.056	126.652	118.913	142.627	678.247	648.007	687.603	73.361	89.8648	89.0273	71.5322	78.4498	85.0947	85.3076	77.7859	89.3893	100.834	110.126	117.951	0.00115045	0.317636
FBgn0033555	RpS15Ab	526.631	554.062	499.682	465.72	713.686	521.614	359.78	336.375	380.558	754.179	829.426	1235.81	1809.42	1607.29	1535.97	1629.51	1690.5	1530.11	1547.84	1637.08	1597.11	719.997	764.169	741.871	0.00115145	0.681303
FBgn0004687	Mlc-c	159.091	144.307	189.826	41.7127	45.5815	60.4746	51.5048	43.8708	54.6951	952.407	873.952	888.105	68.5906	76.7271	83.8332	91.6666	104.41	108.149	127.604	117.726	123.336	137.101	132.014	145.009	0.00115208	0.304265
FBgn0022343	CG3760	312.51	255.29	330.121	125.941	143.633	132.547	115.014	88.6972	85.1889	166.67	148.165	128.321	107.095	136.123	148.588	152.541	150.287	163.533	182.568	149.825	160.631	192.504	225.842	205.027	0.00115275	0.321743
FBgn0028582	lqf	87.3252	107.901	113.049	46.4322	90.6747	61.4461	36.605	35.5592	39.0565	75.4328	68.2524	58.2958	47.3718	53.866	49.5058	54.8894	57.1359	59.2201	57.6884	53.7778	51.3763	106.063	97.6453	95.7195	0.00115765	0.360783
FBgn0029113	Uba2	346.423	307.796	276.302	211.724	254.444	210.397	147.043	133.858	135.421	540.201	535.831	508.839	182.564	192.588	187.096	195.367	196.971	187.33	176.856	174.151	167.945	240.061	220.717	225.524	0.001161	0.447408
FBgn0010877	l(3)05822	221.356	214.736	214.853	176.991	185.316	158.554	134.994	141.62	162.394	228.846	211.556	230.727	88.7423	95.124	93.1848	83.5489	92.0996	95.8705	95.6868	87.4117	81.0207	181.724	190.512	191.239	0.0011647	0.674416
FBgn0285951	mRpS34	172.759	182.672	147.632	96.0939	70.9331	56.9556	58.9017	46.182	21.3441	135.809	131.88	115.578	66.8473	71.8512	69.8021	72.759	68.6516	71.4484	86.2131	82.229	76.5995	66.2941	64.155	61.2489	0.00116586	0.251316
FBgn0266449	Kr-h2	133.169	125.785	174.622	69.6628	57.8225	77.6792	0	20.4055	9.27827	83.2501	88.3946	58.3495	37.829	55.1207	54.372	53.293	65.2619	59.4521	75.5374	69.031	61.0491	107.662	123.406	116.868	0.00117311	0.0684628
FBgn0032783	CG10237	461.866	389.213	471.156	306.663	287.406	257.88	82.2486	167.025	155.183	1021.45	960.262	935.266	190.676	190.338	193.855	205.357	215.258	218.19	208.314	206.55	219.327	317.98	338.159	320.678	0.0011752	0.305889
FBgn0266268	FeCH	269.739	228.836	196.124	110.327	106.94	95.661	55.212	57.7143	53.7967	25.7389	38.7985	25.725	81.5243	77.5926	75.2661	64.3179	62.4743	66.6468	68.1193	58.713	60.1916	88.9777	105.47	96.1515	0.00117599	0.239993
FBgn0036915	Prp3	196.094	226.284	168.064	98.1449	91.2302	100.858	59.8901	53.5239	42.517	118.169	110.202	123.529	72.8279	84.1472	79.1412	57.8019	68.0007	63.9227	64.6734	55.5177	53.9561	112.844	110.063	106.85	0.00117848	0.264092
FBgn0038772	mdlc	110.655	121.314	152.48	82.1149	21.1281	60.7426	25.7379	23.1406	15.0187	30.8382	49.6611	52.4056	63.269	74.0183	70.5939	67.3565	72.3074	70.7315	67.7499	56.8205	64.4457	107.97	123.701	114.024	0.00117924	0.166205
FBgn0032524	Hacd2	119.883	133.712	107	65.679	32.2651	61.8561	29.9588	27.2475	0	176.461	163.161	174.349	81.4004	72.3198	72.2327	48.6074	45.6635	41.4405	36.7785	34.917	34.617	47.9598	38.2109	41.9316	0.00118858	0.158644
FBgn0033712	mIF3	175.581	150.059	140.911	73.9194	75.2476	96.8337	42.2697	57.5645	64.2906	128.568	132.777	156.784	35.9416	42.1141	36.3131	41.0699	41.8563	38.8469	32.9912	31.3557	37.7581	58.4809	61.3912	51.2156	0.00118883	0.351783
FBgn0031231	mRpL10	158.474	117.442	137.297	45.6454	63.5177	38.6295	30.1599	42.6	28.3499	121.059	109.087	136.655	89.0198	91.7402	94.8887	108.191	105.123	115.956	106.243	108.935	108.299	124.729	138.355	128.68	0.0011973	0.244692
FBgn0250838	roh	770.573	663.596	869.616	216.249	227.08	260.524	0	162.841	161.305	3321.99	3369.42	3413.62	186.371	167.059	226.83	186.258	201.979	217.9	254.416	239.882	278.939	339.782	347.041	354.217	0.0011986	0.140702
FBgn0030500	Ndc80	132.739	101.92	136.423	65.2167	59.0092	56.4429	36.3016	31.4946	28.9446	45.0704	38.8318	30.4429	69.1068	74.7895	71.5364	61.8458	59.5484	62.7094	62.5376	53.7432	53.6038	82.9748	78.3323	73.8753	0.00120401	0.2607
FBgn0039691	IntS11	32.7946	36.4176	33.0625	3.72126	10.6117	12.9712	7.73004	13.6782	3.61924	348.186	378.487	349.372	47.6151	56.8429	57.7814	65.9765	70.4745	64.9332	70.4799	71.9919	63.3747	81.5263	82.8853	85.8576	0.00121066	0.244709
FBgn0033473	CG12128	90.171	88.9703	83.9794	79.6195	56.8677	50.1915	54.0747	38.2105	40.4486	144.584	130.524	171.9	57.2692	63.0088	63.3931	71.8381	67.4825	65.0746	60.7991	63.0205	58.4232	85.842	86.5751	85.9821	0.00121128	0.50446
FBgn0033241	CG2915	176.146	195.456	178.334	134.999	108.461	91.882	75.5752	77.1726	106.743	557.782	527.638	465.86	163.602	167.027	172.002	154.579	164.91	164.665	156.273	151.337	146.849	137.541	144.844	147.451	0.00121429	0.471857
FBgn0032216	Usp14	646.338	821.846	834.152	314.278	300.846	358.355	283.299	243.592	220.966	246.663	230.972	195.897	319.371	340.981	344.724	268.888	270.792	257.063	270.136	258.481	245.153	346.339	366.405	332.146	0.00121562	0.324825
FBgn0011704	RnrS	1036.99	1086.87	1290.14	667.456	672.635	625.868	519.632	443.906	477.413	7673.06	6830.42	5395.82	416.979	484.479	494.596	517.726	548.968	552.225	571.841	522.494	525.427	703.645	694.625	735.79	0.00121967	0.42207
FBgn0027592	MED15	102.445	115.968	95.9589	50.0196	52.3147	52.5859	48.0253	48.1169	34.0802	379.264	378.794	400.203	41.2649	54.0718	55.1686	55.1652	56.7289	58.261	57.1977	50.7385	49.7093	93.2375	75.833	78.8139	0.00122368	0.41423
FBgn0032705	Grip71	177.707	153.107	149.165	101.701	99.7396	65.5396	47.917	37.9397	70.8582	67.2046	70.7966	64.2625	70.1882	89.57	91.5201	76.5543	82.1452	82.0956	80.1899	76.3144	76.6045	176.406	177.264	167.694	0.00123227	0.326504
FBgn0032244	RfC3	198.368	200.972	159.315	107.613	106.664	73.8345	35.9603	69.2183	49.3098	220.593	206.109	193.127	71.6835	79.7253	83.6178	83.7451	77.612	77.183	84.4788	77.5199	81.4063	122.404	107.708	108.836	0.00124758	0.276536
FBgn0040087	p115	91.7319	87.0174	87.8181	33.2056	60.4669	50.2357	51.9976	36.5628	33.3666	140.813	142.255	131.864	52.1585	43.7621	42.8889	34.9933	34.9371	33.7904	41.285	34.1374	32.8899	46.0456	36.584	38.7204	0.00124779	0.457396
FBgn0002284	Prosbeta6	1046.49	898.217	925.151	430.183	418.933	409.892	396.74	410.458	532.69	4027.55	4377.86	4073.37	499.675	460.838	464.054	454.428	453.576	451.172	503.555	467.254	469.751	461.805	414.685	460.897	0.00125233	0.466883
FBgn0039702	Vps16B	71.3623	58.5045	70.5036	48.0963	49.7023	28.1976	30.0502	19.0146	23.7339	77.6962	69.5027	49.9612	44.7297	41.1714	39.8615	37.8979	38.0079	39.4733	35.6042	37.1685	33.6414	44.5038	47.3626	46.2811	0.00125257	0.36332
FBgn0028992	sds22	327.753	367.32	375.534	243.348	166.336	221.21	168.797	210.916	206.551	823.587	818.637	813.287	130.159	116.475	111.256	88.7258	86.0975	83.4296	99.5406	91.8523	73.0009	99.6508	84.3762	93.891	0.00125725	0.547599
FBgn0051453	pch2	143.03	116.959	110.716	57.5908	59.6515	67.7426	30.9762	34.051	44.6696	184.463	156.24	149.729	139.289	139.105	143.749	130.66	137.343	137.956	142.068	135.452	125.891	161.959	144.84	147.305	0.00125797	0.295914
FBgn0003346	RanGAP	284.334	309.658	236.546	148.44	164.068	148.764	97.9445	97.996	71.547	834.319	860.725	842.859	93.5157	116.409	116.245	100.605	105.026	101.676	94.9234	87.4252	82.4908	169.905	171.722	164.86	0.00126348	0.322065
FBgn0019972	Drice	178.177	165.292	206.693	129.459	101.493	103.287	75.9353	71.8896	86.6349	554.832	512.752	592.832	69.0191	76.818	83.5405	88.2487	88.1164	89.6367	95.7617	94.2151	97.2857	115.117	123.157	126.96	0.00126532	0.426165
FBgn0020369	Rpt6	2357.69	2175.64	2754.62	1334.73	1213	1301.56	1082.41	893.645	963.054	2604.56	2340.16	2167.32	406.946	375.819	355.51	292.682	304.264	314.609	319.348	289.12	288.125	293.131	264.762	266.85	0.00127984	0.403283
FBgn0265137	Spn42Da	74.5985	69.0027	85.9827	39.4708	14.9621	32.5158	15.9192	13.9011	29.632	63.6126	45.3835	63.2669	36.8048	38.3179	41.0286	33.3579	35.6622	37.7049	36.089	35.9169	34.2902	54.8694	53.3491	46.8103	0.00128047	0.258957
FBgn0037482	CG10055	59.7799	62.7512	54.0996	15.1812	37.2318	33.7986	29.2594	27.9589	18.787	62.8915	58.0752	44.5778	30.2316	48.0401	48.1307	46.9212	54.7227	54.0591	53.3374	43.5012	49.4872	119.821	119.362	108.589	0.00128448	0.430306
FBgn0034051	Mlf	356.955	270.526	360.037	169.367	186.467	191.257	70.9012	98.8074	65.1391	1558.36	1430.64	1609.3	69.6517	123.268	121.684	112.01	134.699	135.068	127.969	120.826	129.74	231.704	241.516	253.156	0.00128623	0.237816
FBgn0051852	Tap42	390.648	402.816	360.584	264.037	236.603	243.257	147.602	195.639	219.022	557.843	550.511	541.38	120.428	107.279	103.85	84.49	88.0019	94.8253	71.1891	78.6739	77.6114	88.2889	82.1528	80.1552	0.00128883	0.48721
FBgn0035980	mRRF1	26.7803	33.1774	37.0925	9.14402	18.0173	7.35632	7.016	2.93972	7.20137	46.9647	54.7136	55.7562	26.9878	28.7152	29.0019	30.9066	34.399	32.9665	35.7099	35.6315	31.166	48.7906	48.6832	45.2307	0.00129796	0.176786
FBgn0035482	CG14985	18.5159	12.0943	14.5171	9.31724	11.8365	6.01535	0	0	0	124.877	192.436	138.139	44.3001	49.1972	48.1724	61.625	50.8095	57.4142	59.5445	61.4597	55.8151	65.5318	61.9447	62.6973	0.00130253	0
FBgn0031228	ND-15	184.936	222.015	202.524	43.7128	56.3845	73.8329	0	60.3652	0	1316.47	1348.26	1340.04	143.991	187.769	163.206	178.526	180.982	177.099	168.675	178.348	180.154	254.137	243.353	258.414	0.0013051	0.0990446
FBgn0023527	CG3071	48.3805	51.7441	57.7225	35.0133	33.48	32.2743	21.7957	27.2157	28.0095	381.713	336.9	379.808	72.801	87.4824	85.2087	95.7822	105.566	103.276	111.242	101.626	96.4404	134.93	135.992	132.203	0.00130906	0.487946
FBgn0027950	MBD-like	91.7951	89.3586	108.928	52.7779	51.6009	36.9148	38.5602	34.3672	20.7796	675.003	587.727	613.765	46.4506	66.3648	66.5422	78.7036	74.9573	68.7095	73.9146	79.6246	74.4242	78.6875	79.2018	85.5471	0.00131491	0.323037
FBgn0034576	ND-B14.7	143.289	132.44	163.507	56.7934	28.4641	37.4321	0	41.5312	0	633.051	642.668	581.211	92.6929	105.212	101.243	112.378	111.96	113.186	99.8916	115.812	114.346	102.406	112.331	122.115	0.00132311	0.0945533
FBgn0027565	CG5498	77.3402	80.3727	58.5092	34.0419	38.2532	36.2131	11.465	10.0464	18.6793	24.7287	25.4916	20.3252	44.3637	63.39	60.1832	51.5821	59.4514	55.2174	61.2062	52.7454	53.8364	114.442	119.122	108.652	0.00132925	0.185877
FBgn0032393	Nfs1	46.7346	53.4652	52.6516	35.4092	23.0689	39.6768	23.6788	18.019	27.5659	136.077	105.182	121.883	65.4487	81.2168	80.3726	94.6555	91.7161	96.2327	112.067	94.8444	90.7119	92.304	96.7186	98.9919	0.00133453	0.453144
FBgn0283468	slmb	263.57	267.305	326.472	160.556	195.731	193.354	126.786	104.183	113.9	243.837	229.268	168.934	145.002	171.691	172.927	147.347	157.334	156.107	158.831	145.4	138.248	265.798	256.024	249.54	0.00133475	0.402252
FBgn0027526	Ublcp1	202.936	183.92	212.873	123.955	85.6623	119.414	74.2312	107.395	70.022	682.518	855.022	871.585	107.301	104.315	113.898	102.984	96.1425	96.2774	95.2409	87.4592	86.3676	139.49	127.808	133.07	0.00134168	0.419604
FBgn0037358	elm	80.3076	64.4717	92.9205	17.4125	20.4636	35.3263	0	13.5333	0	162.719	154.201	111.913	81.4901	87.8978	91.1364	115.518	123.52	120.797	146.224	122.594	102.982	149.499	156.451	151.412	0.00134831	0.0569345
FBgn0023477	Taldo	302.069	346.015	392.416	264.876	186.769	206.919	128.516	144.902	119.643	1253.51	1089.43	954.19	225.672	228.733	243.402	262.221	255.852	265.825	283.765	267.092	266.877	285.695	283.897	291.116	0.00134957	0.377763
FBgn0033521	CG12896	23.5462	31.0773	36.2092	17.5341	25.3782	0	0	1.84145	0	28.6609	35.3149	94.7842	3.25107	2.4826	3.70782	2.70532	2.81084	2.29203	2.13567	1.391	1.42749	4.90976	5.4853	5.37367	0.00135153	0.020273
FBgn0037440	CRAT	31.8358	30.1001	22.9083	14.9642	12.795	10.1039	2.7853	6.44358	5.42252	76.4969	72.793	65.7889	18.0586	19.7393	19.9608	17.3273	18.1124	16.3741	18.0537	16.558	17.5966	28.7813	24.4246	23.2634	0.00135424	0.172686
FBgn0260008	UQCR-11	1228.36	1559.08	1394.71	0	632.505	647.464	340.894	549.43	273.661	3975.47	6007.14	5260.31	193.323	243.244	241.093	287.631	270.375	270.73	361.773	312.063	302.102	529.861	379.745	348.467	0.0013546	0.278322
FBgn0029818	GAA1	45.254	48.2804	54.892	33.9652	34.4169	31.9646	21.58	26.5293	21.2869	34.3636	27.2016	21.7719	73.3451	79.8589	77.7792	83.7992	88.2267	88.8733	91.2228	84.1343	84.8472	76.9734	77.6161	73.1896	0.00135825	0.467546
FBgn0032864	CG2493	523.513	493.968	598.927	249.988	233.881	264.761	271.468	201.296	193.071	829.813	751.565	696.616	114.008	140.001	132.42	107.798	96.5733	98.4856	99.1987	101.869	95.9647	83.4764	71.6915	85.8002	0.00136673	0.411923
FBgn0029503	CHORD	260.386	185.008	250.619	76.0953	82.9453	68.3382	23.3372	49.2764	20.7006	113.343	130.729	159.774	42.0621	52.1804	54.7716	44.5182	43.6546	44.8666	49.5068	38.1938	36.7822	72.7166	64.0273	66.6283	0.00137468	0.13407
FBgn0034791	EMC8-9	488.55	427.29	580.48	103.139	161.729	160.284	119.42	154.917	137.524	1199.03	1221.88	1213.02	123.414	123.473	130.313	126.283	132.79	122.161	132.653	135.897	138.836	141.301	130.819	131.393	0.00137989	0.275249
FBgn0027492	wdb	211.065	236.648	247.754	206.336	184.724	167.169	109.055	106.359	66.9785	569.428	551.942	483.781	91.7515	97.3928	106.085	82.8325	83.6319	80.3907	64.3381	73.7386	65.6463	111.151	111.217	106.549	0.00138125	0.406047
FBgn0029936	CG4617	92.5307	77.3165	85.2808	74.4318	32.0076	43.9447	37.4658	30.7116	18.4063	61.0819	59.4501	51.5895	37.3009	42.7498	42.9787	31.0279	40.4256	37.4907	42.0219	35.1242	36.1854	64.3015	71.7031	67.5297	0.00138128	0.339374
FBgn0026879	CG13364	2060.33	1935.45	1645.36	852.823	940.654	650.289	546.755	747.431	346.002	3203.07	3363.93	3229.24	303.024	335.976	342.368	315.485	294.417	324.522	281.634	300.08	332.202	375.542	346.632	364.818	0.00139227	0.290754
FBgn0029929	CG4593	71.9787	64.2098	78.0312	35.8026	44.2956	35.3177	35.6344	24.4005	31.6162	26.0508	22.8478	18.4256	82.4946	92.6518	98.6666	112.856	104.155	115.818	117.675	110.638	103.781	127.444	141.452	125.298	0.00139422	0.427837
FBgn0013770	Cp1	5828.01	4976.13	6832.01	2692.69	2220.19	2738.54	1688.76	1594.12	1658.39	11559.3	8057.2	7637.93	851.069	848.167	842.996	719.488	703.936	715.172	678.252	644.521	623.945	757.795	645.06	721.22	0.00140278	0.280179
FBgn0015795	Rab7	477.508	479.04	573.189	372.267	310.909	433.043	217.962	195.402	126.361	308.151	362.219	322.401	90.7794	110.363	111.236	136.281	127.929	123.528	121.287	109.915	120.676	148.338	165.67	152.841	0.00141219	0.352822
FBgn0025832	Fen1	202.331	172.427	180.695	126.087	79.1459	115.884	83.0038	84.8367	50.4203	76.0745	57.9714	43.4004	94.2069	99.9336	97.464	99.0862	102.171	94.7833	95.0044	96.0894	92.6106	83.9266	95.0012	94.2986	0.00141537	0.392942
FBgn0039019	HP1c	223.014	171.978	217.48	136.475	103.859	101.727	80.5387	64.4192	70.8601	384.854	366.874	396.78	52.5808	61.2313	63.2923	78.4257	68.0336	62.2955	64.5939	67.0777	61.6346	65.2886	66.995	71.9225	0.00141958	0.352372
FBgn0003392	shi	196.715	189.708	175.25	96.9369	141.305	137.67	35.4466	78.0622	78.9917	204.169	210.876	198.999	54.5246	62.0364	62.4791	60.525	60.4902	58.8976	58.9019	53.112	51.2972	114.49	101.354	98.3532	0.00142792	0.342727
FBgn0030433	mRpL49	110.128	130.154	106.581	59.9685	33.5835	67.8507	47.2463	38.9186	55.3167	90.5486	86.4014	71.9374	80.52	87.7378	81.2374	77.7727	78.7978	77.2192	87.6639	80.3556	80.5397	96.3787	84.8758	90.2203	0.00142983	0.407889
FBgn0035252	CG7970	75.6291	91.6966	85.9619	66.8013	48.813	57.852	21.2079	23.6747	0	1122.89	1180.93	1115.81	71.3242	79.4106	83.4077	105.06	100.693	110.613	119.541	108.057	109.243	135.597	139.37	144.617	0.00143131	0.1772
FBgn0040396	CG3939	169.72	183.469	206.714	51.0107	47.057	68.309	40.9749	55.1336	0	208.763	213.131	202.149	105.31	115.662	114.037	101.091	106.576	111.49	119.176	106.489	116.678	116.348	122.897	102.985	0.00143644	0.171652
FBgn0038462	CG17556	497.86	651.827	504.733	327.559	257.233	303.678	125.84	170.884	122.45	935.093	1031.96	1624.49	202.62	201.249	192.857	200.924	192.072	202.074	186.255	174.336	179.684	244.157	251.911	262.445	0.00143651	0.253366
FBgn0025186	ari-2	18.0626	20.2013	18.1851	13.4113	13.409	13.4337	12.183	11.5173	9.88243	508.537	438.333	416.476	15.7119	25.8126	26.6353	39.4505	43.1998	45.7884	52.4279	47.9377	49.0658	79.5799	77.9792	75.6732	0.00143754	0.594922
FBgn0033556	CG12343	212.933	163.272	178.759	103.663	66.3627	80.5924	70.9216	65.9378	53.9234	364.276	375.395	387.679	41.5704	46.7665	44.3184	47.5905	46.8558	48.3272	41.2188	49.0247	42.6314	84.6582	76.1817	70.1271	0.00143988	0.343775
FBgn0022943	Cbp20	157.722	139.234	179.332	106.883	90.4573	76.8258	63.0766	51.1311	67.4897	762.408	819.977	877.038	77.7642	83.4893	82.4465	89.3784	99.4969	101.354	114.476	97.3911	96.7251	119.486	120.125	124.315	0.00145125	0.381487
FBgn0034422	CG7137	69.6977	61.4395	55.0579	26.9661	33.1679	23.363	13.8977	13.2021	25.0677	50.1895	65.9166	86.163	41.3013	43.803	43.6917	54.2984	51.5389	51.3945	48.8403	54.6547	54.9933	76.9753	83.6854	81.9543	0.00145184	0.280177
FBgn0037810	sle	176.022	201.643	149.242	107.916	111.024	112.185	54.6743	51.6964	33.3611	204.555	179.334	197.795	156.74	184.687	194.493	169.723	190.573	172.273	167.801	137.368	136.877	400.772	354.939	329.396	0.00145246	0.265193
FBgn0013269	Fkbp39	484.117	518.199	611.462	267.722	298.465	266.523	169.836	211.959	235.026	2702.62	2669.8	2422.93	278.564	340.711	375.593	372.184	396.044	387.839	373.346	346.902	348.817	566.499	578.307	587.479	0.00145407	0.382221
FBgn0032465	Yip1d1	87.5409	86.5976	118.409	53.0441	34.7028	52.6574	0	0	16.4121	58.9559	62.7119	57.3719	28.9039	34.6615	37.6561	40.2526	36.8577	41.3143	44.7567	40.9493	42.0344	70.1929	65.3599	66.4782	0.00145508	0.0561006
FBgn0000117	arm	105.999	96.7235	93.127	54.0606	74.9814	76.6923	52.5202	64.5654	56.0745	1106.63	1095.68	1028.54	148.949	195.066	194.308	245.517	255.419	256.913	269.39	248.535	247.691	344.22	341.335	358.324	0.00145551	0.585298
FBgn0262515	VhaAC45	108.91	89.7555	84.2888	45.0821	30.1768	52.3985	28.4295	37.49	27.9319	666.915	602.239	609.141	81.7728	90.8947	91.9571	112.617	125.799	133.456	152.027	138.675	140.163	202.055	204.238	214.708	0.00146021	0.331684
FBgn0034403	CG18190	1035.47	1017.99	870.156	647.383	523.958	690.508	384.666	523.052	386.02	818.178	791.175	715.694	338.078	348.2	361.313	332.909	364.552	336.568	345.974	328.123	282.167	477.829	493.818	450.078	0.00146042	0.442513
FBgn0260462	CG12163	352.156	381.706	472.957	216.749	180.792	207.689	120.164	120.761	114.185	1690.79	1270.88	1183	154.916	166.225	168.748	148.214	148.606	140.153	143.121	131.353	133.211	151.478	131.811	141.362	0.00146052	0.294253
FBgn0004636	Rap1	131.275	156.869	125.913	73.6509	95.1592	62.9429	54.2479	59.4897	65.2379	1635.79	1730.02	1576.59	58.9745	74.6854	77.4669	91.6063	99.9622	102.048	117.065	96.1901	111.748	154.622	170.067	178.074	0.00146769	0.432249
FBgn0052190	NUCB1	111.395	112.518	86.6136	70.847	67.2176	74.1836	32.6408	38.037	25.7977	564.135	461.844	491.92	35.6484	40.5363	44.3093	39.2992	43.7323	47.1204	40.6858	40.5984	39.2243	62.6258	64.6213	71.5386	0.00146853	0.310684
FBgn0033691	CG8860	1236.47	973.955	952.844	599.654	516.652	387.298	282.67	361.778	328.17	1610.48	1935.44	1928.68	115.433	154.571	165.66	187.567	173.629	171.795	219.459	174.901	165.16	208.659	231.53	215.321	0.00148411	0.307472
FBgn0036052	CG10809	95.8705	84.2626	75.1804	36.3591	40.9894	25.7815	29.4354	34.6584	20.0223	105.135	93.6527	97.7971	28.1441	37.0163	33.6524	27.3389	29.997	26.5013	22.9804	24.9564	24.8194	51.3168	52.0421	55.66	0.001492	0.329462
FBgn0032725	Nedd8	899.763	975.108	733.799	448.528	233.341	242.384	203.689	178.066	0	1137.94	1689.92	1802.27	231.199	264.35	246.636	232.144	217.765	213.23	219.062	221.144	209.951	287.09	298.987	326.056	0.00149647	0.146341
FBgn0030853	ND-24	523.821	410.482	444.469	277.519	223.674	241.524	97.3482	182.432	129.013	1149.97	1039.16	927.669	119.322	114.388	109.371	97.2266	99.845	106.807	97.6778	100.969	101.376	95.6742	87.639	100.608	0.00149932	0.296491
FBgn0262601	SmB	320.176	284.574	346.287	220.101	202.338	145.108	144.11	119.103	166.197	685.642	650.029	683.097	288.482	250.663	262.8	237.611	233.976	254.512	244.074	230.501	239.7	224.358	250.042	244.373	0.00150244	0.451518
FBgn0039301	Nup37	228.293	180.251	243.845	55.5085	116.379	109.302	58.812	52.0297	73.5231	132.884	134.067	95.4435	84.0071	75.8822	85.3175	86.2795	76.9163	79.3182	75.5378	79.6014	76.2145	65.3897	80.4134	78.8592	0.00150301	0.282599
FBgn0034728	rad50	40.5418	48.9595	38.5528	17.5148	17.1022	24.7697	12.6769	15.5072	17.9376	8.80813	9.77567	8.53817	44.3034	50.2857	52.6884	29.8025	37.5965	32.2755	30.6664	26.7352	26.3176	92.6667	78.3001	69.5513	0.00150844	0.360174
FBgn0000140	asp	228.602	257.367	265.268	197.783	201.135	191.824	159.29	148.976	164.292	303.662	289.895	252.076	109.2	135.298	135.258	114.519	114.392	111.963	98.8474	87.1867	87.3182	230.354	181.483	175.229	0.00150909	0.62904
FBgn0003885	alphaTub84D	1113.63	925.379	1330.15	568.657	654.582	540.613	224.561	222.461	211.203	2787.69	2416.25	4153.88	231.116	199.525	202.431	186.564	168.448	160.523	168.598	148.777	161.163	186.792	167.628	186.023	0.00151386	0.195368
FBgn0029868	ND-B16.6	416.49	348.436	300.257	155.669	97.5598	101.694	98.1004	68.7574	91.4573	1588.14	1635.61	1447.26	79.538	90.0687	107.164	79.0487	88.6366	84.8587	94.9697	90.653	90.7145	102.108	117.005	124.589	0.00152033	0.242508
FBgn0033755	ClC-b	76.7148	90.0166	93.5724	57.0864	50.1015	49.9728	36.4298	27.0758	16.0444	89.5385	100.234	91.9781	30.0861	34.9839	36.2085	24.9144	28.381	26.0631	26.6231	22.477	22.6272	50.625	51.8104	51.2464	0.00152119	0.305605
FBgn0001224	Hsp23	1010.57	1238.48	1278.33	611.483	539.365	524.672	445.212	476.565	550.219	2665.52	2371.73	2932.55	143.538	184.966	158.622	127.322	128.282	140.665	140.924	127.757	116.085	196.818	162.218	181.207	0.00153365	0.417306
FBgn0286898	Tango1	68.5337	83.9888	90.6972	42.2782	44.2103	46.5657	32.0194	26.9246	24.6231	180.539	143.348	131.988	48.9917	55.9807	58.7386	55.7344	60.4141	56.1937	55.3996	48.588	45.8261	111.275	90.06	88.1256	0.0015348	0.343587
FBgn0032246	Wdfy2	48.4683	37.4592	59.2697	10.4199	10.7019	19.0786	0	0	0	55.8995	29.472	64.1965	102.771	109.314	112.034	118.546	125.007	118.541	130.321	118.004	119.295	126.531	133.081	123.357	0.00154047	0
FBgn0036299	Tsf2	77.9226	67.6928	66.5496	45.3494	36.5503	40.1023	27.3183	36.5749	22.7387	253.42	208.345	155.496	54.3726	54.9754	52.4038	58.8121	59.3136	61.8969	65.369	62.8993	61.5216	90.4417	74.3786	79.6766	0.00154057	0.408323
FBgn0028402	Sin	29.5478	32.0797	35.8625	21.8586	11.8856	30.0298	14.1223	17.5973	16.913	29.3953	26.5537	18.7867	23.0656	26.9545	27.2766	33.646	33.0155	31.421	31.7974	34.3393	32.5278	47.7491	47.9979	45.1001	0.0015453	0.498847
FBgn0030692	mRpS30	144.124	170.045	128.616	48.9862	62.2416	81.3803	53.6201	56.8632	51.8655	307.289	305.705	324.487	95.5308	103.737	103.315	95.1779	97.0122	91.2475	91.7381	93.1098	83.9047	152.386	139.17	151.177	0.0015464	0.366654
FBgn0026079	Nsun2	128.349	103.331	114.587	46.6195	61.4044	40.2744	52.1537	29.3248	39.1697	174.83	157.109	157.883	55.5155	48.7932	48.8532	30.9011	30.7983	28.9585	26.3496	22.8357	24.5237	52.7933	47.9395	45.5774	0.0015502	0.348425
FBgn0030034	CG10555	166.025	160.104	171.373	89.3787	104.598	102.662	66.1552	70.9938	100.712	459.108	434.511	417.275	30.3426	28.6115	28.8888	23.7853	26.1021	28.267	23.7301	22.5844	25.618	50.2971	46.7133	50.4768	0.00155281	0.478111
FBgn0037807	CG6293	92.8557	77.5262	76.8273	45.2254	45.0494	31.6393	35.9803	37.0002	24.9991	66.6483	59.2701	45.3116	74.6815	88.8116	88.4317	115.481	113.219	122.742	124.231	123.916	125.927	173.87	181.332	181.937	0.00155713	0.396343
FBgn0038576	Arp5	60.6028	48.8848	56.7119	16.581	22.4833	29.8834	25.3073	15.296	15.2605	70.18	60.8422	69.5618	23.3846	24.5279	23.3773	20.5664	22.9438	20.5682	25.6186	18.3947	17.7538	26.2234	25.2969	26.1276	0.00156055	0.336125
FBgn0052296	Mrtf	54.9114	54.2065	66.6518	28.8431	27.3336	25.0049	25.3491	17.815	14.6611	111.926	103.543	89.8914	17.4213	21.998	22.4686	15.8732	18.0928	19.5254	19.8645	15.22	16.3061	35.7369	33.9156	31.2576	0.00156112	0.328983
FBgn0030631	CG6227	42.8122	50.7292	54.7308	19.8168	25.0283	22.0858	18.1276	20.3	12.2354	274.418	258.583	271.331	29.6604	29.9331	31.9436	29.2289	33.0344	30.8375	33.8981	25.5908	27.3772	62.247	52.8856	49.8577	0.00156539	0.341689
FBgn0037109	MED1	62.8717	64.5932	63.2115	33.1357	41.4555	36.3517	37.5164	22.9795	32.0798	131.167	130.156	113.212	49.5508	53.6198	56.6906	49.3013	53.1732	50.2824	53.4566	49.1978	48.709	111.453	103.402	102.137	0.00156697	0.485513
FBgn0031590	CG3702	49.8612	50.6712	57.8899	35.3358	39.9427	42.3803	32.7348	27.1516	28.9995	187.286	173.666	116.431	64.906	75.3132	76.2564	84.1115	73.5474	91.4741	101.09	94.5677	88.4707	152.838	155.042	141.753	0.00157821	0.56107
FBgn0052626	AMPdeam	467.267	386.867	441.279	265.891	239.832	226.946	211.466	128.367	131.814	130.137	124.318	197.412	157.311	165.505	159.221	118.617	118.399	109.806	103.924	97.4953	96.5017	164.663	158.893	155.963	0.00159087	0.36409
FBgn0036184	PCID2	128.933	106.296	132.72	80.6576	71.6193	47.0796	24.9048	50.4561	26.8873	156.265	147.362	164.527	71.0443	73.4813	73.9792	66.1901	63.8056	68.2218	60.7904	62.0828	66.2288	88.4375	75.3741	78.2368	0.00159935	0.277888
FBgn0036990	mRpL15	108.964	84.1492	119.343	32.8721	24.5375	39.3402	12.1018	26.4134	17.1083	133.18	140.139	121.978	69.9994	69.6561	73.698	61.7633	74.0646	73.6553	73.3503	61.4242	71.0047	91.3013	98.1483	97.2858	0.00160106	0.17802
FBgn0030451	CG15717	76.2539	80.281	83.168	43.5985	38.647	43.5134	26.6517	34.2956	45.5472	158.064	170.68	103.597	104.777	99.9442	101.939	104.227	109.84	107.699	109.056	117.82	117.427	121.551	106.911	110.642	0.00160831	0.444277
FBgn0035644	DNApol-epsilon58	90.8736	90.1147	72.3599	67.1481	43.5013	52.5191	38.2214	34.2366	28.33	180.729	184.02	157.491	51.0462	50.6311	51.3088	46.3304	49.7658	51.9795	46.0699	39.8904	41.6518	51.9992	53.4555	50.9839	0.00161305	0.397824
FBgn0036335	mRpL20	259.319	258.052	348.485	51.6798	71.2272	65.632	0	57.3222	0	309.767	337.679	404.971	56.0827	63.2615	62.9979	66.3952	63.8704	67.3373	64.4134	66.1967	64.8027	90.6402	94.5605	85.8324	0.00161716	0.066203
FBgn0038360	CG9590	71.0786	70.9026	86.1181	37.8023	47.2252	51.1773	33.4109	29.7189	20.4288	97.5582	94.7238	98.6216	33.0356	35.881	37.1256	35.2582	33.3465	35.4449	28.6464	33.8868	28.0742	56.8422	54.0473	54.115	0.00162006	0.366326
FBgn0051549	CG31549	225.802	248.223	240.323	133.988	137.349	120.135	83.5299	136.461	91.8577	1182.52	1107.29	1052.28	110.4	115.217	108.179	110.601	106.396	107.968	125.653	112.874	104.487	127.319	117.137	129.62	0.00162287	0.43655
FBgn0031143	CG1532	117.375	119.456	98.3616	67.9523	54.8404	57.1463	38.9174	56.861	46.1653	113.251	126.957	130.291	77.9398	90.0066	91.2269	93.486	97.5492	102.552	109.481	97.8181	90.033	132.233	138.547	133.501	0.00162381	0.42347
FBgn0039632	Cul5	59.6922	52.3029	58.2974	40.6061	34.3027	37.4659	32.5834	21.5276	23.7768	49.0161	46.2878	40.0177	35.341	39.6895	40.2395	34.1887	41.9168	39.2443	40.0734	38.8232	39.5655	75.5432	79.3113	78.9188	0.00162551	0.457376
FBgn0019960	Mitofilin	43.6621	50.3134	50.3142	27.5217	35.1161	37.5003	18.9449	24.1285	27.1399	347.342	276.218	248.522	78.6205	80.3836	80.1529	96.5054	99.3555	99.9177	100.851	97.5101	92.5228	95.8217	86.5988	94.5513	0.00163375	0.486614
FBgn0027889	ball	199.325	161.82	195.137	108.029	106.777	83.2079	79.6844	66.3459	41.8352	355.932	310.983	259.248	195.216	186.188	185.104	187.988	182.764	176.524	171.307	167.698	173.127	173.312	183.272	176.102	0.00163795	0.337716
FBgn0025808	Rad17	147.21	115.797	152.646	55.1378	46.6299	43.5005	54.6117	48.1612	46.2202	41.6737	43.2026	47.4421	51.7029	55.0387	51.3384	40.1581	46.1567	50.1773	49.1642	45.3761	38.0603	62.5747	60.6851	57.4627	0.00164283	0.358456
FBgn0030674	HUWE1	97.5193	122.876	121.077	56.0742	84.2802	52.9163	48.7475	40.2355	51.7921	196.018	177.142	147.325	59.3786	58.7822	54.8519	31.4928	32.6623	36.1225	25.308	23.8752	24.299	95.9152	69.4983	60.7874	0.00165598	0.412259
FBgn0051460	CG31460	113.942	117.954	146.24	58.2973	62.9275	71.8567	44.3452	18.2531	23.4319	446.922	430.394	462.347	57.4254	47.7413	51.3359	46.738	53.8505	54.3045	53.0458	52.5916	57.6457	58.4367	47.6385	48.2609	0.00166001	0.227512
FBgn0036450	Tdrd3	158.919	191.785	151.894	92.2365	98.3149	98.323	68.1007	58.8539	76.1005	53.9332	53.5744	45.7567	58.3145	61.7502	62.4956	48.1921	55.114	54.2785	46.9832	44.8495	45.824	74.7244	85.6286	75.5609	0.00166841	0.404011
FBgn0260985	RfC4	396.027	359.672	463.243	241.881	193.934	211.141	161.236	176.124	128.931	661.223	724.966	497.123	215.048	211.912	216.691	233.2	222.719	229.156	215.985	206.116	212.862	193.307	188.427	205.677	0.00167779	0.382538
FBgn0035194	Psf1	113.426	86.9433	95.0549	58.0895	39.9827	56.0982	36.8947	19.3081	28.8351	230.763	239.039	264.147	52.2027	68.9115	69.6997	93.8568	76.4355	85.5201	95.105	73.1139	76.7224	81.2267	97.3125	92.9832	0.00168256	0.28785
FBgn0011762	DNApol-alpha50	117.315	130.951	123.369	64.6699	62.8102	82.5616	57.7371	55.7857	28.6065	348.319	375.514	364.482	45.0045	40.9991	47.8957	49.9345	44.5325	43.2876	48.8906	44.4008	42.1443	69.0393	58.9264	58.7536	0.00168805	0.382442
FBgn0266465	GckIII	201.166	172.922	233.366	111.631	118.728	109.041	70.2133	54.6268	71.3887	74.351	62.9525	73.8772	48.415	48.6614	48.836	35.0214	35.0968	36.6079	31.2439	28.1319	27.9655	49.776	53.601	49.8402	0.00169124	0.323035
FBgn0036764	CG5535	338.652	313.702	377.809	217.573	226.712	232.989	126.263	137.69	184.896	236.286	230.364	202.788	112.043	114.158	107.843	97.6198	93.194	91.0161	87.2638	82.9264	81.0387	107.831	93.3349	103.69	0.00170341	0.435707
FBgn0027329	CCT6	1100.67	896.356	1179.01	652.896	568.144	614.083	394.393	349.276	444.117	1957.72	1477	1205.3	518.544	529.351	523.218	515.809	527.99	534.215	516.055	485.311	483.163	466.698	496.254	495.835	0.00170728	0.373984
FBgn0028670	Vha100-2	119.763	84.9124	106.592	60.3712	56.7508	44.2681	30.2853	23.4685	24.7779	27.6588	29.5583	34.0371	62.8155	88.1932	88.0874	108.558	123.03	120.219	132.77	120.126	123.164	273.885	261.728	254.253	0.00170859	0.252296
FBgn0033258	CG8712	82.5295	107.014	87.4341	57.3441	34.2667	49.5015	32.5826	17.468	12.94	44.0337	36.8246	35.4565	32.6528	41.5443	44.8836	39.6151	48.0274	44.2241	43.0278	40.4038	45.2132	71.257	86.0512	71.7829	0.00171766	0.227421
FBgn0011202	dia	42.5547	55.3907	47.5696	20.4447	18.6003	29.5236	19.2791	21.5298	19.5013	321.01	291.404	269.406	16.6844	21.5072	23.3642	23.1345	25.4358	26.8443	27.5771	25.9826	22.7393	60.2491	49.9491	50.4596	0.00171799	0.414461
FBgn0037360	CG2182	340.041	260.637	335.71	160.171	167.611	189.248	123.151	110.355	119.518	210.061	216.308	161.776	144.834	157.627	164.365	157.05	175.745	164.545	183.958	158.225	154.452	281.62	273.417	257.08	0.00172285	0.377006
FBgn0033339	Sec31	221.085	196.861	223.239	118.851	120.337	130.533	120.857	75.8875	97.8902	122.818	105.734	99.7072	95.4619	92.0195	91.7436	76.6709	72.1139	75.3747	70.8979	65.3489	66.6779	93.3914	81.2365	80.5937	0.00172927	0.459517
FBgn0035270	CG13933	0	0	0	3.95801	5.2945	4.30428	2.87075	1.8231	2.18081	5.89194	9.77583	5.30498	11.4341	15.7342	17.6337	25.1982	28.2377	27.019	28.2848	25.6131	24.999	64.2342	66.1876	62.7218	0.00173131	#DIV/0!
FBgn0050359	Mal-A5	796.907	650.787	949.91	274.306	178.378	300.58	128.598	154.241	167.723	754.74	462.862	557.044	288.463	300.342	295.719	159.101	164.545	165.732	159.887	159.071	148.028	131.675	119.89	133.169	0.00173415	0.187922
FBgn0027280	l(1)G0193	34.5998	45.041	37.3187	19.1076	16.8711	24.0823	7.50853	14.678	8.05762	361.057	301.014	311.849	42.2038	57.0836	53.1145	61.2722	65.2262	62.2928	57.2423	55.994	57.6533	86.4324	77.9455	81.0582	0.00174155	0.258586
FBgn0036053	iPLA2-VIA	117.535	118.99	146.204	76.7098	64.2805	50.6082	51.4351	46.9268	29.8543	30.9384	28.8005	18.1121	80.4176	95.0723	92.4842	78.4918	80.6541	82.2921	75.3782	69.6369	67.3338	130.409	117.258	108.304	0.00174533	0.335005
FBgn0086134	Prosalpha2	722.749	621.996	600.036	282.404	339.836	349.037	170.512	266.038	88.9169	3329.25	3371.38	3452.58	477.25	480.092	473.708	548.79	539.454	546.519	585.451	558.788	534.317	528.802	490.225	537.546	0.00174576	0.270194
FBgn0038745	CG4538	112.287	111.46	144.354	57.3916	52.798	48.4064	44.6324	31.4814	35.2393	409.135	344.969	313.774	49.4418	51.7689	52.2091	54.6547	56.3508	55.8027	54.3748	52.0158	49.8931	73.9951	68.7253	71.2297	0.00174924	0.302507
FBgn0033454	CG1671	53.7405	51.953	57.2666	32.309	26.5732	27.0936	25.8898	25.7582	13.5094	67.9177	58.5247	56.1794	46.4868	39.2965	39.8608	34.7906	39.3395	36.5349	44.5805	34.9531	35.6829	55.9219	50.3607	49.6136	0.001758	0.399837
FBgn0027512	CG10254	175.444	232.179	223.782	139.872	121.354	119.45	83.9876	69.3112	71.6449	167.771	154.706	122.321	152.683	196.543	198.931	170.858	177.907	170.181	160.759	139.661	139.615	515.021	444.068	418.546	0.00175938	0.356259
FBgn0031893	MICU1	108.13	127.325	89.317	33.1413	35.6011	64.421	19.4639	18.444	29.7651	297.06	313	364.416	45.8918	54.3643	53.1244	43.6061	52.6539	47.9435	52.9666	48.5595	41.1463	84.2628	81.958	80.9244	0.00176233	0.208371
FBgn0061515	endos	824.447	842.189	755.723	405.624	319.348	350.784	0	278.222	0	2052.12	2280.57	1475.37	315.022	353.512	370.914	419.348	481.314	477.994	489.057	487.751	463.644	416.599	591.245	572.734	0.0017672	0.114856
FBgn0034380	Vps51	29.4094	25.0187	31.7735	25.7504	12.6997	15.0249	9.88335	10.026	3.9858	56.0506	60.1464	55.5855	23.2149	29.0834	29.0138	27.2003	26.2851	24.5264	23.7411	25.5514	22.6664	46.53	40.0103	40.4764	0.00177858	0.2772
FBgn0039867	CstF50	57.359	56.9219	68.903	24.6262	33.4473	31.2771	29.1434	18.77	18.4879	150.829	160.45	169.276	41.5997	41.4208	41.8475	40.474	44.455	43.8968	47.6985	41.012	42.8804	47.4198	50.1126	49.0277	0.00177958	0.362484
FBgn0037710	CG9393	17.9523	20.1173	16.7227	12.2599	17.1794	17.1029	0	5.90293	0	181.141	218.869	203.158	15.7904	29.8015	36.0416	32.0173	42.7608	35.0611	44.8176	39.8854	35.2345	76.691	83.5865	87.6796	0.00178322	0.107733
FBgn0039743	CG7946	202.339	237.41	221.024	121.731	108.503	128.243	77.5933	70.798	117.715	702.043	613.912	648.4	70.8191	71.9888	73.5864	62.9371	73.3432	67.2688	73.6339	67.0742	62.0564	82.4243	76.1542	78.5639	0.00178819	0.40272
FBgn0030268	Klp10A	169.116	195.89	193.505	105.832	102.034	97.4439	107.352	84.6091	108.97	1372.09	1207.38	1064.93	81.4118	110.295	115.137	127.835	143.243	143.089	148.315	139.207	136.064	210.36	182.548	183.917	0.00178908	0.538808
FBgn0032250	holn1	42.4246	47.1235	40.4309	17.1891	25.9637	32.7079	16.0487	22.1484	23.7603	295.006	269.882	359.251	26.2056	36.634	35.1011	41.2702	42.3225	40.0746	44.9136	38.8836	39.2078	83.1736	73.5089	69.083	0.0018012	0.476672
FBgn0027070	Ugt36E1	107.92	84.0835	95.726	42.385	58.0531	56.424	43.2162	43.8965	46.7901	211.168	199.959	192.086	45.9247	54.5185	56.115	59.4022	64.089	66.6359	62.9689	62.7767	62.1047	75.8061	70.6033	75.3749	0.00181699	0.465377
FBgn0031609	CG15443	41.1245	35.1864	37.8595	15.6268	14.3475	22.1145	10.1859	12.248	0	121.348	123.725	123.562	46.6341	49.426	44.2216	42.9351	46.1332	43.4301	40.8438	37.8164	42.6932	72.072	73.9927	70.5666	0.00181962	0.196495
FBgn0020392	Nmt	612.739	656.807	781.855	360.473	313.816	337.513	283.068	264.962	178.434	1086.32	1053.65	878.009	251.756	268.766	269.158	249.792	237.864	241.341	234.904	219.449	215.757	289.637	259.024	269.022	0.00182232	0.354131
FBgn0037339	Pi4KIIalpha	44.8551	56.1239	54.2816	40.0798	44.195	33.2195	16.7427	24.1772	22.6228	156.084	145.967	152.692	26.5695	28.9906	32.8354	31.3974	38.7832	37.3467	39.1758	33.363	31.772	46.7479	60.299	57.4016	0.0018256	0.409265
FBgn0037834	Art1	313.252	353.487	252.769	117.475	102.192	172.623	93.9377	59.3332	43.9956	924.177	1014.72	929.598	260.14	286.38	308.46	303.271	298.771	295.887	292.742	285.577	275.925	354.187	355.009	374.951	0.00183131	0.214535
FBgn0067861	Sdic1	149.7	109.203	168.593	85.7174	94.0832	96.6506	11.9347	13.2873	15.6645	87.6939	68.3375	289.621	33.133	34.9596	38.1813	34.4226	15.9981	36.4148	33.6881	31.4207	29.6758	33.5667	39.2932	38.9427	0.00183231	0.0956419
FBgn0031603	CG15432	109.939	115.214	80.8936	25.5878	38.3381	44.7742	4.88858	22.4841	0	162.195	214.43	197.04	17.2665	20.704	21.1924	19.9956	17.7947	17.8601	12.8353	13.3591	17.9615	35.3538	33.3128	35.4387	0.00184081	0.0894393
FBgn0041191	Rheb	69.6297	64.4885	98.5378	0	0	64.4895	0	0	0	160.538	206.48	239.664	64.7141	77.1751	76.8613	86.4177	98.8036	99.6029	97.9033	96.8876	96.8112	117.166	123.733	136.07	0.00185501	0
FBgn0000253	Cam	2692.73	3205.43	3845.84	1440.31	1641.41	2043.09	604.014	890.965	700.201	12787.3	12143.7	15154.6	908.157	937.366	937.029	1135.7	1224.3	1179.83	1264.32	1205.43	1171.48	1133.93	1104.78	1156.87	0.00185917	0.225285
FBgn0021944	Coprox	46.1391	43.7173	50.9995	22.941	40.3185	26.3197	25.9901	16.0906	18.7898	34.7769	39.9751	35.6811	19.4999	29.6223	33.9192	40.6262	38.5387	38.1182	47.2075	40.0544	40.8528	51.2098	71.7989	61.0213	0.00186561	0.432147
FBgn0004915	TfIIB	172.985	208.773	168.962	108.868	87.9333	100.431	73.6866	89.9755	64.129	463.83	543.991	670.534	92.8244	91.7089	87.2356	110.145	99.7359	102.1	112.148	99.8285	99.2215	126.233	132.548	136.025	0.00186586	0.413625
FBgn0021768	nudC	340.572	435.976	488.454	166.771	134.118	164.122	67.2044	87.2107	0	736.651	745.115	819.503	92.5035	112.874	117.819	100.939	110.476	107.278	118.517	96.5691	95.9502	118.517	116.475	117.007	0.00186911	0.122067
FBgn0035312	CG15820	39.3296	32.158	43.3795	28.4585	14.0914	16.0555	4.41469	10.8578	0	11.0367	8.30834	14.4641	10.1481	17.9815	19.0683	19.1478	19.3602	18.2961	23.1403	15.4012	18.733	38.1591	39.6664	40.8689	0.00187601	0.132958
FBgn0030456	CG4332	58.7677	56.888	59.312	59.493	43.0974	42.24	25.64	37.8707	32.4141	295.772	271.145	280.246	65.1141	75.1619	76.1005	86.4793	85.6308	85.1746	92.8616	79.1817	84.9134	116.338	103.687	119.214	0.00187952	0.548243
FBgn0030329	prtp	140.645	104.804	111.319	68.4104	81.6319	74.6897	33.0076	41.5886	33.3621	1081.47	867.633	764.02	57.365	65.6936	68.5207	79.7698	85.7105	84.4632	84.4479	85.8873	89.2779	124.882	126.864	137.681	0.00188011	0.302601
FBgn0030460	Coq5	32.1954	30.0367	24.9856	11.7756	10.7852	25.3258	5.30447	7.94346	11.774	54.4362	62.0059	60.0526	40.373	39.77	36.2873	41.8704	38.6919	43.5314	46.4912	43.516	40.3973	45.9171	55.1614	48.0066	0.00188375	0.286891
FBgn0010100	mAcon1	793.613	808.005	941.252	661.737	621.823	641.421	425.874	411.591	284.458	2445.6	2107.88	1842.65	268.226	270.157	273.175	290.522	279.945	285.654	259.866	259.438	254.931	237.337	212.184	229.573	0.00188856	0.441204
FBgn0039025	Usp12-46	53.1346	41.1665	43.6288	31.4616	21.0708	34.2481	8.16302	17.6105	9.24819	231.463	233.654	221.181	23.2185	23.6744	24.1187	25.4555	28.1106	24.4946	29.0782	25.8707	26.8922	38.3022	40.1781	40.6965	0.00189523	0.25391
FBgn0024846	p38b	253.503	248.365	333.522	123.751	105.099	127.638	69.5102	64.2006	85.0678	355.42	297.057	201.255	60.7948	68.5025	66.6566	57.6885	62.6877	53.1029	63.3185	54.7646	54.9348	85.7822	88.1733	93.0789	0.00190146	0.261888
FBgn0033476	oys	139.241	154.406	113.054	69.6663	64.7666	67.8669	44.471	47.6334	32.3172	146.837	131.082	118.224	54.3237	80.9634	89.3282	87.3063	96.7707	96.7739	106.539	89.0089	92.12	197.583	187.75	181.377	0.00190489	0.305929
FBgn0038390	Rbf2	79.7466	91.7959	71.2102	53.9859	53.9209	53.2863	37.5728	36.4304	38.1364	56.5696	69.7087	64.9426	48.245	54.6373	54.9445	52.4158	58.6766	56.4655	58.5018	52.2163	52.1107	129.98	125.574	117.719	0.0019061	0.46195
FBgn0034939	thoc5	117.183	104.534	90.0238	65.9175	63.7256	71.3301	31.6943	46.851	35.7441	262.821	264.375	300.42	40.3619	37.9383	40.7708	42.8537	42.5425	40.5083	41.1786	38.5284	37.2549	57.494	53.7128	49.1017	0.00190738	0.366617
FBgn0030457	CG12096	154.053	116.02	128.132	65.0594	60.1106	70.0816	42.0073	53.8083	46.8809	251.401	256.936	229.817	44.9695	46.3241	44.2228	41.4658	38.4632	35.0375	33.6615	34.7513	37.3031	53.1571	52.4511	52.6682	0.00191001	0.358349
FBgn0010590	Prosbeta1	1763.46	1614.05	2108.11	901.939	860.456	856.967	645.758	612.305	800.813	4087.68	3977.26	3752.86	492.357	478.772	471.87	463.897	420.044	434.342	471.191	460.684	471.93	365.509	318.888	364.28	0.00191421	0.375322
FBgn0028688	Rpn7	754.257	641.003	810.972	498.315	399.498	394.486	381.612	313.287	343.053	2227.95	1986.2	1521.22	272.087	269.193	264.002	252.054	241.794	247.352	248.304	239.954	229.57	255.676	236.977	243.689	0.00192424	0.470464
FBgn0261458	capt	924.659	792.549	932.333	649.932	606.87	637.667	329.586	460.96	265.32	2206.08	1825.61	1750.28	148.28	132.535	132.159	132.54	123.139	131.038	123.89	122.961	121.621	119.536	109.581	119.393	0.00192435	0.398509
FBgn0040475	SH3PX1	34.8352	39.4552	34.7606	17.9086	24.4233	31.3546	16.9556	9.57434	6.33323	75.2575	70.2103	46.6472	27.2168	37.8808	40.1403	40.7948	47.3698	46.4568	50.5284	45.5437	45.2181	84.6498	98.8076	90.1145	0.00192713	0.301355
FBgn0034631	TAF1C-like	20.9897	19.1593	22.2152	11.9571	10.2987	10.1582	11.1328	11.6322	13.7268	126.849	147.478	136.43	17.4941	18.4206	18.0566	20.9277	20.605	18.5617	19.3536	15.7421	16.5229	38.4383	32.8806	33.662	0.00193362	0.58514
FBgn0264291	Det	328.671	297.311	238.841	151.869	78.1722	154.787	65.8453	62.4146	0	233.417	181.125	356.165	136.767	129.699	128.459	138.526	136.666	134.516	185.51	168.998	154.668	126.896	108.986	109.003	0.00193399	0.148308
FBgn0030208	PPP4R2r	268.801	343.26	363.281	138.141	179.255	201.646	121.249	116.594	108.127	829.357	723.498	715.309	89.5618	100.786	105.624	81.1179	91.598	80.3043	70.8744	67.7016	64.5821	103.541	95.276	100.335	0.00193706	0.354717
FBgn0015799	Rbf	32.9962	35.6355	28.0372	21.248	17.3452	17.5479	13.6046	7.81187	12.8527	175.052	160.552	129.27	46.5001	64.5584	66.7446	80.3536	89.1133	93.2384	110.682	98.4209	94.9898	206.374	204.938	194.108	0.00193775	0.3545
FBgn0037377	CG1218	261.857	219.361	300.76	165.844	124.433	117.293	82.4076	90.138	94.1053	567.535	527.447	527.658	81.2863	83.1634	81.9513	78.6968	81.662	75.9988	76.8475	68.7589	63.4821	114.385	101.477	102.701	0.00194039	0.340995
FBgn0033194	Vps13	57.0109	70.6031	51.7286	39.5322	32.6824	38.3779	15.1459	17.6234	7.29442	22.7012	30.3938	22.355	36.6085	37.6215	34.4416	20.2308	20.4856	16.98	12.0051	11.7797	10.9564	34.6854	27.3718	25.0616	0.00194729	0.223392
FBgn0037027	HIPP1	28.6564	28.205	31.5942	9.56384	11.7836	10.9676	5.27283	10.9459	0	23.5374	26.7177	28.7405	64.0137	76.1215	82.182	94.5186	110.296	109.535	112.026	101.249	102.438	239.366	229.246	221.774	0.0019501	0.183354
FBgn0035771	Sec63	87.625	98.2656	101.669	52.5561	58.7651	47.0185	30.0684	35.7087	52.0748	686.769	574.722	536.306	59.3908	76.9001	77.7311	88.2942	96.606	91.6238	94.2907	87.35	88.1641	131.151	111.908	113.523	0.00195494	0.409835
FBgn0027568	Cand1	123.013	109.866	112.224	75.9144	81.3186	80.0517	66.04	59.4551	42.1103	325.881	308.447	247.822	83.4825	86.4263	85.8818	74.2402	80.5543	74.4101	69.1798	66.7479	63.5045	94.5111	84.2303	83.3169	0.00196043	0.485667
FBgn0046214	vig2	813.984	755.398	835.974	528.636	560.589	560.863	124.053	281.856	368.507	1220.05	1044.47	1068.96	679.545	759.043	771.83	793.215	833.291	817.61	832.646	767.203	772.567	839.845	977.118	858.753	0.00197048	0.321955
FBgn0034248	CG14483	356.688	317.275	260.532	73.1502	60.9318	81.2756	45.7262	103.556	81.4193	190.554	305.429	295.566	47.0436	48.7885	49.9157	49.4092	38.7458	45.7094	43.3843	48.0626	48.381	42.5712	56.2736	59.7155	0.00197557	0.246872
FBgn0266521	stai	2059.6	2761.87	2103.49	1317.95	1282.82	1280.16	720.056	647.965	599.869	2127.25	1805.83	1597.96	478.976	509.373	501.584	411.511	396.611	378.755	336.639	328.001	294.162	634.234	570.413	544.465	0.00198204	0.284173
FBgn0033757	muskelin	414.865	444.171	384.641	347.339	325.699	368.065	271.476	271.294	231.258	740.005	805.715	615.752	204.064	238.84	239.659	193.556	187.431	190.11	174.254	159.123	156.313	303.917	276.642	275.218	0.00198384	0.62237
FBgn0035981	CG4452	45.1038	52.8873	55.8928	36.0169	42.5055	45.6324	13.6554	21.8481	8.11977	532.993	412.877	515.557	49.5655	64.4528	63.2598	89.602	85.9892	90.5101	102.139	80.5175	78.7354	145.291	143.089	136.606	0.00199758	0.283481
FBgn0264077	Cnx14D	3.56457	4.3502	3.47045	8.72331	4.31351	2.95561	0.24988	1.20582	0	8.16291	6.25234	11.6145	0	0	0	0.074956	0.043011	0	0	0	0	0.053032	0	0.02795	0.00199798	0.127859
FBgn0038318	CG6236	73.2304	82.0658	96.1756	56.7429	39.4406	42.9995	29.2668	17.9663	32.3799	178.118	127.536	100.2	64.5326	74.5225	72.1954	70.5696	69.34	69.4006	66.5944	60.7111	62.2166	94.6578	89.5497	92.9184	0.00200248	0.316588
FBgn0023395	Chd3	142.789	188.781	163.096	113.038	104.64	112.24	73.1517	63.5032	60.9288	195.521	201.47	173.764	78.8298	85.2553	89.2623	78.3547	83.3838	77.9785	81.2908	73.1924	67.5042	139.77	129.654	122.202	0.00200647	0.399428
FBgn0031459	CG2862	424.832	312.111	320.958	68.1396	156.026	151.887	49.1315	57.9284	100.832	1131.29	1221.19	1199.55	289.308	259.945	274.626	268.925	273.999	302.391	298.158	292.955	308.409	336.038	348.303	357.379	0.00201089	0.196513
FBgn0026179	siz	16.0341	19.1692	18.0571	15.2807	16.2578	13.6612	10.8685	10.1828	11.3028	23.0604	30.9733	32.9576	13.7459	18.7612	17.8241	21.9726	25.3605	26.0196	31.0532	27.4309	25.9173	78.0008	69.8575	69.0946	0.00201822	0.607468
FBgn0038739	CG4686	40.0409	36.6055	48.6279	0	28.3779	33.2092	6.65864	0	11.9374	124.805	165.401	170.742	36.5799	58.0567	60.5458	71.6383	78.3806	74.9259	103.444	85.5999	82.8503	115.823	133.555	137.081	0.00202079	0.148443
FBgn0030611	CG15027	26.7464	24.0644	25.2525	0	11.6005	4.20592	9.09916	6.5313	0	101.599	81.9983	86.1675	10.6568	16.4295	18.498	18.5958	19.2205	16.2034	22.1584	15.056	16.5373	26.2212	22.9078	22.5089	0.0020246	0.205493
FBgn0052243	CG32243	33.8141	40.4127	27.0086	16.0738	8.46161	14.5634	5.86199	6.64959	5.32714	2.04967	7.7871	8.43826	44.7072	63.8877	62.6464	58.3789	68.1861	61.1492	77.6584	68.0832	57.4139	145.322	135.294	122.235	0.00202573	0.17621
FBgn0035235	CG7879	4.98226	3.42836	4.58669	4.05235	2.61175	3.37691	0	0.943541	0	5.51554	14.391	10.6289	3.64473	5.13851	5.29918	5.62064	6.02935	5.8799	6.2123	5.3778	5.27792	19.8925	20.506	21.1304	0.00203066	0.0725951
FBgn0261862	whd	69.8923	59.153	64.1279	34.6042	38.2938	33.0784	14.0288	30.9613	23.7707	574.374	541.074	510.53	26.0314	30.8205	34.379	39.5458	42.642	45.346	48.5882	38.2847	38.0703	98.5924	95.295	90.8166	0.00203129	0.355954
FBgn0037930	CG14715	401.083	367.273	435.581	108.299	96.413	118.853	91.4396	139.529	0	1651.22	1506.11	1589.74	127.781	115.525	113.9	99.9062	108.574	103.904	99.652	111.659	111.536	154.477	141.265	151.106	0.00203536	0.191844
FBgn0014340	mof	100.117	99.1986	104.746	54.5815	69.4308	57.2148	38.9369	41.2734	62.0821	316.586	295.404	296.365	49.9832	60.512	61.4451	53.5786	53.2612	53.8143	46.6749	40.4705	43.6897	56.9388	55.354	53.9115	0.00203724	0.467972
FBgn0000259	CkIIbeta	365.041	387.825	333.744	228.574	173.746	183.711	56.7648	134.126	0	438.777	485.617	467.067	198.451	232.62	238.782	266.145	313.89	293.182	354.052	320.431	332.699	342.779	376.733	356.272	0.00205275	0.175676
FBgn0034315	CG5721	102.731	126.42	141.155	55.6488	59.4603	62.1226	39.1749	46.8733	37.327	155.884	152.325	119.025	61.8651	70.8094	71.9397	68.0352	75.942	76.9547	69.1049	70.2951	66.9013	91.6388	97.7111	88.1059	0.00206135	0.333171
FBgn0040273	Spt5	91.0104	93.3947	78.595	54.3035	61.5532	59.0013	39.0022	45.9749	27.5835	427.665	432.478	422.851	46.79	55.0518	53.8777	50.1739	52.8693	53.97	51.28	44.9374	44.658	80.2846	75.5931	73.4972	0.00207067	0.427987
FBgn0031544	CG17593	75.4104	95.1767	96.8527	33.795	22.3848	34.6237	28.2411	16.8325	35.4734	163.653	129.279	124.852	64.7222	86.8699	91.9905	99.6359	101.669	101.574	98.8283	90.0765	90.3425	167.37	165.669	163.472	0.00207133	0.301178
FBgn0034313	CG5726	71.0413	84.7489	75.2361	67.6552	53.1643	52.8616	47.0535	37.169	39.2067	176.356	183.724	202.249	38.8536	54.5603	56.9134	58.7484	70.6485	68.9628	72.9499	66.0722	66.4606	131.473	133.956	131.309	0.00207937	0.534265
FBgn0035955	CG5194	267.932	265.525	208.664	150.909	120.823	103.871	61.0212	106.002	76.1261	357.284	411.918	411.281	77.0039	98.413	90.4021	91.5728	90.9206	83.0268	92.4622	90.1301	88.1448	101.714	100.386	98.6388	0.00208553	0.327641
FBgn0042138	CG18815	271.202	200.631	288.108	110.253	101.402	106.278	56.522	64.7804	65.6364	358.419	319.324	356.861	96.6958	105.078	108.508	117.551	110.159	106.855	106.6	124.478	116.062	119.518	117.614	116.469	0.00209176	0.245991
FBgn0030943	Nup35	340.412	296.278	392.375	195.221	180.742	200.252	151.869	118.6	110.73	660.257	564.297	555.338	88.5928	89.3096	89.7651	94.763	91.2436	90.6334	96.6098	79.9588	91.373	107.38	112.344	115.154	0.00209988	0.370432
FBgn0031252	CG13690	172.667	129.321	138.178	91.0873	66.9509	68.9919	55.0967	41.5487	34.2306	404.613	401.707	361.259	73.1995	84.8088	84.5583	84.7615	85.3351	87.1838	86.7051	78.345	81.4274	111.583	114.545	116.22	0.00210322	0.297334
FBgn0032217	CG4972	269.909	333.036	226.941	122.42	97.6568	133.5	60.5533	56.6379	58.3428	398.79	403.914	358.226	87.9707	106.82	112.737	110.224	121.06	115.593	120.668	109.195	102.766	232.234	209.018	189.808	0.00210682	0.211516
FBgn0031436	ND-B17.2	351.215	291.31	322.541	94.3595	0	119.457	92.8536	99.312	0	577.872	888.455	797.965	91.021	105.24	105.764	98.5462	93.9592	108.558	111.323	99.0912	101.837	98.1013	120.938	115.327	0.00211353	0.199122
FBgn0029915	CG14434	315.489	224.292	287.904	114.619	81.7782	124.158	87.3655	83.5549	84.1386	524.47	501.008	467.32	95.0458	114.004	114.706	92.3729	102.311	94.9789	111.754	108.636	113.3	132.836	133.496	136.732	0.00212085	0.308159
FBgn0037526	ArgRS-m	25.8836	21.4906	17.7857	12.5462	8.73554	13.8299	4.82097	2.68795	0	14.4079	11.279	9.29759	19.6199	23.8521	22.758	22.0615	22.5375	22.1344	23.3528	24.7474	22.0534	35.6786	36.0262	32.3296	0.00213066	0.115238
FBgn0030320	CG2247	45.3951	60.4207	53.5192	22.2295	22.8442	29.545	22.5186	22.5873	22.3407	506.011	560.55	470.271	47.8814	66.5536	65.096	80.7413	89.7427	86.9065	91.345	81.7616	76.4532	133.033	115.744	112.714	0.00213135	0.423301
FBgn0027835	Dp1	243.437	278.31	265.233	262.452	235.317	220.739	171.973	161.458	134.603	574.402	592.328	577.701	117.204	128.899	128.598	123.28	133.384	130.544	117.463	115.654	106.351	206.642	183.747	180.018	0.00213156	0.594721
FBgn0035640	mad2	579.592	398.7	474.707	168.888	121.566	147.733	90.718	129.053	79.3624	856.508	982.871	870.178	139.023	162.362	152.047	136.618	157.552	150.971	174.782	148.752	157.516	229.624	257.892	241.016	0.00213383	0.205873
FBgn0019925	Surf4	184.965	165.227	150.954	178.626	117.241	147.068	76.7962	96.3817	75.537	1955.08	1955.24	1830.06	124.846	136.561	142.89	157.153	159.885	157.504	152.202	152.191	160.561	195.648	162.195	176.123	0.00214312	0.496292
FBgn0003687	Tbp	102.628	97.0165	77.8451	35.7298	34.6971	49.6581	39.9782	39.9044	34.426	800.932	752.553	727.532	39.4963	47.9918	50.8987	55.7525	60.5126	59.419	64.1167	56.9833	63.7298	97.3471	91.7349	97.359	0.00214402	0.411938
FBgn0025615	Torsin	101.249	100.352	78.9175	68.1033	48.178	38.6339	19.7726	31.7739	37.9951	334.32	351.347	317.706	100.195	107.772	101.714	109.986	115.896	115.122	113.859	115.57	109.748	125.014	128.123	124.682	0.00215115	0.3192
FBgn0034066	CG8397	477.822	366.929	362.512	159.386	113.075	172.419	100.153	133.937	60.7832	798.534	786.64	842.117	128.056	142.076	144.919	129.555	122.575	121.114	126.596	123.945	131.563	129.97	115.257	125.087	0.00215337	0.244249
FBgn0032906	RPA2	413.59	352.681	405.328	214.241	236.865	261.038	189.018	186.294	108.373	961.271	996.979	880.627	185.72	228.982	229.235	250.477	253.331	248.749	275.787	245.031	249.112	275.713	271.493	277.162	0.00215342	0.412842
FBgn0014870	Psi	107.263	136.711	105.227	74.4377	80.1248	74.6214	41.4106	47.2223	42.8455	208.455	229.783	229.933	20.2625	23.5702	23.3188	18.9944	19.0791	20.2897	20.9862	17.5707	15.4824	33.7458	40.9638	35.5172	0.00215571	0.376513
FBgn0263198	Acn	105.342	108.545	90.1729	66.5196	56.4021	62.889	54.0417	40.6418	32.997	281.629	255.989	269.117	53.7296	63.3497	68.0208	48.1459	58.6103	60.6654	51.2225	50.4137	47.5705	105.879	110.795	105.83	0.0021566	0.419919
FBgn0033739	Dyb	23.5363	21.8535	20.121	27.9185	42.8748	28.1047	37.4798	33.2438	39.6764	21.6903	18.4024	21.1333	19.996	20.7402	18.7246	24.1973	24.8935	22.4829	23.1038	26.216	24.4685	37.2723	41.6606	35.2294	0.00216212	1.68522
FBgn0038692	Gdn1	150.969	187.854	219.525	77.7576	82.7709	81.3965	33.1142	26.657	51.8176	33.6735	20.4672	27.635	74.1488	79.1112	80.8936	65.7549	69.8144	75.9511	69.4897	64.5631	60.2652	79.4559	93.7125	83.0908	0.00216265	0.199856
FBgn0003165	pum	79.5624	81.5336	76.2257	39.3553	47.9654	48.3717	23.6122	25.1952	44.3454	175.925	176.613	189.137	49.3734	49.5935	52.348	56.4019	57.4148	59.0366	62.5818	56.549	61.1398	189.526	168.333	167.228	0.00216289	0.392517
FBgn0031390	tho2	122.923	151.517	129.914	83.1163	75.96	104.384	74.1204	61.7433	56.5899	210.019	215.706	192.762	90.3741	103.772	102.24	74.3884	76.6344	71.0595	58.9906	60.1257	55.636	109.283	86.9947	83.4175	0.00216406	0.475953
FBgn0027094	AlaRS	379.229	351.076	373.412	224.01	264.003	263.236	283.415	242.917	244.241	617.659	559.218	389.742	176.617	173.761	174.175	156.057	165.111	158.571	156.387	151.725	144.652	145.069	139.8	137.153	0.0021665	0.698161
FBgn0037203	slif	302.701	301.997	378.697	208.2	192.419	194.59	150.952	107.802	127.609	125.5	105.954	90.3246	72.1603	97.7097	104.733	100.372	115.417	108.929	120.858	110.458	107.103	224.656	230.097	217.293	0.00216651	0.392888
FBgn0037024	tzn	325.602	346.377	403.945	188.139	220.046	214.971	173.096	152.584	106.644	1282.91	1079.05	965.196	209.999	234.443	234.706	218.633	215.925	214.907	203.734	201.825	212.751	238.05	257.701	279.199	0.00217357	0.401817
FBgn0037779	CG12811	57.6303	68.9328	63.9295	32.5285	32.5858	27.6796	11.8422	29.0647	12.5022	123.663	82.844	92.0426	41.7304	52.7338	53.6739	53.2688	54.8182	51.2048	50.415	58.6191	53.1228	53.7433	61.1414	62.2816	0.00217507	0.280373
FBgn0037533	CD98hc	145.127	138.919	181.836	83.6236	83.2592	73.5572	36.2804	59.6794	52.8027	989.192	888.471	814.927	188.124	224.242	230.986	295.813	320.944	304.528	350.248	305.167	308.422	445.362	451.223	460.147	0.00218321	0.319314
FBgn0039642	CG11882	134.791	128.707	146.068	87.8888	43.7514	75.1799	65.6832	70.3737	38.426	188.729	33.7896	153.957	36.3189	33.2175	34.0994	29.5564	26.2857	25.6286	36.4661	29.5097	25.4432	41.8931	40.3555	39.1422	0.00218401	0.426019
FBgn0024556	mEFTu1	229.109	200.341	245.089	99.3917	141.382	123.276	84.7248	83.6744	122.364	653.635	513.491	461.444	154.752	152.06	154.09	174.964	173.11	169.763	172.135	162.74	168.046	159.594	162.733	162.965	0.00218417	0.431054
FBgn0000615	exu	96.8591	98.8564	121.982	61.8958	43.3878	50.299	37.452	32.225	49.0595	70.523	70.4411	61.3968	324.965	428.827	442.773	599.28	616.218	621.27	676.102	615.995	600.1	1224.68	1187.82	1145.32	0.00219131	0.37374
FBgn0004587	B52	456.122	492.189	376.81	324.8	308.032	363.574	207.91	200.819	179.833	2590.24	2383	2601.84	305.139	319.923	306.508	362.53	327.035	372.169	393.931	349.208	358.821	344.6	327.398	349.878	0.00219942	0.444158
FBgn0032229	CG5045	109.388	97.2333	123.367	42.9871	74.2563	31.6828	25.9951	46.1538	16.7642	396.42	418.552	408.948	77.5848	85.5752	77.5091	86.1717	84.3756	86.7619	84.7849	89.0675	83.5258	70.1373	75.4298	78.4873	0.00220829	0.269443
FBgn0032922	Coq3	38.9008	29.4258	27.8592	15.7336	16.1409	20.9142	5.21693	8.17409	2.32331	103.39	103.813	119.916	25.1831	20.418	21.7105	18.5188	18.3838	16.3493	19.4235	13.5127	16.5603	33.9977	25.9095	26.3265	0.00221052	0.163375
FBgn0011573	Cdc37	303.444	272.362	369.034	214.32	157.755	190.355	118.924	110.249	86.8727	337.825	326.448	318.565	78.0218	93.8934	94.1122	79.671	84.9532	79.1509	83.2276	70.6281	68.7839	134.539	139.703	133.269	0.00222399	0.334497
FBgn0039854	CG1635	36.3064	25.5122	32.0886	19.4525	15.5864	11.2539	6.43808	6.91508	0	25.9978	38.2623	33.6935	12.3332	17.8479	17.0604	16.0752	16.2246	17.8585	15.8292	16.1562	16.6578	26.418	31.6443	29.6402	0.00222622	0.142195
FBgn0010356	Taf5	115.564	120.479	109.645	78.5335	81.1389	101.154	90.5284	81.4544	80.5935	206.647	200.52	183.081	45.2424	51.2659	49.517	45.1091	44.8359	41.807	40.8632	40.4618	39.2114	57.6276	53.9056	58.5455	0.00224429	0.730648
FBgn0010772	Xe7	16.903	11.4174	15.5684	9.13093	6.97516	10.5431	2.40749	2.6884	0	34.2069	40.2041	37.4992	18.8079	19.5376	20.4823	21.5548	23.9035	24.0881	24.0834	23.8301	22.9895	43.2954	45.2751	41.104	0.00224469	0.116109
FBgn0034989	CG3356	70.0446	63.2249	52.6708	31.6716	44.3909	44.9795	22.8923	27.8163	25.7071	55.0836	56.6655	51.539	38.4166	50.0682	51.4626	51.4947	54.0892	56.1184	54.8942	51.7591	50.2261	107.251	92.0755	91.4041	0.002249	0.410969
FBgn0000370	crc	118.932	156.325	181.389	48.1747	54.8902	77.2789	15.0324	31.4403	13.3188	20.774	36.9665	37.1928	216.714	239.402	228.601	323.138	309.115	309.516	283.709	266.443	259.205	246.89	252.135	258.62	0.00225624	0.130936
FBgn0023175	Prosalpha7	797.133	713.212	876.806	429.193	378.994	390.916	237.336	328.037	406.362	2410.63	2345.71	1930.65	459.078	474.837	479.315	483.512	478.617	471.618	527.667	480.989	459.507	441.508	448.153	438.679	0.00225849	0.407069
FBgn0027548	nito	172.614	190.414	144.504	87.4454	84.6897	94.5444	79.4845	72.9909	73.164	1708.17	1669.75	1676.23	77.4138	83.7522	85.771	98.855	112.969	108.188	122.345	107.91	109.396	166.802	152.272	151.107	0.00226038	0.444581
FBgn0033816	CG4679	65.8046	57.1739	65.6171	35.2507	28.9752	25.7243	28.3592	8.46735	18.3055	150.715	166.968	122.3	38.2259	42.4788	44.7805	51.2875	56.9324	50.5811	58.218	49.5599	51.4589	82.0807	75.0755	73.6981	0.00226223	0.292329
FBgn0031633	Fnta	79.1715	56.5012	65.1451	55.0976	30.507	30.5171	13.7554	19.9625	21.3101	92.0363	138.504	118.474	69.479	78.235	71.6594	75.8308	82.2318	83.2569	86.3524	77.5067	77.6988	84.3326	87.6631	90.2412	0.002265	0.274019
FBgn0031266	Sf3b1	138.489	153.334	144.751	111.608	127.441	122.609	111.066	102.097	112.095	290.667	281.92	270.164	72.1949	73.7289	74.6775	59.9348	61.3211	58.7857	60.1477	50.6834	48.3521	65.0865	58.5901	57.6607	0.00226526	0.745024
FBgn0005674	GluProRS	190.506	226.866	229.121	166.383	187.328	158.824	129.381	110.741	122.492	157.533	145.553	118.297	108.878	107.524	104.583	86.2127	88.04	80.125	71.5938	73.1632	67.7249	89.6644	81.8996	75.6196	0.00227021	0.560895
FBgn0039182	CG5728	36.4904	35.6319	33.8669	29.9909	24.205	24.1025	25.3058	26.169	21.6732	265.536	302.338	278.649	35.5374	39.4624	44.5264	50.5994	56.6565	53.6116	55.9371	45.7778	46.2538	114.387	93.2826	93.2588	0.00227357	0.690145
FBgn0039116	CG10375	183.712	233.145	160.848	71.6017	64.0768	22.5921	30.7812	39.1231	0	489.398	525	564.487	54.0046	60.6979	63.3879	54.1945	58.0023	55.5107	54.6581	52.667	54.2403	63.4003	60.6375	60.883	0.00227709	0.121003
FBgn0004889	tws	329.785	366.67	292.716	168.608	196.851	214.937	124.908	154.413	80.5106	634.546	543.105	508.486	168.794	200.135	194.484	249.026	267.155	261.249	270.366	251.107	255.334	317.604	309.394	294.228	0.00227957	0.363771
FBgn0038666	Smu1	71.5587	62.0621	88.7334	25.791	45.6596	31.3188	21.9578	18.2278	15.6097	82.8805	78.9544	77.1572	25.5649	27.8396	26.9087	21.6982	17.2766	20.0726	17.257	18.4692	17.8788	29.0618	25.313	25.0209	0.00228456	0.25093
FBgn0038049	Srlp	220.709	274.576	288.418	110.198	155.884	107.046	56.4917	55.9991	108.817	42.5952	52.6013	53.6307	116.781	114.534	119.841	115.649	112.297	120.624	103.811	115.789	108.438	116.422	123.187	118.05	0.00228719	0.282388
FBgn0010213	Sod2	399.394	451.803	512.577	266.322	201.377	228.014	169.989	227.505	204.093	1559.21	1432.88	1204.57	159.686	180.053	191.2	180.639	168.587	188.039	190.961	170.738	184.598	110.126	201.607	219.61	0.00228977	0.44112
FBgn0031684	ND-13A	199.427	198.556	262.473	123.502	110.665	93.9617	73.5782	67.7931	44.6584	911.292	1175.49	996.083	86.5048	90.7002	101.946	96.372	106.423	113.762	102.933	98.9626	119.876	113.668	120.096	137.331	0.00231846	0.281669
FBgn0032859	Arpc2	103.81	138.852	97.6543	51.1954	51.2806	52.7918	0	24.7805	0	1015.84	1120.29	1395.26	161.001	219.419	229.814	272.999	324.023	309.849	332.565	311.708	287.918	514.452	517.249	489.881	0.00232265	0.072816
FBgn0030863	CG8188	241.399	325.956	334.73	126.831	136.069	190.076	76.8382	94.2574	99.5528	836.306	635.358	664.225	67.3373	97.4425	97.4371	70.5802	74.1516	76.362	82.1448	59.1642	62.0265	122.509	142.815	136.683	0.00232281	0.300025
FBgn0033766	Nup188	53.8163	60.27	60.8783	35.9985	45.0993	47.2497	42.8568	41.4298	42.9091	92.5101	106.722	85.1369	42.0075	57.9564	57.6721	45.8685	45.913	42.4219	43.8636	39.1399	37.0132	89.5261	76.422	74.6099	0.00232532	0.72698
FBgn0265574	Cdc5	150.392	154.088	158.385	100.922	107.849	98.0294	97.5867	76.7901	105.517	449.914	393.386	376.253	69.1313	68.9443	69.5702	71.5453	74.45	67.9969	67.9113	65.6251	64.53	79.8841	74.6302	75.017	0.00234522	0.604699
FBgn0030035	PIG-T	150.219	116.89	141.048	93.4361	74.246	73.8019	61.9684	44.4985	32.9058	167.938	125.203	122.032	63.6306	66.7722	62.1675	57.7824	56.5531	57.9292	51.3937	55.5233	55.4841	79.4044	73.1136	73.5749	0.00235341	0.341468
FBgn0263599	l(3)72Ab	86.2955	100.308	109.48	50.5569	53.8456	56.594	49.2637	46.0233	34.5794	172.715	183.959	154.423	71.4063	75.4359	75.7197	51.8346	57.6153	52.7848	46.608	48.4771	43.2581	101.128	86.1779	82.5896	0.00236785	0.438614
FBgn0286784	TER94	1995.29	1661.66	1955.39	1302.54	1339.8	1356.59	980.583	807.204	1087.08	2709.01	3819.23	3303.89	753.002	719.525	706.181	704.471	708.283	694.951	723.866	695.689	682.394	646.92	584.713	588.142	0.00237038	0.512241
FBgn0027086	IleRS	134.411	136.266	149.747	82.6547	73.9288	77.1552	85.3207	57.4141	55.2911	260.829	295.385	309.812	108.248	120.925	124.394	113.206	119.386	110.895	107.444	99.6826	91.2749	188.882	160.524	158.262	0.00237146	0.471015
FBgn0031047	Rcd-1	326.985	280.264	330.296	145.127	144.412	153.546	122.554	21.2958	93.0368	1746.28	1355.03	1192.36	104.434	129.174	136.324	126.503	128.225	132.714	137.374	119.544	145.262	165.261	164.154	169.368	0.00238649	0.252667
FBgn0011787	mRpL12	266.288	247.045	201.238	124.507	99.6185	137.713	66.1072	73.8917	106.156	827.527	768.611	718.295	83.2189	102.979	102.329	127.649	131.446	136.35	155.455	147.1	140.151	186.666	221.501	218.72	0.00240264	0.344479
FBgn0004926	eIF2beta	308.765	255.76	340.295	162.704	155.247	163.569	132.528	103.01	81.9899	947.888	874.738	709.023	220.332	235.659	244.443	260.669	268.249	265.092	296.186	246.432	237.713	330.178	355.548	331.381	0.00241228	0.35093
FBgn0010379	Akt1	168.555	222.524	179.063	114.962	103.063	118.997	77.7575	79.3051	71.4932	78.905	98.7026	83.3655	84.4886	111.376	107.187	100.767	111.842	109.149	111.994	105.029	100.687	205.499	202.662	192.195	0.00241415	0.400875
FBgn0015818	Spx	87.3362	92.4568	110.23	36.2325	77.0905	55.7928	39.4523	44.4623	26.3236	559.46	668.152	663.881	32.507	30.8145	31.04	35.7044	36.374	33.0266	43.2449	39.2974	39.356	35.8326	48.875	51.8458	0.00242585	0.380102
FBgn0000543	ecd	90.5897	70.4354	90.76	53.1388	39.1587	41.1638	29.9541	30.4616	39.5613	73.0217	56.9715	49.4767	61.2625	55.4719	55.3878	45.4408	46.8123	45.4708	45.4898	41.9342	42.6955	52.5986	50.1833	49.4322	0.00243353	0.397072
FBgn0035211	CG2211	17.695	14.5368	19.7011	11.5058	18.4286	8.60302	4.86955	3.89951	0	103.148	101.539	88.5478	28.5609	31.0932	31.5184	32.9635	33.1696	30.8656	30.9292	33.4832	37.0776	44.9339	45.6011	47.6224	0.00244004	0.168854
FBgn0016120	ATPsynD	665.063	821.433	765.855	278.211	329.217	347.087	205.831	293.284	377.545	4468.23	4539.61	4285.34	278.689	302.014	303.408	318.719	316.266	332.824	306.94	332.828	331.579	311.113	364.911	391.594	0.00244748	0.38922
FBgn0038854	CG7044	43.1145	49.0511	52.4801	24.0324	27.8769	22.9296	26.6725	18.8582	17.0543	162.097	169.576	152.654	33.4632	38.8259	39.3946	33.5259	36.8752	37.0046	33.0115	33.0091	30.4059	45.7379	37.3642	41.1048	0.00244759	0.432678
FBgn0032646	mEFTs	31.5812	37.1299	34.0454	20.5774	19.5918	22.8194	9.94463	11.6904	0	360.162	305.105	264.17	33.9101	41.4202	45.3631	52.8148	65.0225	62.0193	68.3072	64.2902	64.1563	116.199	120.656	109.574	0.00244881	0.210546
FBgn0031574	TTLL4B	4.05135	2.59238	2.7576	0	1.32349	2.64255	0	0	0	5.52829	3.43541	1.68063	3.23018	2.77276	3.82332	3.42481	3.5745	3.64441	3.73496	3.324	3.11085	4.61211	4.9821	4.75965	0.00245131	0
FBgn0035107	mri	97.827	73.5016	108.31	64.6515	53.067	55.8597	16.566	24.6266	22.7081	74.8825	70.7363	89.4052	75.4016	67.4488	75.1263	73.6758	72.2271	78.7944	75.4029	73.4747	73.7625	73.818	89.1648	90.3473	0.00245803	0.228511
FBgn0020388	Gcn5	82.611	77.9175	95.3279	59.8271	62.2812	61.8654	34.7673	42.6718	47.6964	203.908	205.104	212.249	45.3342	46.4304	43.3864	47.8113	46.4585	47.8975	45.7895	45.3135	42.0056	76.3338	73.9073	72.3024	0.00245967	0.489085
FBgn0035150	Rev1	62.516	54.7426	48.7561	43.8129	46.3808	41.6374	23.6767	26.8082	17.6021	14.9346	10.6397	11.3341	29.5611	32.3193	32.0969	31.0444	32.4067	31.8759	27.4064	25.354	23.8151	44.0165	43.1833	36.1483	0.00246823	0.410126
FBgn0083961	CG34125	126.585	123.696	139.04	47.1249	39.8029	48.5513	44.2487	40.7558	0	321.014	398.433	443.373	50.5922	52.5025	48.2015	39.7037	38.9801	41.5744	41.7419	44.9716	51.3524	68.1355	65.5533	69.6518	0.00247123	0.21834
FBgn0032015	Ostgamma	88.7258	68.37	92.2865	44.8298	38.7664	37.9143	25.5339	29.6315	13.4761	473.776	401.66	304.518	67.0461	62.865	60.2703	53.4496	50.826	49.3813	57.6206	44.7935	46.7335	82.6069	73.0967	82.6773	0.00247321	0.275246
FBgn0027084	LysRS	193.319	132.729	150.471	74.0311	78.2911	71.9342	31.361	40.4206	35.3512	263.49	215.513	165.415	177.34	190.947	183.817	185.417	194.092	185.803	186.96	178.564	176.134	236.781	238.657	236.245	0.00247731	0.224824
FBgn0037202	Ssl1	46.1546	35.6453	37.3599	23.9313	20.0177	15.4366	18.3801	13.5293	14.8775	188.074	216.677	200.417	22.5556	26.5161	25.8424	25.8089	29.4209	27.6455	27.0406	30.2027	27.8026	29.1523	34.3463	33.4048	0.00247952	0.392639
FBgn0030743	CG9921	354.96	278.944	210.933	0	98.4834	78.0122	0	0	0	325.985	290.229	333.68	100.866	129.393	134.475	139.501	155.369	148.622	179.449	128.549	151.42	233.242	206.539	180.1	0.00248419	0
FBgn0086357	Sec61alpha	947.923	748.085	951.398	556.194	445.982	488.869	442.05	386.848	350.382	2231.31	1880.66	1819.53	305.576	296.195	301.742	273.747	271.186	273.832	289.85	282.455	271.574	263.256	233.943	253	0.0024843	0.445448
FBgn0031049	Sec61gamma	911.255	701.493	987.886	442.092	424.645	362.307	276.611	293.558	202.921	1848.5	2060.7	2078.39	218.105	219.878	222.843	343.738	330.089	330.551	379.511	366.029	371.328	399.159	369.227	382.274	0.00248647	0.29727
FBgn0263600	DNApol-delta	156.61	187.379	179.076	120.629	137.02	116.57	113.934	102.738	108.626	32.5419	28.8046	21.355	93.247	100.477	101.9	85.1292	80.7826	74.4694	83.5811	68.9794	67.9336	153.33	126.806	109.456	0.00248888	0.621909
FBgn0015321	Ubc4	673.858	535.016	770.341	368.406	255.956	399.578	186.774	211.099	187.281	886.686	873.787	865.309	244.221	252.945	276.763	264.015	272.306	271.104	256.497	243.676	248.77	330.084	357.19	366.842	0.00250132	0.295649
FBgn0022160	Gpo1	2.23084	1.78927	2.26397	0	1.13608	4.59428	0	0.691225	0	7.18089	7.57492	5.59262	1.73227	1.63692	2.07962	1.60074	1.69749	1.96317	2.17826	0.994492	1.48982	1.88983	1.4781	1.91506	0.00252486	0.109996
FBgn0000629	E(z)	76.629	96.7974	99.7497	68.1528	42.5732	66.5788	29.5025	40.4343	22.5057	73.5539	83.1597	54.9312	53.7204	50.1275	50.8492	56.4641	50.7513	59.7826	54.3888	36.8084	37.4845	77.7497	65.7226	62.6729	0.00253141	0.338399
FBgn0039537	CG5590	156.206	160.783	203.636	108.016	88.777	102.736	59.8555	58.3614	76.1682	529.783	413.141	391.612	75.7469	73.9462	73.4017	67.0246	65.018	59.7069	64.4857	64.6421	67.684	46.8653	52.7488	58.0046	0.00253195	0.373369
FBgn0029093	cathD	2308.31	1840.55	2292.68	1563.23	1286.83	1354.9	1143.41	1069.51	1099.56	4235.86	3527.68	3442.38	527.943	509.244	505.312	467.533	425.169	443.7	404.783	421.303	408.902	312.77	247.818	287.904	0.00253301	0.514236
FBgn0000173	ben	752.921	625.33	869.958	260.48	281.863	326.529	247.564	290.647	262.183	3033.19	3438.6	3263.17	232.91	289.497	278.686	309.607	303.756	304.263	299.637	303.941	295.695	385.417	437.871	450.339	0.0025465	0.356014
FBgn0024991	CG2694	56.4231	48.1534	51.3942	47.4186	34.6829	39.2152	34.1117	26.5745	29.7652	145.55	167.713	146.358	49.7778	62.3702	64.7053	75.7711	78.0641	80.0126	87.8854	77.5711	82.2719	133.429	139.865	132.012	0.00255205	0.579926
FBgn0036580	PDCD-5	338.472	255.345	263.106	118.659	211.52	209.977	66.1021	92.3758	108.637	855.941	981.717	988.016	106.406	110.948	125.924	143.777	134.714	150.436	151.372	147.737	148.404	144.762	129.84	136.363	0.00255579	0.311714
FBgn0010548	Aldh-III	96.3232	60.2679	81.5926	41.6286	43.0222	36.0725	0	12.1265	0	253.947	269.913	279.105	54.5899	56.4479	57.8499	52.6304	60.2461	60.1748	61.8989	52.2249	52.0399	87.7924	79.4332	82.8201	0.00255893	0.0509122
FBgn0028577	hfp	165.98	126.985	150.088	85.4937	107.997	108.161	64.2314	72.4639	53.8586	945.882	763.09	719.059	58.392	72.6172	69.3924	67.6717	68.9716	69.1497	71.6347	68.567	67.0454	96.5129	83.2764	92.4423	0.0025616	0.430093
FBgn0038722	Nup58	132.629	144.147	119.603	70.093	71.0599	69.1561	64.306	48.3526	74.4556	447.048	363.819	385.034	48.3311	47.9825	51.2343	51.3059	56.7507	57.619	54.2862	54.2048	49.672	57.5894	65.0719	68.1317	0.00256381	0.472059
FBgn0002673	twe	177.394	156.892	161.603	113.166	118.088	131.641	103.009	99.5357	74.6848	392.182	426.561	427.401	104.206	129.568	134.677	144.648	151.386	151.631	152.094	147.937	136.84	227.597	234.105	238.355	0.00256754	0.559056
FBgn0033316	Gle1	122.681	167.041	163.214	71.7911	81.2341	73.0026	58.0474	47.2971	54.8643	531.913	478.554	489.348	54.6731	66.5616	66.7107	53.708	61.2015	60.5671	52.3564	53.4546	50.7584	88.3025	78.6094	82.5144	0.00257014	0.353711
FBgn0036428	Gbs-70E	228.638	293.885	214.18	160.332	125.557	115.607	88.3839	60.4035	64.5143	318.671	248.181	302.696	139.596	172.923	180.043	181.353	180.644	181.275	194.676	149.332	156.169	329.288	343.22	345.831	0.0025754	0.289535
FBgn0028837	CSN6	156.637	132.309	167.414	94.2299	79.8815	78.803	55.3412	47.6608	77.5443	330.139	338.418	313.827	70.7609	77.7127	82.6832	75.4192	75.569	95.433	78.1408	72.2696	77.2508	93.725	106.976	109.133	0.00257631	0.395622
FBgn0034585	Rbpn-5	80.2659	58.0329	60.5251	22.5843	25.9127	27.6764	9.91886	12.9895	20.638	6.70214	6.20858	3.11418	34.2713	44.3501	47.3545	39.9485	42.2237	43.7778	43.7105	37.963	34.9913	81.5683	86.6156	79.4623	0.00257669	0.21902
FBgn0015778	rin	444.94	460.791	554.632	319.244	313.422	363.342	266.909	235.002	244.655	1150.49	1019.98	891.758	154.571	169.381	170.999	241.539	248.502	260.493	310.893	279.404	287.114	360.471	354.412	354.99	0.00258113	0.511219
FBgn0014075	Uggt	195.495	222.382	191.451	121.581	120.364	132.73	126.808	100.435	124.196	425.399	346.984	314.38	85.9672	90.1783	89.2655	86.9739	85.993	82.9945	80.0797	72.6768	71.5834	116.345	86.9183	88.4982	0.00258172	0.576764
FBgn0047114	CG31142	32.481	52.6206	53.7619	0	0	14.8213	0	0	0	39.3654	66.0267	65.6057	26.1341	25.9359	25.1913	22.6102	24.389	22.232	26.478	17.5086	23.1986	46.4963	48.8684	40.8929	0.00258571	0
FBgn0027932	Akap200	795.769	942.285	794.798	327.639	375.476	374.009	406.922	321.74	187.367	5166.58	4248.3	4944.05	216.675	294.866	309.336	329.538	361.39	356.532	353.438	317.545	343.347	454.558	498.727	544.543	0.00259313	0.361659
FBgn0031114	cactin	67.9156	68.042	51.3468	36.7321	31.6711	20.0061	15.7232	20.7744	25.643	100.888	102.51	114.474	16.6077	17.9345	18.4382	12.202	15.3305	15.4076	13.7272	12.2946	13.2725	21.5103	27.2214	26.5819	0.00260216	0.331763
FBgn0003015	osk	180.844	177.851	143.223	105.028	133.449	127.547	71.1778	69.583	88.9354	338.238	332.203	256.549	119.225	204.321	203.903	342.294	393.46	403.016	435.578	370.721	376.082	1031.69	899.753	870.286	0.00260276	0.457637
FBgn0010352	Nc73EF	51.1488	65.6749	52.3914	33.9634	30.6062	31.2089	24.249	23.4422	16.6775	501.686	499.898	537.519	26.2608	30.2676	31.2437	33.4449	38.295	34.1411	36.9236	37.8081	34.6409	58.6601	64.6096	58.5614	0.00261132	0.380396
FBgn0259937	Nop60B	170.799	179.998	149.861	101.777	131.516	143.658	74.7224	87.2062	48.4067	473.925	467.475	485.592	347.228	457.048	473.224	498.669	574.063	548.908	568.785	523.903	510.503	758.291	905.837	875.863	0.00262025	0.420117
FBgn0017551	Rca1	395.95	411.93	478.575	276.729	281.925	237.316	258.702	228.099	204.917	218.142	201.288	178.754	199.467	220.326	213.765	186.058	177.391	183.914	189.785	181.756	174.887	182.542	194.371	193.296	0.00262226	0.537693
FBgn0038388	CG4287	27.1739	23.1993	30.485	13.5855	7.88312	12.9636	10.6412	6.08283	11.1232	45.3106	58.8372	48.9711	31.4951	38.8144	39.2197	42.7914	42.644	44.9168	44.0818	42.0453	37.9373	84.1938	84.9253	87.6251	0.00262278	0.344396
FBgn0032157	Etl1	133.818	165.59	169.418	116.56	100.981	100.435	79.1245	76.7524	61.4818	77.6622	65.4348	54.4134	133.897	143.21	144.772	120.525	120.946	114.049	108.107	106.817	95.8747	153.62	143.989	137.258	0.00262347	0.463623
FBgn0036512	CG16979	40.5097	31.0119	38.4402	28.7973	27.4329	29.5619	11.9131	11.2674	17.3648	58.1291	52.3381	45.6117	19.7218	25.7321	25.2088	29.5291	30.2267	28.5909	30.7161	28.1271	27.2782	51.5176	48.7184	48.4125	0.00263378	0.368722
FBgn0041188	Atx2	80.3935	62.9201	55.2606	27.444	22.7798	30.0795	15.803	10.761	1.48703	144.389	141.551	130.7	27.4866	24.0938	24.1346	36.4408	36.8633	38.391	54.6581	41.8238	44.0331	88.0855	87.1144	72.7374	0.00264358	0.141263
FBgn0001108	DCTN1-p150	112.226	149.144	142.271	73.1859	82.3632	79.5617	58.6878	45.08	57.5585	64.6318	57.9673	42.6041	54.6506	54.9805	58.0941	45.8653	49.9594	49.057	44.9211	42.8224	42.4672	110.882	99.4833	91.1881	0.00265412	0.399678
FBgn0036974	eRF1	81.0208	116.425	93.9227	61.6283	50.9552	65.9446	7.37429	28.5866	14.9871	553.919	558.353	610.8	216.542	248.998	256.936	265.133	287.199	261.441	256.411	260.235	239.301	266.209	297.582	293.982	0.00266447	0.174858
FBgn0032214	CG4968	167.986	157.525	170.073	46.1086	65.2727	70.775	64.7151	43.6891	0	174.979	216.49	231.927	116.25	140.271	139.651	159.473	161.368	153.457	157.106	169.175	150.101	234.748	247.052	229.721	0.00267722	0.21874
FBgn0031256	shv	106.284	134.674	165.328	87.0041	62.6361	51.7474	20.762	25.7277	17.6488	506.445	435.67	523.106	84.4504	93.491	91.6641	104.14	111.079	105.473	114.259	101.612	102.863	134.485	134.358	133.422	0.00268989	0.157865
FBgn0286813	SRPK	140.968	176.529	185.532	78.0965	89.0776	88.0166	72.8745	38.0593	55.8947	110.126	125.467	125.604	110.544	129.523	129.809	104.291	111.865	115.538	108.387	104.134	101.487	223.613	247.336	234.328	0.00269218	0.331648
FBgn0039635	Pdhb	230.151	238.282	330.981	112.237	134.95	142.319	60.9386	42.3922	40.9171	700.166	597.466	470.721	217.39	217.866	209.371	204.585	208.033	205.969	197.901	195.578	190.512	185.71	183.947	181.775	0.00269598	0.180442
FBgn0032293	Dpy-30L1	227.003	179.048	182.455	82.1419	47.4735	82.3421	11.6078	46.6531	70.8965	473.296	569.611	555.731	38.6879	38.1267	36.5722	44.9723	48.1449	55.8717	68.5066	48.9941	55.4776	48.5077	64.2997	68.2407	0.00269875	0.219466
FBgn0265192	Snp	205.515	149.576	167.694	127.602	110.123	133.701	58.4162	68.1852	64.4026	1544.01	1402.19	1476.84	90.0984	109.814	114.353	123.735	131.524	141.677	144.811	123.322	126.861	186.097	159.769	170.339	0.00270991	0.365359
FBgn0024833	AP-1mu	154.256	156.379	148.993	124.236	114.842	113.549	74.5731	78.5396	106.002	545.699	455.699	454.577	89.65	111.369	114.03	119.451	117.809	113.157	110.256	102.529	107.912	117.526	114.224	118.006	0.00272661	0.563749
FBgn0037354	CG12171	407.208	322.703	389.587	206.286	268.875	223.143	175.557	90.9635	145.593	486.173	463.669	482.712	115.84	122.809	116.354	107.741	106.427	111.04	122.39	110.329	112.516	123.905	127.985	135.412	0.00272817	0.368124
FBgn0010621	CCT5	858.778	705.165	925.903	529.148	426.825	486.949	389.388	311.803	392.925	1567.59	1325.86	1102.36	357.516	401.84	406.006	372.88	401.087	398.499	378.171	365.035	355.038	355.913	419.277	409.432	0.00273054	0.439431
FBgn0027334	l(1)G0004	162.506	184.841	208.678	116.339	62.054	110.64	80.0899	76.6214	99.698	443.054	345.719	394.478	27.21	23.6659	27.2101	14.8465	21.6925	25.0649	16.0777	26.502	19.5243	27.8008	31.5431	32.2445	0.00273843	0.461148
FBgn0051368	CG31368	79.4012	91.1338	69.4967	48.7829	43.775	40.2037	40.6423	33.6141	33.0117	97.0236	81.6849	85.9461	35.5428	41.3111	41.1865	27.5471	30.9302	30.2575	25.6129	25.8405	22.9566	36.6744	33.4474	31.6098	0.00274713	0.446891
FBgn0033055	Tbce	43.334	61.1779	61.1012	27.1859	29.2289	32.5852	13.9053	15.7351	17.181	277.912	296.45	292.339	30.8482	42.1531	46.791	44.7525	56.4332	50.4868	55.314	45.8002	43.7779	87.859	85.3963	84.9212	0.00274908	0.282716
FBgn0262126	Sec24CD	117.033	105.251	116.996	82.2128	86.7848	72.3084	68.7929	62.6444	80.1923	77.0973	83.1542	71.7826	44.4799	50.1501	46.7946	45.0636	49.1456	48.4743	51.34	43.9742	45.2948	94.3402	87.6979	84.3999	0.00276012	0.623761
FBgn0032884	Pomp	1956.49	1821.75	2517.68	808.081	720.134	840.25	696.928	585.743	726.514	4730.57	4286.12	3906.6	276.413	286.89	297.127	255.759	244.14	242.211	309.661	285.424	281.923	287.361	309.385	321.78	0.00277138	0.319125
FBgn0001179	hay	81.7766	78.6647	56.46	39.8359	32.0514	33.8506	21.0924	17.1011	19.8559	58.4533	52.8329	42.4813	40.8474	45.057	43.5976	35.3018	40.6566	37.2456	31.0832	32.4616	31.0282	51.5053	53.3158	48.6335	0.00277519	0.26763
FBgn0020309	crol	0	3.47872	0	6.0883	10.4463	6.63915	10.6115	11.8398	14.8784	12.2929	18.9955	13.3807	14.724	20.8007	23.7282	35.5657	40.4427	42.6799	59.6299	44.1398	50.3974	112.433	111.1	100.887	0.00278301	10.7309
FBgn0262115	CG17683	111.739	165.289	126.306	27.4366	30.1409	25.3352	19.3062	21.0494	34.4163	350.619	412.829	457.865	50.803	65.2114	60.3169	97.9624	98.3206	72.2381	73.2563	65.5516	67.7769	170.288	150.769	147.312	0.00278514	0.185385
FBgn0038619	CG7685	76.8487	58.7911	69.5818	37.7852	31.2971	40.2506	14.7013	22.9354	0	39.3889	37.0793	39.1497	22.5979	19.7986	24.1228	16.4513	22.2168	22.1013	26.4665	23.6118	22.9997	23.1901	30.0367	27.8783	0.00279322	0.183395
FBgn0038578	MED17	83.2629	65.7258	74.5132	46.1497	39.717	46.4981	33.9514	30.784	17.2907	81.4879	78.3604	55.882	64.2478	60.366	59.7902	56.4917	56.7929	55.2972	55.1715	55.077	49.5233	63.1275	55.5792	60.1656	0.00279745	0.367004
FBgn0035372	CG12093	85.9132	100.449	128.208	18.9381	31.8392	22.8054	20.5874	15.8451	26.6249	35.5848	30.3886	26.6119	29.7317	34.1522	37.4897	35.7569	35.6511	35.196	42.1359	33.9294	37.3254	50.4635	53.4039	51.71	0.00280345	0.200456
FBgn0042134	Capr	312.305	298.421	351.935	207.321	209.786	220.143	153.764	110.452	182.034	343.363	324.631	270.657	125.836	157.956	173.896	176.213	210.819	213.396	205.846	196.672	195.717	298.01	342.658	327.962	0.00280655	0.463559
FBgn0034854	Golgin245	16.2359	17.2505	17.3633	8.44342	12.8169	12.4757	7.95572	6.24702	2.16514	58.9386	64.0072	62.3367	28.0853	31.6102	31.5698	33.5125	37.4674	32.1734	35.9998	30.8675	28.8236	93.5401	70.1162	64.4913	0.00280872	0.321887
FBgn0086856	CG11555	351.689	443.015	291.811	113.045	152.318	123.287	68.2846	78.7877	74.9557	509.685	661.115	714.781	68.9667	96.2765	87.0363	93.9805	92.6978	96.5965	96.9182	95.6177	91.3863	128.543	131.627	127.611	0.00282675	0.204349
FBgn0031947	CG7154	193.938	207.818	152.763	90.9409	103.427	98.9666	78.7957	75.8091	74.9796	489.877	461.836	457.401	113.809	108.56	109.16	92.691	97.1255	91.8464	88.3419	84.2929	79.6973	133.363	118.005	121.726	0.00283157	0.414025
FBgn0001120	gnu	1137.28	982.678	1321.17	668.542	691.198	609.579	433.965	337.167	511.931	272.612	236.746	242.437	252.776	289.575	304.532	312.252	319.003	319.028	345.974	310.337	319.775	605.664	577.179	566.85	0.0028372	0.372862
FBgn0035121	Tudor-SN	653.25	594.708	524.995	422.876	425.452	400.586	358.307	306.835	304.434	1361.88	1352.71	1219.27	253.003	279.658	286.124	290.199	297.693	274.447	275.454	267.068	259.246	406.75	394.534	388.529	0.00284485	0.546871
FBgn0262782	Mdh1	210.54	189.999	246.054	161.661	126.307	140.815	93.4727	86.2703	112.286	457.425	382.09	310.121	433.093	404.915	402.293	391.879	391.996	411.466	389.72	387.486	381.573	459.08	498.337	496.739	0.00285127	0.451643
FBgn0000047	Act88F	96.1823	73.3651	99.9965	53.5794	85.9668	85.0318	22.3005	25.4747	37.0684	269.939	190.762	733.537	0	0.144776	0.283979	0	0.073095	0.135736	0.1619	0.08007	0.068944	0.717401	0.312169	0.097605	0.00286389	0.314767
FBgn0261618	larp	73.0867	78.6334	77.0543	61.0961	77.3298	55.2845	58.9185	49.38	48.8037	90.7342	92.3862	101.501	51.2859	53.838	53.6625	62.764	67.8823	72.3351	76.5956	72.5249	71.3788	149.323	157.39	145.696	0.00287806	0.686712
FBgn0035720	CG10077	441.145	342.152	390.689	247.64	245.189	213.285	203.802	144.721	141.193	268.409	256.055	239.928	135.409	132.826	132.943	121.892	127.278	129.365	127.515	113.581	110.728	227.2	226.471	217.204	0.00288024	0.417139
FBgn0086371	poly	124.695	106.7	87.9677	49.4046	28.3076	54.0028	30.8208	39.5275	23.5475	492.81	542.561	452.978	88.7736	92.0896	96.4034	99.5558	95.8795	95.1311	110.018	94.7557	92.1989	128.151	113.502	112.686	0.00289284	0.29401
FBgn0030412	Tomosyn	20.0871	18.8871	13.9428	10.579	7.13712	12.037	3.78402	5.77659	2.6753	6.87159	12.4641	10.3045	11.264	15.5865	15.5662	10.7756	12.7982	13.0097	12.3876	12.1761	11.0452	36.534	34.4176	31.3919	0.00289795	0.231228
FBgn0002183	dre4	289.314	384.629	411.043	165.297	161.938	291.981	130.736	105.268	85.6801	267.831	229.092	182.495	290.316	283.084	277.985	241.348	232.722	222.235	196.073	184.325	170.817	240.822	228.18	214.641	0.00290613	0.296487
FBgn0033570	ND-B14	103.785	77.7542	121.079	78.2615	42.5517	57.7088	0	21.2722	0	686.13	757.963	663.518	50.133	79.0137	76.4569	77.499	91.4065	83.7668	76.0605	81.9607	79.3994	76.2792	95.0965	103.585	0.00290679	0.070294
FBgn0031711	CG6907	301.245	227.547	300.824	123.397	138.863	128.825	105.296	125.169	102.209	720.026	659.315	633.499	105.867	113.475	110.149	89.9297	81.3401	89.9126	91.5246	93.629	86.2263	126.587	112.323	125.354	0.00290966	0.400998
FBgn0028292	ric8a	48.9633	59.7988	65.1205	35.8283	28.2513	35.4827	26.4984	27.0179	21.1984	162.406	158.211	185.54	30.3293	40.5262	40.6551	42.4562	48.5068	49.7356	58.1875	51.2857	49.8782	87.6417	81.2208	80.587	0.0029302	0.429685
FBgn0052251	Claspin	35.548	33.4358	22.9223	8.87812	9.72385	7.29248	0.914075	6.39272	1.01446	70.5185	66.4007	56.1829	9.99281	12.6705	14.2784	4.84778	5.01604	6.34324	2.75965	3.08761	2.55216	51.9285	49.3103	48.1661	0.00293283	0.0905408
FBgn0015546	spel1	79.4742	75.0562	92.5433	52.396	54.5723	50.5191	45.3489	40.393	48.8579	64.3149	68.5295	63.3617	50.1632	53.3786	56.4435	54.5031	58.9675	56.2585	56.3047	53.208	51.0513	118.11	111.423	103.177	0.00294225	0.544776
FBgn0035722	CG10075	48.4093	30.2184	44.6196	18.7928	0	20.7596	0	6.89659	0	77.0944	97.6605	90.7972	36.1282	35.7074	40.8574	37.3024	41.4154	37.9821	41.074	41.6519	40.5907	60.528	61.7011	59.5764	0.00294852	0.0559573
FBgn0038252	BigH1	1978.71	2217.63	1555.69	1266.96	1174.52	1089.61	620.734	716.532	580.766	1928.05	1920.24	2009.91	465.131	526.675	523.757	481.716	488.706	484.544	443.71	404.222	392.742	522.326	523.642	524.159	0.00294854	0.333453
FBgn0004921	Ggamma1	216.091	164.906	182.015	49.4811	53.2516	55.9746	46.5014	63.8882	86.0679	654.4	774.243	837.423	61.4685	62.6788	59.8201	82.8818	100.262	83.1371	104.681	115.437	120.253	120.774	117.029	120.542	0.00295194	0.34894
FBgn0039403	Sld5	156.346	109.623	140.52	83.2214	67.2006	65.8265	38.7189	36.1985	51.194	134.309	127.377	157.945	78.3869	86.4445	81.1234	87.4723	81.8188	74.0278	69.6284	70.3311	71.0789	57.6064	68.0076	60.7031	0.00296774	0.310246
FBgn0025457	Bub3	188.49	151.818	198.879	123.68	102.91	103.917	50.936	79.8469	35.6992	951.834	1003.3	971.137	91.7756	112.1	120.657	112.61	123.824	120.645	130.92	111.263	112.962	175.331	193.684	192.737	0.00297942	0.308765
FBgn0038976	Pfdn5	393.492	328.235	263.548	106.429	76.0849	126.073	0	83.2285	0	653.815	701.344	720.861	146.206	138.636	147.455	166.997	158.304	167.001	196.736	181.083	183.164	195.317	192.666	195.463	0.00298314	0.0844723
FBgn0032350	CG6287	197.876	185.132	148.695	160.624	163.597	134.9	37.2536	46.8234	77.7632	69.0503	88.6087	90.8195	143.34	152.52	151.866	188.83	187.014	203.36	211.869	202.312	201.602	238.036	264.77	244.967	0.00299265	0.304381
FBgn0034963	Not11	45.7312	70.202	58.1635	8.21755	0	18.5696	13.4321	4.21293	0	70.9782	84.6825	61.7403	13.9112	29.2219	25.3858	20.4928	26.7775	27.3117	29.7123	28.0145	26.9498	37.1096	46.224	41.023	0.00299628	0.101352
FBgn0000579	Eno	1880.06	1492.25	2085.72	996.735	1047.22	962.697	592.34	584.457	754.681	4767.34	3575.86	3013.71	1191.93	1259.04	1264.52	1262.7	1317.43	1296.87	1245.05	1240.99	1230.22	1062.09	1260.9	1243.03	0.00299637	0.353878
FBgn0040309	Jafrac1	5009.73	4266.32	6050.83	3077.45	2704.56	2899.69	1765.29	1832.2	1718.18	9216.16	7006.45	6493.94	1231.05	1260.52	1266.03	1295.96	1278.44	1298.56	1401.22	1338.06	1311.6	1501.96	1528.13	1473.38	0.00299978	0.34682
FBgn0010551	Phb2	533.368	385.605	397.455	267.116	234.646	269.805	88.2895	148.004	92.2691	888.103	896.044	839.901	182.511	196.499	201.086	240.841	254.23	278.884	270.263	263.624	262.885	306.108	356.628	347.594	0.00299989	0.249587
FBgn0032961	CG1416	206.981	307.848	284.431	113.961	150.386	149.554	61.9512	76.9215	65.6542	370.031	442.799	584.258	251.077	262.721	260.163	286.938	283.598	292.969	281.337	280.057	280.08	285.541	296.7	293.316	0.00300048	0.255895
FBgn0035271	CG2021	136.229	190.906	213.861	78.9784	42.554	63.541	34.5895	33.5298	23.7067	246.627	341.133	280.398	29.1677	60.2918	67.4713	59.4261	62.2277	73.601	64.7706	65.0637	64.0596	90.6657	120.728	122.867	0.00300817	0.169735
FBgn0260780	wisp	328.538	298.924	373.092	244.814	233.469	221.993	197.269	154.895	163.205	172.747	171.695	177.658	164.157	179.617	181.349	197.672	199.279	209.406	202.435	192.707	190.359	366.163	365.009	349.56	0.00300869	0.515084
FBgn0036728	UQCR-Q	271.4	287.166	283.065	222.273	263	303.062	91.0882	0	105.844	1832.44	2120.11	2016.55	302.93	291.278	312.546	322.349	324.299	312.63	314.642	365.26	364.148	251.761	294.657	309.863	0.0030121	0.233989
FBgn0021825	DCTN2-p50	143.413	166.997	170.11	92.611	84.5099	97.2206	76.7259	57.8619	92.7085	463.216	444.276	385.083	79.6155	81.2314	82.2533	69.493	73.1065	74.6701	73.8996	68.3712	65.7533	84.3092	92.0525	91.8778	0.00301262	0.473021
FBgn0040773	COX7C	900.749	803.715	771.767	440.495	435.657	480.488	0	315.452	0	2013.45	2491.61	2308.44	359.904	298.725	305.693	317.191	309.054	331.37	379.784	384.438	419.585	377.032	311.745	314.984	0.00301426	0.127392
FBgn0030067	Rbm13	85.7385	115.631	103.205	43.3368	55.9201	44.8952	26.7885	45.1597	25.4974	351.15	477.368	505.806	39.0902	46.9438	53.2221	48.2648	54.9884	53.2771	50.6709	50.6292	47.8907	101.198	95.3162	96.4533	0.00301779	0.319939
FBgn0037756	CG8507	316.207	427.075	368.395	137.245	179.367	166.783	123.285	148.94	67.2356	1305.16	1154.95	1428.47	178.331	213.153	225.43	219.883	242.859	224.075	241.01	219.026	217.528	350.934	310.099	319.598	0.00302537	0.305359
FBgn0053502	CG33502	94.9736	72.3578	120.818	58.5552	67.9298	35.3745	6.28493	7.20431	4.63212	13.4854	16.8057	55.6979	62.575	63.0668	75.1646	71.3131	74.2498	68.9949	82.1222	73.8304	78.1051	88.1266	102.62	92.5057	0.00302553	0.0628888
FBgn0052857	CG32857	94.9736	72.3578	120.818	58.5552	67.9298	35.3745	6.28493	7.20431	4.63212	13.4854	16.8057	55.6979	62.575	62.9706	74.976	71.1105	74.0854	68.2735	81.4883	73.629	77.1023	88.1266	102.415	92.5057	0.00302553	0.0628888
FBgn0285970	CG32500	94.9736	72.3578	120.818	58.5552	67.9298	35.3745	6.28493	7.20431	4.63212	13.4854	16.8057	55.6979	62.127	62.7398	74.8817	70.6944	73.8911	67.7301	81.061	73.0985	76.8752	87.9877	102.003	92.44	0.00302553	0.0628888
FBgn0028691	Rpn9	467.356	389.054	359.392	343.603	319.612	289.92	141.264	202.808	159.987	1343.99	1304.55	1087.44	188.258	221.594	211.353	209.517	220.6	217.105	207.777	206.108	194.934	285.345	278.672	264.76	0.00303895	0.41459
FBgn0039581	Moca-cyp	79.2505	53.1714	57.6098	23.9858	37.7487	20.0671	12.7328	11.4812	10.3125	703.351	617.894	634.151	59.6086	64.714	69.1357	71.8352	87.3251	79.2991	80.7808	71.4368	70.7613	107.538	92.0133	91.6777	0.00304263	0.181688
FBgn0024912	agt	48.8853	70.4961	61.9834	55.4359	38.7448	39.4184	7.69917	17.5657	18.4447	221.9	235.299	195.863	29.5543	44.0779	36.0654	27.012	26.9476	23.9962	21.1116	19.0426	20.6368	34.1575	30.0357	28.7554	0.00305727	0.241004
FBgn0034876	wmd	124.304	101.679	151.557	24.7529	42.0707	48.1515	16.3622	34.898	29.9746	313.513	403.668	325.618	60.2355	64.5738	74.2659	66.9992	73.8717	76.0848	75.4697	77.25	79.6445	115.9	132.752	135.362	0.00307239	0.215169
FBgn0264561	Glg1	63.5422	76.6066	71.0808	37.2291	50.5793	46.2664	33.1625	25.7391	40.9885	315.061	232.288	219.605	61.5251	68.1453	68.481	77.384	79.2274	83.7834	81.7924	76.755	73.2993	128.094	105.898	114.895	0.00307634	0.472898
FBgn0013749	Arf102F	1195.82	1341.99	871.441	376.982	447.528	392.896	260.042	256.232	208.045	3146.93	4268.85	4568.57	260.157	343.185	333.978	330.297	323.381	322.778	339.396	316.474	301.463	407.571	338.979	354.976	0.00307777	0.212457
FBgn0028700	RfC38	348.294	304.375	379.175	252.767	191.38	202.501	165.15	178.326	109.505	540.229	509.216	495.818	219.545	213.434	198.923	211.27	206.602	206.123	209.445	196.451	201.809	215.552	203.035	202.561	0.00310353	0.439002
FBgn0263863	mRpL45	121.23	90.7953	133.353	53.9875	50.7079	61.8655	32.672	35.6246	21.5976	128.158	103.216	93.4643	66.8197	66.2728	66.7386	71.2321	74.9372	67.354	69.3285	66.6756	65.3277	86.8904	92.0723	97.297	0.00310625	0.260277
FBgn0051040	Cog7	23.3301	17.0404	17.394	12.4118	8.51443	12.2437	5.33096	5.93084	2.46516	9.0471	10.1565	6.55747	18.0558	18.2161	19.0096	19.492	20.6483	19.064	16.6817	18.8321	18.5611	34.3866	33.0181	31.6073	0.00310988	0.237637
FBgn0261276	Opa1	47.5811	66.0897	55.7624	27.6892	38.0439	38.5134	14.0207	22.5719	11.0675	139.168	137.156	134.227	70.833	75.513	77.4298	66.3875	77.6587	72.3743	69.6346	65.829	66.4143	112.871	99.0046	96.5146	0.00311036	0.281292
FBgn0035357	MEP-1	106.469	110.465	130.364	88.026	78.3575	91.1242	64.2736	63.6941	71.0739	1312.78	1119.13	1067.82	63.914	69.6818	75.7036	78.9662	86.2916	88.0249	88.5451	81.2372	76.469	210.767	169.584	178.5	0.00311749	0.573115
FBgn0026083	tyf	367.843	291.311	350.289	241.872	222.177	238.428	194.954	160.823	171.644	225.795	223.498	231.95	124.444	138.091	136.55	112.184	123.485	127.888	124.997	110.536	109.093	252.87	244.067	218.668	0.00312317	0.522487
FBgn0025716	Bap55	217.041	271.977	286.825	171.384	106.012	99.4599	92.4615	105.548	46.0515	907.462	856.178	843.545	131.547	124.773	127.175	115.954	116.435	111.629	126.953	112.64	114.51	125.292	107.156	113.866	0.00312905	0.314575
FBgn0261065	Cpsf73	99.1273	112.365	133.047	79.2796	62.2902	60.842	50.3451	47.9395	33.8619	60.3032	56.5142	32.4311	76.838	78.8124	82.1032	71.5895	75.0909	72.7076	72.8205	68.2636	65.2419	90.5471	85.1781	82.272	0.00312949	0.383545
FBgn0010355	Taf1	81.1972	95.7042	89.9819	70.4315	66.1518	76.5046	56.4391	57.2281	63.1506	278.324	272.401	254.51	40.6308	46.322	45.2222	40.4778	45.4529	43.0824	38.5386	37.5703	34.3318	67.101	58.9173	58.0168	0.00313321	0.662529
FBgn0015351	CG14906	65.466	39.8808	58.0124	22.5873	12.0895	11.4751	7.0012	4.82361	6.11414	18.8422	16.6952	15.7337	18.5941	17.2243	16.4536	9.78309	12.4962	12.8422	8.95767	8.56175	8.51485	22.6821	18.3867	18.7933	0.0031356	0.109813
FBgn0031057	Ubqn	234.325	191.631	234.537	126.661	142.372	133.254	88.1889	78.8829	122.41	1832.16	1470.32	1413.56	97.04	115.239	119.079	131.637	141.814	149.18	148.725	142.132	135.059	238.826	220.811	230.437	0.00314141	0.438282
FBgn0037299	Vps37B	82.5372	83.6759	73.5048	39.0243	44.978	55.2482	45.5841	33.7412	49.8955	282.827	285.2	277.604	32.7445	34.0672	32.911	34.6472	40.5205	39.8026	37.3137	34.6496	32.7436	66.3241	67.5441	71.1018	0.00315631	0.539054
FBgn0031304	CG4552	78.5899	78.7943	102.536	50.8635	51.35	51.0145	35.6428	36.3418	27.7425	113.343	93.9919	96.1034	35.7504	37.1464	36.0782	36.5504	36.6033	38.0702	35.2678	34.282	31.1993	54.299	52.9815	55.5035	0.00315635	0.383683
FBgn0038965	mats	318.073	370.933	426.431	303.407	211.562	205.712	156.671	182.573	146.373	396.638	447.958	457.589	124.328	148.509	148.203	162.748	140.693	156.828	158.318	147.271	154.649	159.443	158.993	159.825	0.00315945	0.435361
FBgn0039004	Nup133	113.263	121.596	106.531	87.4268	78.5062	83.5724	58.6577	51.7889	75.1395	197.794	202.341	170.471	61.1311	64.2589	61.9794	53.2951	55.8585	55.3169	50.7024	49.0912	48.2276	84.8255	71.2266	71.5219	0.00315957	0.543619
FBgn0261268	Cul3	131.782	176.881	193.147	89.0781	73.6187	92.2793	47.2366	54.701	47.3444	92.2177	104.457	89.0934	106.887	119.718	119.662	101.323	94.8949	87.313	89.0581	78.0322	76.6903	159.047	135.181	133.931	0.00316057	0.297488
FBgn0039882	Rift	33.2721	27.5839	23.3905	10.7825	12.1462	12.0611	7.76273	10.5532	6.10341	75.3427	79.643	76.4162	19.9856	18.9649	21.4407	20.418	25.3034	22.1434	26.5765	25.8293	22.9846	35.6185	38.7525	37.996	0.00316399	0.289856
FBgn0038738	CG4572	179.617	141.618	196.352	72.0281	55.6967	65.9684	43.6188	47.1005	72.72	537.45	459.291	418.534	66.6845	82.0451	85.4785	88.1312	92.3988	91.3375	89.0992	89.0576	87.0415	152.25	148.644	146.91	0.00316455	0.315771
FBgn0034853	Ice1	63.4423	79.3249	77.7128	49.5426	55.5947	53.0382	42.8431	39.6799	40.1192	35.229	33.9683	34.7233	67.7949	71.7292	70.9548	62.3425	63.9027	60.8178	57.6285	53.2293	49.4546	103.878	88.643	88.3715	0.00316746	0.556251
FBgn0040660	CG13551	7954.44	6633.98	9367.29	4944.05	4300.88	4129.01	3102.8	2756.01	2970.44	5475.86	5039.37	5339.21	578.836	507.351	481.095	415.553	398.921	415.147	430.757	447.035	435.237	386.214	449.849	428.735	0.0031745	0.368566
FBgn0000455	Dip-C	54.9723	42.2823	52.9644	28.2584	38.0129	28.2461	25.0076	20.2227	24.6572	117.509	121.998	98.4668	26.8955	34.9024	32.109	34.9239	33.1167	35.9665	34.2055	31.0164	32.3113	51.2087	51.1075	49.9435	0.00318351	0.465237
FBgn0032198	eEF1delta	566.023	764.903	576.835	293.491	258.362	313.983	189.377	247.957	186.346	3086.85	3329.38	3230.02	272.999	337.117	331.707	327.466	364.284	364.995	362.058	339.977	338.021	646.011	599.557	570.781	0.00318627	0.326918
FBgn0039348	Npl4	252.428	286.505	346.845	180.789	151.184	154.083	93.4195	98.0038	128.945	79.2308	60.6776	47.9036	156.045	166.733	163.918	141.517	150.971	143.954	144.386	138.687	139.8	202.477	195.687	186.596	0.00318811	0.36168
FBgn0010038	GstD2	30.98	19.7076	25.1137	7.98461	13.0861	19.5916	3.59335	4.73529	0	15.8817	10.2053	27.4028	0	0	0.124158	0	0.117606	0.474764	0	0	0.237928	1.57195	0.955384	0.50298	0.00319089	0.109875
FBgn0283536	Vha13	314.143	289.95	231.923	112.255	76.06	106.051	47.0146	89.8223	111.879	992.769	1157.7	866.176	425.137	462.79	461.973	642.831	626.78	608.695	769.955	703.225	722.046	726.644	785.294	744.94	0.00319575	0.297502
FBgn0024973	CG2701	39.1881	28.2733	32.6643	18.6026	13.1076	18.0654	8.2688	9.89191	13.9363	52.0724	57.9228	54.1996	45.3876	43.6216	43.1545	43.3902	44.0058	40.5779	46.893	43.2102	40.6744	47.3967	52.5742	49.8475	0.00321591	0.320568
FBgn0037580	DppIII	126.97	137.395	118.271	54.3289	38.8864	11.9646	78.6364	61.7597	49.0449	377.85	352.786	244.992	166.553	198.914	203.462	236.185	252.435	242.679	254.689	245.7	231.281	368.226	367.408	334.117	0.00321717	0.495094
FBgn0032400	CG6770	3417.68	3156.05	2486.72	1413.45	1589	1479.52	1264.48	1275.68	998.244	6994.05	8635.11	7091.15	1143.51	1467.53	1492.15	1529.41	1741.01	1691.26	1929.54	1707.74	1765.57	2384.55	2802.98	2755.39	0.00322326	0.390532
FBgn0037689	CG8135	31.8808	32.8699	41.8185	20.6474	12.0411	17.1638	15.4514	12.9224	9.14245	15.0666	16.0921	13.5652	13.2133	17.9251	17.7047	14.1854	20.58	20.0903	20.364	20.1936	20.2498	45.8959	49.2093	46.433	0.00324506	0.352037
FBgn0037664	CG8420	38.333	27.9284	30.4016	13.2741	12.6722	24.4575	8.47742	8.482	0	513.596	442.029	525.175	23.6053	36.8932	33.8856	50.0395	50.3242	45.4306	46.2161	39.9813	44.1214	56.6156	56.5239	64.8115	0.00326281	0.175449
FBgn0036301	CG4069	64.6632	87.2735	81.5622	32.7943	25.2537	38.6951	32.3397	29.0116	37.0622	110.929	129.846	113.477	48.8496	47.2574	48.6884	40.1987	41.2732	42.894	40.3582	37.5015	37.1049	58.121	58.4542	63.641	0.00329735	0.421473
FBgn0001989	ND-B17	66.2124	82.4593	85.119	28.1782	56.3187	38.0269	27.6736	0	0	643.191	671.768	600.679	143.936	136.526	144.218	136.58	142.638	131.609	148.573	138.999	138.105	127.955	114.712	126.117	0.00329884	0.118369
FBgn0030263	CG2076	726.471	555.73	777.171	305.446	269.411	298.065	288.193	205.145	204.403	1131.58	1034.77	1020.82	122.229	126.465	118.925	95.4793	94.0163	98.8555	87.3238	90.277	84.5042	92.3218	78.2976	86.1111	0.00332517	0.338813
FBgn0026250	eIF1A	596.442	707.983	653.339	376.225	372.005	386.124	145.016	227.761	344.278	1452.03	1316.39	1237.96	925.919	931.741	877.777	790.962	953.332	865.057	813.197	877.041	854.223	634.08	749.629	685.509	0.00333962	0.366262
FBgn0003654	sw	153.357	151.542	227.532	98.46	110.533	117.914	16.7788	25.4297	18.3829	194.207	165.815	426.586	78.2127	77.9033	80.053	66.0374	74.9755	72.3956	67.1232	64.789	65.6704	79.2157	82.846	82.7076	0.00334572	0.113801
FBgn0026181	Rok	20.7446	23.7371	22.207	12.2777	20.0627	20.5432	10.5974	6.53194	12.5672	80.4256	67.2667	73.0623	25.9058	35.4217	37.4154	32.8439	36.1777	37.3192	36.2496	34.2329	33.471	94.008	89.2881	82.6413	0.0033593	0.445301
FBgn0267385	PyK	2470.59	2432.21	3144.04	1878.11	1803.57	2022.83	1202.87	969.327	1252.13	4520.11	3100.78	2402.91	882.55	848.167	823.189	816.546	796.907	799.533	781.031	718.476	730.504	710.904	717.061	737.115	0.00336749	0.42555
FBgn0032290	CG6443	64.7523	92.0892	77.8536	29.5853	24.7876	28.1348	14.9863	10.1219	28.7525	259.271	256.433	282.061	41.4052	43.6857	43.614	54.4823	48.1415	53.3358	53.0322	51.3709	48.6068	56.6798	56.186	54.3887	0.00336929	0.229493
FBgn0026326	Mad1	72.8144	78.5496	56.3417	30.8559	30.8537	44.9363	25.2726	29.5867	22.2849	361.133	349.459	341.874	34.1663	40.705	39.3853	39.6948	43.2566	40.5156	46.924	39.5887	37.7173	76.3903	68.7002	67.4608	0.00338038	0.371411
FBgn0037469	Dpck	122.503	115.443	167.612	62.9853	46.458	26.2952	27.3237	27.8815	0	102.3	88.6047	85.8876	33.1198	40.0364	40.6639	38.3942	34.7587	32.3668	35.3657	34.9456	32.7903	45.5296	38.2698	42.4572	0.00338644	0.136122
FBgn0028490	CG31705	167.947	134.505	187.829	76.6666	93.5586	81.8911	69.9208	55.6296	45.5275	568.178	395.917	424.91	29.317	33.2249	31.2323	26.9922	26.3524	29.5267	25.3091	24.6761	23.6626	33.8263	26.7228	34.0421	0.00339052	0.348938
FBgn0024227	aurB	248.168	197.633	189.404	145.794	113.567	125.484	102.04	85.1513	74.7782	833.668	683.305	631.426	138.926	124.063	130.738	115.033	106.617	103.752	94.0072	91.2186	99.8991	107.19	105.17	109.369	0.00340928	0.412418
FBgn0030242	sofe	135.823	156.505	149.768	105.307	97.19	116.264	76.5359	51.2858	86.8619	13.3181	12.2676	6.51142	46.9426	59.0255	62.5934	59.9858	62.4323	59.98	59.6337	57.3553	51.1984	87.309	96.3687	92.2357	0.0034105	0.485605
FBgn0030687	RpIIIC160	12.8913	11.7573	17.5886	6.70291	6.5548	6.84553	2.82288	3.09583	1.14074	7.52664	7.40151	6.60663	17.3555	18.6811	19.8852	21.4117	23.4051	20.1885	23.0916	19.15	18.6738	44.4277	41.4816	38.5622	0.003412	0.167138
FBgn0032487	Ski6	108.501	102.467	76.8774	44.6208	34.2541	48.5525	29.186	38.9101	29.6028	68.8364	90.5511	68.4901	36.5526	41.8535	40.7833	38.0655	39.653	37.4688	40.5831	36.4769	39.8721	45.3245	46.3507	42.241	0.0034131	0.339415
FBgn0031068	Alr	54.5836	76.2212	80.884	44.4168	31.236	55.9837	21.4151	14.573	19.8559	47.273	55.1829	85.9265	25.188	26.2403	31.1773	26.9408	33.7283	28.5468	33.0881	35.7906	29.4548	44.3994	56.0048	55.5741	0.00341736	0.263802
FBgn0004868	Gdi	1432.28	991.967	1309.57	748.861	708.535	695.898	447.661	420.968	414.634	1295.61	1093.24	800.577	384.184	392.877	398.891	414.047	417.115	422.216	410.757	388.62	385.049	445.788	458.13	453.956	0.00342559	0.343687
FBgn0036666	TSG101	108.863	141.62	129.233	48.4801	76.0356	60.7891	60.4803	38.8023	27.5997	662.727	646.276	724.193	39.1177	49.8567	51.1618	49.5378	56.9189	52.0412	51.7275	51.8087	49.4128	56.3736	64.7561	69.4679	0.00342655	0.33415
FBgn0036263	thoc6	142.416	125.071	173.868	65.3208	64.1525	60.7506	58.0679	38.1457	25.2487	345.585	357.437	264.58	44.2116	52.587	52.603	40.87	51.3967	50.45	45.0124	48.7266	45.8791	74.685	70.5261	75.3294	0.00342684	0.275203
FBgn0040077	primo-1	404.887	329.209	499.955	162.288	182.74	127.304	100.75	114.796	78.9188	525.052	533.798	467.814	154.671	137.059	135.858	134.885	140.839	128.939	139.909	139.235	134.69	134.45	125.585	115.916	0.0034346	0.238616
FBgn0004584	Rrp1	44.9332	35.3883	32.2739	12.3867	15.3938	16.7067	9.33798	11.0417	1.06871	36.3009	32.7291	15.3441	46.8291	50.2922	54.4398	53.8228	57.7157	52.5536	62.6933	51.666	50.1032	120.73	124.331	116.177	0.00343534	0.190491
FBgn0030521	CtsB1	313.07	313.717	421.812	226.199	206.874	257.89	107.347	129.375	127.704	1162.17	1038.37	871.092	86.5717	93.9742	92.755	100.702	106.659	99.9388	86.9528	91.239	95.8579	98.7449	93.094	104.79	0.00345678	0.347536
FBgn0014869	Pglym78	424.856	371.51	532.004	253.88	192.61	221.593	143.911	152.809	153.236	2165.2	2004.08	1870.07	309.012	352.429	371.919	375.22	391.555	406.072	390.817	398.318	371.424	369.822	466.054	468.42	0.00345834	0.338728
FBgn0037679	Aduk	31.4386	24.2764	36.6868	14.0986	11.3417	10.0054	7.86437	5.19381	0	4.02117	4.94216	3.98625	33.8989	32.1186	35.0488	42.6926	36.5402	41.8216	43.7195	37.1675	34.6693	53.5793	54.7756	51.6628	0.00346644	0.14132
FBgn0028695	Rpn1	766.123	700.767	897.301	469.178	449.309	447.048	429.849	380.204	436.152	1792.32	1528.12	1259.47	189.251	213.735	216.461	171.608	181.091	173.057	171.585	169.941	163.928	197.975	193.094	198.616	0.00351113	0.527117
FBgn0039117	tst	40.7737	48.5877	52.8525	36.4868	29.9644	37.4234	25.8944	24.1755	20.534	59.6347	57.9399	47.2485	27.7813	29.6681	30.9933	24.0278	24.9112	23.2767	20.6936	20.6655	19.5446	44.8648	38.6075	36.0939	0.00352032	0.496462
FBgn0086356	tum	80.177	69.7882	99.0539	53.997	56.6178	45.7526	33.0949	24.0592	24.5289	166.16	156.803	183.308	93.3907	115.326	117.212	141.318	154.987	152.346	160.228	149.826	155.481	262.525	273.931	276.466	0.00352534	0.328019
FBgn0035210	msd5	151.537	157.342	207.265	64.5406	61.3902	64.6381	66.8137	37.1428	35.878	86.8714	130.839	115.715	58.6032	58.8723	55.0945	44.0727	47.8142	43.7266	50.0984	48.8415	49.742	52.3623	60.3905	56.7752	0.00353074	0.270922
FBgn0035763	mrva	399.496	351.961	437.284	246.244	220.917	234.751	180.547	147.918	229.217	805.47	732.99	696.914	92.6246	94.0796	98.6384	79.7225	80.2526	76.4177	77.9161	75.6776	79.2266	122.461	109.923	109.825	0.00353125	0.469137
FBgn0031233	Tbc1d15-17	97.9681	89.1175	69.9878	51.2775	44.1797	46.477	36.1641	34.7402	30.5231	292.481	294.826	309.554	30.7312	40.9001	41.0802	44.9532	47.2054	45.5294	51.5956	45.3087	42.7224	76.578	80.3086	76.335	0.00353467	0.394546
FBgn0261381	mtTFB1	52.3947	35.9433	43.4928	31.3656	25.9326	29.2503	15.7636	14.0335	13.0257	69.4929	68.6862	71.9355	99.1655	113.037	106.819	120.214	125.942	137.809	134.559	126.217	125.399	176.736	172.264	181.115	0.00353759	0.324832
FBgn0010516	wal	525.703	515.821	618.457	267.147	304.684	319.459	165.464	284.409	118.998	1682.9	1573.62	1631.88	274.23	256.834	274.106	259.791	243.608	247.882	227.701	231.046	234.695	179.552	171.047	187.683	0.00354068	0.342697
FBgn0024983	CG4293	83.8605	61.4617	75.5286	52.513	39.1282	54.2679	34.9438	25.2894	29.5266	99.9803	95.1495	98.2772	26.6835	34.0423	34.697	34.5608	35.9291	33.9723	38.3984	32.9073	33.4464	49.9284	51.9213	48.9197	0.00355171	0.406428
FBgn0035642	CG18586	36.1325	45.2609	43.142	30.1278	25.1269	29.1788	14.2323	17.0821	3.98553	38.7655	52.5072	46.7667	28.1602	33.5477	34.3956	30.0209	33.574	32.4827	26.5197	28.0491	26.5355	65.3513	66.5504	60.5555	0.00355395	0.283453
FBgn0029866	CG3842	35.625	29.7135	34.8424	7.68558	14.2246	26.8496	17.2274	11.7391	7.01137	53.7542	44.7011	43.4626	20.5604	27.9812	25.8463	31.1985	29.9264	33.2471	39.7614	35.8717	33.1958	50.1921	55.4037	54.676	0.00356804	0.35913
FBgn0283439	CG46281	50.1815	37.6785	39.6911	31.3196	24.9587	19.5211	14.5607	14.2744	19.8774	190.095	203.596	191.858	37.5649	41.6326	44.0406	49.5989	56.1636	49.9722	57.3856	53.1266	52.8723	104.995	99.5868	99.757	0.00357569	0.381905
FBgn0283438	CG46280	50.1815	37.6785	39.6911	31.3196	24.9587	19.5211	14.5607	14.2744	19.8774	190.095	203.596	191.858	37.5649	41.6326	44.0406	49.5989	56.1636	49.9722	57.3856	53.1266	52.8723	104.995	99.5868	99.757	0.00357569	0.381905
FBgn0002719	Men	461.602	423.31	588.964	223.704	230.313	246.505	197.461	141.535	166.538	186.562	174.129	131.147	141.541	147.304	143.102	124.245	126.004	124.102	113.698	109.46	105.732	160.875	156.159	147.615	0.00357942	0.342996
FBgn0027363	Stam	209.563	197.686	258.469	115.723	121.2	122.305	92.4227	75.156	109.742	389.712	311.874	343.228	37.6692	43.3416	45.5708	37.9749	39.5201	39.8589	40.2426	36.0252	32.6411	50.9755	48.9889	49.1718	0.00358269	0.416573
FBgn0032390	dgt2	108.644	85.8422	130.824	54.1248	36.4016	38.1427	23.4113	23.4178	0	84.3122	102.069	67.1853	73.4685	78.876	81.3795	86.8802	99.8594	98.504	102.389	93.7914	102.074	115.661	112.998	104.703	0.00359526	0.143952
FBgn0029095	aru	12.527	9.83977	13.2608	4.79193	5.848	7.11344	4.04361	2.63467	0	7.60806	7.62881	6.1283	6.3637	6.10708	7.75012	8.31584	7.22285	7.61844	7.69604	7.42961	6.00705	10.1305	9.70436	9.13776	0.00360871	0.187447
FBgn0033859	fand	56.0117	56.8779	71.4268	48.6154	40.6397	39.2726	28.8723	25.6566	32.0178	139.839	143.722	137.507	30.1981	33.6979	34.453	28.6766	30.5298	27.9527	27.7454	28.2194	26.1621	47.6418	48.0284	44.6294	0.00361445	0.469555
FBgn0004597	CycC	78.9886	64.1163	86.4425	21.8142	39.296	42.1454	26.8905	36.0055	20.3771	415.926	470.496	436.945	72.3183	66.3015	69.1046	69.9343	72.2765	71.2456	72.0311	76.9642	73.6703	70.3163	76.117	79.858	0.00362448	0.362771
FBgn0002914	Myb	100.209	151.813	144.429	55.0712	70.2685	55.5437	36.0769	31.7013	19.3146	207.343	182.669	178.042	49.2645	70.1958	69.5199	65.8193	75.2831	67.2075	67.5495	62.5072	61.5285	126.816	132.46	126.908	0.00363121	0.219681
FBgn0031093	CG9581	74.7727	105.056	94.7759	59.9221	48.8249	41.8803	22.3408	25.7543	38.9952	208.294	174.153	172.571	47.2151	48.4075	50.785	47.5476	42.8307	44.472	42.117	39.7044	38.1788	48.2198	52.2448	55.7242	0.00364446	0.317149
FBgn0043796	CG12219	30.5261	32.9308	39.2931	21.3823	26.6089	25.8312	8.4497	16.2827	7.14002	28.7986	28.8416	30.6932	27.5178	32.4128	35.4071	35.67	40.1201	38.4625	39.4609	35.4527	40.6464	58.7621	66.2512	69.1624	0.0036482	0.310194
FBgn0011327	Uch-L5	481.818	616.021	637.477	298.676	306.016	324.815	285.404	280.056	239.017	1752.26	1976.29	1759.99	185.574	207.04	218.753	199.817	192.557	186.865	199.045	176.177	182.611	242.493	212.156	204.608	0.00365308	0.463591
FBgn0010278	Ssrp	124.302	156.965	166.07	90.3529	100.487	104.751	75.2839	63.2124	68.1819	594.093	494.039	367.599	85.3285	107.224	110.584	107.756	119.851	116.997	115.995	102.703	96.9281	182.541	183.994	180.237	0.00365894	0.462019
FBgn0041147	ida	30.1809	28.2404	19.9254	9.83824	9.84264	12.0757	7.64947	5.4081	6.59151	10.1984	7.6812	7.70873	20.9007	23.6883	24.0514	24.9268	22.7762	22.8373	22.4518	18.379	19.2646	43.9415	45.3037	39.6463	0.00366974	0.250796
FBgn0262559	Mdh2	786.459	557.133	803.826	428.902	447.123	501.146	191.115	257.267	193.307	2408.98	1891.31	1656.48	485.17	448.141	447.969	436.252	433.543	453.941	410.346	436.522	419.691	308.832	309.024	327.659	0.00367392	0.298819
FBgn0031217	CG11377	152.284	129.847	109.309	55.4149	48.7816	52.5011	38.9729	34.0465	0	84.5515	73.4483	83.4716	59.2925	62.9218	66.2366	63.9943	72.4225	62.9404	69.0885	62.7996	63.7008	114.151	116.945	103.915	0.0036845	0.18654
FBgn0085339	CG34310	131.817	58.6235	68.3349	104.182	132.082	52.3378	1054.59	1004.85	637.421	383.784	344.054	36.7309	18.9845	20.4476	20.2152	17.0613	17.732	19.9562	12.8823	15.8774	13.5867	20.8561	20.6443	19.8095	0.00368548	10.4217
FBgn0035471	Sc2	267.681	184.909	253.131	91.9871	92.5703	142.29	41.3402	69.8867	0	467.305	462.081	469.278	70.7586	80.6946	83.5848	80.5412	80.5943	82.4819	90.3954	74.2865	81.7597	141.93	151.217	148.798	0.00369976	0.157608
FBgn0038306	Art3	65.3096	65.1594	84.5044	34.331	36.6441	24.8583	24.405	33.7849	21.4655	429.138	449.54	478.33	45.7835	59.175	62.9299	53.8423	70.3235	68.7573	60.1452	55.1062	58.0503	68.9085	64.6329	67.4409	0.00370108	0.370536
FBgn0002887	mus201	31.7304	35.1818	28.7629	21.8876	23.2774	18.3819	15.6931	14.1967	7.16824	12.2907	13.1989	10.7543	25.8778	28.6891	29.3096	25.4925	28.4354	25.3143	23.1704	20.9336	20.8055	55.7181	47.911	42.6599	0.00371061	0.387332
FBgn0038519	Prx3	163.69	189.363	218.362	132.724	145.576	144.943	63.8359	96.2471	76.1167	1283.38	1274.2	1156.52	86.7158	96.7203	104.353	96.3629	107.711	109.4	118.513	105.757	105.525	176.7	155.546	180.996	0.00371637	0.413359
FBgn0001978	stc	111.856	117.615	134.702	71.7876	80.6038	80.4297	61.6327	36.7702	63.9581	85.4997	85.8218	100.146	80.4735	90.4649	92.2763	78.7244	86.3293	87.2429	90.1709	79.7852	78.7085	144.034	145.494	143.322	0.00371775	0.445835
FBgn0267791	HnRNP-K	341.564	518.531	391.542	150.878	95.7475	215.374	74.9179	114.483	74.6962	441.988	291.847	146.326	36.9198	41.2768	39.4353	25.389	27.2226	28.6995	20.0829	23.5593	21.611	40.0129	44.008	44.1868	0.00374043	0.211002
FBgn0261380	mRpL37	43.7483	37.8859	42.9766	15.172	28.1596	16.7099	6.05937	17.8339	0	6.23125	13.2857	9.16625	65.0667	66.5459	66.2108	73.6495	78.7633	74.9663	74.7982	76.19	71.9116	76.17	74.1002	69.7	0.00376612	0.191743
FBgn0000273	Pka-C1	79.1613	93.2544	75.582	38.1614	63.9538	67.1804	36.0095	43.9479	48.9025	136.759	140.579	136.591	39.8854	54.9446	55.3986	51.642	61.3483	59.7371	66.439	61.283	59.1307	111.84	121.003	116.6	0.00378373	0.519601
FBgn0031148	Cbs	151.017	142.367	135.868	93.4178	82.0544	89.2702	58.2536	76.7345	93.4722	583.277	511.544	501.389	90.2469	103.675	102.417	101.369	106.537	110.341	106.062	104.174	101.479	89.4235	105.227	107.665	0.00378391	0.532229
FBgn0033761	CG8778	101.976	110.11	134.194	66.9385	55.0477	67.448	19.7406	51.255	34.5642	77.7293	74.4615	67.5162	73.6137	66.6968	70.6854	78.9859	85.396	80.5101	82.1651	80.0502	84.6839	99.2848	109.67	104.488	0.00378665	0.304839
FBgn0032261	CG6094	96.3168	76.7867	106.325	56.4951	28.2336	33.4852	32.4759	33.5739	12.2769	51.4183	35.7124	41.1776	25.3817	27.3627	28.8804	27.9147	22.8609	25.6644	24.5258	24.8366	26.2464	41.2746	52.4047	49.705	0.00378832	0.28031
FBgn0086451	l(2)k09022	147.862	176.093	172.078	127.21	138.076	123.806	114.901	106.399	108.355	215.189	223.948	224.516	103.061	102.638	99.8687	71.493	76.574	70.454	69.8912	63.245	59.2982	98.6217	71.5916	75.3848	0.00379288	0.664583
FBgn0030245	CG1637	145.19	178.989	201.963	114.467	93.2144	92.3324	72.9854	64.8461	79.7442	1050.68	928.46	954.196	65.1458	78.4516	83.4157	98.6116	91.0872	91.2024	97.5949	84.9219	89.7017	109.429	96.0082	106.984	0.00379906	0.413531
FBgn0027528	goe	9.84695	7.60673	10.7654	1.10287	1.56289	5.9465	3.1524	1.37361	0	103.88	92.2688	96.0709	9.13696	9.15312	10.4119	8.75141	11.7945	10.3073	11.4941	10.7968	10.7809	20.5035	12.7889	16.3398	0.00380102	0.160388
FBgn0040534	Sf3b5	866.4	916.883	628.261	265.404	257.155	247.018	294.244	166.906	167.717	777.593	1121.26	1169.76	132.03	159.93	164.297	113.187	135.881	154.529	128.061	102.097	128.065	134.683	170.365	150.761	0.00381162	0.260773
FBgn0031639	mRpS2	148.556	117.587	164.611	96.0092	70.8203	87.5861	64.6931	55.0928	53.9997	80.2924	74.4841	76.6781	45.5511	57.1616	55.2338	66.0477	55.7065	67.0237	76.5022	61.2985	64.8361	74.718	77.3124	78.0751	0.00381921	0.403445
FBgn0033900	CysRS-m	15.7899	12.8774	9.87392	8.28847	5.84921	4.04138	1.07072	2.93255	0	10.8836	13.0129	14.4166	6.69143	11.6169	10.9672	10.615	8.98665	9.30243	9.25847	8.07464	8.61248	15.057	19.2808	17.1369	0.00382308	0.10387
FBgn0033520	Prx2540-1	26.2758	30.2799	43.9101	17.5341	25.3782	0	0	2.67189	0	34.9365	37.1221	111.125	5.49568	2.76632	4.50702	3.24067	3.73056	2.87973	2.14274	2.02607	1.77325	7.48293	6.77629	7.65459	0.00382582	0.026595
FBgn0052649	Coq8	57.171	55.5799	77.4677	40.9121	31.7769	34.8992	21.3835	18.1347	21.7574	66.5078	56.7223	47.3167	56.6472	48.089	47.1974	47.5672	42.018	42.1568	39.1329	41.1118	37.3604	38.4678	42.2979	41.7425	0.00383413	0.322133
FBgn0031483	CG9641	66.7458	86.206	89.7138	44.9794	27.2485	39.6222	17.1554	22.0784	36.647	133.921	115.92	139.599	91.5543	109.023	119.416	117.064	129.612	123.405	126.002	115.428	114.197	189.099	199.661	190.378	0.0038345	0.312697
FBgn0036772	CG5290	78.3348	78.1895	65.4529	48.6208	39.8109	34.6754	36.9569	24.6687	12.8361	11.4907	12.759	8.50715	30.7802	30.0474	28.9879	23.7415	23.2253	21.7034	20.7513	15.4159	16.8731	34.5645	35.7506	33.3323	0.00383604	0.335448
FBgn0004860	ph-d	20.3027	22.6923	17.0092	15.4593	20.0158	13.5101	7.95189	6.91242	10.309	60.7315	67.931	74.0817	11.2921	14.5247	15.4961	15.5212	15.1813	17.2991	16.7312	14.8133	14.6477	39.0235	39.4296	37.1902	0.00384335	0.419526
FBgn0039868	CG11563	83.3277	95.5667	76.5228	0	58.3757	73.9511	23.2393	44.3222	21.4284	432.157	441.644	607.619	79.2597	76.7359	81.7173	85.1223	98.3884	85.4992	108.073	88.3297	91.3589	115.869	117.697	118.376	0.00384512	0.34841
FBgn0011230	poe	132.449	180.931	127.821	88.6029	87.2347	79.9485	45.6246	45.7235	42.9662	189.622	186.56	132.305	135.313	158.565	151.294	66.6032	66.1441	64.8033	34.9843	33.6703	32.4675	175.142	123.125	120.445	0.00384889	0.304429
FBgn0032189	Ripalpha	333.885	428.42	316.451	259.938	210.451	227.582	137.05	153.426	100.684	1111.71	1345.24	1328.36	110.296	124.296	125.868	138.527	135.113	133.709	157.396	141.687	142.945	199.094	165.148	186.891	0.00385119	0.362603
FBgn0022724	Taf8	52.8088	65.6396	42.0362	33.8351	21.2621	28.4833	4.64801	13.5136	0	179.981	224.994	248.824	25.3163	38.6095	42.5694	48.6336	48.5573	47.9169	47.0343	41.9924	46.1881	70.0503	84.9102	82.0044	0.00385284	0.113167
FBgn0032361	CG6488	26.9734	28.527	20.347	17.3264	15.2899	14.7725	8.15041	9.92236	10.65	12.8395	11.9973	17.5181	8.12333	9.68637	11.4813	10.352	8.17449	12.348	11.7392	8.50938	8.60035	16.8921	18.6833	16.4456	0.00386968	0.378691
FBgn0035251	Vta1	46.2915	48.5462	57.3301	15.0514	23.4676	27.0585	25.569	20.6911	29.5876	404.856	464.923	430.177	24.5439	40.8578	41.2744	46.8825	48.4983	51.7909	52.3316	45.509	49.4679	74.2746	70.7251	77.2297	0.00387336	0.498448
FBgn0034986	mRpS17	135.396	193.618	177.286	85.0136	59.8406	54.7665	43.3969	63.9577	24.0444	361.218	375.817	382.618	62.8032	71.5344	76.415	82.4697	86.2939	81.6726	95.4147	86.3595	93.3426	97.8373	107.612	103.027	0.00387638	0.259528
FBgn0034186	CG8950	23.6411	19.1218	24.7188	31.9	12.5407	16.2488	5.47089	8.31867	0	60.0671	58.587	54.4192	14.4663	22.0883	23.0852	19.1637	19.4849	17.6474	18.7673	17.6065	14.6598	37.5811	39.1771	37.3795	0.00388232	0.204345
FBgn0031492	CG3542	68.4974	75.6405	78.9057	51.7023	63.2336	57.7773	47.3531	39.0053	29.7236	177.369	158.627	167.009	37.6688	48.7927	48.1928	46.5704	48.4033	43.2267	43.9324	41.8666	42.0706	72.6068	62.8732	61.1577	0.00389442	0.520446
FBgn0037342	CG2931	202.818	218.251	276.805	96.8355	80.1722	103.314	104.272	90.3767	88.5047	158.398	158.867	172.474	40.3442	41.3639	41.3163	35.0395	32.0077	35.7959	36.3313	38.725	34.3945	41.6806	60.0884	54.8748	0.00390551	0.405737
FBgn0053105	p24-2	177.748	114.893	144.741	99.9472	92.7744	97.1254	30.9662	42.7938	26.9406	412.587	338.379	672.177	97.0418	97.1826	94.2883	95.1505	107.469	90.9661	102.419	109.449	105.904	94.615	84.7447	87.553	0.00392904	0.230235
FBgn0003475	spir	92.9036	93.7803	106.209	72.9675	76.8424	100.73	59.185	50.2579	34.9466	240.066	214.484	262.81	43.8713	45.5892	42.7765	41.8392	47.9629	49.2753	48.8626	44.095	41.8758	92.5604	85.7487	86.3301	0.00393339	0.492977
FBgn0016034	mael	101.495	93.9766	68.0953	36.6551	35.2094	31.8321	7.75915	28.679	15.4161	241.714	233.273	274.235	36.8954	44.7153	48.661	54.8041	57.9087	52.2647	63.8931	51.9632	49.9611	87.3206	97.6111	96.1139	0.00395123	0.19674
FBgn0030805	wus	187.254	191.46	248.036	121.303	130.672	140.427	93.7234	92.5238	77.9415	665.328	566.779	492.548	52.9827	62.0567	60.7905	63.0275	66.9816	62.79	60.5627	61.3855	61.2649	86.3041	92.9977	87.6235	0.00395414	0.421522
FBgn0010825	Gug	84.1197	95.5652	88.787	49.5941	56.2204	53.5155	43.6109	31.9955	55.8849	458.029	409.262	401.596	37.2194	39.5655	40.5398	30.5074	32.3983	34.3457	33.6566	30.6095	30.1056	90.5649	85.6337	84.5406	0.00396874	0.489777
FBgn0034401	MetRS	262.811	234.534	300.949	208.03	199.056	188.877	156.601	128.697	124.288	109.858	99.8164	78.4753	133.16	128.432	124.862	121.539	128.223	120.833	115.285	109.907	105.656	130.584	118.761	114.233	0.00397879	0.513077
FBgn0069242	eca	221.401	143.205	185.133	116.885	122.909	126.401	42.1814	55.2917	36.5112	590.649	472.147	839.775	142.594	151.568	145.011	145.719	163.114	139.949	160.683	158.189	158.153	146.417	134.486	136.899	0.00398803	0.243724
FBgn0017572	Mo25	81.5448	70.7543	99.4254	51.8314	57.4317	68.8382	36.7674	30.9303	30.7893	480.106	466.703	446.024	35.8474	40.9964	39.7151	43.1087	43.8998	48.6805	66.0055	49.8956	49.3428	72.5168	70.5386	75.5285	0.00401141	0.391249
FBgn0010774	Ref1	318.932	348.259	369.109	241.146	268.594	250.806	191.033	221.79	144.062	4846.66	4601.55	5143.98	196.897	247.542	246.784	294.004	335.797	338.557	356.301	317.897	322.632	503.449	484.958	510.811	0.00401578	0.537378
FBgn0030503	Tango2	7.61282	13.9703	11.2624	10.5437	3.26849	7.92361	0	0	0	153.748	125.495	170.212	9.33899	12.3282	12.5468	14.9239	13.3924	11.6876	22.3553	17.4953	12.9767	20.7894	23.9331	24.1211	0.00401828	0
FBgn0003462	Sod1	1615.54	1101.75	1462.67	766.67	654.955	786.308	436.999	515.339	482.247	3221.24	2864.03	2999.99	443.09	453.066	466.351	484.321	490.217	504.247	527.818	528.919	498.888	502.85	550.081	580.263	0.00402227	0.343206
FBgn0027495	Smyd4-4	98.6919	106.975	130.241	75.6218	67.0854	74.9448	46.8487	50.3136	58.8569	700.294	730.838	744.96	45.2767	49.6578	51.2669	60.2427	59.4186	60.9002	70.4729	66.6916	62.2717	93.2931	82.2074	87.5955	0.00402875	0.46447
FBgn0030373	moon	36.7186	42.7574	55.0163	26.8306	28.591	17.8403	10.9597	10.6221	1.12993	270.145	318.565	271.902	114.455	102.244	100.668	127.624	116.498	127.708	121.504	119.051	130.193	79.1807	90.782	90.9006	0.00402954	0.16887
FBgn0262125	Sec23	361.76	303.993	401.48	174.712	168.136	169.499	181.502	143.479	185.047	335.612	304.45	276.775	132.279	131.247	129.051	103.52	103.629	104.089	105.762	97.0953	100.175	114.488	109.881	117.486	0.00403051	0.477897
FBgn0014189	Hel25E	600.279	491.179	649.893	267.154	331.231	298.483	291.428	312.232	260.244	4873.12	4648.13	4327.33	479.783	540.655	548.166	657.193	675.306	707.038	689.124	684.898	648.892	635.372	550.636	600.562	0.00403163	0.496111
FBgn0259113	DNApol-alpha180	67.879	88.5957	70.8607	39.2119	39.0528	32.9084	38.5524	27.263	32.5679	56.7741	58.6052	47.6621	47.1145	59.0037	57.3125	47.2947	52.8166	51.7629	50.401	43.1982	40.8381	114.209	103.557	90.4419	0.00403935	0.432767
FBgn0264694	mgr	112.393	99.2927	130.712	45.1295	34.4147	80.0254	27.6639	51.3869	15.5572	306.537	260.585	199.151	151.506	169.974	173.979	182.224	166.699	184.067	188.661	172.799	182.278	233.04	237.502	202.855	0.00404317	0.27631
FBgn0026147	TTLL4A	84.9301	88.7505	69.3078	63.6212	61.7116	63.1377	34.2903	39.9028	20.1637	51.2737	62.3449	44.4372	70.9093	82.6276	84.6018	81.6325	84.4414	87.1025	84.2878	74.5435	72.5531	182.64	157.538	155.57	0.00405841	0.388318
FBgn0032988	Tif-IA	250.821	350.407	239.863	153.278	111.548	120.733	14.0774	76.1715	0	164.161	229.553	240.768	168.218	195.341	193.792	162.754	161.141	155.616	158.909	136.282	136.839	298.686	259.953	241.865	0.00406445	0.1073
FBgn0039349	Ssadh	94.2793	70.2142	69.4117	46.2453	29.0702	25.649	20.1567	31.7427	25.4023	15.7252	18.7081	15.046	29.7516	34.5929	33.388	32.7217	35.6418	39.2762	45.7449	31.5489	33.7871	56.019	56.5894	54.0007	0.00408113	0.330483
FBgn0028984	Spn88Ea	242.057	190.355	178.837	149.723	119.45	129.211	72.0774	94.7226	65.5676	590.675	544.239	510.045	87.8	86.8557	86.7404	82.6797	77.4753	87.615	81.1775	81.1121	80.8763	86.0679	76.9586	82.2816	0.00409229	0.380152
FBgn0032105	borr	204.022	216.629	183.072	129.621	115.107	142.955	74.0041	123.447	80.0152	2628.99	2402.73	2620.84	92.4983	125.158	131.987	158.83	178.072	174.148	189.325	178.435	179.854	342.507	316.534	329.883	0.00409836	0.459592
FBgn0025790	TBPH	32.5617	42.3882	26.9257	13.9017	8.33831	12.0581	5.04378	7.55453	0	43.785	70.5955	51.2862	11.663	18.2303	17.3473	17.6273	18.9937	19.0372	19.1421	17.8901	17.0274	32.6598	36.0402	35.3175	0.00410074	0.123664
FBgn0035713	velo	25.4503	23.9603	23.1297	14.1198	14.5217	16.4725	14.9033	10.9206	7.65261	105.188	104.527	181.017	50.4464	49.6443	50.706	52.768	53.3716	55.9677	51.622	47.603	44.5889	88.3592	89.872	87.064	0.00410611	0.461489
FBgn0260049	flr	246.899	213.553	241.5	227.724	215.907	182.077	155.531	134.948	166.368	184.916	142.719	156.825	169.82	194.326	189.57	203.033	212.462	208.842	197.523	202.337	203.026	220.748	240.01	228.058	0.00412639	0.650824
FBgn0032923	CG9248	141.511	105.002	100.685	58.9742	61.9781	57.771	37.5338	42.3581	34.875	425.178	386.075	334.53	46.456	49.9346	50.1942	52.1544	53.5556	48.8979	51.2349	47.5186	47.0671	65.1615	62.7493	66.0098	0.0041305	0.330552
FBgn0040529	COX7A	650.69	742.098	893.895	301.221	270.538	282.565	210.186	209.565	353.37	2412.62	2422.15	1980.23	158.401	155.021	142.2	171.214	151.132	162.539	171.935	168.897	171.247	186.761	211.378	193.991	0.004135	0.338097
FBgn0003514	sqh	98.7215	113.963	140.761	75.3899	55.519	40.7276	29.6596	37.7087	48.4592	883.535	1069.27	918.907	84.4124	92.3467	89.7677	124.614	118.805	113.044	133.001	128.353	133.943	144.222	144.505	151.62	0.00414646	0.32771
FBgn0029522	CG13373	162.491	180.607	153.071	47.1166	101.543	84.5371	30.8058	77.1926	10.2696	206.127	141.423	426.233	83.5767	101.875	105.256	137.48	128.881	131.985	136.531	143.311	141.309	203.943	183.686	191.854	0.00414929	0.238362
FBgn0053810	His1:CG33810	8.65483	11.6492	6.88706	3.70793	2.15338	1.06966	0.796706	1.12947	0	1.31225	2.27002	26.8015	75.0662	101.849	111.5	115.505	126.597	124.307	148.223	136.78	138.278	192.444	217.5	225.617	0.00415274	0.0708384
FBgn0045862	btz	203.494	171.433	203.946	139.31	163.089	147.729	114.397	109.736	131.498	465.997	430.493	398.686	42.7198	64.4249	70.4583	70.0312	78.3341	79.7191	73.9224	63.6104	63.9453	96.6485	101.671	98.1386	0.00415431	0.614352
FBgn0033740	dgt5	73.6983	76.2384	73.053	36.3682	49.2187	53.8047	44.8702	43.9152	26.319	49.2081	51.6996	40.0653	39.8743	44.614	44.9681	41.9541	47.1366	44.4339	44.1153	44.3741	40.963	84.6453	78.0009	72.8172	0.00416241	0.516187
FBgn0260779	GatA	23.3768	16.5887	21.4204	9.89941	9.69765	9.68687	6.10353	5.62922	0	28.8806	46.157	38.1758	22.0352	23.966	27.3646	28.0302	27.4718	28.9559	25.5801	27.325	26.9408	34.308	29.4564	29.9225	0.00416977	0.191131
FBgn0032640	Sgt	248.952	288.247	347.349	143.358	108.017	144.094	125.167	124.888	129.208	858.111	797.064	848.911	114.979	120.865	125.821	125.16	124.583	126.492	133.426	120.301	129.947	166.683	161.007	167.274	0.00417281	0.428765
FBgn0034629	Acox57D-d	63.602	50.7971	53.8349	34.5158	31.1236	35.3146	14.82	14.4789	29.2643	29.0552	32.711	24.1091	37.5901	40.5869	41.2689	43.7256	48.0341	47.3683	50.9368	47.0135	42.2762	63.1608	69.8331	67.117	0.00418256	0.348106
FBgn0031229	CG3436	155.609	202.829	170.955	92.589	76.2042	116.898	58.2731	78.2962	25.0069	165.587	197.463	187.814	88.7832	107.184	112.429	114.884	113.061	105.198	110.936	100.726	102.082	161.891	163.742	153.497	0.00418302	0.30521
FBgn0037894	Ranbp9	90.0688	122.719	109.706	63.9717	73.1843	67.2912	45.8787	54.9956	44.0891	767.587	784.435	748.975	62.5305	77.575	78.6924	87.076	93.8157	88.8996	102.168	90.0898	80.7648	145.809	132.241	134.355	0.00419358	0.449508
FBgn0001970	Pgant35A	72.3594	57.211	78.3511	41.0478	31.5536	27.972	31.3918	30.1399	20.766	40.1728	39.0286	43.968	47.9751	53.9097	53.481	50.9525	53.337	52.7556	52.6886	47.2868	51.7895	55.9276	52.4712	55.0149	0.00419489	0.395812
FBgn0037656	CG11986	65.671	54.068	37.4671	11.2701	20.449	22.6844	2.46327	5.80649	3.72789	65.8853	55.9826	77.969	27.124	32.3409	30.2059	37.0914	34.9007	37.6972	40.9271	35.4318	34.7395	42.4684	46.8217	47.398	0.0041996	0.076318
FBgn0052654	Sec16	29.4282	38.1192	32.0046	21.2575	32.1719	27.7826	18.3638	18.0848	17.4664	127.99	131.505	122.183	17.1896	21.6427	22.3302	24.8199	29.4383	30.0949	33.1426	28.1356	29.3097	124.812	116.343	106.615	0.00420241	0.541575
FBgn0013675	mt:CoII	5442.85	5878.96	3282.08	529.646	290.637	346.394	177.252	193.009	111.752	547.426	1244.74	1045.34	5567.52	5849.11	5735.77	2540.92	2608.8	2271.21	1799.52	1946.2	1642.32	3649.98	2989.02	2944.74	0.00423215	0.0330057
FBgn0023167	SmD3	526.311	388.513	634.886	216.275	239.792	300.501	97.5689	97.6494	101.066	547.516	569.152	653.448	34.7821	59.7014	70.8966	62.2948	75.2443	73.9667	88.8904	69.9666	67.791	67.7237	108.172	114.946	0.00423256	0.191187
FBgn0046222	Wdr33	23.1317	16.7631	15.0201	4.84261	20.786	10.8733	4.37822	3.50419	1.98326	59.7182	69.402	68.1746	32.8416	42.1711	42.7308	53.3964	57.0587	55.75	60.422	51.5737	54.0109	90.2004	106.939	98.5407	0.00423343	0.179654
FBgn0010750	atms	111.409	93.3653	135.729	80.5465	95.3101	60.0524	41.6442	40.3695	42.52	279.572	255.791	258.772	89.3752	101.513	97.8828	102.343	99.815	101.012	97.9093	91.9228	90.8806	106.909	104.692	109.496	0.00423889	0.365734
FBgn0037121	Rpb8	151.827	130.555	114.815	59.9907	59.3726	53.1341	33.2534	55.3377	9.51402	250.19	260.349	299.378	54.1735	57.4778	63.4474	60.073	61.0282	70.091	70.7719	62.8596	60.858	87.6449	90.8435	84.6277	0.00424931	0.246993
FBgn0038251	Hexim	142.113	201.044	150.176	47.2651	55.0553	59.8897	61.6321	33.8354	44.1409	184.328	145.98	188.524	56.8964	59.1606	63.3634	51.014	59.5214	53.2579	66.5428	54.5781	56.6832	120.025	123.353	119.891	0.00425722	0.28299
FBgn0030973	CG7332	299.499	248.308	363.21	131.758	173.385	151.843	111.108	103.256	111.442	143.205	126.786	136.644	101.762	107.103	106.734	103.876	101.434	98.8068	99.7474	98.7197	95.1322	129.954	118.531	125.442	0.00425787	0.357629
FBgn0039488	CG6066	76.5215	110.794	84.4593	30.2727	49.0431	47.7841	32.1043	29.4234	26.4446	132.352	130.701	139.215	47.5519	50.2227	48.8787	46.3344	43.6943	39.8509	45.6511	36.0003	44.2299	64.5025	64.9834	60.7566	0.00427856	0.323695
FBgn0052441	CG32441	195.712	231.628	292.533	107.432	119.758	145.234	76.8714	71.5262	43.0091	681.248	724.139	769.239	99.4757	90.0932	93.6278	97.5808	84.8106	101.371	99.7378	92.7411	96.6585	131.895	96.879	118.448	0.00427869	0.26589
FBgn0029849	Efr	44.708	36.1503	32.2439	23.0078	15.0147	20.3407	16.183	6.86027	8.67156	22.3819	16.5504	20.9196	13.3343	20.8372	21.2685	24.7938	27.3258	23.9817	27.6315	23.3998	24.941	55.6425	48.453	50.9411	0.00432682	0.280409
FBgn0062442	Cisd2	550.289	363.299	572.164	191.638	331.852	276.679	123.224	0	0	1185.8	1211.76	1405.88	155.053	175.092	183.114	184.406	181.728	206.472	217.574	196.753	204.166	209.829	218.64	225.437	0.00432689	0.0829372
FBgn0030720	CG8939	86.9461	126.765	123.141	61.8993	61.8302	61.878	41.6451	35.346	34.3105	295.958	280.635	270.617	47.7982	53.0032	53.92	33.9032	39.9641	33.7674	31.5813	29.4505	28.705	57.5589	55.2648	53.6733	0.00433852	0.330417
FBgn0035960	CG4942	24.689	20.2988	16.0502	11.2202	9.12421	15.0867	2.61191	5.83878	0	39.6665	53.6844	48.0566	6.75066	12.9333	13.2086	12.1513	14.5193	13.1756	10.0313	10.7445	11.3313	21.0288	22.5879	22.0998	0.00433964	0.13845
FBgn0022097	Vha36-1	256.058	198.654	218.594	87.9281	96.911	113.819	62.1826	98.6637	114.322	1372.53	1217.33	1084.43	130.904	148.86	155.061	186.449	196.593	195.407	219.257	204.125	213.584	244.798	222.653	241.831	0.00436655	0.408682
FBgn0263977	Tim17b	389.497	517.806	375.882	195.369	183.65	219.108	90.3199	137.402	0	257.686	468.62	575.545	200.517	245.919	253.798	269.168	271.572	242.898	264.512	235.9	250.704	381.128	359.073	331.703	0.0043722	0.177466
FBgn0030519	CG11151	76.7054	51.2188	95.4605	0	0	37.0829	0	0	0	264.742	271.412	297.976	69.5161	85.8317	81.6884	107.843	122.51	127.744	159.467	113.556	138.045	156.805	215.383	196.662	0.00437281	0
FBgn0040512	zetaCOP	209.412	135.802	227.146	38.1874	99.4168	59.7671	18.1155	35.426	0	802.39	946.809	862.666	126.107	129.928	147.78	147.006	133.445	145.405	128.114	141.598	135.22	129.284	121.605	126.385	0.00437289	0.0935453
FBgn0052418	vito	60.9833	87.6604	93.81	35.6497	16.1084	15.6502	20.4849	20.3702	5.28303	132.845	126.637	156.626	32.0538	35.6114	37.617	31.5412	32.4867	35.146	37.1735	30.1338	32.2649	43.9884	47.5728	49.0798	0.00437544	0.190296
FBgn0262714	Sap130	32.1324	43.3205	43.3623	25.1986	24.0937	19.363	18.4048	17.262	13.8488	97.9395	93.9364	107.353	16.0289	30.8101	31.4142	27.2733	33.279	31.861	34.441	30.3007	31.4063	88.7363	81.9194	77.0918	0.00438002	0.416744
FBgn0030136	RpS28b	1717.87	1216.96	1613.05	609.775	578.999	812.39	449.438	472.698	679.598	3572.82	3425.94	3013.35	6602.46	6028.74	5727.56	5803.59	5851.37	5558.9	5927.85	6137.56	6290.16	2064.02	2271.49	2125.25	0.00438035	0.352193
FBgn0038964	Nop56	444.049	350.083	502.338	289.736	280.35	301.228	178.569	177.992	148.191	724.588	764.796	734.014	237.058	235.216	244.976	239.272	242.99	240.174	225.585	207.431	209.604	266.391	259.726	266.457	0.00438471	0.389328
FBgn0261790	SmE	379.442	436.117	418.205	283.394	239.05	277.388	182.02	273.289	234.116	1880.78	2497.91	2082.72	347.507	323.568	328.269	383.705	391.061	413.727	463.441	421.631	404.048	380.34	376.527	390.89	0.00439364	0.558798
FBgn0030365	Tango4	42.81	36.1708	33.7208	20.8877	23.8922	20.2014	19.5761	19.8587	22.8169	654.416	526.712	543.229	40.9463	46.4925	50.4366	61.9872	59.6552	63.0108	65.5459	56.6834	62.1663	78.8041	77.2261	79.2594	0.00443215	0.552358
FBgn0086443	AsnRS	352.852	320.689	431.687	219.146	256.763	205.216	145.431	157.873	188.547	191.288	165.879	117.851	177.334	125.037	161.842	150.853	147.438	150.766	152.898	135.241	135.637	147.7	148.614	141.895	0.00445093	0.445022
FBgn0026317	Tsc1	39.7854	51.1487	48.7478	26.0533	28.3906	24.7328	16.8711	26.264	19.1956	368.224	309.261	287.383	24.1572	29.6645	28.4895	27.8812	33.6648	31.6424	34.0381	33.3963	30.4153	47.2192	51.3704	51.4814	0.0044643	0.446233
FBgn0037707	RnpS1	340.058	271.597	323.544	209.334	208.205	189.6	180.212	127.968	106.543	664.573	585.11	634.893	82.8055	85.761	89.2533	77.3407	82.0249	84.4943	82.7135	90.6177	79.4508	99.9391	112.864	106.325	0.00447847	0.443459
FBgn0036570	IntS9	71.3184	62.8485	85.888	38.5041	36.0179	41.2916	19.4363	26.5025	34.8034	174.574	186.83	158.66	33.3024	36.5429	36.0704	35.2577	34.2494	32.696	34.9511	31.1124	26.88	35.3311	34.4291	36.9328	0.0045059	0.366919
FBgn0014020	Rho1	492.582	381.885	453.051	258.503	221.856	258.543	197.918	174.755	68.7662	1165.75	1460.81	1646.69	103.256	124.032	124.191	120.399	130.278	151.527	143.736	148.291	144.164	250.869	253.44	258.273	0.00450725	0.33253
FBgn0034368	zda	116.6	145.92	141.864	66.4184	64.9107	54.2924	62.641	53.2632	21.5397	482.857	543.995	488.866	52.4731	61.7578	71.5956	66.2007	75.8947	70.4562	67.1982	70.1129	67.8776	133.619	123.045	110.195	0.00451165	0.339885
FBgn0020655	ArfGAP1	166.606	209.429	257.14	110.195	136.228	120.869	54.2781	65.6811	57.9914	210.041	175.413	203.976	90.3941	92.7436	93.8492	93.8876	92.659	87.9493	81.9753	85.9661	83.8013	100.019	110.597	115.013	0.00451823	0.281045
FBgn0039189	CG18528	8.25334	14.2024	11.3993	4.64967	4.3485	3.7329	0	2.01407	0	15.6329	20.3032	14.5641	18.7811	24.5067	24.155	27.7315	28.8874	28.5435	32.5438	25.0329	27.0503	40.5392	43.5306	40.3996	0.00452588	0.0594913
FBgn0032929	Mcm10	204.162	265.099	191.465	111.47	112.894	127.721	92.1112	72.1157	89.6453	354.318	387.908	381.178	110.951	123.162	121.756	107.678	112.812	109.691	101.011	91.3063	92.5408	189.604	163.207	164.438	0.00453258	0.384232
FBgn0035145	MED14	52.8991	57.683	45.9639	44.5294	37.7434	42.2687	33.5725	29.6284	31.4734	168.217	168.982	141.711	32.9055	44.4976	45.119	44.8308	47.0904	48.6684	45.5744	42.7096	43.3117	85.2355	75.9334	75.6344	0.0045397	0.60477
FBgn0050496	CG30496	42.2127	43.011	42.9492	28.5452	25.2173	37.7201	25.5983	13.998	24.5567	32.7224	33.7944	31.1443	17.5284	20.7421	19.037	16.9958	17.0652	16.6609	17.2034	17.928	16.9232	25.612	26.0044	23.5188	0.00454845	0.500519
FBgn0020249	stck	36.6833	43.9114	41.4411	14.712	15.2375	21.1068	0	17.1424	0	230.934	233.664	179.472	56.3695	74.0256	68.8176	87.51	84.1013	79.8998	102.543	86.5572	94.3957	109.625	109.791	112.772	0.00457443	0.14047
FBgn0010391	Gtp-bp	127.563	89.4147	130.268	62.7765	61.5369	63.572	44.0055	33.8568	36.7542	77.9742	60.6225	34.6677	76.1347	74.3594	77.1322	74.7511	83.2697	77.131	77.5705	71.8318	71.639	95.4135	101.178	96.2905	0.004591	0.330073
FBgn0004655	wapl	52.0467	45.0242	59.432	32.2959	38.3082	29.7166	24.5306	26.609	29.5884	252.427	362.989	352.353	52.2464	58.0817	58.5192	63.5655	71.2932	73.2753	89.4513	71.5316	71.9899	248.191	228.943	194.791	0.00460426	0.515825
FBgn0005654	Orc3	91.3285	69.4823	106.773	40.0846	48.32	40.9118	29.0884	25.3618	16.4109	73.838	68.49	66.6	66.3681	62.854	62.9822	60.0378	62.7998	59.8355	65.9146	57.6201	57.3948	84.0712	81.4001	78.8257	0.00460651	0.264818
FBgn0000617	e(y)1	181.593	134.194	189.847	111.589	83.285	99.341	49.5038	73.4628	62.0134	230.848	275.904	254.446	26.6611	29.5167	32.3785	29.7043	25.86	29.1536	27.7045	23.2693	24.9482	33.507	40.8254	41.4307	0.0046074	0.365838
FBgn0037687	CG8132	33.9139	37.7674	49.8885	16.0572	11.7186	12.3085	10.0825	10.3012	0	84.2516	93.7141	105.395	39.6984	35.0697	37.9326	46.9085	42.3286	37.2878	33.8001	38.7916	39.4932	43.7717	42.7336	41.4655	0.00460801	0.167671
FBgn0028895	CG17328	49.511	33.0327	46.0582	14.3771	20.2125	19.735	9.75223	10.1938	15.9441	16.4063	16.2081	13.7701	14.3393	23.5159	20.1024	21.483	22.2691	18.6523	25.5722	20.2005	20.6938	51.2049	45.5578	43.5971	0.00461132	0.27908
FBgn0250755	CG42233	19.1532	22.3534	26.978	32.3427	23.036	22.4165	10.0611	9.84456	8.00679	63.491	52.9562	39.9152	9.20713	12.2876	13.0659	14.4692	15.4939	16.3328	11.6972	14.8089	14.1269	22.1479	22.5312	21.4429	0.00461238	0.407572
FBgn0039969	Fis1	220.111	274.718	211.402	0	0	108.743	0	89.8445	0	334.062	1192.54	943.328	91.1298	90.364	98.9986	96.9431	114.267	99.9822	104.644	109.544	98.9801	178.333	180.213	166.914	0.00461759	0.127217
FBgn0015269	Nf1	28.1311	43.1691	43.3238	16.769	15.2427	14.9106	10.8671	7.53808	7.93672	76.2935	77.6521	79.8315	28.9323	32.5203	31.0988	15.0077	13.5603	13.5294	9.73764	9.53404	9.04151	46.2781	34.9094	33.7745	0.0046296	0.229812
FBgn0031651	mRpL24	94.7841	66.2407	69.6088	32.1232	36.1434	30.9439	5.33816	25.9851	13.9315	62.763	66.1907	59.3903	54.9614	71.5245	68.0788	77.9431	76.5784	78.3396	73.1941	65.836	69.3979	84.1447	96.8469	89.0234	0.00464102	0.196219
FBgn0001086	fzy	1041.42	1021.12	1249.25	819.671	808.655	899.626	678.528	528.819	639.975	3179.22	2871	2891.3	185.322	208.672	189.961	194.963	179.874	174.358	177.096	163.903	162.182	229.54	192.481	200.149	0.00467421	0.557802
FBgn0039250	Mink	173.29	201.263	127.007	90.6559	70.3613	73.5944	49.4749	39.7551	32.0525	110.557	133.84	133.381	58.1071	60.4549	62.0029	37.2994	37.7807	36.1231	31.9487	23.4569	29.9523	77.0197	70.1048	68.2027	0.00467614	0.241811
FBgn0029715	CG11444	345.901	279.233	272.022	189.987	157.342	154.241	163.617	106.295	135.378	1255.46	1203.05	1172.49	229.451	226.157	245.898	268.318	260.332	259.31	301.749	271.04	252.598	273.65	286.801	292.779	0.00467666	0.45175
FBgn0033971	CG10209	47.9188	61.5253	46.572	25.817	18.0619	17.4374	24.8195	12.7845	14.5814	26.9272	15.475	22.7734	39.8715	43.4105	42.1001	30.5446	30.3815	32.8876	26.621	22.7285	24.6714	53.0194	54.4627	54.2629	0.00467917	0.334487
FBgn0037301	Mms19	38.4556	26.172	26.1119	26.6196	17.9385	26.7063	7.2182	7.198	5.20943	40.9094	54.2132	50.4094	30.9399	36.8865	39.1427	36.2167	35.1673	35.3943	30.1102	29.2772	29.0304	70.6264	56.0907	57.6505	0.00468009	0.216285
FBgn0037382	Hpr1	49.5517	59.934	41.7739	40.2631	48.1202	34.9098	16.0466	20.4834	20.9236	226.479	202.08	191.576	36.1216	37.8001	36.7477	37.4996	41.1615	39.9172	28.9316	32.9828	32.8401	45.7954	46.0701	42.6533	0.00468273	0.379834
FBgn0030089	AP-1gamma	97.6196	124.188	113.699	82.7379	96.6586	99.9745	68.7814	58.8259	66.2763	462.95	410.296	397.47	45.3378	58.0995	56.8035	66.6842	72.5238	71.9593	78.4651	65.9007	69.8932	136.601	124.729	114.91	0.00468643	0.577882
FBgn0025700	CG5885	311.257	280.535	208.982	105.198	144.164	181.594	65.5466	78.3895	104.033	451.248	377.583	330.039	91.0061	111.351	118.237	111.207	129.412	134.197	129.328	120.593	125.776	176.143	182.017	184.317	0.00468898	0.309662
FBgn0039654	Brd8	51.6841	45.7591	63.1839	24.4927	29.0104	28.3872	20.0703	23.1016	11.3535	150.298	137.906	125.195	24.4331	24.5901	26.3487	21.3756	24.2767	21.0173	21.6505	19.4983	21.4003	41.3953	34.7618	36.476	0.00469622	0.339454
FBgn0260962	pic	62.0752	62.5995	47.8952	22.5792	30.4404	29.863	24.3879	24.4924	10.8606	591.32	617.267	603.791	57.4948	74.3356	76.3921	83.9817	90.2923	86.4056	92.6241	77.4958	74.3661	162.763	135.581	132.875	0.00471153	0.346184
FBgn0283469	Vps4	148.649	124.164	183.065	77.4955	67.3098	87.1779	46.8903	59.2525	35.3828	159.722	114.976	132.656	84.5609	79.7676	85.123	76.5448	77.7686	83.3838	77.9672	70.2883	76.0695	97.5361	108.114	107.83	0.00471732	0.310446
FBgn0052783	Gem4c	18.5021	11.924	18.6276	21.5709	6.12807	12.8235	3.58631	2.46471	4.27084	22.6041	24.9672	75.9885	5.87997	10.263	10.8767	12.9589	14.735	12.9872	14.139	12.5406	12.6845	43.4725	36.8518	36.5266	0.00476204	0.21042
FBgn0027868	Nup107	99.687	85.1245	115.719	71.7748	66.4917	66.9616	51.7242	41.2966	48.4075	279.356	236.213	178.011	98.0388	97.669	93.8573	87.4621	85.4514	85.3849	90.8715	77.8188	82.8695	87.4092	85.9385	86.3864	0.00477579	0.470596
FBgn0086687	Desat1	415.233	366.472	516.652	296.288	226.273	281.949	174.503	193.287	170.365	139.981	139.771	143.46	188.744	249.335	262.119	277.324	273.39	281.574	288.523	263.736	276.07	426.777	459.762	468.974	0.00481113	0.414489
FBgn0004861	ph-p	7.35623	6.6239	9.76929	8.1027	6.48148	7.00218	2.05501	2.82195	1.52167	22.5847	24.8845	34.6012	5.74208	6.33639	6.63791	6.70784	6.24633	7.42622	7.20183	7.04261	7.48228	15.41	12.089	11.6648	0.00481286	0.269422
FBgn0034914	CG5554	241.11	288.532	336.732	140.651	165.036	197.614	61.4311	110.48	124.599	1729.66	1403.91	1320.29	132.91	140.649	145.761	153.382	158.831	163.681	152.539	143.404	145.571	155.093	157.431	176.394	0.00481888	0.342243
FBgn0037541	CG2747	74.3512	86.7623	69.7139	51.0423	48.9524	46.2513	48.9717	40.9478	37.8125	196.374	98.6612	158.092	57.2531	66.7031	66.3547	45.4329	48.1014	44.3315	44.6552	40.6983	38.8586	92.1239	70.4374	71.8378	0.00482108	0.553366
FBgn0013765	cnn	149.562	201.147	141.439	80.2087	82.4204	86.8072	62.9484	55.1046	44.5091	390.074	382.972	361.121	61.0539	78.3641	76.9707	59.1711	64.8538	63.5165	62.8331	52.3593	50.3971	128.407	114.228	110.947	0.004834	0.330311
FBgn0003124	polo	148.471	154.359	117.032	66.3745	82.3224	79.5849	53.4719	65.7267	75.877	1702.09	1636.1	1631.54	225.377	274.706	271.412	365.525	406.052	405.894	442.798	411.271	398.727	612.868	557.932	567.513	0.00485019	0.464618
FBgn0035122	mRpL17	191.303	236.031	290.273	139.653	110.572	146.663	81.4126	45.8065	73.317	218.398	243.364	279.504	165.337	159.414	158.864	172.973	150.048	160.009	166.197	172.43	181.072	108.506	121.684	121.968	0.00487442	0.279451
FBgn0026257	cav	183.306	168.268	122.809	79.9764	74.7727	77.3641	51.0694	54.6311	58.9834	96.6395	130.679	157.269	112.762	113.734	122.952	114.234	125.896	112.034	118.043	102.007	101.379	189.95	166.485	159.99	0.00488901	0.347153
FBgn0027786	Mtch	23.1314	29.1873	33.3455	9.45905	5.0951	6.07866	6.51957	9.67796	0	97.9107	90.2192	98.4035	57.5466	72.559	75.3369	106.025	98.7998	110.77	125.748	108.198	117.856	137.372	125.037	127.382	0.00489498	0.189082
FBgn0266669	Sec3	23.7698	15.0171	20.8703	11.3363	7.38191	7.84913	5.57339	2.85035	0	27.6853	30.7915	24.1818	19.316	22.4025	23.3418	24.5456	23.5701	23.293	24.201	20.3446	20.6528	52.5135	47.6532	46.4289	0.00491012	0.141202
FBgn0026415	Idgf4	340.89	377.193	472.059	251.952	203.711	244.86	162.508	157.123	189.458	3518.09	2957.27	2675.46	107.862	134.117	138.218	139.742	153.177	154.513	150.745	145.447	147.995	173.671	155.091	174.491	0.00491366	0.427755
FBgn0039170	CG13609	41.3	34.3839	28.0023	8.79429	23.6305	19.1833	12.5932	10.1694	13.7563	115.817	134.796	129.742	20.0428	30.5747	30.6825	30.2727	32.6989	33.7556	35.9405	29.1746	26.298	70.2472	57.6281	61.3363	0.0049219	0.352206
FBgn0034946	CG3065	20.6521	17.1353	16.7257	2.16391	8.19469	4.63419	10.0557	6.49348	4.95999	50.6928	48.2774	44.6497	22.6745	33.7279	33.8627	35.7287	41.2047	42.5457	43.2231	40.8072	43.8873	71.4057	84.9548	86.1111	0.00492608	0.394569
FBgn0033381	GstE13	60.334	40.4137	59.2101	0	15.9518	14.3497	7.88523	18.8745	7.53714	287.427	329.308	304.298	45.2166	56.5746	51.9943	58.465	56.4485	59.441	60.5442	61.0921	58.2111	51.4007	52.7602	56.6469	0.00493619	0.214412
FBgn0034000	CG11808	83.3475	97.449	70.4429	30.479	59.6537	36.1506	38.852	19.0426	30.277	190.36	208.346	224.404	22.4454	32.4891	33.0584	36.9933	31.0063	34.1118	41.0575	28.334	32.9067	40.3738	41.1601	43.2639	0.00494429	0.350946
FBgn0033029	Not3	215.435	217.408	134.774	89.5915	66.1247	75.615	43.8645	30.0798	16.3355	116.531	146.962	144.375	90.4908	122.79	126.396	100.503	112.525	113.827	100.377	81.9109	86.7353	246.596	222.039	206.284	0.0049574	0.159051
FBgn0003187	qua	12.315	8.09343	10.7166	11.0944	6.00356	4.81248	2.28653	3.84706	2.92251	33.1772	42.0806	37.9513	34.479	50.2378	52.284	66.1357	77.5061	73.5766	83.031	69.0862	66.0294	194.231	167.569	158.398	0.00496049	0.290959
FBgn0263998	Ack-like	37.4799	44.3528	55.9206	25.2983	21.4994	21.465	17.4916	11.9419	13.6708	49.5737	48.246	39.8471	42.6095	49.5536	48.8338	50.9681	47.3136	50.374	43.3411	42.6488	42.8271	70.3054	64.7453	64.0727	0.00496315	0.312909
FBgn0034982	Naa35	31.9583	26.0501	38.6167	21.5488	8.42659	14.6131	11.6674	11.9355	11.9571	41.2818	35.323	23.3841	28.2215	32.1071	31.4971	29.3132	30.2708	29.9838	29.1428	26.5405	29.8444	47.8349	44.0647	43.6587	0.00497316	0.36802
FBgn0032382	Mal-B2	28.0864	34.441	43.2761	10.0803	14.4441	8.50372	8.76677	10.6335	3.04045	175.097	155.048	145.613	28.2016	29.6211	28.0981	32.1912	32.3187	26.3149	28.9147	24.7869	28.028	21.3778	20.5524	21.2314	0.00499001	0.212098
FBgn0024330	MED6	218.957	201.923	146.046	22.8324	120.334	150.632	9.76314	5.83797	64.2742	258.113	307.13	318.299	48.477	48.5782	48.0407	49.7725	40.488	37.9602	42.3955	35.9133	33.2591	51.8988	66.7361	66.2131	0.00499304	0.140892
FBgn0030243	CG2186	4.04775	4.02381	0	4.95958	7.08244	8.08602	10.1731	10.8659	10.0335	160.909	165.942	178.418	5.45186	8.52375	9.88311	17.4237	17.8727	19.8062	28.0448	23.1361	21.869	84.6717	77.946	77.7696	0.00499966	3.84964
FBgn0037236	Skp2	255.258	220.25	186.332	130.463	90.0073	93.8733	98.7159	103.648	63.4189	452.852	516.281	547.863	111.026	123.249	126.205	137.794	129.721	128.42	127.627	124.991	120.592	171.089	144.185	142.354	0.00500248	0.401581
FBgn0032014	CG7840	375.264	264.107	278.397	169.872	154.633	169.428	109.108	109.357	112.989	528.326	562.495	568.925	163.223	197.632	207.082	219.849	212.652	232.819	225.186	204.136	212.597	365.897	331.578	330.529	0.00501188	0.361152
FBgn0035877	CG7083	12.0081	14.064	15.4408	7.7235	6.11321	4.72569	5.00935	6.29311	1.67045	137.924	139.331	142.406	6.12993	9.81101	10.0566	13.0541	14.6549	12.9707	18.1053	11.7239	14.2356	38.2056	33.8799	33.2483	0.00501374	0.312503
FBgn0025740	PlexB	3.93239	5.4279	3.79442	3.3234	3.31495	1.65122	1.60593	1.24419	1.35214	72.9561	87.4274	162.918	7.10976	13.888	16.4884	19.6389	26.1927	20.8046	25.6802	20.866	22.2234	111.815	76.2716	74.4498	0.00502643	0.319449
FBgn0035335	mRpL23	56.3227	52.0871	69.1822	6.17791	23.3924	23.2758	20.1899	18.6936	0	154.902	241.538	247.711	91.1772	99.9996	88.4795	111.611	100.995	95.7321	122.712	106.828	105.816	96.8966	103.789	92.6455	0.00504989	0.218948
FBgn0035830	CG8209	312.082	291.457	393.181	153.188	133.708	186.018	138.195	130.337	170.155	1014.66	884.253	917.506	68.2479	81.4441	78.4875	70.8777	74.9104	81.5896	78.4884	74.727	77.7855	88.6693	80.1583	85.7013	0.00506474	0.44013
FBgn0260794	ctrip	81.047	89.5142	87.8479	72.8584	75.101	68.4042	62.0552	42.854	51.1244	87.4073	94.6317	74.078	79.0762	92.079	95.0652	73.1745	80.1299	79.4444	70.2609	62.7347	61.9451	319.04	273.051	247.696	0.00511275	0.603824
FBgn0002441	l(3)mbt	56.646	74.7747	55.5177	33.002	35.0725	34.8739	29.2564	25.4337	21.1538	190.38	189.29	177.492	30.8844	38.4858	38.9749	34.5253	38.5347	39.2766	41.5134	33.982	32.282	86.1996	75.7637	72.3235	0.00513331	0.405716
FBgn0024314	Plap	102.071	85.8597	134.145	49.0153	43.9106	42.1715	23.5992	25.982	32.5098	278.202	224.905	188.68	69.8366	80.4537	80.1993	81.9226	83.9719	86.5206	81.6055	79.1546	75.7125	104.435	97.051	94.3082	0.00518488	0.254881
FBgn0001291	Jra	68.8002	60.9229	77.72	26.6299	34.2013	33.7311	21.488	17.5952	37.7692	206.378	179.235	149.007	39.9145	52.7215	56.0919	53.6549	68.8976	63.9325	72.3422	67.4001	66.2887	112.392	124.785	118.365	0.0051877	0.370475
FBgn0050077	Blos1	83.3909	58.375	60.4762	24.5928	22.9097	31.202	24.0356	17.9782	23.3378	152.534	169.693	148.133	15.6151	25.7489	27.4979	24.7787	28.197	33.4785	35.807	27.5068	30.6702	35.5901	38.3161	36.701	0.00519112	0.323135
FBgn0034726	Mes4	44.4864	46.3151	41.1554	22.9652	0	19.7006	9.96867	20.4993	0	68.226	111.935	102.154	67.4963	56.3766	65.8499	74.0961	74.8156	77.2955	83.9677	69.4921	68.9227	70.057	87.8072	73.1698	0.00519552	0.230893
FBgn0036314	Sf3a2	185.774	172.279	160.541	62.6164	68.2786	89.8436	102.97	55.6043	46.9845	590.531	648.631	658.592	61.7467	73.6944	73.0945	64.8521	62.6636	62.0231	65.514	69.7329	68.138	55.1969	66.5515	71.3172	0.0052248	0.396378
FBgn0032354	CG4788	187.184	153.549	132.986	88.7999	79.7247	86.2758	69.6132	72.4999	69.1828	725.207	761.654	809.176	51.104	66.8018	68.9398	69.9001	66.9578	76.3775	72.7822	73.6843	66.6068	110.3	110.473	122	0.00523972	0.446037
FBgn0020513	Paics	13.1771	16.4823	19.425	16.4537	8.01597	7.44376	6.12294	6.83249	5.7827	472.264	435.185	464.085	44.4922	55.5718	56.5632	74.232	79.0925	75.8348	86.6037	76.192	78.0508	121.083	109.844	115.359	0.00524249	0.381753
FBgn0033853	CG6145	16.4559	11.2656	12.7184	3.28008	3.73644	6.16535	0	4.55156	0	78.4553	95.8767	99.4713	19.9056	25.5648	28.2047	33.5156	38.752	36.9499	44.0256	37.2979	43.1072	75.026	76.9266	82.6495	0.00524901	0.112551
FBgn0050094	CG30094	46.494	72.0802	61.9407	24.3987	36.4685	21.6991	19.0024	0	0	90.8426	107.531	122.206	15.7297	28.0023	23.8401	25.5453	21.7342	19.8612	18.0834	17.5303	19.9784	51.1186	40.1313	38.3147	0.00529211	0.105268
FBgn0001491	l(1)10Bb	134.667	151.48	140.324	67.6593	70.0022	41.2483	89.2749	79.1078	50.6509	1040.67	1171.83	1211.44	52.9067	62.4826	63.8507	86.7029	94.3898	80.5868	106.249	83.9552	92.8281	122.603	115.273	113.581	0.00532542	0.513596
FBgn0031189	CG14618	62.4645	40.1423	57.3849	28.2382	22.1363	25.503	5.29579	15.3889	15.1234	52.8609	54.0671	56.1491	19.038	25.6672	29.7668	24.5204	29.3025	25.3277	30.7872	26.2219	30.4141	59.3541	67.3139	58.9966	0.00533108	0.223812
FBgn0000289	cg	124.086	115.512	171.746	72.5782	64.9995	87.4141	44.3055	38.347	24.6536	342.846	301.918	355.741	87.7151	94.5061	93.9936	102.164	100.947	108.661	116.726	100.176	100.264	189.114	186.194	179.478	0.00533552	0.260867
FBgn0038427	ema	24.5144	31.6358	23.1978	13.6472	10.0378	13.8811	11.9808	7.00085	4.8	150.093	158.031	152.921	24.4248	30.7228	33.4729	35.883	40.2882	40.7239	38.7004	36.8531	36.8517	86.7319	68.4581	70.1174	0.0053618	0.299713
FBgn0001197	His2Av	743.91	963.295	931.168	643.777	467.55	560.888	214.777	462.468	234.2	9277.01	11038.4	13246.9	648.495	698.764	692.225	837.068	915.367	937.559	1086.03	946.242	996.735	1171	1216.14	1247.72	0.00537142	0.345457
FBgn0036277	CG10418	247.938	252.197	170.693	152.961	90.0817	98.4271	23.5296	75.9228	0	414.895	575.491	481.198	18.8651	38.1394	43.6096	31.8193	40.6829	34.7697	28.5094	42.8235	43.727	62.871	73.1148	65.0493	0.00537542	0.148253
FBgn0031601	Dim1	149.542	123.3	171.4	86.3323	68.0919	92.7049	37.1415	55.2127	0	443.252	517.649	501.556	32.9478	42.7767	38.7753	41.6535	41.0583	48.0804	52.7237	29.2244	39.2763	69.3878	64.204	58.4105	0.00538443	0.207892
FBgn0030834	CG8675	29.7329	39.8479	49.9753	13.6368	10.8817	24.2133	5.94287	8.45267	8.2077	77.2739	55.7786	61.678	79.518	68.8139	62.7546	64.7039	69.7656	70.8617	72.3419	66.7179	69.3863	69.3019	66.1886	65.3207	0.00540007	0.18906
FBgn0033551	CG7222	45.8769	83.6354	78.4116	19.8516	13.3602	29.9059	0	8.40846	0	885.76	1047.79	1130.83	44.6067	69.7715	69.4445	81.7588	90.6874	89.8453	99.8937	86.2953	86.258	116.632	116.124	120.302	0.00540532	0.0404401
FBgn0011768	Fdh	562.2	403.861	612.638	282.056	302.635	263.059	188.76	186.996	158.09	1019.25	868.843	677.717	417.031	386.494	372.701	380.696	361.877	374.124	335.861	359.415	360.87	281.21	314.482	301.298	0.0054355	0.338156
FBgn0039306	RIOK2	130.611	129.532	95.446	91.1464	75.7633	85.876	58.9911	41.319	38.1635	15.1749	22.8286	13.6257	50.3514	56.8384	54.9507	49.4082	59.2395	54.0766	49.184	46.5758	47.632	68.5606	67.8947	67.2157	0.0054491	0.38942
FBgn0032600	BuGZ	176.374	112.095	151.785	34.126	60.3189	56.6298	17.2311	50.2419	18.7841	116.237	197.985	230.047	44.2309	41.6813	53.4573	50.3668	43.0732	44.8752	54.8241	45.8908	42.9285	72.7021	89.1874	84.9204	0.00545417	0.195925
FBgn0030969	Usp39	40.6802	39.1301	29.974	12.081	11.8146	16.5235	4.56661	7.68619	16.6854	110.925	106.33	126.537	36.2122	45.7032	46.3742	55.7084	54.2529	56.3393	66.1882	55.5291	54.3598	90.8435	97.3031	98.219	0.00546912	0.263592
FBgn0036691	beg	38.3541	51.1279	53.3519	42.4177	25.6044	20.1985	23.5644	20.5398	18.5509	66.7036	62.081	48.0887	39.1243	41.3692	40.22	38.1944	39.3053	38.7685	36.8053	36.0483	36.4262	43.7334	51.1312	49.0564	0.00547035	0.438657
FBgn0000250	cact	173.779	192.922	149.797	66.429	107.866	104.932	81.3447	98.9074	59.4701	1831.13	1842.27	1868.64	168.641	206.518	224.649	286.236	290.921	293.978	327.377	257.932	268.89	406.924	394.34	410.375	0.00547861	0.46413
FBgn0027547	CG1927	58.3778	53.9671	49.2763	35.4147	26.9081	33.1987	17.7002	22.5965	33.5374	173.573	192.147	151.715	46.7221	62.9069	65.4526	75.5362	73.9875	76.5861	75.8084	74.2173	76.5177	112.879	130.899	129.252	0.00550402	0.456835
FBgn0260936	scny	69.9505	80.7198	61.5853	67.0002	37.3952	49.0838	38.4318	42.2886	35.6067	229.992	211.38	241.216	44.369	55.1947	54.4731	54.6964	55.9412	56.1084	57.3919	51.4612	48.9528	94.0757	88.6888	88.1399	0.00550577	0.548052
FBgn0037529	mRpS9	82.0273	51.7439	78.9831	26.2041	53.8131	45.6888	19.4545	19.1046	15.4262	184.566	182.732	202.873	100.04	91.9665	92.8971	87.0302	88.4897	90.549	88.9704	87.925	86.2916	103.69	99.402	106.735	0.00551155	0.253744
FBgn0261838	pre-mod(mdg4)-Z	12.2894	13.8781	14.11	0	16.22	4.41982	2.42869	6.32895	0	54.9019	93.7137	59.0425	12.5221	10.12	9.75454	12.7098	17.8634	17.2085	23.8549	13.2011	19.9122	32.642	35.0566	34.5465	0.00553042	0.217432
FBgn0037087	CG7519	95.5902	98.5283	95.5578	65.2595	54.7439	54.5148	0	47.0753	18.7916	491.295	581.336	651.843	58.0391	67.0129	70.5568	95.9544	86.3505	89.3959	116.965	96.1803	103.92	113.581	117.954	114.607	0.00554717	0.227381
FBgn0025809	Paf-AHalpha	169.474	188.197	257.423	65.0772	53.4739	63.3573	15.6575	65.8072	37.3786	874.289	986.668	1018.08	68.4919	67.1583	69.7747	69.5115	74.5839	76.7539	72.0106	79.9716	68.7499	93.5851	109.752	108.728	0.00556073	0.193212
FBgn0263852	Dad1	253.567	228.917	194.682	109.187	82.8151	102.22	132.257	84.1866	94.0091	1319.28	1714.96	1553.52	76.1752	83.9573	96.5435	88.9642	83.3028	93.477	107.821	81.9254	89.4711	141.919	133.707	130.778	0.00557467	0.458458
FBgn0036889	CG14100	55.4558	72.5431	81.9339	48.7789	31.9052	37.367	30.5485	24.9038	24.325	85.0093	90.7824	89.4658	33.5923	40.7978	41.7809	42.863	41.9198	42.9415	45.6006	42.8443	38.692	62.1106	61.5882	62.6985	0.00560694	0.380014
FBgn0028342	ATPsyndelta	594.366	597.779	708.445	340.187	329.389	415.75	153.627	242.2	359.494	2891.4	3203.44	3122.83	242.495	279.739	279.692	286.217	288.983	282.952	292.57	290.068	289.199	290.118	312.013	320.693	0.00561229	0.397414
FBgn0267795	Frl	0	2.19578	0	3.78149	1.34619	1.4399	5.00679	6.11655	7.38308	12.7193	14.2966	17.8487	4.481	9.07662	9.48142	14.4755	16.7454	18.1761	25.7176	20.0194	21.0682	84.9354	71.3428	63.7472	0.00562427	8.42819
FBgn0051450	mRpS18A	52.9027	53.7151	28.348	0	0	9.88858	0	0	0	110.466	147.892	179.183	167.29	158.034	169.099	209.832	210.834	187.053	216.939	195.136	206.924	182.889	203.585	187.282	0.00567352	0
FBgn0261797	Dhc64C	79.7147	97.7274	84.8787	68.5032	63.8895	59.8353	42.6581	38.4945	56.6973	180.074	154.291	112.251	97.0021	106.702	99.8732	75.4809	79.6582	77.471	51.3448	49.0663	48.4314	180.487	125.424	111.963	0.00568609	0.525501
FBgn0035044	CG3663	88.502	111.652	64.8765	33.6093	20.1911	35.5678	9.8835	9.64374	20.0063	60.6318	32.5349	40.1459	38.1151	36.6743	39.3566	37.9531	35.7469	43.5779	31.2138	39.3951	39.6554	47.3901	50.0183	50.751	0.00570506	0.149166
FBgn0052786	Gem4b	19.5249	11.924	18.6276	21.5709	6.12807	13.8357	3.58631	2.7481	4.27084	23.9803	26.0654	81.4302	6.49931	11.6835	12.4388	14.63	16.7201	14.8791	15.7989	14.2267	14.229	51.9937	42.6246	41.6949	0.00570667	0.211781
FBgn0051357	CG31357	287.689	225.307	256.289	109.952	169.142	130.549	162.959	127.015	123.433	772.536	744.272	719.855	53.4012	61.1761	56.9464	45.9094	50.3223	48.6174	45.9825	53.0495	49.2167	60.3698	49.3107	48.6493	0.0057135	0.537391
FBgn0036928	Tom20	259.77	252.205	319.462	175.862	141.029	164.964	157.225	150.12	168.808	676.289	689.344	697.393	191.336	203.942	195.457	241.768	252.491	226.868	292.26	280.864	245.804	370.776	362.069	359.735	0.00571637	0.572687
FBgn0004177	mts	1059.9	1230.23	1520.95	857.006	685.891	840.186	412.605	516.917	574.243	6302.93	5185.95	5444.46	497.492	520.965	513.863	484.261	467.555	483.332	517.688	477.365	475.579	520.368	497.283	544.203	0.00572706	0.394577
FBgn0034704	CG6758	51.0542	69.2235	61.0438	25.904	31.614	33.7407	33.1422	22.7788	27.6463	15.1779	16.4922	11.1921	42.4506	48.9383	53.0316	41.6266	41.0829	45.9462	45.2693	38.8666	40.2304	54.1614	51.4342	52.8019	0.0057346	0.460879
FBgn0040477	cid	85.6804	78.9853	109.581	69.1165	63.1575	58.8829	43.7218	31.5267	25.1	240.485	215.807	195.506	47.6847	62.9777	70.4106	69.3231	79.6393	83.8371	93.7415	89.8519	83.6923	124.882	156.138	140.3	0.00576546	0.365907
FBgn0037370	CG1236	102.878	74.8979	95.2279	51.6841	41.7386	56.3412	30.5466	38.1827	47.6725	353.523	368.997	311.687	61.5998	80.9884	80.5622	95.9735	87.9003	87.425	83.435	83.1886	81.0479	98.2425	101.153	105.794	0.00577964	0.426374
FBgn0032514	CG9302	86.1162	90.0246	94.3121	45.4505	43.2538	42.4763	5.8776	32.9683	44.2414	322.998	307.315	295.963	90.3078	93.655	93.1898	101.438	97.759	103.505	104.684	97.9849	94.4801	136.58	121.423	131.751	0.00580225	0.307216
FBgn0024510	dlt	67.4309	68.1451	49.8644	40.0263	32.6936	40.6819	28.5685	31.2742	25.0125	104.025	124.883	112.546	37.6551	38.1983	36.4405	34.0859	36.4902	34.775	36.005	30.1294	29.2793	45.0001	38.2304	39.7606	0.00581848	0.457587
FBgn0044324	Chro	51.4318	58.4063	75.5344	35.8998	32.1284	34.8727	21.5919	22.6638	10.8025	256.312	268.591	273.436	46.9701	62.971	64.4943	66.767	77.6925	69.013	78.7855	61.3326	66.1656	179.944	166.4	158.884	0.00583764	0.297014
FBgn0023169	AMPKalpha	456.12	445.896	634.508	292.431	253.848	254.168	178.514	158.624	198.16	523.077	407.107	415.088	129.879	123.25	125.341	84.205	81.745	80.7194	72.871	73.5749	68.62	90.0695	89.9263	91.0177	0.00585542	0.348382
FBgn0039407	CG14544	39.1003	32.7431	51.8444	12.1637	13.7741	13.8085	11.8282	6.21445	0	22.4126	17.735	19.4492	14.9542	14.7761	13.3959	11.9239	14.2431	15.8274	16.5712	14.5385	13.8343	12.4816	15.4995	16.1523	0.00585663	0.145873
FBgn0036662	CG9706	48.8091	64.6559	81.5689	27.1401	28.9676	37.2397	11.5174	17.3092	10.191	20.8285	14.8396	16.4282	25.5131	30.5158	31.1881	25.6583	31.4124	27.7344	27.5269	23.985	27.2765	47.9173	47.0025	43.2465	0.00585783	0.200055
FBgn0026400	Noa36	127.462	115.813	164.283	89.0884	56.1684	69.6087	50.0659	54.7973	24.9693	165.572	172.559	177.734	97.3521	113.956	115.758	106.827	109.342	114.058	98.4739	97.0657	97.9365	100.567	125.677	120.834	0.00587225	0.318561
FBgn0024814	Clc	181.918	234.113	254.915	189.652	140.204	128.513	95.86	113.349	103.934	922.503	883.877	900.792	127.622	155.784	161.521	177.556	173.478	189.889	205.035	189.477	180.032	282.968	299.587	297.708	0.00588526	0.466717
FBgn0266136	Gyc76C	14.6985	17.6529	23.583	11.3232	13.1512	14.1115	4.41083	5.0682	4.44918	51.2684	44.8756	93.4006	27.0679	35.1772	37.5273	34.199	40.2652	38.3313	37.9504	33.2654	33.4672	120.466	102.717	103.072	0.00591577	0.24901
FBgn0261360	CG42637	14.6985	17.6529	23.583	11.3232	13.1512	14.1115	4.41083	5.0682	4.44918	51.2684	44.8756	93.4006	27.0679	35.1427	37.3348	34.1228	40.1934	38.234	37.8306	33.2062	33.3658	120.186	102.643	102.833	0.00591577	0.24901
FBgn0051390	MED7	165.373	182.262	188.893	50.0319	65.8153	64.4678	104.991	71.9975	40.4283	434.199	552.134	525.702	29.9855	35.4772	39.0607	38.5062	42.1572	35.6301	42.6786	33.0514	38.069	48.7833	47.8377	48.2774	0.00591605	0.40523
FBgn0267347	squ	95.0712	84.128	85.9595	26.1882	48.1083	47.0033	29.8343	47.6938	11.4322	92.7379	111.908	148.764	62.0532	89.8437	97.1342	116.969	118.096	109.363	116.564	117.596	103.088	153.755	157.867	156.395	0.00593099	0.335498
FBgn0086445	l(2)37Cd	16.5439	22.8556	24.736	8.73071	10.555	13.9853	8.77727	3.7235	5.38263	92.2304	117.103	117.28	20.6103	22.0631	23.7058	22.7245	30.0049	25.6915	30.6554	23.9171	25.0156	41.4875	41.6048	38.5608	0.00594361	0.278838
FBgn0035483	Mul1	27.2926	30.9808	31.0936	34.7577	29.7644	18.848	10.7886	19.3651	14.8145	76.6081	58.5918	94.0386	28.6976	26.9118	28.2367	37.4449	33.0632	32.1484	33.756	33.3653	31.2711	41.3826	46.7396	43.4413	0.00594673	0.503186
FBgn0004374	neb	25.5003	32.3954	27.1673	25.1058	20.1077	25.5232	15.796	12.924	8.36252	30.4157	36.7874	28.2883	22.2479	25.3923	26.9798	27.0017	29.2581	28.2257	28.8896	27.6972	23.7156	46.9295	44.7927	42.492	0.00595844	0.435942
FBgn0037372	CG2091	411.148	280.032	282.48	198.076	137.033	171.371	78.5355	98.1464	97.1123	436.185	480.592	451.698	104.625	110.479	113.736	112.422	107.58	100.561	106.551	95.6194	98.2003	114.736	115.178	108.777	0.00596549	0.281201
FBgn0010762	simj	61.0709	67.348	62.4483	50.1307	51.3147	47.3129	45.6546	35.0443	29.8432	179.359	175.635	198.456	38.7241	46.5144	46.5341	50.6041	54.5997	55.252	61.7897	53.6368	52.1426	110.999	101.553	102.497	0.00598181	0.579157
FBgn0263199	Galk	17.0092	10.1068	15.4326	4.12169	2.75009	6.94443	0	3.72858	0	12.2774	9.36139	11.1921	37.9985	42.3221	42.7068	44.8148	46.6174	47.1056	39.9023	50.2683	38.5529	44.319	44.8527	41.654	0.00598593	0.087631
FBgn0051184	LSm3	308.794	231.954	262.629	128.335	87.9275	113.732	33.0406	79.7119	127.561	915.878	1226.32	1166.44	51.2843	68.1345	70.22	64.8883	64.7484	69.2652	84.7595	72.4542	74.2084	135.255	134.367	138.533	0.00599334	0.299129
FBgn0029785	RpL35	515.405	463.077	696.656	334.636	205.398	368.46	140.363	156.036	0	795.335	912.358	941.301	6434.26	5427.78	5358.83	5704.77	5164.44	5329.62	5373.78	5840.65	5807.28	2236.76	2203.93	2289.42	0.00601473	0.17694
FBgn0035631	Txl	589.896	460.096	612.965	280.926	265.068	276.536	174.907	139.7	292.05	838.8	844.248	778.226	182.942	208.2	218.22	193.232	209.103	202.707	210.712	203.494	189.564	184.285	207.343	196.083	0.0060159	0.364806
FBgn0030060	CG2004	178.611	133.401	143.413	80.1677	94.0088	86.3283	57.6853	51.0625	81.9081	340.604	301.574	294.696	108.497	111.198	107.879	115.59	106.798	117.542	111.467	109.359	107.864	107.116	108.061	117.873	0.00603021	0.418634
FBgn0040786	CG14104	99.2712	147.641	114.447	45.2933	35.5158	35.6503	36.9622	24.4145	47.9142	96.4513	73.6708	103.884	23.171	29.8649	32.0486	15.8307	23.7387	18.8337	19.5634	24.705	23.5594	24.3856	26.8468	32.317	0.00603313	0.302444
FBgn0010041	GstD5	36.0133	19.6164	30.354	7.94765	13.0255	15.8281	3.57673	3.53655	1.27024	19.2995	15.6916	28.0141	0	0.252017	0.1483	0.272634	0.127241	0.236284	0	0.031594	0.120014	1.53748	1.78962	0.514882	0.00603366	0.0975012
FBgn0035425	CG17746	215.943	191.39	293.945	119.825	82.8092	83.1869	73.9133	66.3798	36.8233	641.027	595.575	508.07	93.5962	104.972	108.526	95.7206	98.6501	102.581	107.888	100.264	103.198	153.887	156.459	157.89	0.00605866	0.252562
FBgn0033471	CG12134	161.884	109.612	124.509	64.2017	50.2916	64.9658	48.2655	37.3302	13.2958	85.7862	71.64	80.8074	45.7634	44.4772	50.4017	49.4406	49.5517	52.0958	49.0461	44.4334	46.2478	55.6094	60.7244	61.1613	0.00606282	0.249723
FBgn0038974	CG5377	22.6435	28.5172	32.8002	4.54055	12.2441	7.83661	10.6344	13.3439	9.04704	32.2649	28.2743	11.1062	32.4537	27.9724	29.9665	42.335	36.3962	33.9391	32.554	32.7778	37.9246	39.7286	48.3169	41.45	0.00606386	0.393343
FBgn0031824	CG9547	76.823	50.5142	60.5534	19.0154	20.9672	31.7447	24.0191	20.8346	18.3897	34.6607	27.7318	24.2398	60.8948	61.6427	56.5693	59.7715	59.7591	61.0335	64.6075	56.5062	57.6681	41.7625	46.2229	44.8678	0.00607948	0.336597
FBgn0032194	CG4901	35.2971	40.7253	25.2856	13.9978	23.9182	22.9548	8.92057	8.57299	1.00485	3.02944	4.56628	2.79884	51.2679	60.9282	57.792	62.0895	58.7202	60.0925	51.0739	51.0861	49.8806	105.487	103.241	94.1872	0.00608466	0.182596
FBgn0034919	CG5569	150.616	108.707	105.922	34.2102	51.6662	57.158	33.7934	36.0936	0	134.9	140.546	130.78	40.3717	54.7005	61.6233	54.5743	58.2998	63.2757	68.6682	58.4884	61.1252	74.7388	75.925	74.7231	0.0060882	0.191343
FBgn0086442	mib2	139.968	125.81	149.27	97.6703	70.4949	89.4492	64.9856	60.8812	93.4916	126.837	114.775	114.938	55.3967	58.8404	58.6523	55.2414	58.1068	58.8794	59.6482	57.2174	52.5615	97.5519	94.6813	90.9824	0.00610182	0.528514
FBgn0039218	Rpb10	688.272	928.171	1077.26	302.945	298.162	289.82	276.281	195.267	0	1042.18	1148.77	1303.37	85.7779	94.0573	91.1582	83.9913	88.1239	72.7724	88.0713	71.2549	82.4633	108.217	96.6511	112.844	0.00610364	0.175056
FBgn0020653	Trxr-1	888.764	562.217	819.245	372.287	429.557	343.415	259.862	197.296	205.094	1226.11	916.319	819.756	420.264	400.863	393.813	427.411	421.645	418.717	419.732	411.315	426.654	379.334	385.785	394.216	0.0061116	0.291712
FBgn0002901	mus304	32.9327	33.8628	28.1506	17.5465	14.2838	14.398	17.2376	7.53973	5.17555	41.3026	46.6501	50.6947	28.6574	30.7062	34.9408	31.5782	32.1916	30.0094	32.642	28.683	27.8848	62.0493	54.5141	52.6466	0.00611395	0.315472
FBgn0004838	Hrb27C	329.564	344.74	346.675	200.117	241.661	257.371	200.847	222.265	268.663	3351.02	2827.32	2559.32	288.355	370.184	381.729	481.122	545.584	580.904	639.545	570.552	600.469	942.916	1107.38	1097.3	0.00611688	0.67756
FBgn0029861	CG3815	48.7366	38.9213	56.3358	28.8684	28.0043	33.298	22.3852	18.4627	13.6587	17.6275	21.5044	13.0725	36.321	41.9841	42.252	48.0724	48.2467	48.4609	56.0046	49.6356	49.8984	76.5986	76.1824	71.5852	0.00612177	0.378535
FBgn0002783	mor	160.611	186.627	146.217	105.412	133.537	119.172	94.3189	82.0122	104.005	786.179	783.485	699.283	84.2544	106.314	106.736	107.957	115.514	113.796	120.121	106.915	98.6868	176.284	163.031	164.795	0.00612797	0.568108
FBgn0030869	Socs16D	6.16541	6.91886	6.55653	9.37616	21.9274	10.1279	13.0755	11.3576	15.743	35.2805	42.1438	35.9997	16.9134	19.9269	20.2698	28.1819	33.1128	35.7962	41.3225	37.2912	36.86	75.5605	85.3797	80.0938	0.00613275	2.04555
FBgn0038771	CG4390	216.734	189.483	295.228	100.558	76.6413	96.1539	75.7804	56.9652	56.8011	458.11	448.579	441.858	155.561	150.007	155.69	151.292	151.662	157.629	161.183	149.104	158.12	190.787	188.629	188.558	0.0061709	0.270223
FBgn0033879	Echs1	813.85	620.796	938.978	447.127	515.347	463.003	223.897	336.399	254.143	5247.24	4302.03	3617.95	467.736	474.362	473.297	498.648	509.705	515.996	502.08	511.937	521.279	481.529	533.872	551.23	0.00617645	0.343121
FBgn0011666	msi	307.217	225.435	311.608	162.302	122.209	145.607	137.984	81.1125	111.549	119.16	100.087	95.011	65.5559	79.8024	74.8776	79.3333	88.8171	89.7506	93.873	88.8846	81.096	128.202	136.807	133.288	0.0062098	0.391639
FBgn0039229	Saf-B	48.6645	58.5821	46.7728	15.6975	31.4028	27.4985	20.5749	31.7078	23.6186	843.453	754.913	739.009	14.8883	24.2558	29.3574	32.6625	40.619	37.9636	45.7612	35.4124	38.4217	69.9951	67.4351	67.0526	0.00622705	0.492803
FBgn0022288	l(2)09851	210.043	166.205	237.241	127.755	139.851	143.788	97.9268	93.2312	72.0026	204.082	223.909	218.725	101.058	114.401	118.02	111.157	110.684	107.163	102.319	109.398	102.033	146.802	145.861	144.101	0.00623006	0.428958
FBgn0031497	SerRS	567.62	430.989	605.346	313.185	305.456	321.344	274.219	207.228	231.245	795.541	635.324	474.328	178.79	173.353	170.354	165.182	155.97	160.763	160.093	163.576	153.608	139.811	141.355	150.015	0.006251	0.444334
FBgn0020616	SA	46.742	65.2613	51.7354	18.8434	24.5039	33.4841	27.457	19.7138	17.8837	52.563	52.9867	37.9005	48.417	54.7049	54.982	44.4866	51.0323	50.4551	49.2751	46.8827	41.2142	101.063	91.3719	79.1877	0.00628365	0.397307
FBgn0029888	ND-ASHI	287.57	205.534	242.739	121.661	89.266	83.3033	90.2914	72.4567	0	676.161	652.784	705.39	83.4299	83.3976	86.9504	82.7809	73.7975	76.7677	65.2344	79.4214	84.4584	108.54	95.763	98.0383	0.00630298	0.221172
FBgn0039139	Mettl3	74.5564	50.6583	64.113	17.3064	28.7982	27.3069	26.2268	16.8972	7.23913	58.5503	51.0537	40.4053	25.1752	26.9916	29.2077	23.283	26.6276	22.9141	26.3389	24.2779	22.1016	32.1067	35.9644	33.3574	0.00630366	0.26601
FBgn0034583	CG10527	497.699	343.119	449.287	229.421	161.673	210.027	184.62	185.732	198.28	750.699	636.976	557.912	137.701	136.306	130.115	132.68	119.601	117.385	131.821	112.056	116.198	130.307	135.709	135.034	0.00632268	0.440764
FBgn0039674	CG1907	60.0852	61.3193	85.5993	44.3428	45.2971	55.4499	26.516	22.8281	25.7855	250.766	243.338	241.53	41.2394	45.2108	42.3085	50.6877	57.1379	54.0017	55.3466	54.7209	58.1699	69.0046	80.6425	81.0373	0.00632376	0.362938
FBgn0011725	twin	263.158	315.775	305.554	173.227	184.91	177.338	91.7552	125.762	182.057	2817.54	3058.33	2635.72	149.754	177.331	176.594	218.244	234.88	247.092	278.715	269.74	259.021	321.859	259.897	276.583	0.00635537	0.451759
FBgn0261933	SmD1	298.413	273.255	344.151	136.651	151.295	127.044	122.225	136.769	191.673	1290.43	1151.83	1227.71	165.576	198.096	223.802	246.149	256.547	239.189	281.509	264.257	285.91	245.351	291.833	286.75	0.00636916	0.492092
FBgn0027087	HisRS	100.891	123.372	131.367	74.9908	98.6166	85.4341	27.8238	39.9444	64.845	245.419	201.963	201.224	152.097	131.434	126.201	117.47	122.578	121.961	115.174	104.409	99.4109	140.688	139.01	140.683	0.00638048	0.372897
FBgn0001125	Got2	665.697	478.18	711.243	416.556	292.567	351.281	263.355	227.222	231.853	816.292	662.029	510.042	296.648	311.174	320.415	307.468	335.921	333.151	333.587	323.953	317.99	287.413	357.494	337.97	0.00639151	0.389425
FBgn0062449	CG13197	37.1275	52.9731	31.2427	17.3995	15.7148	39.1659	0	9.07824	0	48.62	82.0268	63.1492	49.5667	67.1479	68.1033	70.9962	82.9211	75.418	76.6559	73.5966	65.7873	116.87	121.056	110.457	0.00639865	0.0748145
FBgn0035528	CG15012	126.489	136.894	68.7799	44.711	0	26.3341	0	0	0	682.27	745.582	792.069	41.5632	65.564	68.3508	81.0341	75.205	73.6413	83.7773	70.1295	73.728	87.8572	76.3277	81.9087	0.00639897	0
FBgn0015790	Rab11	284.961	171.028	258.683	106.215	111.294	150.083	53.5746	56.6065	62.7701	1029.11	971.389	1006.55	139.074	167.949	180.606	203.704	227.186	232.545	246.787	241.429	232.801	334.817	326.628	340.632	0.006399	0.242001
FBgn0032877	CG2617	0	1.60057	1.60864	0	1.1816	0.455605	4.28579	3.65284	4.25578	61.9897	71.7071	72.4773	10.8069	13.3175	13.1626	18.4805	20.7167	20.4422	23.9825	21.1155	24.7258	41.7152	42.5009	45.3206	0.00640591	3.79983
FBgn0000927	fs(1)Ya	398.432	355.906	498.797	237.873	282.611	264.274	180.461	188.65	207.935	51.615	68.5703	64.9195	223.786	247.874	240.49	223.681	222.916	229.057	207.557	210.825	205.393	277.796	298.915	280.573	0.00640789	0.460482
FBgn0034816	CG3085	15.2372	24.2365	20.8525	9.32678	6.76525	6.52514	6.67653	2.38671	0	112.615	108.507	85.5411	15.9412	22.3077	22.788	22.7831	23.5769	24.8491	18.315	23.3093	17.8276	26.5931	30.7324	32.1742	0.00641333	0.150237
FBgn0039508	CG3368	6.99782	4.75304	2.89008	7.33867	10.0862	12.275	12.3059	10.9081	13.5553	25.1566	19.7697	18.5421	20.989	23.931	25.7299	32.7394	33.915	35.0765	38.3046	32.1472	33.8279	66.5696	55.3497	54.0201	0.00641628	2.5114
FBgn0262647	Nup160	75.3284	90.2315	89.5463	66.1427	46.6164	50.7093	49.2708	38.3376	22.0136	146.667	165.714	160.649	44.178	47.745	48.2228	33.4363	37.4349	38.0349	34.5454	33.8495	30.682	66.0688	61.2206	59.0954	0.00642858	0.429712
FBgn0033738	DUBAI	58.8274	46.4287	70.374	29.7138	33.1376	28.0785	19.3687	21.5462	7.88864	197.87	202.897	185.985	32.4678	40.2581	40.709	44.2606	46.3732	41.8417	42.8075	41.2383	40.5347	91.7168	78.3653	80.4339	0.00645541	0.277877
FBgn0263236	SP1029	208.436	230.174	232.431	131.627	138.674	143.432	142.235	122.127	167.837	527.356	448.34	386.271	75.466	80.7015	80.1597	62.7111	61.2477	59.9004	58.6643	58.6942	57.8219	61.6836	51.0459	56.1193	0.00647021	0.644072
FBgn0010421	TfIIFbeta	76.8098	112.672	111.67	70.4592	90.6724	56.7344	25.9941	42.7525	33.2391	526.295	593.083	602.966	65.5232	78.2852	95.92	99.7865	101.401	96.4805	102.548	100.674	99.2658	121.002	144.772	141.771	0.00648524	0.338653
FBgn0026576	Pisd	248.899	206.985	283.771	150.998	123.913	161.998	136.516	113.128	94.2962	563.953	471.485	477.702	71.7168	80.1532	74.6955	83.5773	83.2604	78.0971	87.4742	79.6408	81.6273	114.165	116.706	117.481	0.0064872	0.465001
FBgn0000667	Actn	66.603	66.7055	53.4742	57.6708	51.1275	47.6822	37.9012	25.3983	33.91	194.504	180.489	187.585	65.3671	68.4163	67.6072	76.4613	77.3115	80.8339	88.1901	78.9364	78.7413	104.824	107.571	110.24	0.00649077	0.520442
FBgn0267792	rgr	3.84325	6.82294	3.42417	13.3241	12.7957	14.2551	10.637	9.91817	11.1492	5.97662	7.8911	5.62444	25.4505	30.9018	32.1148	36.8375	39.8797	42.8381	45.6436	39.1792	38.7281	49.6813	49.3068	47.8725	0.00649215	2.25008
FBgn0035725	Mis12	34.2636	31.9459	17.1986	23.9371	0	22.9603	0	0	0	6.8179	5.34041	0	31.7167	49.4272	55.0851	59.0363	61.6918	65.9592	61.3141	56.5668	50.702	79.2226	93.9871	78.3	0.00650497	0
FBgn0267976	Tim23	273.863	348.488	218.58	111.864	111.417	154.959	83.4625	91.6969	59.4917	697.832	906.852	675.094	273.499	305.271	316.868	396.72	368.528	366.07	431.004	384.92	375.564	463.405	470.764	460.721	0.00651315	0.279037
FBgn0028475	Hrd3	19.9682	32.8125	28.5396	2.61109	9.66909	10.8615	7.04338	6.07642	0	178.102	179.623	204.386	25.8208	40.465	40.581	45.6672	51.5196	50.06	52.6242	47.4876	47.7801	131.492	113.064	110.405	0.00652088	0.161335
FBgn0040235	c12.1	532.502	434.155	654.03	232.063	235.506	210.423	135.242	194.538	222.376	1067.76	1069.4	1005.47	92.3248	77.7316	73.9037	64.3184	59.93	60.4879	66.1081	54.6101	55.8854	79.0546	71.3062	74.6655	0.00654646	0.340692
FBgn0264855	AP-2alpha	62.3	78.7107	69.319	53.8852	61.353	59.9803	33.5755	41.6996	23.0445	38.1737	53.0383	35.7463	56.5541	70.4272	75.7596	83.891	97.8013	89.0553	104.313	90.5536	92.3897	221.504	211.505	191.972	0.00656277	0.467454
FBgn0010620	CG10939	47.7923	43.7646	62.123	27.9747	18.1213	20.6789	15.4862	16.5578	24.4478	88.4958	105.398	120.861	11.1458	16.034	15.9948	13.9182	20.1958	15.0537	18.83	19.0674	20.5165	43.104	45.3655	48.8258	0.00657791	0.367595
FBgn0027602	CG8611	38.1856	35.7282	24.4685	19.6578	22.4725	15.8022	9.49799	10.8683	11.6198	146.881	158.267	153.794	29.0328	34.459	33.4364	32.9774	37.5555	35.7666	38.4453	33.737	30.5341	54.6715	52.3208	53.8366	0.0065824	0.32512
FBgn0058160	CG40160	47.525	32.6775	27.2538	5.90859	17.5421	6.00695	1.99005	6.05037	3.39436	39.5125	40.8811	71.6165	26.6426	31.6169	34.0219	45.4271	48.0169	47.7236	42.4108	56.7422	42.3242	82.9112	73.1793	64.9198	0.00659028	0.106413
FBgn0011761	dhd	34467.3	34717.4	39842.4	25073.5	21176.6	23640.9	24766.7	23768.7	27691.5	19885.7	18805.1	13886.5	7935.06	8263.58	8318.81	8126.73	7387.58	7675.33	8718.5	8214.89	8622.66	7591.46	6944.11	6361.39	0.00660183	0.699156
FBgn0040931	CG9034	421.533	261.119	355.82	138.944	150.448	106.008	69.0297	116.389	98.2869	1289.84	1150.14	1091.05	49.5103	66.4115	74.087	60.4388	58.418	71.4255	68.0004	87.5719	58.0404	78.0552	99.3426	96.1809	0.00660188	0.273195
FBgn0034913	Snap29	223.401	222.238	324.438	150.833	123.205	109.834	80.3601	82.847	80.2264	339.058	317.154	350.97	82.7681	92.0998	94.131	81.0454	76.9475	75.4104	80.7975	73.6986	71.8966	87.9542	89.9165	90.9119	0.00660323	0.316116
FBgn0034599	hng1	31.5862	48.4716	49.1495	23.9151	28.362	34.7724	10.9223	14.9287	12.2306	33.0637	60.4536	76.1433	24.047	27.5231	24.6839	19.4103	25.5901	19.2461	28.3515	22.7662	20.9358	44.7814	46.2386	42.0159	0.00660904	0.294732
FBgn0284442	Mcm3	233.31	172.464	254.122	137.081	152.622	132.118	101.185	85.2861	82.8687	187.924	174.07	137.631	160.446	169.418	164.96	170.561	171.008	170.582	168.386	165.594	166.983	213.081	196.946	179.776	0.00663565	0.408155
FBgn0037660	beag	60.7265	71.0438	93.5436	29.8594	26.4393	30.2419	22.9321	22.9747	27.3797	98.98	87.0659	97.9542	35.8556	33.6908	36.3665	35.2459	34.3848	34.8494	33.6774	29.3368	32.8978	54.0923	52.6892	52.0845	0.00664822	0.325264
FBgn0038575	CG7208	38.0517	25.2039	39.4245	18.8275	17.9478	19.2578	10.2323	7.60807	0	15.654	26.1675	23.9964	45.7966	71.6343	76.2254	99.7994	107.669	98.5765	117.627	98.4281	95.1484	255.151	260.049	232.358	0.00665345	0.173747
FBgn0029175	sotv	44.8793	30.9789	32.7351	14.0558	16.9514	21.3254	13.5384	6.97962	1.53065	142.754	152.129	161.58	17.0309	17.3896	18.9621	18.7108	20.341	22.1802	19.8014	19.5794	19.1765	50.0706	40.0251	43.455	0.00665716	0.203039
FBgn0038108	CG7518	53.5468	56.0734	59.7865	39.569	35.6474	25.8626	40.2673	26.6029	34.8579	69.0854	67.863	63.657	43.6336	43.805	45.1635	36.7921	38.0038	39.9985	34.5532	32.9048	29.8493	76.1406	69.9082	64.1049	0.00666931	0.600497
FBgn0030786	mRpL22	122.327	112.615	129.287	76.1799	63.4673	61.9597	0	30.3775	59.1234	68.1516	120.889	93.671	71.6848	89.8306	95.4234	89.8244	100.717	93.9026	101.35	88.519	91.2279	91.5994	106.209	101.579	0.00668975	0.245727
FBgn0082831	pps	8.48238	9.12757	6.23863	1.31106	4.65264	3.92917	2.27151	2.73573	0	132.478	122.535	123.643	13.7311	19.6505	21.2335	23.4384	28.505	27.3287	34.4614	28.3206	28.0951	82.2105	75.4259	71.2462	0.0066937	0.20996
FBgn0030321	CG1703	48.5727	70.0089	61.1503	25.0829	34.8554	38.7454	27.7703	24.8795	28.9928	356.491	329.454	306.475	39.1477	53.8094	57.2226	58.2989	66.5778	63.4636	62.6042	51.4075	51.73	120.354	115.504	114.823	0.00670182	0.454247
FBgn0034058	Pex11	47.4252	58.2877	38.5789	25.5597	24.4907	22.895	14.447	14.4143	0	129.376	135.669	129.016	34.1548	51.9842	55.2401	68.0243	62.6453	58.212	60.3155	61.4138	66.5233	102.449	92.6684	99.6557	0.00670182	0.20002
FBgn0023094	cyc	117.372	99.1471	93.7971	86.1891	80.2004	86.9548	34.8686	61.2974	51.514	114.166	118.274	103.841	167.005	175.661	185.074	218.323	212.296	225.015	218.288	211.928	211.778	183.109	186.349	193.505	0.00670394	0.475901
FBgn0262467	Scox	53.4973	74.3803	76.7567	32.9249	41.1244	20.8174	18.2216	26.5883	31.2449	60.0967	68.0335	47.4596	57.7052	64.3729	67.3938	73.5665	76.5625	76.8635	91.8503	66.4757	76.6148	116.943	127.219	111.465	0.00671895	0.371662
FBgn0037878	CG6693	138.715	133.068	138.11	82.7105	77.5818	86.842	86.404	46.8372	35.023	533.768	485.505	452.042	96.7367	99.181	105.427	104.784	112.339	107.926	126.269	118.11	113.031	163.144	158.892	156.271	0.00674491	0.410508
FBgn0039712	CG15514	91.204	87.0119	126.463	41.6253	46.7883	53.7448	19.6018	35.4243	0	274.629	299.771	314.513	80.1707	88.6849	84.9508	95.3006	100.619	103.839	114.228	96.724	101.549	135.187	141.846	145.093	0.00676166	0.180603
FBgn0034792	YME1L	46.2127	56.245	49.14	31.5636	40.6769	35.6334	22.7735	28.7113	12.081	466.54	450.442	419.02	38.0881	51.6747	51.0128	51.1613	64.3578	64.2216	56.1031	60.7497	57.0223	65.3623	68.4841	72.2978	0.00677467	0.419306
FBgn0039828	CG1542	186.427	188.214	266.688	115.882	142.399	134.663	72.4422	79.6201	40.1057	556.631	573.504	624.879	112.066	106.689	119.902	131.11	135.63	134.618	130.548	127.999	116.068	154.998	151.626	152.77	0.00678283	0.29964
FBgn0039212	Syx18	119.209	114.29	87.2824	79.0981	91.4902	56.469	54.7124	39.6369	54.8165	213.802	212.409	206.863	65.3436	68.3179	69.4973	70.438	72.7675	75.361	66.7761	61.6499	62.7558	99.2323	114.649	113.3	0.00679691	0.465009
FBgn0036702	CG6512	53.8855	51.0719	76.0237	26.6999	34.2489	26.7651	21.6906	19.1874	16.65	66.7442	60.1146	53.5394	47.2299	50.8086	56.2337	56.0095	61.0307	60.2585	65.6984	57.6413	58.8792	102.482	99.4986	93.8528	0.00684353	0.317868
FBgn0261535	l(2)34Fd	15.5948	18.0701	13.2774	7.66119	4.97589	8.78556	7.31495	5.61883	2.06129	158.835	159.572	145.267	16.344	24.0624	25.5967	27.1872	29.5216	28.9253	30.1429	24.7666	27.0898	36.9386	33.9011	39.0119	0.00684437	0.319437
FBgn0030241	feo	278.015	293.461	404.601	167.199	175.527	183.457	88.9934	98.4114	136.249	516.976	402.132	342.267	126.453	150.683	153.898	151.53	163.692	159.077	164.467	154.7	148.202	267.933	256.897	253.257	0.00684593	0.331586
FBgn0035871	BI-1	472.032	339.307	300.894	112.275	137.111	154.881	122.182	84.6223	85.3913	1339.88	1441.43	1471.62	91.0092	90.1529	91.9082	99.8498	103.785	103.005	106.516	95.7229	94.4512	118.333	89.1649	113.392	0.00684798	0.262711
FBgn0036286	CG10616	51.595	90.2056	71.478	22.7806	19.8604	30.4159	15.1428	14.5891	11.0946	382.818	403.306	392.994	42.2306	49.0312	49.9265	54.5671	62.9518	59.7052	66.9753	64.4319	57.3367	85.8505	77.9094	79.7206	0.00686877	0.191423
FBgn0037018	CG4042	18.0091	18.3643	23.1832	9.81374	9.08919	11.0599	4.71522	6.18137	10.7478	71.535	80.9113	58.3391	42.6515	49.801	46.1431	59.5524	54.3577	60.5761	64.247	61.6815	58.2998	74.7923	73.9908	69.2567	0.00686976	0.363426
FBgn0032781	RtcB	101.979	70.3639	77.0914	57.376	41.4687	30.148	35.6973	26.2794	16.1541	72.4405	52.6321	69.689	46.0492	51.4435	51.1161	48.9778	57.5455	56.4811	52.5254	48.0894	49.6416	81.9188	80.8115	76.7693	0.006878	0.313232
FBgn0019949	Cdk9	46.0167	31.676	50.6642	11.8978	19.8457	8.07383	10.7089	15.651	8.82881	84.2116	89.7471	112.938	48.2765	47.2971	47.3974	48.1256	50.5534	51.7968	53.7103	51.169	41.8061	64.5782	64.1277	64.0591	0.00688708	0.274148
FBgn0000147	aurA	158.856	128.187	177.524	90.407	86.4856	104.044	67.0744	82.817	49.901	1039.54	952.969	1054.29	59.2489	69.5867	71.3945	75.137	82.2836	70.6093	89.4269	76.5119	77.4888	145.423	142.995	135.466	0.00688785	0.430061
FBgn0035714	CG8549	53.2873	65.1225	71.6034	22.0397	23.6069	30.4578	23.7494	22.9793	36.6101	37.2488	37.6298	30.482	36.1435	48.5039	47.3276	55.1125	49.9569	54.9095	60.6105	51.439	49.7089	78.8516	96.3134	87.5833	0.00690257	0.438595
FBgn0030629	CG9123	20.5876	14.7844	18.6617	8.30658	14.819	9.40859	2.32603	7.77875	0	114.365	106.01	168.423	10.6932	15.5585	15.7187	18.5595	20.8613	19.0029	18.7309	16.7643	16.2996	14.2764	18.8455	18.4117	0.00695632	0.187009
FBgn0265262	Vha68-1	20.0071	25.708	24.2056	18.305	24.5335	16.8981	6.40035	10.3757	0	21.1545	20.6232	24.5841	0.550596	1.66839	1.60222	1.43481	1.6001	1.53666	2.67161	2.28872	2.53487	3.64334	3.53136	1.48626	0.0069616	0.239929
FBgn0061360	CG33672	40.4506	59.3896	57.0184	26.5371	30.219	11.8935	24.0755	14.9633	17.68	100.644	149.28	109.222	32.1851	50.9037	47.7844	56.3598	66.0724	59.0607	51.5877	70.2437	70.1888	101.163	88.8781	87.1396	0.00696691	0.361592
FBgn0020305	dbe	79.1663	80.104	57.4919	34.89	42.9397	51.0897	30.8133	35.5729	22.0028	381.704	379.088	354.137	38.5355	47.5352	50.8317	50.1084	49.8409	48.4335	53.532	48.7358	44.2027	71.4508	74.558	78.9118	0.00697491	0.40777
FBgn0010747	Srp54k	88.1671	68.161	56.2081	47.2706	38.7733	30.1075	20.1761	24.6435	9.58683	463.102	493.004	470.066	68.4855	81.1392	83.9083	86.2544	91.8096	95.7034	93.7645	91.7512	84.5992	110.819	113.241	112.077	0.00698627	0.255987
FBgn0024191	sip1	53.0012	33.2205	38.8104	11.2777	20.6815	20.3747	13.4809	9.06068	10.274	48.7013	44.5595	44.5748	13.565	15.4051	14.3959	12.5283	13.3304	12.2303	14.3197	14.4382	12.5617	25.2713	20.8576	21.2635	0.00700724	0.262457
FBgn0034086	CG8441	102.04	158.275	114.875	58.6333	68.1742	52.4777	39.2495	29.4819	6.05498	181.031	208.841	217.967	97.157	94.8128	87.3975	111.67	102.976	98.0156	94.7045	100.783	97.1191	72.9019	79.7444	79.4311	0.00701456	0.199329
FBgn0043002	Chrac-14	1139.69	1284.41	943.741	591.848	575.194	692.069	648.397	546.548	467.558	2109.22	2419.64	2320.59	179.892	189.209	192.236	172.869	172.248	161.288	180.576	190.357	180.41	183.394	198.075	213.919	0.00704339	0.49364
FBgn0038055	trus	53.1547	67.6237	78.0722	33.1678	41.1716	46.9009	27.5896	29.7997	17.8907	119.116	108.248	90.2312	39.33	39.3658	37.1596	38.5841	41.2921	38.9412	32.5066	34.268	41.1781	53.9691	50.6434	49.1847	0.00704646	0.378576
FBgn0087040	alphaTub67C	1100.71	802.153	1161.69	626.743	663.695	558.29	500.198	359.055	390.232	532.423	426.128	339.692	683.23	704.822	707.278	693.794	676.267	687.65	660.705	642.335	626.005	606.459	650.037	631.496	0.00707034	0.407721
FBgn0028325	Pdha	358.077	237.015	393.985	169.006	171.705	186.807	103.335	66.7933	76.0252	833.848	712.428	646.995	140.295	162.362	170.573	209.487	208.549	207.446	230.636	201.658	199.532	286.351	319.445	308.609	0.00707374	0.248872
FBgn0033232	CG12159	159.043	125.154	214.794	47.8914	59.086	84.2071	30.0869	35.9895	0	124.351	194.518	153.757	45.9491	48.3872	47.469	39.98	42.9314	45.9794	41.2277	37.9809	45.6613	58.2225	61.2451	56.1423	0.00708293	0.13242
FBgn0005411	U2af50	307.459	230.577	198.255	137.685	142.147	148.948	85.4955	82.7824	61.4178	1318.59	1138.09	1090.68	177.117	193.556	186.261	192.442	212.173	204.623	224.387	187.402	196.35	228.757	217.11	228.396	0.00710272	0.311963
FBgn0039274	CG11920	103.083	127.197	111.579	56.6244	31.8886	41.4046	52.2998	48.0873	9.89766	384.391	445.607	524.188	75.5118	77.0052	83.1493	90.2461	92.2197	93.8696	101.888	97.6648	96.6305	85.49	85.4835	81.0629	0.00712821	0.322602
FBgn0000392	cup	1113.79	1244.42	961.278	862.13	793.286	835.374	711.964	593.075	663.668	1000.81	935.275	799.771	297.672	346.307	344.053	282.672	291.478	296.036	250.308	252.648	250.759	399.168	404.472	377.205	0.00712831	0.593076
FBgn0035901	Pus7	102.202	68.5642	109.582	51.9999	37.5761	59.9443	32.601	28.2929	20.5281	54.5188	49.9291	40.4751	38.7854	41.7978	39.3661	36.1324	36.9549	33.9506	35.4178	35.0624	31.5728	60.7207	61.9949	57.1346	0.00718849	0.290431
FBgn0037743	CG8412	26.6624	34.7303	24.4805	9.41306	14.6612	12.5916	10.5592	7.87316	0	64.0412	52.5711	50.4935	8.16622	12.6187	10.3254	8.93344	9.40564	8.60957	8.31018	6.72529	6.64157	13.0398	8.85397	9.83232	0.00719223	0.214646
FBgn0003076	Pgm1	38.9918	32.1207	44.9872	15.1833	18.7818	19.6601	11.2759	19.2204	6.79805	78.5547	58.4125	42.2525	151.879	149.208	149.25	148.035	151.885	155.877	145.698	141.937	135.882	131.622	144.168	139.298	0.0072087	0.321226
FBgn0034065	Rrp42	26.6181	16.3433	17.683	10.0641	13.2436	7.99948	0	5.17935	0	17.1587	14.2063	15.9736	11.3804	9.10204	10.3457	9.11185	9.79025	8.03261	7.08069	6.40236	9.2657	11.2545	10.3431	9.71541	0.00720953	0.0854052
FBgn0263106	DnaJ-1	274.741	223.99	217.994	110.717	142.257	146.248	103.256	144.6	83.6876	1746.55	1591.39	1489.65	76.2338	106.134	104.068	118.629	139.707	139.483	166.964	136.609	141.24	264.2	271.588	262.411	0.00723005	0.462582
FBgn0026761	Trap1	23.1791	27.3787	34.7243	13.6786	20.0585	13.6574	12.7756	8.77116	8.56998	140.836	166.607	128.676	38.4732	41.765	41.8245	48.9519	49.9305	53.315	61.9083	51.4717	50.7989	98.1983	99.3833	93.6409	0.00723045	0.353142
FBgn0032171	CG5846	24.8217	34.3695	29.4318	10.7023	16.2291	20.9264	5.10645	14.9025	7.71915	14.0143	10.8218	9.23001	15.95	26.9185	23.6672	27.4613	27.7189	26.6847	35.1026	26.8823	29.6058	38.6255	42.6867	38.6336	0.00724758	0.312877
FBgn0036030	CG6767	93.292	122.815	101.637	92.4192	79.7144	89.9388	45.8233	35.9913	61.5838	865.885	999.636	1023.13	108.42	118.24	113.894	175.83	171.573	178.142	208.248	189.897	195.274	196.334	170.183	175.735	0.00726347	0.451301
FBgn0011760	ctp	163.677	257.07	135.265	0	0	0	0	0	0	2107.44	2730.14	3037.15	133.66	182.965	203.151	242.349	266.301	265.309	283.516	246.738	258.468	607.935	613.515	628.647	0.00729529	0
FBgn0035519	CG1309	180.612	138.392	102.78	63.4413	76.2309	81.0462	32.7114	23.6333	21.9698	208.9	201.954	177.284	43.9028	47.9768	51.3606	49.2493	48.8964	51.4462	49.928	42.2011	41.5288	87.0058	80.7914	78.199	0.00731083	0.185675
FBgn0032321	YL-1	34.8654	64.5678	47.8366	19.3045	17.326	13.1478	2.69995	0	8.89168	307.457	278.312	320.822	24.728	36.0847	32.9881	33.5817	40.4216	36.3726	35.9143	37.3663	33.0376	61.0666	60.2061	62.3408	0.00733293	0.0787102
FBgn0032404	RpL7-like	151.139	185.898	135.061	85.0291	88.0134	101.642	77.4375	86.2036	78.6907	258.283	249.981	247.551	372.555	361.371	350.783	350.779	385.385	374.405	352.163	386.59	372.571	169.15	203.126	204.205	0.00737317	0.513308
FBgn0004654	Pgd	143.726	112.077	128.712	98.2645	101.201	88.5008	77.1774	51.466	73.1034	56.5073	81.8964	90.5344	119.113	130.397	123.705	130.519	130.163	139.111	137.448	129.311	127.046	259.995	278.704	275.084	0.00737847	0.52468
FBgn0037688	CG9356	21.1229	33.3587	24.6581	5.88308	13.3598	12.746	3.60992	3.4398	9.54382	84.8603	74.5375	95.3745	33.2838	36.5626	38.2638	41.5885	47.1924	46.4286	47.6217	41.8085	45.2779	65.3773	68.4325	68.506	0.00738282	0.209674
FBgn0005593	RpL7	702.719	532.079	810.923	479.303	435.43	442.629	291.105	273.514	232.953	868.761	820.132	660.694	5656.88	4834.98	4710.64	5103.42	4550.35	4736.09	4950.48	5189.54	5288.84	2108.41	2084.64	2183.38	0.00741474	0.389874
FBgn0027567	CG8108	124.365	184.126	145.276	59.6406	71.227	68.8371	51.629	53.6681	70.4391	1173.03	1255.05	1321.95	68.5703	95.0257	101.835	94.534	113.487	104.905	123.887	103.814	103.14	280.734	246.013	249.84	0.00743316	0.387283
FBgn0032949	Lamp1	862.851	864.682	592.769	538.252	428.901	489.933	271.939	354.309	281.268	1835.97	2079.11	2396.34	189.778	253.636	254.865	296.792	320.222	315.102	316.818	282.811	286.851	505.929	517.421	498.535	0.00744181	0.391119
FBgn0020370	TppII	231.981	209.841	230.699	177.536	165.248	192.756	184.45	157.674	171.874	790.047	789.3	596.236	167.69	182.076	183.726	178.004	185.422	172.976	174.892	168.059	159.303	229.923	200.618	197.989	0.00744601	0.764284
FBgn0038016	MBD-R2	76.0521	96.1958	69.8013	57.794	53.5271	45.5676	43.0739	29.2542	25.2462	32.5244	37.2872	32.5421	53.347	55.4403	55.3081	39.7086	42.0011	42.9143	38.3133	37.7756	36.146	71.6729	77.3412	72.2964	0.00746302	0.403118
FBgn0027582	CG6230	20.766	31.1628	25.7154	6.78434	10.8218	16.3036	10.0151	8.5595	2.61305	221.455	214.203	179.282	20.8913	26.0009	30.3064	26.4527	31.0403	31.14	30.386	28.507	25.9856	58.2942	55.4892	58.3768	0.00746674	0.272881
FBgn0034379	CG15073	20.4927	27.5465	31.6092	13.9982	10.3796	10.4169	9.14653	6.73826	0	3.37863	1.28736	0.524836	17.3613	16.6617	17.4689	14.9266	16.9516	14.1039	15.409	10.5552	11.9907	21.2563	21.3637	19.7932	0.00746761	0.199437
FBgn0027055	CSN3	55.0012	54.583	31.8507	16.7017	40.6445	24.2793	0	11.9598	0	168.012	285.279	292.485	57.7812	64.566	64.5528	64.8845	61.9644	58.4538	61.9289	58.5883	58.566	96.2064	93.6624	92.8496	0.00746921	0.0845607
FBgn0012058	Cdc27	57.312	66.0683	51.9284	38.0396	52.7933	40.529	37.7701	35.6132	29.3299	160.997	157.248	127.024	55.4857	59.9934	59.2382	50.7753	58.6204	55.6653	59.392	48.6993	53.3133	103.195	101.86	95.4099	0.00747022	0.585899
FBgn0015622	Cnx99A	27.2783	36.8912	20.5587	22.2828	20.0605	23.1566	0	6.52546	0	148.039	147.232	116.16	51.8549	74.4549	79.4752	105.547	113.229	116.457	133.183	119.798	121.907	224.789	229.837	213.249	0.00749645	0.0770163
FBgn0032925	CG9246	174.184	233.196	148.89	62.3292	72.3211	72.0918	52.3385	54.6606	67.9662	706.177	780.874	799.433	66.0827	83.8731	87.2516	55.3002	65.202	62.6909	57.3938	50.4022	50.5174	132.153	109.834	116.932	0.00751882	0.314534
FBgn0263391	hts	135.652	157.808	122.906	89.1977	145.321	106.226	72.4328	68.9556	91.0222	292.522	321.416	403.05	62.8256	85.253	83.6126	91.895	98.1603	104.476	103.697	101.42	97.192	162.176	162.452	159.997	0.00753411	0.558188
FBgn0039172	Spase22-23	404.941	398.565	265.402	131.164	141.129	183.125	137.768	129.314	107.232	911.454	996.768	851.183	133.604	134.652	139.205	157.019	152.598	163.836	147.591	154.54	148.024	139.272	157.909	167.298	0.00753827	0.350184
FBgn0021979	l(2)k09913	310.203	247.733	394.738	116.086	119.405	114.394	67.3402	98.3369	115.393	2496.11	2168.64	2251.81	102.405	116.404	121.369	112.412	121.186	117.599	122.636	118.823	121.094	125.547	120.009	143.293	0.00754035	0.295033
FBgn0033260	Cul4	57.5303	79.4852	56.8244	33.4187	52.896	38.6509	30.2881	18.2565	16.5008	52.5028	74.9945	67.5188	58.731	56.1901	53.5606	55.6725	58.1867	54.1363	57.0516	54.817	47.4153	110.778	103.399	96.4282	0.00755957	0.335562
FBgn0032732	CG15168	436.934	675.013	600.247	211.436	147.668	202.936	80.5799	216.951	0	1149.08	1471.3	1653.37	112.956	120.806	116.672	134.832	138.738	135.208	153.705	141.439	164.936	194.734	200.028	194.979	0.0075733	0.173772
FBgn0011715	Snr1	102.219	114.59	143.413	50.6547	45.4053	47.3221	60.2832	60.112	48.6949	1256.01	1143.68	1211.04	84.7816	102.96	102.587	117.557	114.638	121.581	118.435	115.674	123.033	116.788	120.817	138.03	0.00759413	0.469405
FBgn0039125	Ndc1	149.175	139.306	213.022	74.164	64.8013	71.3302	54.235	46.369	53.6402	275.318	210.931	219.906	60.2827	69.3116	67.7536	57.0875	57.0254	56.0514	58.0169	55.9792	55.246	102.636	85.6661	82.6764	0.00759466	0.307563
FBgn0030239	CG17333	53.9401	64.1107	70.1175	26.6376	22.1097	57.6036	5.08689	12.7488	31.8972	102.417	68.8619	96.4773	47.7175	39.5372	43.8119	53.9322	48.022	55.1369	62.5881	49.1466	52.9297	76.5843	65.8399	66.9167	0.00759642	0.264299
FBgn0034405	Jheh2	27.7508	25.5186	35.7552	15.3981	17.0481	11.8209	14.6532	8.80128	12.5649	133.656	109.724	130.438	39.1322	40.6257	43.44	47.6097	49.066	45.8504	50.5755	44.4249	45.7401	76.0149	78.7516	83.1936	0.00759967	0.404601
FBgn0037644	CG11964	25.7678	32.7998	31.128	21.3609	20.0006	8.24103	13.12	6.95907	16.6858	66.4131	63.3264	39.3032	54.9529	53.9023	54.1894	48.9706	53.5621	51.1098	56.3427	51.6739	50.3372	68.9115	68.2227	65.2537	0.00761649	0.409885
FBgn0035437	Strip	17.6431	22.2633	20.5646	8.7331	12.6918	12.4336	13.9902	12.0412	12.4558	358.211	300.372	300.827	23.1774	31.4168	32.3955	41.1821	45.8125	46.5136	52.8261	45.5556	44.5831	85.4369	74.263	74.144	0.0076379	0.636457
FBgn0034346	PIG-O	24.4176	34.418	25.2973	9.99505	12.3333	12.3388	8.67499	3.56238	11.9417	26.6136	24.1748	24.3789	18.8338	22.5035	25.0423	18.5608	20.0862	19.3458	18.8973	15.8659	17.4071	44.1611	42.7613	43.1246	0.0076494	0.287391
FBgn0003231	ref(2)P	194.226	185.325	142.294	85.2192	85.0339	101.978	79.4841	55.3788	94.2629	1133.85	985.917	1136.73	102.07	131.096	137.064	171.405	181.391	187.095	204.731	177.589	178.096	220.46	207.185	211.65	0.00765445	0.439069
FBgn0004828	His3.3B	9371.19	7435.98	9530.87	7666.82	6900.91	6516.13	5322.41	4344.35	5413.8	12032.1	12185.2	14006.1	981.028	973.51	952.347	1128.82	1122.34	1083.4	1037.59	1033.22	973.833	1476.86	1407.18	1467.38	0.00766015	0.572577
FBgn0039158	TBC1d7	73.7598	76.0916	43.9781	28.7765	30.1112	27.2806	17.3088	7.55469	7.47201	79.4239	112.513	127.964	33.0993	36.3847	34.8396	33.6962	36.3334	33.9756	41.1028	29.8964	31.4417	46.2373	42.2706	43.9538	0.00767638	0.166824
FBgn0031776	Pfdn1	189.484	311.539	339.924	103.494	67.911	117.366	45.3748	59.0767	0	531.821	597.554	618.166	168.915	164.184	179.074	192.132	198.436	203.314	210.548	197.18	181.703	241.05	249.833	249.169	0.00769841	0.124207
FBgn0283659	THG	61.469	84.739	90.3022	24.6099	45.5565	39.2698	21.5744	29.4686	0	64.203	72.5313	79.083	26.5961	32.8556	30.4573	27.4211	27.9389	22.7252	23.8163	21.8451	22.2079	26.173	20.4122	20.123	0.00772343	0.215817
FBgn0051053	nenya	47.8905	56.0713	41.0707	11.8965	25.8912	26.2579	25.8229	24.8823	16.6523	96.68	96.9708	129.819	10.0684	11.0926	9.44734	13.1115	9.40899	9.50829	9.23218	13.2432	10.1735	16.8333	14.178	15.6104	0.00772493	0.46443
FBgn0032849	mRpS18B	69.9364	85.0495	93.3095	22.6219	58.927	42.8627	15.936	38.3209	0	136.091	161.471	163.311	64.8226	76.0499	78.5869	78.0142	80.5354	77.3096	90.7907	82.9974	82.7975	86.0914	106.917	104.092	0.00773104	0.218517
FBgn0039302	Nup358	269.47	289.405	215.363	119.197	113.507	160.589	150.893	127.415	148.767	1123.34	1121.7	1035.46	123.172	152.196	154.023	124.813	129.821	122.738	100.606	89.5398	88.8941	320.209	255.745	249.111	0.00773499	0.551605
FBgn0037144	CG7458	22.0463	20.5124	16.5193	14.7655	11.4121	14.1454	11.9397	9.60956	11.0724	63.2291	77.6879	96.2701	34.0129	38.826	39.6316	49.7817	52.3635	50.5143	51.7448	49.3893	48.5762	68.5507	71.76	72.8822	0.00776981	0.552181
FBgn0033921	tej	17.8524	23.8017	33.388	2.83618	5.55698	2.91756	2.35872	3.69464	0	148.768	204.391	219.71	33.7915	39.2969	42.5545	42.3957	47.4888	44.6412	47.7544	45.0444	41.588	81.8977	64.7989	64.0289	0.00780201	0.0806662
FBgn0022699	D19B	16.3996	20.9211	15.8028	8.46733	12.2097	12.6011	8.13162	9.02107	10.2875	81.1429	86.6684	81.4105	16.775	19.9762	19.2505	18.6405	18.9396	20.3692	20.6449	18.8423	19.8537	40.6379	39.5453	40.362	0.00781109	0.516535
FBgn0034697	GM130	14.8074	24.3912	25.5904	7.71017	10.6434	9.8217	4.67755	5.39556	3.6094	81.4257	81.0591	81.9161	43.048	48.2284	48.9398	45.678	50.9417	50.8574	46.2075	40.4727	40.8385	71.0567	65.2767	66.4965	0.00783949	0.211186
FBgn0030891	Ada3	39.1775	39.0823	43.3135	30.7582	35.8642	29.3597	29.4138	20.8854	18.7036	100.16	102.845	135.998	15.1344	25.761	25.9728	31.8665	30.6218	35.2657	39.0436	33.5203	33.0965	75.9119	75.647	73.65	0.00786074	0.567582
FBgn0039451	CG6420	5.06851	7.65258	3.78826	14.7973	12.3409	10.4328	13.4853	13.8333	18.538	27.0699	31.4089	30.2667	19.9486	22.6734	22.6121	29.7886	34.6784	34.5503	43.3047	36.9544	37.0784	95.9988	92.0757	91.0233	0.00790467	2.77761
FBgn0029971	ND-MNLL	144.578	150.483	207.841	107.654	97.9718	147.271	69.8993	70.9238	59.6106	947.464	1263.1	999.755	241.691	229.388	219.095	254.442	260.346	273.972	295.358	252.421	278.4	280.03	307.022	319.83	0.00793495	0.398554
FBgn0013681	mt:ND3	500.825	1019.55	783.373	64.6112	54.578	75.2834	36.5771	35.1397	18.989	480.727	606.575	570.81	304.236	539.525	607.719	202.684	212.934	172.88	162.689	182.118	158.027	639.248	476.353	551.997	0.00795032	0.0393732
FBgn0033683	CG18343	29.1779	37.4154	42.7136	41.3107	22.9805	22.9007	6.45109	15.3253	0	221.658	300.134	254.183	65.4302	72.1923	66.834	77.7888	64.9993	81.8932	86.8888	83.4384	83.8751	74.3512	83.7794	85.0683	0.00795933	0.199222
FBgn0037891	CG5214	141.801	105.336	106.985	73.1101	88.0262	77.4155	60.7272	38.003	53.9364	444.704	359.63	359.01	102.663	101.053	96.548	116.645	112.907	112.785	128.645	127.02	123.604	140.225	146.886	141.005	0.00796191	0.431113
FBgn0042693	wrd	237.864	316.205	207.274	140.594	204.19	178.178	101.579	90.358	64.129	146.566	174.996	220.769	111.295	123.712	126.548	118.256	125.493	128.118	134.563	112.851	116.246	216.702	212.874	209.975	0.00797011	0.336335
FBgn0015019	CCT3	541.002	503.699	768.691	312.133	296.253	289.402	183.789	165.704	220.469	1035.64	797.834	711.894	355.397	357.524	349.133	361.98	389.959	382.636	396.376	371.925	370.08	422.169	450.14	432.994	0.00797121	0.314307
FBgn0035227	Iml1	16.536	11.3922	15.9954	10.6803	8.14387	15.4975	3.34248	7.06371	4.56843	27.241	26.1852	22.1406	17.687	17.339	17.2743	12.8406	12.7175	14.2083	12.096	10.0807	9.84785	24.7524	22.2392	22.3364	0.00798523	0.340924
FBgn0025637	SkpA	364.104	550.05	385.25	167.43	152.212	178.553	135.82	161.027	116.015	3790.14	4761.92	4961.06	217.449	262.794	264.179	299.47	348.663	355.114	324.504	319.718	311.734	450.773	470.677	515.445	0.00799364	0.317732
FBgn0026259	eIF5B	39.6411	28.0438	25.5616	13.3289	17.7759	17.7341	8.86927	10.9362	8.744	284.864	243.68	197.686	33.816	39.9922	41.8848	44.6009	50.0991	48.5858	48.2392	42.1109	41.8733	102.418	88.8585	85.441	0.00801636	0.306172
FBgn0032236	mRpS7	90.8538	108.076	70.4501	26.2704	25.8201	29.4632	37.3291	21.4984	8.12837	241.551	283.711	286.851	94.1395	120.691	123.999	133.924	129.341	139.752	156.036	144.323	146.578	193.406	207.983	197.166	0.00803365	0.248555
FBgn0030802	DENR	184.882	207.088	301.135	44.9429	91.3454	125.56	59.8638	46.0217	0	544.527	496.801	655.517	123.629	150.218	136.271	151.341	144.253	147.257	158.291	149.653	145.83	189.821	167.444	170.307	0.00805509	0.15277
FBgn0000150	awd	4583.39	4009.94	4093.1	2889.41	3987.63	3078.51	3081.93	2460.47	3095.92	17223.1	17246.6	13185.9	3591.97	3068.05	3133.76	2623.4	2456.15	2601.3	2222.68	2415.55	2406	2246.76	2614.38	2692.85	0.00805783	0.68091
FBgn0010269	Dsor1	42.7471	56.975	43.6528	29.096	47.9276	30.9546	25.1541	18.6752	25.0295	52.4426	44.434	45.7559	37.2779	43.5987	45.4581	54.1276	56.3253	59.9764	62.8628	58.0031	55.8752	105.189	113.235	109.213	0.00806159	0.480271
FBgn0038454	CG10324	32.8244	37.5125	24.6564	9.2133	10.4423	14.5949	8.72641	11.4083	0	47.2328	52.4379	56.1043	13.1087	16.3447	16.9492	13.8224	13.2288	11.3015	10.867	10.5397	11.3552	25.5688	25.5698	23.6705	0.00806452	0.211959
FBgn0037981	Spt3	29.5504	40.3944	29.3776	27.6385	32.4489	40.3534	16.1489	13.9217	10.4199	78.3326	78.0039	99.0523	11.5	17.341	17.7886	15.0555	15.8214	17.8736	12.3123	18.3775	17.3936	16.3953	18.1087	18.5943	0.00807948	0.407668
FBgn0028686	Rpt3	754.484	716.264	1002.81	528.431	484.751	604.264	362.377	334.496	158.113	2092.6	1689.56	1691.51	187.604	229.816	225.033	202.657	205.773	217.413	217.122	203.646	193.822	231.148	223.961	231.12	0.00808439	0.34565
FBgn0038640	CG7706	53.7746	48.0894	42.3633	27.8882	30.5777	28.2552	26.4618	26.2047	13.9202	139.07	130.855	122.532	21.9835	25.0339	25.3782	21.4282	24.1244	20.7392	18.3283	18.1214	18.6593	38.7068	37.5306	36.9969	0.00808536	0.461678
FBgn0038118	timeout	89.7771	117.287	96.9304	60.0419	70.7983	70.8411	50.9689	48.0626	64.0746	162.756	150.907	151.432	44.8569	46.123	47.1916	34.1567	34.2274	31.4159	28.7219	25.9548	24.3511	46.8235	39.2949	38.2732	0.00809114	0.536543
FBgn0028646	aralar1	88.0848	100.681	92.0721	88.0177	89.025	81.2353	54.7101	58.7659	31.5476	233.688	222.902	177.369	56.8219	75.513	78.1577	78.1082	77.5723	77.8436	79.5973	76.8579	71.9661	114.539	120.496	120.209	0.00809909	0.516397
FBgn0041186	Slbp	84.6281	112.891	74.6411	52.7429	49.6131	57.8733	38.5912	27.3992	19.4659	99.5453	107.898	75.3394	108.052	144.103	144.301	183.056	202.223	191.468	187.85	184.616	189.447	236.209	275.913	264.009	0.00810197	0.313993
FBgn0037554	DNApol-iota	29.1779	32.1972	38.7805	24.5261	19.9701	25.6534	13.1383	17.0079	5.58422	55.3295	59.7895	61.1615	38.1647	38.5255	41.8277	55.9825	57.8594	60.9298	65.9483	61.1644	58.5134	89.5771	79.9982	79.1796	0.00810403	0.356748
FBgn0041180	Tep4	12.6066	9.87734	12.3489	5.79062	9.24094	8.58078	7.60538	6.31553	5.67031	15.4328	15.9771	8.11641	6.11923	5.66598	5.38302	3.90002	4.04366	3.79764	2.85809	2.60004	2.70436	3.79562	3.64882	3.09702	0.00811539	0.562436
FBgn0036818	CG14074	57.1596	40.7031	40.2564	21.9094	17.5266	26.0673	16.6164	15.3905	3.16426	41.3863	32.9974	56.8173	10.9149	15.1934	12.256	14.4932	14.9984	14.5031	14.2533	11.4309	12.121	25.1331	29.309	27.2136	0.00813806	0.254643
FBgn0034753	CG2852	4093.95	3267.71	5326.01	1788.26	1817.71	1752.35	979.399	1139.91	1512.78	10117.4	8130.38	7492.57	1886.82	1733.46	1856.65	1696.31	1621.45	1646.24	1517.09	1633.09	1610.5	1148.17	1147.08	1232.15	0.00815993	0.286269
FBgn0039120	Nup98-96	73.1644	75.8309	65.3848	46.0784	51.1096	48.9466	41.8402	37.2788	17.7313	612.767	710.86	500.62	46.8401	61.1799	63.1491	65.7186	70.8826	70.8128	80.9649	66.9454	62.9548	175.911	160.048	163.646	0.00817086	0.451769
FBgn0039132	AP-1sigma	192.845	112.957	122.811	71.1375	60.9916	71.2066	30.9685	0	0	501.811	474.961	598.746	142.069	136.489	144.617	160.378	172.034	168.559	170.33	182.342	182.191	205.419	187.908	202.649	0.00818498	0.0722527
FBgn0024921	Tnpo	172.244	211.273	171.104	139.384	161.13	166.088	120.758	101.708	119.353	2310.32	2266.21	2258.52	99.7118	128.168	131.791	193.76	202.165	189.025	211.505	204.403	192.391	236.556	201.323	214.557	0.00820265	0.616312
FBgn0051717	CG31717	128.251	130.509	185.41	55.1535	70.1738	84.862	41.4058	39.3727	65.0064	123.925	119.352	114.922	62.1889	52.1853	64.8683	66.1864	53.1915	53.6256	55.3481	64.658	59.8464	52.4965	49.4167	50.7122	0.00821326	0.328219
FBgn0015618	Cdk8	66.2326	103.42	90.9879	38.6156	35.8609	44.0299	28.5205	29.9309	37.455	81.3426	103.973	89.5414	39.5423	42.3567	41.2978	37.969	36.5784	34.6213	34.4759	31.2868	31.5095	34.8218	37.306	39.3605	0.00822139	0.367964
FBgn0265297	pAbp	96.671	102.557	109.107	177.196	211.69	179.231	178.916	159.591	215.642	719.095	674.256	583.217	495.649	597.239	601.775	860.066	882.203	884.798	933.092	908.235	884.509	1020.3	1076.36	1088.46	0.0082214	1.79723
FBgn0015905	ast	20.7675	14.8846	16.8063	6.14876	15.564	11.6942	7.5267	8.38063	3.72148	21.5196	23.8509	17.3187	21.806	26.4661	27.8648	28.4505	32.517	30.2334	29.6656	28.9445	25.6234	47.3015	47.4112	46.2145	0.00822322	0.374179
FBgn0033698	CG8858	73.2519	72.9697	82.2584	48.8453	43.9365	51.0229	49.2459	34.4974	52.467	17.2029	15.9816	10.4465	41.0549	41.859	41.4875	30.6532	30.3024	29.0014	24.3499	24.2385	22.2202	57.1271	45.7658	42.5301	0.00822638	0.596158
FBgn0015781	P5cr	35.9782	31.8557	19.4313	9.7736	17.5943	25.8731	6.3645	3.48946	0	105.979	95.1835	92.1152	35.4991	39.8404	41.0656	42.8514	41.5925	44.0913	43.3775	41.4709	44.5702	50.1919	59.0051	55.811	0.00824178	0.11292
FBgn0030122	Aladin	234.819	179.665	204.747	147.811	171.432	157.602	128.177	79.4681	101.213	188.975	174.165	166.604	89.7048	99.2762	95.8641	78.9329	86.1323	87.0085	82.0283	77.144	78.5899	119.682	125.02	124.198	0.00826287	0.498776
FBgn0038947	Sar1	91.6789	129.486	93.8494	40.8113	85.6439	94.676	0	42.3926	0	819.703	854.167	824.238	109.524	124.501	132.471	160.78	168.66	169.718	182.405	183.713	191.215	207.683	237.334	232.053	0.00829097	0.134573
FBgn0015270	Orc2	168.268	139.603	114.249	56.5364	73.9242	72.3613	40.4037	68.901	55.7364	35.2767	35.6606	40.0817	64.1811	72.6573	78.2398	64.8616	68.5132	67.5232	64.552	58.3734	58.8901	108.114	111.772	104.238	0.0082973	0.390981
FBgn0033528	trsn	416.23	235.737	272.141	113.843	125.957	110.098	39.6374	33.7467	46.4097	245.786	231.983	201.022	77.6961	70.2197	78.7054	69.2399	67.9031	66.9376	76.462	66.5895	64.8066	84.1039	84.051	79.6412	0.00831311	0.129632
FBgn0038922	Idh3b	100.288	143.292	116.67	44.3228	52.1376	61.3124	51.0131	51.8252	20.2071	1214.94	1222.96	1062.22	79.7604	91.8129	97.8416	124.632	120.534	120.996	134.568	126.732	132.282	138.988	128.971	141.371	0.00831422	0.341555
FBgn0034933	CG3735	34.758	42.2824	30.6285	14.4548	13.2172	23.2355	9.24144	15.6713	0	116.72	138.997	155.44	27.7783	31.4778	32.7854	29.8292	31.7375	31.0316	27.0504	28.1705	25.048	64.9836	52.5464	57.9021	0.0083274	0.231383
FBgn0036740	Vps60	216.231	200.232	105.195	32.6663	118.962	116.568	0	13.4617	0	169.903	128.033	145.51	60.4758	61.9475	57.5552	57.4053	56.9527	60.0522	52.8119	56.9642	52.9791	98.1652	85.9509	84.9335	0.00835312	0.0258057
FBgn0003870	ttk	4.08788	6.18846	3.47029	5.98136	4.9031	11.3669	8.40041	8.97391	8.56356	74.1241	77.7771	64.7549	11.9564	21.3109	21.9627	30.4537	43.293	39.3355	49.4226	41.5558	41.7089	145.343	151.413	143.855	0.00841975	1.88686
FBgn0038601	CG18600	54.5982	56.7979	51.4377	23.9306	40.4304	33.3901	37.6628	28.009	20.1016	346.821	354.793	390.446	52.2333	51.0505	53.5484	59.721	59.8026	58.753	62.2844	58.2058	53.7442	68.8277	60.3538	61.8454	0.0084202	0.526754
FBgn0021795	Tapdelta	217.395	204.606	293.99	126.319	137.771	126.291	67.2167	104.411	27.8591	822.142	709.602	511.969	160.441	166.733	151.305	166.823	182.247	189.276	200.837	195.52	203.725	154.657	171.206	177.775	0.00842348	0.278616
FBgn0037011	CG4858	40.02	25.4311	22.9921	0	14.2697	10.9967	6.0221	0	0	36.3224	54.9426	45.9529	12.7006	11.8209	11.2895	14.4655	12.9541	9.57405	14.9408	7.37222	10.5061	16.6204	16.1271	20.5131	0.00843262	0.06809
FBgn0031769	CG9135	806.824	748.686	539.566	251.127	231.262	507.387	128.772	327.247	146.599	1419.79	1323.39	1099.51	244.931	271.811	276.035	248.494	252.89	252.221	241.232	217.16	236	309.598	310.602	306.552	0.00845529	0.287636
FBgn0023513	CG14803	65.9444	70.1076	71.7453	46.7253	63.229	56.501	42.9125	35.2122	52.6066	98.5616	86.7871	102.796	55.7139	58.6592	59.1407	59.6469	57.2309	57.9786	53.6794	51.2698	51.4626	80.4634	72.7371	71.0896	0.00847099	0.629129
FBgn0015371	chn	76.4592	66.2322	67.628	65.5754	80.6372	71.7065	54.9878	45.5985	47.3288	100.676	95.9804	94.221	57.1067	70.1837	69.5254	77.7802	82.1827	83.8949	84.8354	77.8072	75.248	197.331	200.802	186.448	0.00848268	0.703288
FBgn0260648	Rrp40	68.9931	96.1453	93.3314	39.6528	29.3436	33.2223	27.0844	38.4163	45.7287	223.921	195.137	186.462	29.007	32.2109	29.8298	27.0313	27.6515	28.2816	31.6863	28.6807	32.7448	35.6245	40.579	40.1921	0.00852831	0.430338
FBgn0259676	DNApol-alpha60	123.775	86.3697	127.585	90.41	80.9852	65.5645	47.7361	42.0721	52.7424	79.0408	80.1974	57.0118	62.9938	65.9765	71.4098	68.4584	72.9332	70.0413	73.6769	71.8397	66.661	101.906	106.985	93.567	0.00854084	0.422085
FBgn0031263	Tspo	327.619	283.594	442.657	204.529	196.422	165.105	118.142	78.8547	133.015	1028.15	833.207	673.817	162.629	167.381	175.977	167.889	168.757	192.775	182.641	195.155	203.572	193.909	216.746	218.24	0.00854411	0.313142
FBgn0044030	mRpS14	45.0986	38.0917	59.078	18.5735	18.7311	0	11.2667	19.3002	16.348	205.263	230.718	206.862	46.1846	55.6775	66.0956	89.0203	75.2146	82.9514	86.1756	76.9	79.632	105.294	97.804	89.285	0.00854767	0.329763
FBgn0003941	RpL40	1493.95	1310.8	1491.24	1219.89	1388.46	1195.99	792.54	804.127	1080.88	2110.52	2424.87	2790.15	5737.26	5169.76	5081.32	5319.7	4922.51	4743.48	4520.71	5141.59	5349.67	1888.38	2000.85	2107.97	0.00855461	0.623265
FBgn0039259	CG11781	248.849	115.416	194.788	56.5677	59.3934	39.7706	0	0	0	446.283	495.319	567.546	63.6545	62.8114	63.6688	70.0968	69.9926	68.4289	72.3743	63.0335	75.1627	114.953	115.122	108.11	0.00859047	0
FBgn0027507	CG1344	46.401	72.261	74.7794	26.1843	30.6452	28.688	20.5114	22.0542	10.9802	315.913	376.359	389.312	38.1438	51.2137	51.3021	53.3948	63.2468	54.35	57.2536	51.8936	49.895	111.327	94.8997	97.9315	0.00862521	0.276806
FBgn0000083	AnxB9	185.978	152.266	239.049	94.9213	100.628	99.4557	65.1122	44.9723	78.0845	849.583	799.019	859.393	56.894	62.3367	61.2161	52.1518	57.9551	51.1968	64.1914	52.8981	49.2013	85.9343	91.025	95.2537	0.00866025	0.32595
FBgn0024285	Srp54	247.554	220.601	191.307	137.831	189.777	151.65	134.515	92.999	130.523	743.054	740.98	788.792	176.05	188.118	177.009	173.72	187.635	182.674	177.187	173.871	172.677	125.708	125.284	137.972	0.00866542	0.542923
FBgn0036008	CG3408	67.2454	45.8127	63.3359	35.5648	30.8242	32.5927	19.2441	24.3162	29.3144	88.3229	72.3012	61.4602	56.0464	62.6252	65.2482	77.6025	74.1848	72.4151	79.9401	79.9528	78.2088	83.8145	80.1151	76.3364	0.00870675	0.413136
FBgn0035149	MED30	112.683	74.175	103.696	77.0066	36.9823	50.6281	40.9123	26.4033	41.6303	52.5322	51.4742	47.832	24.5367	23.8581	25.99	24.2568	27.0173	27.2434	29.7073	25.3513	23.4187	33.471	39.1068	39.0629	0.00872787	0.37496
FBgn0037022	CG11396	72.581	86.2556	86.0881	34.7177	16.5243	26.7992	28.6681	26.9632	52.8384	2.65591	3.36644	3.61388	43.7737	56.5329	55.678	47.4388	58.0511	51.0147	47.3531	55.3652	55.9807	55.2456	71.7819	64.7228	0.00873997	0.44287
FBgn0001942	eIF4A	1924.87	1553.51	1850.69	1511.44	1877.01	1557.98	635.488	1130.41	587.704	2980.74	2816.69	2972.94	3402.8	3026.51	2871.13	3158.29	2972.87	2980.53	2948.84	3097.42	3046.3	1483.29	1502.53	1562.46	0.00874623	0.441654
FBgn0004404	RpS14b	873.597	545.572	875.34	432.349	603.885	561.106	104.415	265.764	0	346.421	422.235	606.857	3024.7	2030.69	2004.84	2095.02	1915.99	1896.83	1958.08	2273.72	2163.04	832.277	898.343	879.826	0.00876497	0.161333
FBgn0027504	CG8878	85.1993	98.3888	120.661	72.3729	49.6293	57.2436	55.7011	38.8027	34.1371	87.663	104.145	101.651	48.5026	52.1372	59.5114	38.4381	43.2025	45.2143	40.4028	39.7121	37.9301	106.365	98.6619	95.9498	0.00877814	0.422815
FBgn0066084	RpL41	13289.3	12682.5	9271.07	9001.52	8257.46	6345.18	5339.6	6071.04	4089.97	4063.19	5979.82	6840.5	4958.22	4689.45	4961.46	4262.8	3679.88	4207.64	3938.67	4614.41	7191.79	1182.75	1358.9	1226.34	0.00880096	0.439823
FBgn0005322	nmd	74.6812	85.946	65.3961	40.2879	19.1496	38.2072	34.2746	31.9938	6.527	579.984	483.185	498.845	119.463	131.586	134.669	171.395	171.596	169.347	198.109	175.426	170.373	211.351	201.27	211.598	0.00880479	0.32207
FBgn0025634	CG13367	239.728	173.654	293.982	119.965	106.118	125.408	79.8586	63.0991	56.2922	10.04	15.1832	15.7389	46.5122	55.5453	55.1315	49.6533	47.4773	48.2368	35.8941	41.0461	39.1487	45.5108	55.1983	51.908	0.00882428	0.28168
FBgn0039858	CycG	53.5598	56.1796	57.1649	106.049	113.924	86.7715	98.3868	79.6282	107.555	554.912	463.937	479.349	288.307	323.575	315.161	428.41	430.414	432.097	477.116	448.526	446.5	523.188	499.782	524.617	0.00882652	1.71098
FBgn0038424	CG17565	90.1171	144.103	138.9	62.0351	46.9257	55.224	40.8596	46.675	31.3498	226.425	247.487	197.444	57.0767	65.7888	57.4943	49.03	54.9943	56.434	50.848	51.3261	43.1273	77.2759	81.9212	79.6852	0.00883711	0.318622
FBgn0040007	RpL38	2066.84	2766.96	1633.02	759.816	764.399	586.324	415.275	660.897	556.747	2083.91	3017.34	2454.36	3980.33	4305.26	4617.25	4694.77	4920.7	4976.91	4857.05	5576.49	4555.92	2323.49	2249.2	2139.07	0.00885092	0.252507
FBgn0035141	Cypl	71.6505	89.0532	62.2965	10.4998	34.4542	27.4565	39.2138	28.0572	34.4421	517.04	483.637	476.346	36.6415	38.9978	33.7498	39.1522	40.2266	37.5317	42.4139	42.5094	41.0662	41.838	60.9109	64.0473	0.00885454	0.456112
FBgn0036911	Fibp	25.1699	36.0013	23.3128	0	53.0464	29.6204	10.1244	0	0	29.1502	37.6779	31.0164	53.1869	50.3797	48.1137	51.8097	52.3586	58.1315	57.226	58.6798	58.1151	69.8289	72.9454	67.8405	0.00886356	0.119838
FBgn0034534	maf-S	248.46	227.746	342.266	148.26	142.324	107.599	51.8042	102.784	103.82	526.475	474.932	626.819	54.7436	58.281	62.9492	64.397	57.3145	63.4321	72.0718	69.2235	66.5929	82.0434	97.5019	93.2303	0.0088833	0.31572
FBgn0085229	CG34200	1205.18	865.307	1173.18	478.693	480.76	439.712	359.939	430.017	0	2219.56	2386.26	2777.09	127.936	126.891	139.932	128.514	149.802	130.21	202.104	142.905	146.199	244.571	209.599	229.804	0.00888333	0.243538
FBgn0031194	CG17598	54.8525	73.1603	76.8745	51.3441	45.7676	42.9479	38.7889	31.359	31.2233	324.394	302.84	260.124	38.2707	49.4771	48.3128	45.1789	49.8096	51.2922	49.9839	44.5575	49.1827	73.1119	67.6074	73.6148	0.0089138	0.494766
FBgn0015571	alpha-Est3	7.28364	7.30619	9.71545	2.4548	4.23817	6.07379	4.43907	2.26746	2.71594	20.8535	14.2891	11.7434	18.5122	20.6475	21.1953	19.1473	19.0876	19.9272	21.5164	15.8966	17.3824	26.1304	27.7207	27.0229	0.00894756	0.387672
FBgn0035586	Fitm	87.2691	69.9594	112.001	50.6592	53.3949	59.8225	30.1056	34.0697	30.1524	103.634	91.0545	90.17	23.7175	29.5353	30.6588	33.3425	32.4399	34.8091	36.3158	32.4579	39.1595	48.7266	51.8051	52.543	0.00896039	0.350362
FBgn0034259	P32	258.784	279.685	190.58	112.885	88.1088	105.328	51.1428	53.1457	120.942	43.7956	47.8223	27.3455	286.219	310.441	305.41	349.019	372.768	370.415	368.818	376.455	380.948	376.715	424.329	391.69	0.00897107	0.308937
FBgn0033557	CG12325	20.2705	20.8881	31.1623	12.5669	6.32526	12.6028	7.99979	6.12711	7.28814	33.7792	41.7122	37.122	22.7179	24.2572	25.5426	26.7525	27.8713	27.83	29.2087	25.2873	23.2216	60.6048	56.5218	53.0845	0.00898619	0.296112
FBgn0032200	CG5676	208.993	261.058	255.086	77.3547	0	62.2628	0	117.981	0	753.806	1007.6	1100.32	131.66	144.913	152.193	155.149	162.304	157.657	179.367	159.443	160.055	294.576	227.207	238.786	0.00898662	0.162701
FBgn0038961	CG13850	10.7389	14.3227	9.62235	2.16645	4.40617	6.99718	0	4.67593	0	137.526	152.937	125.217	39.7803	51.7667	52.3178	64.981	63.9877	61.4545	70.6692	63.1844	61.7272	105.16	96.8538	94.6171	0.00898879	0.134815
FBgn0011655	Med	63.7511	69.5181	81.9514	31.2114	50.3105	41.2044	40.8433	28.5501	44.0587	126.147	112.827	132.014	37.0513	37.8428	38.288	31.1558	32.8283	39.6665	38.206	36.7327	34.7746	42.7727	49.0421	49.5164	0.00902238	0.527143
FBgn0260442	rhea	38.8326	46.7844	43.9207	28.7884	34.5012	30.0081	28.7962	26.0459	17.9907	222.649	218.706	226.167	20.3053	26.1807	25.8457	24.655	28.3371	28.3454	26.6326	25.0312	22.2587	83.3941	68.0494	66.1015	0.00905356	0.562252
FBgn0035207	Herc4	38.3623	36.3527	52.2949	22.0727	17.7314	20.5697	7.50748	15.7598	18.4831	92.383	99.6694	99.7285	21.8104	31.0523	31.9839	31.2377	33.7682	35.299	34.7066	30.4303	31.9623	85.3244	73.7835	74.8656	0.0090667	0.328717
FBgn0037108	Alg11	20.2273	12.9827	20.0087	5.95261	6.88968	14.6581	0	0	6.73895	37.6105	39.6357	42.4285	28.294	41.87	39.454	51.7643	52.9282	53.9669	53.1544	49.7227	47.9711	75.1075	83.9126	78.858	0.00907121	0.126627
FBgn0034691	Synj	20.7154	30.6165	27.0167	15.5784	20.4748	21.5996	13.5232	10.4478	8.72901	13.6168	17.7516	16.9986	16.2483	20.6012	21.3383	24.1441	24.7714	24.9917	30.6799	25.5817	24.0196	53.6617	45.8652	41.483	0.00908839	0.417366
FBgn0034650	NC2alpha	76.0567	104.747	101.468	38.1125	35.5656	34.5892	28.5164	28.8853	52.8361	396.016	358.235	316.86	46.3743	61.2489	60.7466	76.3379	76.2353	83.6311	80.2712	73.3903	79.6439	110.041	123.199	120.096	0.00909909	0.390538
FBgn0266000	CG44774	87.5381	87.8419	96.8837	83.383	66.6399	72.1614	56.6577	43.8139	67.0491	210.982	213.662	180.129	94.3871	110.797	114.603	143.103	161.494	151.799	140.667	132.622	145.235	156.916	158.527	165.782	0.00912445	0.615289
FBgn0031589	Naprt	41.1033	25.5214	31.6784	10.84	17.9407	23.6214	6.37826	12.8024	9.75248	21.1557	30.3298	5.28096	19.3447	23.2511	24.2908	22.2693	21.6024	20.0242	14.8834	21.6438	20.2909	31.9747	30.7166	29.9239	0.00915252	0.294326
FBgn0027903	CG12018	204.474	130.62	182.355	101.029	84.7213	107.597	67.8763	68.6161	70.715	117.047	116.461	113.71	70.1281	75.1238	74.7045	61.4266	65.7023	67.1385	68.0609	65.3661	63.7516	97.6142	102.318	97.3552	0.00915779	0.40044
FBgn0026431	Grip75	106.051	145.762	89.4469	46.2963	60.116	61.6448	30.933	39.8396	19.206	102.499	120.678	137.338	47.5884	52.305	49.2486	42.8304	39.9293	41.9393	39.6561	35.941	34.155	77.5507	58.3337	59.2409	0.00916621	0.263666
FBgn0032160	CG4598	94.5073	82.5492	132.986	60.5532	46.6162	83.2761	13.1603	38.1626	14.1173	243.449	227.951	229.159	103.218	103.428	111.535	116.707	112.479	116.861	120.473	118.059	106.8	155.988	157.225	142.974	0.00917327	0.211068
FBgn0004832	Xpac	59.7421	53.9991	90.5554	31.3862	18.9077	28.8825	7.8301	18.6242	0	26.3107	18.958	19.242	38.5413	32.8907	35.6041	34.4181	35.5522	32.65	37.1664	31.4233	31.9599	38.7155	43.7727	43.2515	0.00919504	0.12949
FBgn0001247	Ide	71.8704	73.8017	40.084	17.9115	35.3948	29.8707	4.7863	14.6994	0	123.166	101.392	79.857	35.1298	37.675	37.4698	29.7529	36.7198	32.8253	29.5461	29.3279	25.5616	57.0931	57.6236	55.4348	0.00921276	0.1049
FBgn0031549	Spindly	95.4782	102.137	80.9741	62.3898	67.6403	61.6278	41.2829	62.2532	39.7564	52.5272	48.5583	28.2588	45.6786	47.139	46.5149	42.4935	41.9324	42.5331	44.049	38.418	36.5519	57.4195	52.4469	52.9435	0.00924421	0.514351
FBgn0030081	CG7246	42.3664	27.0106	31.8726	14.2918	17.4279	25.4728	12.8334	7.56082	12.4766	130.358	117.06	135.299	29.2218	36.1482	35.3349	36.1028	39.3438	41.3927	41.93	38.3782	35.4613	71.3066	68.1664	68.1584	0.00924427	0.324652
FBgn0038206	twf	143.59	93.7897	106.82	85.8787	73.6247	55.485	34.2064	35.0856	50.9615	62.3782	70.5849	55.1942	65.6138	61.9054	57.8189	57.4604	63.7394	63.0698	65.9528	57.9296	66.143	94.5313	100.489	100.854	0.00928968	0.349372
FBgn0030791	CG9132	164.965	157.255	108.457	49.9264	83.3923	111.455	31.7403	57.5417	60.5998	747.266	713.541	549.707	52.2515	54.3348	57.4963	71.4683	62.9974	70.0541	93.3002	80.8827	74.8885	118.735	122.304	122.374	0.00931554	0.348015
FBgn0020660	eIF4B	579.633	962.017	580.849	323.902	239.107	333.198	101.212	126.647	96.3087	225.954	279.943	609.133	292.384	298.189	316.35	265.972	285.051	279.148	282.425	245.901	234.598	498.481	448.707	409.174	0.0093249	0.152729
FBgn0031972	Wwox	15.4922	27.3676	19.533	11.3821	9.39209	10.7418	5.03713	3.80665	0	14.4156	10.7767	26.7053	14.8487	16.5765	16.8632	18.4797	16.3184	18.2852	15.368	14.8093	16.8163	20.5533	22.2048	24.2963	0.00933914	0.141744
FBgn0030499	CG11178	57.954	68.0447	83.8128	42.8494	48.2812	32.2864	35.7751	35.2232	31.4182	43.2647	33.8711	35.0597	32.016	36.176	35.8644	35.2611	36.4189	38.5033	43.7689	36.1442	38.5488	64.8227	65.1776	58.2023	0.00944311	0.488136
FBgn0035558	CG11357	53.1237	36.6423	36.4475	25.5271	30.1864	34.3063	13.3485	17.6257	7.61266	111.92	114.769	131.472	61.7286	79.5045	74.2947	97.741	94.6599	93.0805	104.216	88.9319	97.5045	125.594	116.808	128.493	0.00944953	0.305727
FBgn0259742	CG42360	51.2453	36.2145	33.0467	47.0298	22.9162	23.7639	12.9908	10.7141	0	107.339	155.408	166.207	33.139	46.0194	43.6914	46.1359	48.0963	44.1965	52.3178	40.5806	42.768	89.4679	78.4114	73.7129	0.00945196	0.19671
FBgn0036135	mRpL2	95.5052	94.1602	56.6492	23.7044	40.1798	43.4746	21.7231	25.4785	12.6765	270.111	205.783	209.313	41.6191	43.3435	46.2585	45.2629	42.9879	40.9477	34.0794	37.1613	39.8835	42.2554	43.294	46.0919	0.00947138	0.243096
FBgn0030787	CG9609	59.8084	75.7242	85.96	57.2063	37.9757	44.5362	37.3186	18.6465	32.8214	5.92579	16.6678	9.65166	49.0329	67.6407	65.0284	64.278	73.4817	72.4112	76.4452	65.1186	71.8269	117.032	126.996	118.234	0.00948518	0.400855
FBgn0036486	Msh6	324.602	268.52	225.409	224.865	189.837	163.964	151.086	120.073	115.679	38.5945	42.7719	35.0993	154.046	171.263	168.445	159.468	155.695	152.761	142.372	133.819	125.582	232.988	212.787	201.073	0.00950639	0.472601
FBgn0261068	LSm7	302.433	200.816	232.981	155.971	96.4916	113.625	89.2437	93.7479	116.608	226.365	271.463	189.363	163.092	74.5358	134.396	160.278	143.577	150.891	139.461	163.721	179.374	124.906	140.791	133.975	0.00951128	0.406938
FBgn0053158	CG33158	27.8931	27.171	16.1343	15.3965	12.3165	15.68	5.36486	6.81309	5.30107	13.6994	16.7686	14.0316	14.8292	17.2118	16.8192	13.751	13.5638	13.0065	11.1472	13.1563	12.5862	32.4736	28.0119	24.537	0.00954019	0.245497
FBgn0010238	Lac	109.509	117.143	158.767	61.8358	81.9211	83.0292	54.4315	59.5162	56.2907	605.551	479.704	535.848	34.9518	45.4187	47.1173	34.9505	45.92	46.5732	44.8562	46.7961	42.2816	45.0257	57.6624	62.4673	0.00955981	0.441697
FBgn0039402	Vps2	135.767	134.598	81.0843	41.6431	64.125	51.3442	40.0242	21.7628	25.6931	62.6476	73.5643	58.6236	37.5655	41.9835	45.9374	37.4189	37.009	37.8286	40.7765	36.8224	32.9505	62.8768	61.578	61.1197	0.00956917	0.248912
FBgn0031834	CG13766	77.4043	54.0191	98.1678	31.4807	15.2505	26.3605	20.1114	16.5678	9.98045	16.7948	5.33793	14.6642	24.5069	25.8953	28.0047	31.4049	31.152	34.3402	40.078	32.0944	28.8855	53.3103	52.6278	49.828	0.00960935	0.203229
FBgn0261789	SmD2	402.557	462.568	385.592	133.398	227.85	190.959	175.895	138.443	276.293	999.272	1012.26	1025.97	167.968	181.983	195.018	176.686	194.559	216.14	202.397	219.742	207.619	208.282	276.885	277.295	0.00966057	0.472235
FBgn0032482	Pect	117.998	168.568	149.945	76.1531	85.9127	84.9245	23.1386	67.7786	0	823.25	908.212	945.646	67.6734	79.8645	78.4377	75.7182	79.4665	78.1017	87.8512	77.4042	73.5978	183.467	165.539	168.112	0.00966088	0.208281
FBgn0267977	mh	82.756	80.1138	80.3763	78.2362	65.9352	69.8025	57.65	36.5685	55.2818	17.8023	15.0779	11.9928	36.68	40.4493	42.0822	36.5447	39.4661	39.4866	35.4698	34.8802	30.7203	39.4877	48.518	48.653	0.00966267	0.614605
FBgn0038609	Nup43	78.9232	66.6788	107.269	40.6184	32.1365	38.1323	18.7891	30.487	28.6322	48.8809	46.3736	37.5125	102.467	109.106	108.417	115.867	119.065	114.013	111.597	107.222	113.18	104.787	113.743	107.401	0.00970069	0.308095
FBgn0034488	Hacl	212.267	141.462	221.307	119.158	112.606	86.7548	54.1163	83.9559	64.8494	80.3423	88.9569	82.9212	131.379	136.19	137.074	142.504	147.435	153.539	156.103	150.365	149.13	159.186	181.915	168.124	0.00970478	0.352885
FBgn0262519	Mi-2	71.08	99.3763	86.076	52.0494	51.3676	52.3413	49.3163	46.4391	45.9881	980.826	965.084	802.11	63.529	71.9814	74.7258	81.7552	92.6708	93.5735	99.5065	86.7002	86.1759	196.551	165.027	156.93	0.00970613	0.552536
FBgn0027330	l(1)G0020	16.5778	20.5691	21.8363	10.0581	18.9763	16.0439	9.01334	12.2304	6.90694	117.551	105.272	87.3213	28.6081	32.0987	31.4558	29.7124	33.4542	32.997	35.4951	29.9811	28.856	54.4969	54.2374	50.4712	0.00973472	0.477266
FBgn0037478	CG2656	33.109	26.4636	48.5744	7.99291	16.4802	16.7197	3.20311	8.08382	0	246.251	256.767	282.089	8.9403	17.2348	20.3705	16.2336	18.1802	22.478	23.6041	20.2086	22.0061	25.8661	32.7477	33.4643	0.00973634	0.104367
FBgn0031640	Mon1	41.1588	43.4881	63.4736	31.0106	21.7431	24.059	18.9046	11.7046	5.78105	155.045	167.691	181.01	30.2445	35.9035	36.771	38.2673	37.5372	37.5961	40.7737	35.6229	35.9838	71.9985	63.2407	60.0215	0.00976719	0.24568
FBgn0003862	trx	5.82694	6.63477	6.5026	3.84847	3.95243	3.92212	4.0861	3.48141	1.96673	8.38418	8.15634	5.94965	5.46646	10.5946	11.2569	10.1663	12.6566	11.3244	11.0576	9.79416	10.6193	80.8722	63.9944	61.0088	0.00976948	0.502746
FBgn0039489	CG5880	22.1471	28.1923	32.5011	9.6476	14.9786	17.0099	11.9232	7.21949	0	246.716	284.869	293.295	13.5318	20.6732	21.0806	22.2716	19.8808	20.8489	22.4474	21.4817	22.159	38.5289	26.5241	30.0055	0.00981515	0.231078
FBgn0000618	e(y)2	142.59	143.759	208.794	72.8869	69.4824	72.804	41.3058	60.9524	68.7062	486.409	593.826	537.432	38.0294	53.6991	61.6765	59.1298	55.1966	57.3166	63.2533	54.9905	62.482	80.9134	71.6186	72.173	0.00981749	0.345283
FBgn0017430	Nelf-E	78.797	134.82	106.552	48.1106	35.8136	58.113	16.4079	35.522	30.2136	107.775	107.306	96.6206	28.0931	40.6972	36.2276	38.5105	44.7859	45.4109	45.2472	45.8722	43.9764	74.2825	102.856	88.5555	0.00982741	0.256562
FBgn0033208	mRpL52	156.123	129.907	93.2485	26.2072	53.1266	51.807	40.3863	32.9086	0	237.504	294	220.461	47.5645	54.9685	53.8514	66.1985	71.9442	58.9763	70.1314	63.3605	71.6488	102.031	109.402	99.9038	0.00984479	0.193248
FBgn0034050	bug	84.477	103.363	118.551	47.5813	44.4632	39.1774	16.6212	38.1825	52.5104	251.669	278.945	231.583	18.479	19.0433	19.7083	19.7162	18.8997	20.2995	18.0019	17.7046	23.3277	27.8174	27.7153	25.7526	0.00984899	0.350252
FBgn0038080	CG12279	470.234	496.643	245.93	127.145	138.97	143.835	0	67.0862	0	248.726	364.678	366.076	65.0063	81.1614	78.3786	63.6292	61.3131	64.9879	42.9073	52.6188	60.2574	72.4315	70.3671	72.7295	0.00986271	0.0553148
FBgn0029924	CG4586	151.708	180.486	207.242	79.7413	134.11	94.9931	81.586	62.8907	107.989	226.332	218.008	167.736	167.787	162.863	164.309	172.937	175.861	182.713	160.105	164.659	162.141	184.449	179.285	173.66	0.00986385	0.468019
FBgn0022981	rpk	94.1358	106.449	137.398	48.7839	65.866	53.8877	52.3027	45.2564	56.3791	183.795	185.541	181.89	109.381	123.883	125.573	131.4	136.397	132.06	145.328	134.453	131.192	248.388	241.632	241.593	0.00986582	0.455462
FBgn0266599	Hsc70-4	2076.72	1770.97	2119.18	1421.49	1561.19	1541.03	1241.98	997.4	1427.75	5283.34	4677.84	4591.6	3280.92	3234.4	3062.43	3839.21	3863.15	3895.66	3602.22	3663.82	3602.06	2920.21	3204.86	3193.7	0.0098984	0.614583
FBgn0264978	Slh	78.8815	55.2328	76.1779	64.208	44.9209	44.5224	38.8712	25.6081	27.4322	27.9114	18.6597	16.6366	48.5667	49.5123	49.2296	46.9513	47.3304	47.7859	39.3548	42.8809	42.9534	51.9096	50.4293	50.5241	0.00991015	0.437065
FBgn0038608	WRNexo	181.3	252.361	125.754	46.0637	72.9189	81.6353	24.8794	17.1435	0	29.6147	18.3194	9.67729	74.0644	93.9324	96.6878	79.6591	87.4201	80.4568	77.3535	70.6233	76.5403	142.645	152.941	142.745	0.00991778	0.0751196
FBgn0283509	Phm	9.53082	5.82278	12.0759	0	6.71254	0	0	1.43635	0	3.00526	3.99618	4.75239	20.2277	25.639	26.7896	33.5134	29.6657	30.7137	33.3693	33.805	31.3982	49.3226	51.7911	50.2342	0.00992066	0.0523653
FBgn0039680	Cap-D2	83.5952	108.039	78.0244	56.2955	61.1948	57.307	50.9484	42.174	43.5085	107.896	114.708	116.499	76.7144	81.6604	81.8326	64.1638	64.0465	61.6549	54.5031	55.212	52.2185	94.5373	78.904	75.8372	0.00993699	0.506681
FBgn0013717	not	31.8535	48.1134	44.9602	27.8514	37.8061	19.0225	18.7328	18.049	10.7638	253.083	260.592	274.936	41.4671	52.6453	51.4922	59.5252	55.0611	57.1383	59.4231	61.5207	56.5517	82.7387	77.4491	84.0188	0.00994485	0.380586
FBgn0033616	CG7745	50.8464	52.8593	78.6778	44.2851	32.5801	30.1544	11.6486	18.8073	21.4861	3.44369	5.31339	5.5289	36.9551	39.8922	43.907	46.9311	51.8003	54.367	55.3117	47.4658	45.6565	98.649	105.842	99.7424	0.00994683	0.284796
FBgn0035537	CG11342	41.8052	27.867	29.8632	8.2313	7.79436	14.8896	13.9799	9.87928	4.46719	53.7228	59.9848	60.0932	51.9604	47.2981	48.7477	56.8038	51.2743	55.1916	69.6017	58.4925	54.8215	39.6472	39.1269	34.7246	0.00996549	0.284585
FBgn0037901	Exd2	26.3009	28.2612	24.9966	12.5924	15.9246	21.7718	18.0753	10.9274	8.39273	19.7559	3.45004	13.5672	39.3511	46.6236	44.0737	50.6383	50.8384	54.2039	44.1249	47.1767	43.0786	59.5858	61.169	56.1901	0.00997312	0.470035
FBgn0034067	CG8399	21.0225	23.5536	22.1939	21.6126	15.6598	18.1583	16.0952	13.1745	9.58491	30.5077	28.8965	29.0351	36.4837	36.0832	37.8525	43.065	45.6422	42.5788	43.7883	38.9262	45.4791	54.4932	56.0441	54.1083	0.00997726	0.581918
FBgn0037802	Sirt6	25.9632	33.6521	34.7107	15.3182	14.9697	17.5079	17.7176	7.89458	6.22612	8.22693	11.1844	7.52277	21.4584	24.1199	28.6932	33.828	28.0559	28.32	30.3193	26.2462	25.2957	54.6367	49.0077	50.7658	0.00998494	0.337535
FBgn0036640	nxf2	87.2777	113.184	73.1247	48.7619	55.1825	41.8697	39.2441	25.2831	10.399	74.8062	99.8241	115.941	52.2324	54.5459	59.3791	40.9831	46.3605	45.9767	42.9418	34.927	34.2251	87.8678	83.2236	72.8117	0.0100051	0.273866
FBgn0028467	CG11070	9.65488	12.6923	11.9709	4.10843	8.45948	8.97446	6.79467	6.21559	3.9834	129.245	122.162	111.088	18.4922	27.2986	28.9005	35.9477	40.7324	38.0714	39.2229	35.9721	37.9131	82.9011	81.5752	77.8164	0.0100085	0.495181
FBgn0039588	mIF2	21.9416	12.4922	20.0081	4.37444	6.00952	7.60838	3.37444	3.73206	5.97891	8.90627	8.96047	11.653	9.99146	12.49	11.3593	11.1607	11.8613	12.0896	11.4391	11.178	10.5425	17.7246	18.2281	16.6989	0.0100111	0.240356
FBgn0052163	CG32163	38.6528	59.4185	45.4545	5.21739	8.16692	10.2687	0	0.926741	19.8264	109.216	121.599	153.901	35.9319	20.9246	32.8504	43.5399	25.5037	28.6432	21.3093	18.9747	25.1261	34.7607	33.5222	46.7845	0.0100179	0.144595
FBgn0031655	Marcal1	202.584	186.416	132.035	132.749	115.576	97.7232	75.6895	79.5682	59.272	14.0437	14.0722	12.3189	70.5557	73.6903	70.988	59.1832	54.7292	54.6199	50.8552	47.0378	44.2624	70.987	65.505	62.0616	0.0100557	0.411738
FBgn0038467	AdSL	132.937	137.55	187.711	88.8892	102.675	110.904	70.7789	76.6107	62.1045	274.552	263.937	208.702	81.4886	90.9631	93.8387	88.9299	91.522	85.3987	105.276	92.0869	93.9441	118.669	120.759	119.158	0.0100638	0.457212
FBgn0038400	CG5903	172.71	160.167	144.75	128.059	75.5776	109.387	76.8925	60.279	0	171.293	161.312	143.308	201.975	195.384	199.768	178.16	190.162	187.44	214.591	190.816	192.561	181.388	199.284	198.584	0.0100995	0.287194
FBgn0013684	mt:ND5	390.132	496.86	231.871	37.9738	25.5335	26.332	8.80373	25.6038	22.871	177.762	369.401	273.164	730.571	924.497	996.042	323.81	360.549	329.518	232.544	269.185	203.682	815.097	668.103	738.453	0.0101333	0.0511935
FBgn0031161	CG15445	28.4133	19.7171	24.4502	11.4871	3.90788	12.6934	11.351	3.6761	0	28.7965	23.6061	33.6553	16.9678	17.9691	17.0779	19.9904	19.7784	21.1438	27.674	21.7955	19.664	26.7742	27.2383	24.6095	0.0101376	0.207041
FBgn0029713	CG11436	8.54994	8.32861	11.5525	11.9658	8.24218	12.2107	5.00648	3.99736	2.90107	104.569	78.9237	70.4718	12.5996	15.4028	16.0417	23.8071	27.2429	25.8383	26.4602	25.6744	27.9269	75.2779	63.6959	61.3913	0.0102312	0.41873
FBgn0035247	metl	23.0643	18.5388	17.5037	7.73677	14.1081	8.53713	5.64175	11.1209	9.77889	184.075	215.439	201.934	38.7619	32.599	34.9245	45.3379	40.2896	39.63	44.4874	41.0039	42.1477	43.6939	39.097	43.836	0.010235	0.449044
FBgn0033773	Mos	147.384	162.522	116.891	128.863	74.1673	83.2959	64.5791	79.4129	39.7299	6.89137	10.161	9.6616	99.1734	102.223	108.129	109.281	115.953	120.928	127.018	118.045	111.001	148.404	147.249	140.484	0.010246	0.430467
FBgn0004907	14-3-3zeta	1123.14	1436.28	967.519	944.954	759.439	851.391	339.865	476.608	0	4456.87	4980.72	8024.6	480.359	583.213	595.124	679.2	730.921	724.522	750.384	715.777	681.016	838.818	745.005	795.077	0.0102566	0.231497
FBgn0036290	CG10638	221.553	181.232	131.495	103.021	115.534	105.732	27.2634	65.4137	0	376.785	452.029	367.008	84.2874	80.6039	93.2704	80.1472	91.2414	80.6938	76.5934	79.1846	77.3686	103.856	106.571	106.728	0.0102727	0.173462
FBgn0035761	RhoGEF4	79.051	90.6464	90.032	55.4763	62.0102	53.8005	54.7208	42.9831	22.2989	86.0495	73.7888	75.0382	54.5835	60.7322	55.6061	55.5154	51.9567	49.5461	62.3501	52.3574	46.7415	56.0432	56.8953	56.0336	0.0102853	0.46203
FBgn0031573	CG3407	20.5764	31.3728	18.269	15.3594	14.3387	13.6244	4.55897	5.5404	4.6433	57.0587	60.3957	72.3259	11.4608	21.203	21.447	24.267	25.3351	21.1773	20.1678	20.9615	21.3401	44.7306	49.1466	45.0922	0.0103004	0.209955
FBgn0039994	conu	33.8091	48.8811	37.731	26.3773	12.3951	16.716	18.129	7.32466	0	314.568	480.801	544.129	94.8123	120.192	123.204	175.778	183.942	178.135	196.594	174.854	164.319	280.966	265.032	244.884	0.010307	0.211372
FBgn0000412	D1	195.329	289.742	271.757	81.1552	109.843	140.535	109.161	121.971	65.5337	3722.88	3167.16	3094.75	91.2123	131.576	135.131	159.235	174.553	177.749	198.153	171.232	174.168	294.769	292.271	312.912	0.0103075	0.391986
FBgn0053526	PNUTS	87.58	121.316	146.843	71.2789	64.0736	69.5686	40.7772	41.1941	38.5873	118.532	100.872	95.5183	47.8041	56.2647	54.4841	47.9933	51.8834	54.3636	49.6208	42.8414	41.3637	108.063	109.714	99.339	0.0103177	0.338897
FBgn0283477	SF2	450.381	629.935	596.824	422.936	417.748	396.947	194.102	316.15	269.155	2723.33	2724.45	3181.9	198.466	235.443	244.644	273.546	290.246	273.767	277.334	286.928	305.607	212.628	237.291	243.032	0.0103394	0.464724
FBgn0022029	l(2)k01209	67.9258	75.8341	68.9805	45.1676	46.8824	43.3251	49.4972	29.0837	24.9097	174.379	180.354	184.083	51.3233	56.5176	57.1694	65.4511	62.4664	58.9027	68.7046	58.6428	59.2103	88.9553	81.2435	86.6241	0.0103592	0.486465
FBgn0000115	Arl1	101.176	49.3283	93.7404	30.2384	0	21.9245	9.15639	9.66456	0	700.527	779.659	810.457	44.7149	56.8934	61.7522	62.1299	63.1481	69.2064	82.4332	57.3584	65.1914	83.1117	108.507	109.667	0.0103599	0.0770578
FBgn0034921	DCP1	141.72	110.8	174.213	71.9631	79.5522	49.0487	51.9755	40.6996	65.4584	141.324	154.879	176.232	45.2239	48.3707	48.2646	55.3048	55.6399	57.1653	59.4957	53.3143	56.9078	69.4252	78.2547	78.0782	0.0103794	0.370568
FBgn0028746	CG18508	54.9046	86.621	48.1398	25.8065	25.0134	23.0634	6.55514	13.0787	0	178.031	273.942	289.47	16.9428	22.0785	21.0101	23.1748	31.5039	22.3099	35.008	34.1125	28.0247	53.5624	55.55	47.158	0.0103925	0.103518
FBgn0036537	CG18081	239.877	458.886	392.92	181.767	114.094	115.683	49.3643	89.0288	0	1074.63	1318.86	2013.86	274.483	312.847	304.885	322.833	345.385	446.114	430.687	351.002	352.92	321.744	323.205	374.915	0.0103935	0.12677
FBgn0036257	RhoGAP68F	92.6352	175.765	142.232	63.0871	61.1035	73.5094	32.0771	20.8766	24.9778	28.6453	28.1229	20.4986	50.9507	64.9895	65.6432	56.7394	70.5014	68.6757	64.4762	62.9458	62.2282	126.48	123.772	115.014	0.0104077	0.189784
FBgn0039350	jigr1	31.276	38.5143	33.2464	23.5624	0	30.5017	15.3595	14.1611	0	778.314	764.376	812.249	116.713	166.164	174.652	223.401	253.421	240.407	269.481	244.056	245.557	384.898	434.065	416.591	0.0104104	0.286505
FBgn0034962	MAN1	52.3565	81.0475	77.9826	32.221	33.4933	31.9244	27.4005	30.9795	17.9221	514.596	476.629	504.442	48.5201	64.4424	66.5325	83.0254	87.7324	76.718	87.4757	87.9349	78.3021	167.636	155.895	155.722	0.010413	0.36096
FBgn0039210	CG13625	29.3321	52.0262	51.4559	17.1217	15.3772	15.8215	12.2593	9.30625	3.7636	104.912	119.363	107.674	19.2747	27.3098	25.9751	24.7194	33.0567	29.2392	32.2795	24.2341	27.2029	60.1088	60.2638	59.3769	0.0104229	0.190711
FBgn0260938	tay	0	1.07746	0	2.96856	3.0552	3.01616	2.2831	1.83089	2.37287	29.5515	35.3428	36.872	1.58936	3.05045	3.04851	5.90931	6.4166	6.45452	10.0584	8.85044	7.82174	64.2389	57.3317	52.5462	0.0104255	6.02054
FBgn0038803	CG5191	0.699882	0	0	0	4.73208	7.16215	7.44357	3.98099	8.66072	6.12598	12.3858	9.58327	17.3388	18.9761	22.3368	26.5728	31.264	32.1687	27.2199	30.5762	32.548	51.777	57.8706	59.4613	0.0104406	28.6981
FBgn0045866	bai	27.9442	34.2265	56.6426	0	0	14.9879	0	0	0	55.6822	37.5745	75.1512	150.702	150.473	143.581	154.289	181.46	164.987	174.779	166.199	160.002	224.281	235.158	210.216	0.0104413	0
FBgn0031281	Saf6	22.1615	28.9495	35.1749	18.3514	22.4494	18.9328	7.68622	10.9347	0	36.1845	41.1747	34.3814	17.9553	20.5647	22.0184	19.6	20.875	18.8745	17.4671	17.405	18.6977	28.9131	26.2724	26.3666	0.0104608	0.215805
FBgn0037780	ohgt	31.2019	45.9837	50.0341	18.6428	26.1124	20.9883	12.3083	7.99779	18.5064	132.6	139.019	159.392	28.9745	34.6639	34.2523	28.013	31.0878	32.3148	32.7509	29.0243	32.4144	51.2909	47.3529	48.5	0.0104636	0.305083
FBgn0036292	CG10646	42.0355	39.0377	57.5419	42.3702	15.6271	28.6723	21.086	19.475	13.0739	200.154	205.788	203.037	23.5513	25.8212	28.0806	26.4851	24.6835	28.2432	25.685	25.3858	24.3319	41.7548	36.6419	37.8109	0.0104679	0.386934
FBgn0037746	CG8478	76.9165	81.5966	66.1922	52.8184	56.6346	71.1603	29.8656	49.7018	25.0674	816.802	767.294	822.765	62.5997	80.5342	66.325	98.2616	80.318	97.7711	93.1854	84.5791	68.8326	99.3714	104.592	84.5985	0.0104796	0.465654
FBgn0033392	CG8027	6.54475	5.77449	3.92954	1.80434	2.01021	2.52339	1.84057	1.4074	0	40.2802	42.1927	36.1516	11.6296	19.7903	18.5031	23.2207	23.2104	26.2277	27.5526	25.7704	25.2259	59.8506	53.2033	54.772	0.0104882	0.19989
FBgn0002906	Blm	32.8497	34.9875	23.5744	18.9129	20.7782	20.3095	15.7597	13.3865	10.894	56.358	68.9421	55.1451	25.668	31.652	34.3986	36.1317	37.3645	34.6252	36.9178	30.726	31.8032	98.7743	86.2061	78.361	0.010519	0.438021
FBgn0039790	CG2246	131.118	139.219	84.4427	64.7179	109.547	97.1409	31.4327	48.1215	27.9891	188.498	138.34	144.844	85.3502	86.2967	88.1891	91.2467	103.582	101.78	108.772	97.2053	95.2769	145.211	163.13	151.112	0.0105249	0.303127
FBgn0015271	Orc5	104.255	156.619	173.524	82.3661	59.4448	52.9791	54.5238	49.5043	43.0381	110.597	131.343	129.629	55.3631	67.6872	64.1575	56.0745	52.3575	54.8382	52.1574	51.3226	49.9597	92.5089	90.8898	82.88	0.0105288	0.338552
FBgn0020261	pcm	84.9821	76.4608	113.002	54.1592	65.4045	63.8516	43.5618	41.5603	33.8214	96.606	91.1482	82.9862	43.6074	46.8215	46.9129	41.9973	42.5395	43.3546	36.9129	35.9374	35.8018	76.4375	69.8582	64.9929	0.0105393	0.433396
FBgn0051211	CG31211	11.1908	10.4095	14.7459	8.99	9.19122	9.61868	6.44819	5.80861	4.80076	22.6614	24.8507	26.0656	11.7805	14.7162	12.7166	14.2871	16.0187	16.1726	16.3867	12.4921	16.4134	33.9699	35.552	33.8127	0.0105423	0.469307
FBgn0004649	yl	1647.69	1449.73	1929.65	1041.76	1165.25	1115.04	1006.6	797.001	1051.06	3055.05	1980.06	1862.44	1172.21	1028.45	994.008	915.977	927.25	918.207	937.075	852.046	834.136	813.453	578.897	632.606	0.0105581	0.567858
FBgn0266917	Sf3a1	80.6089	86.1108	55.5883	38.2288	37.3003	31.5016	30.0488	30.477	13.7361	374.51	370.802	326.924	34.1327	46.9878	49.4021	46.6303	51.8892	48.3525	52.7487	44.0112	43.3111	75.4851	71.0513	69.6507	0.0105631	0.33405
FBgn0034964	IntS1	54.9998	60.5661	67.3357	41.8733	45.3119	41.814	45.019	34.3876	33.3498	43.4824	39.2485	32.1284	34.8592	43.428	42.957	31.8552	32.9016	32.1755	29.4203	28.4877	27.0765	76.9899	60.3623	56.5647	0.0105664	0.616487
FBgn0031253	CG11885	245.472	163.173	277.631	82.0746	94.143	75.541	65.3124	78.2516	76.2144	490.399	543.139	494.73	71.5115	62.4582	73.0117	64.2515	52.4782	50.6269	49.1199	64.7111	57.555	70.5881	73.4001	69.1162	0.0105677	0.320248
FBgn0052344	CG32344	48.0865	40.3504	27.7647	19.8667	13.1095	13.5465	12.8668	12.2178	9.20655	190.387	197.996	180.331	23.9103	28.6572	30.082	26.627	33.3748	30.25	29.2385	28.7056	28.3232	59.351	59.4051	58.5977	0.0105832	0.295101
FBgn0050051	Tmem18	293.256	268.094	129.622	80.4511	121.055	135.396	0	0	0	213.846	287.278	283.445	27.3159	41.9023	37.3127	35.4529	35.0679	37.603	35.6163	33.8415	37.9562	49.3183	43.7037	45.8215	0.0105974	0
FBgn0037657	hyx	28.0774	35.0896	39.3765	20.9284	23.8274	15.7261	13.307	14.7943	20.5694	160.34	170.394	196.465	36.6758	42.0828	45.0464	50.8633	48.803	48.9021	50.0213	47.4921	48.0837	64.6176	71.8181	69.1703	0.0106201	0.474635
FBgn0038438	Der-2	68.9039	62.0159	50.8217	59.6992	32.6878	54.2027	24.667	13.7565	34.6469	214.101	165.533	154.896	45.3229	53.8642	54.6072	46.6508	57.0924	60.5876	51.4612	53.2919	50.3044	100.549	103.931	104.336	0.0106378	0.402057
FBgn0026570	CG5704	41.9082	52.7679	40.9523	22.3667	33.251	32.4939	22.1701	21.4829	6.82518	115.047	147.312	134.599	20.4308	22.8565	24.6977	25.4025	29.0264	24.0164	28.3645	25.5327	23.8935	45.5593	41.3899	45.5715	0.0106444	0.37218
FBgn0035907	GstO1	74.9198	83.0629	135.843	39.0808	23.3226	21.0543	6.651	17.8259	4.27581	159.968	182.067	156.787	78.949	83.0251	85.8539	96.553	92.7589	96.183	92.6924	99.0937	102.324	108.08	100.57	99.0738	0.0106569	0.0978563
FBgn0285952	eEF5	392.649	498.772	310.827	208.061	93.302	254.356	0	155.325	89.4766	5722.74	6604.09	6159.02	6351.15	5873.58	5670.37	6150.19	6014.74	5955.46	5682.71	6190.47	5876.27	3080.93	3000.31	2992.13	0.0106601	0.20362
FBgn0032979	Clamp	50.633	74.9972	49.5478	17.8235	21.6747	25.0934	10.7195	22.7357	1.27247	826.397	949.992	988.986	47.1204	69.6653	72.5416	85.6159	102.562	92.8306	110.479	87.2682	95.6907	286.977	253.238	254.054	0.0107126	0.198243
FBgn0041627	Ku80	31.8157	22.2295	39.5094	14.0854	11.8423	12.3689	6.32204	9.59126	0	47.732	47.4728	35.6411	26.3222	28.4623	31.2655	29.4191	29.9024	30.302	31.1497	29.0427	27.5527	59.0166	58.5552	57.6829	0.0107274	0.170096
FBgn0032921	Mpp6	63.8462	53.3932	35.7106	26.6168	16.5283	36.516	15.9601	12.0623	3.8813	104.988	109.51	139.556	49.4969	38.4005	44.7831	45.1442	50.4032	49.4981	59.6432	44.478	54.0848	64.6452	54.5672	50.5973	0.0107509	0.208589
FBgn0001995	mRpL4	85.3459	108.881	96.5118	91.2589	40.7656	48.1329	51.3307	41.569	11.5094	154.332	155.233	166.518	48.0351	60.6186	57.112	68.6983	67.7246	61.7274	68.5964	54.951	66.2926	83.1872	85.4424	84.3101	0.0107528	0.359118
FBgn0283494	Adk2	61.301	77.7034	119.031	35.007	32.2957	39.9339	0	15.4978	0	274.658	327.728	266.274	274.069	276.727	264.06	285.928	283.815	290.711	302.838	291.812	275.659	206.035	230.244	216.382	0.0107595	0.0600608
FBgn0003701	thr	44.7862	56.0277	45.5774	33.4408	41.9188	40.696	27.3397	33.1156	31.6461	210.592	265.818	265.679	55.0664	68.5498	69.2024	66.7504	75.9758	66.8766	73.571	61.8846	62.2569	170.462	136.468	130.994	0.0107697	0.629146
FBgn0027053	CSN5	216.935	191.791	327.151	86.1672	60.9714	88.2724	65.2231	59.587	29.5638	504.12	460.722	526.816	117.008	143.469	139.727	143.455	151.366	149.784	144.266	147.274	144.692	135.165	136.985	137.027	0.0107722	0.209782
FBgn0035591	CG4611	42.2238	34.0807	48.2975	21.8339	24.9563	20.8622	20.8656	20.4971	10.18	14.2625	11.6483	14.2893	18.8277	22.1511	22.3501	19.1493	18.9138	18.475	20.153	19.3087	18.2127	29.3311	28.8909	25.9304	0.0107838	0.413659
FBgn0034243	Ns2	33.3799	37.2388	22.7048	12.0759	17.4746	12.4393	10.897	11.7148	11.8393	104.057	112.382	116.867	61.7259	60.3499	64.6751	67.7274	63.8173	63.9353	63.5336	56.9116	58.0535	87.696	79.2507	75.9796	0.0107868	0.369158
FBgn0030093	Bap111	268.056	294.87	286.479	229.157	261.468	239.332	218.204	182.053	229.162	1181.55	974.544	964.771	101.859	113.869	118.533	132.357	131.857	137.595	132.511	121.552	129.215	148.687	137.896	151.928	0.010805	0.741012
FBgn0003607	Su(var)205	584.796	743.222	435.275	370.839	270.961	245.99	192.118	193.844	174.035	2135	2405.17	2253.88	344.821	342.466	347.187	327.426	344.212	330.87	362.773	308.011	329.105	383.361	420.749	416.093	0.0108231	0.317586
FBgn0266421	RPA3	768.65	555.185	915.24	323.142	208.6	253.086	290.818	277.383	250.793	1908.09	2229.82	1883.07	92.1704	100.913	117.514	110.494	112.851	112.312	128.076	105.688	116.061	123.987	128.893	136.937	0.0108237	0.365774
FBgn0033081	geminin	268.38	395.334	321.252	127.753	148.162	153.192	116.637	158.828	168.267	3897.7	3826.28	3741.92	160.63	213.634	219.666	234.41	296.837	282.849	279.808	283.567	276.628	251.451	351.795	369.29	0.010825	0.450505
FBgn0266580	Gp210	76.9223	75.5193	58.8556	45.7258	48.6162	48.7418	34.439	44.7857	26.801	462.185	430.22	449.261	80.9904	101.829	105.536	102.009	108.577	99.4456	95.5783	82.007	78.5365	146.574	99.3173	105.57	0.0108288	0.501785
FBgn0029860	CG15891	113.61	158.94	186.736	40.5283	82.1586	57.3502	62.497	44.1422	56.01	132.169	134.001	130.362	69.009	58.7784	67.8734	59.8321	62.5258	71.1278	64.3337	64.7255	75.8573	65.0575	59.6542	60.2854	0.0108312	0.354135
FBgn0034054	CG8366	30.2411	15.7484	27.639	10.3423	12.7308	12.0808	5.54666	3.92809	0	11.0672	9.03837	5.89375	20.4359	27.6214	27.9026	30.5497	28.8637	28.7064	31.4211	27.1809	30.1557	41.7422	37.2765	37.6608	0.0108465	0.128683
FBgn0265042	Irk1	15.3079	20.1662	13.6896	3.88749	3.81146	5.94777	7.94688	1.90059	3.33146	18.0166	16.2014	15.5181	23.7617	24.5249	22.1651	25.9538	32.446	26.8939	36.9331	33.4323	31.0989	25.9856	31.8332	31.8699	0.0108494	0.268063
FBgn0030177	CG2972	13.885	14.609	11.1477	6.03325	10.2519	5.86979	6.85954	7.30226	3.31822	126.821	114.309	122.335	18.3313	22.3863	24.98	27.548	33.7246	33.1381	27.2044	32.5847	30.6396	48.455	59.7431	57.661	0.010861	0.44095
FBgn0034689	CG2921	72.1313	44.9961	55.2693	14.5523	18.6154	22.8594	20.7096	5.23471	19.9704	43.3569	60.1488	63.0259	32.3252	47.1806	50.5444	45.6836	48.5214	44.9013	48.7065	40.3981	42.8094	76.745	86.0969	81.0221	0.0108618	0.266332
FBgn0023506	Es2	70.9837	42.206	63.4544	35.884	20.3741	24.3144	23.2883	17.4104	12.5362	165.236	136.697	166.973	31.5039	39.6725	35.4748	42.1508	41.9593	46.0998	44.4794	41.1018	42.0659	79.6737	78.8878	82.6744	0.0108979	0.301368
FBgn0037913	fabp	300.489	259.917	236.597	142.193	159.659	165.693	93.8239	174.206	100.509	661.275	731.974	783.164	866.405	1041.72	1066.73	1371.01	1322.61	1359.13	1437.72	1361.69	1408.01	1361.38	1513.39	1478.05	0.0109029	0.462407
FBgn0000566	Eip55E	146.423	144.435	222.839	69.4539	84.0293	75.2721	52.4483	61.385	48.3758	763.206	742.808	651.546	91.7554	102.165	102.771	109.356	104.647	104.855	108.643	108.543	111.507	128.952	117.713	133.794	0.0109058	0.315768
FBgn0031535	CG12795	79.3937	112.383	71.9737	30.7735	41.0882	40.5878	29.315	34.3798	31.6305	2058.2	1987.05	1893.71	63.1309	83.8726	87.2231	105.618	121.612	125.365	123.427	116.938	117.579	166.302	169.434	189.074	0.0109104	0.361422
FBgn0002566	lt	9.47203	12.6846	7.50124	0	0.967631	2.38935	2.6824	2.97163	0	78.2449	118.71	154.912	21.2914	45.0107	48.5513	53.7314	55.6501	53.7232	66.0195	51.1265	49.4199	111.403	89.8469	86.6331	0.0109126	0.190642
FBgn0035831	CG8038	107.907	130.912	151.515	79.609	76.6711	45.0002	58.0554	59.8459	79.4147	92.7138	88.5076	111.953	40.771	50.2253	44.6335	53.1448	54.9325	49.8818	49.6729	48.5912	50.2519	68.7046	70.963	70.0779	0.0109147	0.505505
FBgn0053822	His1:CG33822	6.02601	12.5189	8.6088	1.26228	1.09379	1.06966	0.547228	0.937083	0	0.928392	2.95511	20.6107	67.52	101.973	109.533	118.428	124.255	124.14	154.916	133.74	135.889	190.113	207.775	225.431	0.0109284	0.0546632
FBgn0035203	CG9149	59.4959	54.9746	67.2541	39.0532	44.7506	36.2872	32.1386	15.8059	0	56.9933	47.4317	25.3921	95.081	95.0412	89.662	99.9007	104.164	98.0139	103.164	100.739	96.1776	87.0338	98.0507	87.3625	0.010963	0.263831
FBgn0266111	ana3	10.4739	12.4566	14.3245	9.45459	10.4056	9.89525	7.05487	4.56841	7.03161	27.2017	27.4445	24.7994	16.9931	23.725	23.914	23.8264	27.4267	26.3332	30.7976	23.516	23.8243	125.589	98.3758	94.0425	0.0110024	0.500735
FBgn0028741	fab1	10.5881	11.4166	11.9771	7.33501	4.24211	5.94804	6.7591	3.30208	6.9958	34.198	31.8525	31.4481	18.9418	24.8584	23.7298	16.8125	18.413	17.639	16.8718	14.3832	14.4635	47.3825	39.9749	40.6236	0.0110137	0.501944
FBgn0022893	Df31	2844.31	4146.96	3887.61	2332.35	2058.51	2520.05	1546.61	1662.05	2009.56	24752.9	20407.4	19477.2	1891.44	1981.08	1979.53	2370.05	2494.5	2523.09	2586.95	2572.27	2512.59	2493.72	2268.03	2428.38	0.0110372	0.479665
FBgn0030121	Cfp1	27.1831	39.8818	38.9954	23.3644	22.9777	23.1641	14.6047	11.7654	18.6312	98.3307	97.4959	110.456	31.6699	21.6442	19.0098	43.4784	24.0364	35.1707	24.9091	23.5997	23.6565	37.0669	74.7645	39.4209	0.0110649	0.424298
FBgn0035162	Sf3b3	193.07	215.311	244.196	173.274	184.597	164.773	156.605	122.862	120.601	559.464	506.401	469.786	176.709	180.274	178.855	175.062	164.166	163.476	168.247	149.688	145.712	174.928	150.328	154.644	0.0110763	0.613058
FBgn0285971	prg	67.52	41.4169	50.1594	21.7535	21.17	34.1009	20.768	15.8727	17.9473	113.454	122.287	153.527	27.4527	34.3979	33.7857	33.7869	36.3144	41.7761	42.4624	32.897	33.8683	86.2648	76.3027	79.0571	0.0111125	0.343113
FBgn0034400	CG15099	12.881	20.7893	19.868	8.24642	7.55661	9.3717	6.50001	7.3543	5.35176	101.18	89.9617	70.1286	14.6006	20.2964	20.7598	16.2852	19.4476	19.1947	22.5074	17.3155	17.6964	73.4744	57.2224	55.3219	0.0111204	0.358735
FBgn0039846	PNPase	29.1877	22.6101	17.7976	10.4518	18.068	17.4311	7.5754	9.23133	8.09593	38.2826	31.7708	31.9218	21.8123	24.2591	23.391	26.1382	27.4232	26.2578	27.4912	26.9081	27.6928	47.148	45.7192	44.8693	0.0111246	0.35782
FBgn0264357	SNF4Agamma	176.276	174.692	165.704	147.276	146.916	143.399	140.91	104.032	106.604	494.206	514.734	593.887	66.6911	79.7838	84.6657	78.8175	86.3507	96.9752	87.2087	78.156	76.9908	126.219	120.328	117.747	0.011139	0.680404
FBgn0040395	Unc-76	79.7627	50.2854	73.7815	56.2004	47.1426	48.3159	22.1514	31.2964	24.5705	45.9022	79.771	59.3729	19.9206	52.0601	55.6764	53.713	61.3094	65.5593	59.9011	63.6455	58.902	99.3467	96.5911	93.6236	0.0111602	0.382762
FBgn0030817	CG4991	134.866	85.4887	140.079	59.6336	66.5836	80.5795	37.1956	44.1856	44.2536	23.3939	10.577	51.4842	112.524	152.052	156.593	189.981	221.364	217.49	238.548	209.469	228.811	466.163	475.389	444.993	0.0111636	0.348565
FBgn0261710	nocte	269.261	261.092	326.612	233.156	221.318	209.25	184.882	139.495	187.257	481.694	419.222	353.738	63.0442	42.8256	43.2219	37.2883	33.9251	44.8552	34.926	33.7316	29.5292	87.7299	77.9233	65.2542	0.0111685	0.59703
FBgn0030000	CG2260	68.3599	77.5189	98.1602	54.9182	54.312	57.4749	46.0245	28.9956	30.7861	154.377	146.613	138.179	39.1208	42.8216	42.1068	35.5164	38.6834	34.3823	33.6246	33.853	35.2251	47.9126	49.4931	49.6516	0.0111819	0.433563
FBgn0000524	dx	0	0	0	5.14486	14.7972	12.8557	4.43861	10.3222	8.34952	57.4395	54.4255	44.1963	10.5789	21.5161	23.0548	36.6728	48.8908	45.832	57.0308	55.168	54.1937	118.168	126.173	127.423	0.0111974	#DIV/0!
FBgn0263933	ebi	37.5534	48.7714	44.1797	26.789	26.7258	31.2209	16.8936	25.7822	26.9799	732.017	641.948	635.405	51.997	70.0027	71.2309	103.241	114.409	113.611	132.221	116.421	116.578	188.107	149.052	171.995	0.0111984	0.533742
FBgn0030607	dob	90.3121	109.403	149.994	59.7438	79.2993	59.7247	38.0921	38.4219	37.9978	155.755	132.138	180.126	36.4006	40.6438	43.165	38.1191	36.9469	40.8439	40.1975	34.221	34.8354	59.5127	57.0422	59.2618	0.0112032	0.327448
FBgn0001223	Hsp22	95.2635	99.6157	129.587	71.1516	73.4721	61.7002	35.4021	30.1761	62.417	87.6344	75.5782	114.659	26.1946	29.7603	30.9221	25.9111	29.0235	39.6095	37.3737	30.7824	32.6251	35.6115	37.3961	38.4345	0.0112138	0.394479
FBgn0027095	Manf	241.949	282.167	288.293	144.982	116.71	153.35	90.6272	140.153	0	878.867	759.581	844.144	167.803	168.692	168.408	193.065	183.115	202.54	235.757	205.503	202.261	220.82	208.459	201.698	0.0112157	0.284069
FBgn0001977	CIAPIN1	180.016	139.865	136.988	120.243	83.8685	97.7347	77.2571	72.0677	96.7124	240.457	224.068	292.578	78.3031	93.2182	86.958	79.3638	91.4583	94.0099	96.4175	98.8608	90.747	129.75	120.58	119.752	0.0112267	0.53853
FBgn0010417	Taf6	72.504	68.6956	63.7791	51.0458	70.6609	59.6267	56.3982	48.0701	45.736	91.8723	102.404	89.1973	82.2452	93.5507	88.7204	101.207	98.3661	100.093	96.2396	94.7694	94.4684	61.7484	66.4028	70.0996	0.011264	0.73278
FBgn0026324	Taf10b	126.865	124.959	182.082	76.9813	30.3263	43.5517	69.4256	51.1973	46.0419	880.176	1120.24	1051.22	61.568	74.132	74.8652	64.6271	70.9816	69.308	68.0017	56.7788	68.7514	77.6715	85.1644	88.727	0.0112689	0.384103
FBgn0013764	Chi	66.3912	71.0837	76.6527	45.6256	56.49	47.3427	50.6478	41.7273	55.3578	490.96	466.691	451.167	52.1865	62.6412	62.2777	72.9934	77.5055	76.2697	86.6169	80.6803	83.523	120.077	119.571	127.038	0.0112755	0.689929
FBgn0036187	RIOK1	6.60143	3.96748	5.74508	4.19464	4.11337	6.7873	1.69042	1.75163	0	93.6467	108.935	125.545	12.8378	23.5851	22.4826	31.2906	41.2946	34.3656	38.5338	30.4742	33.7562	84.9217	89.4056	86.7347	0.0112772	0.210987
FBgn0000326	clt	21.149	37.8891	27.1561	14.2668	11.584	15.5131	6.06694	5.80919	8.21813	43.5805	48.6889	37.7432	16.1503	19.1694	19.9487	15.9202	19.5994	17.5391	14.9811	16.7618	13.1939	21.4885	21.9296	24.1375	0.0112787	0.233128
FBgn0034138	RpS15	1157.82	1162.61	1453.03	919.155	861.438	816.604	506.498	650.45	825.605	3071.3	3284.59	2721.85	7764.47	6430.98	6364.05	6514.87	5945.57	6249.59	6187.56	6976.49	6829.61	2499.43	2759.75	2758.45	0.0112946	0.525393
FBgn0029820	CG16721	88.8844	62.2257	115.577	49.3666	27.2605	43.6751	16.0353	25.6796	14.2555	316.05	280.565	284.178	27.6151	26.935	27.7337	28.273	30.9698	27.8686	33.5443	30.6436	27.2908	33.7757	29.7122	34.8129	0.0112976	0.209873
FBgn0000063	Mps1	26.9148	31.5867	45.2782	5.9357	16.8495	15.438	8.96736	11.1587	9.71394	50.3386	61.4812	63.7201	24.7361	34.8998	31.944	34.5382	38.8154	37.3939	41.1812	35.1451	38.1866	70.499	71.2245	65.5244	0.0113092	0.287532
FBgn0022023	eIF3h	142.589	162.528	167.938	119.565	134.904	128.321	99.3828	99.4042	124.063	630.762	617.702	581.877	581.421	595.006	560.913	607.559	611.528	601.047	584.473	627.279	610.374	331.095	350.047	367.622	0.0113131	0.682478
FBgn0027603	Ulp1	113.84	168.15	150.438	84.2961	94.5631	90.9355	75.9879	72.4845	69.3497	307.906	331.06	274.935	124.774	142.509	142.106	101.884	100.055	92.4885	74.7485	73.057	62.8453	225.521	177.538	176.29	0.0113189	0.503719
FBgn0036916	Mtr3	92.3552	97.9355	96.4187	41.353	57.0915	41.2577	54.8226	27.193	61.895	112.651	98.3031	100.327	26.1984	31.2009	33.0297	27.9728	28.3114	22.9907	19.3803	26.1341	22.3934	29.3524	36.1285	33.3139	0.0113229	0.501939
FBgn0263831	Gen	9.32663	6.34741	4.80008	4.86827	0	2.43503	1.37629	0.623666	0	5.35115	5.82399	4.59889	23.2121	21.9237	22.6603	21.1729	21.4961	22.1695	16.8537	19.2477	18.5041	25.0392	29.372	27.1798	0.0113249	0.0976821
FBgn0064126	CG33722	179.041	134.842	249.548	73.5393	45.344	55.8381	27.3255	40.2325	45.2982	149.498	139.92	147.239	122.787	122.661	124.332	112.561	110.692	113.597	109.96	109.438	101.217	135.628	121.784	120.184	0.0113346	0.200302
FBgn0026373	RpII33	123.827	105.744	151.565	72.5233	77.1615	78.0203	49.7442	49.7406	74.0389	463.305	518.689	505.338	68.184	74.7088	77.811	75.7063	72.9656	71.0507	78.5964	75.0904	84.5709	80.3869	88.5121	87.7316	0.01135	0.455279
FBgn0027348	bgm	128.361	107.73	135.301	95.6836	87.621	109.677	71.1422	65.396	89.1572	254.427	217.036	183.286	85.4003	104.633	100.06	110.294	119.166	119.458	137.105	117.821	110.091	169.781	172.805	164.91	0.0113569	0.607703
FBgn0038301	CG6654	26.2643	20.0722	22.3102	23.0883	12.0094	20.8097	14.2021	12.6797	8.40864	51.0132	51.6212	50.8589	16.1716	21.2007	21.5747	24.2756	23.9548	22.9292	21.7396	23.3514	25.2809	32.0234	34.7939	33.8059	0.0113737	0.514088
FBgn0036334	CG11267	349.403	432.072	378.587	0	183.589	211.278	203.319	0	0	1943.8	2207.58	2158.32	336.733	349.389	341.722	417.535	417.497	454.313	493.64	473.912	482.15	502.001	542.789	539.597	0.011409	0.175265
FBgn0000146	aub	79.2408	89.5051	47.0482	44.2991	31.5454	32.7055	9.65862	19.0698	13.4784	277.589	321.529	296.71	39.4855	46.7798	44.2396	38.4838	38.3751	41.1217	39.2115	37.9086	36.2694	70.1334	60.4234	56.9338	0.0114723	0.195588
FBgn0037313	CG1161	406.748	297.713	279.121	232.626	178.941	182.872	82.4714	138.322	156.897	131.972	164.405	171.847	99.9491	96.1586	97.4397	98.7331	90.6039	90.4481	102.627	91.2417	88.5848	84.3705	84.8652	92.6366	0.011482	0.383995
FBgn0035272	mRpL46	78.7744	59.9126	51.0389	23.1319	35.442	20.3689	25.3531	25.924	10.1029	59.5009	52.7885	36.2574	56.3326	63.0934	64.8396	72.1031	85.4916	75.6669	94.7033	85.9022	77.6107	90.888	106.709	92.855	0.0115181	0.323519
FBgn0036035	CG18178	173.6	248.251	159.065	102.305	92.9073	110.493	43.242	83.9162	53.3705	640.835	674.06	695.511	69.0893	82.8082	85.6579	88.7321	94.0404	92.0307	93.4734	86.7473	84.2324	113.14	115.238	119.237	0.0115311	0.310765
FBgn0034878	pita	50.931	69.7412	62.3946	33.4733	41.6112	35.706	35.7316	33.1811	38.6652	630.683	619.879	536.394	52.54	68.6538	68.3332	83.4801	89.8827	89.3334	104.453	88.8645	90.0575	138.814	137.035	138.625	0.0115452	0.587643
FBgn0027620	Acf	103.562	147.855	125.463	99.1223	98.648	100.054	71.0109	67.2289	68.7247	454.067	457.488	411.687	56.6368	74.2981	74.7682	73.2418	85.2258	76.4341	73.0864	64.3296	62.1858	200.563	188.886	173.25	0.0115707	0.549152
FBgn0036846	MESR6	70.3777	71.0646	61.368	34.5272	60.3471	37.7762	32.0308	42.7832	15.5978	278.813	221.568	304.764	21.2479	30.0238	28.6221	33.357	35.1351	36.5223	35.2399	32.9514	31.3325	51.626	50.4807	50.0671	0.0116188	0.445795
FBgn0031498	CG17260	54.4409	47.5258	33.2243	39.1443	25.9383	31.5297	19.951	15.0577	14.5101	52.9565	44.4206	67.1145	23.8781	29.6974	28.4267	29.6235	27.634	28.0742	33.2514	33.3365	28.8333	41.232	39.7756	41.3809	0.0116411	0.366287
FBgn0034117	CG7997	45.4856	28.5576	39.1092	11.7207	23.6698	29.0583	14.2039	11.7533	0	218.223	202.303	151.132	46.3263	41.0657	40.7696	48.6118	47.0511	50.3094	51.8646	51.1169	45.5315	50.0871	44.7041	52.3507	0.0116661	0.229401
FBgn0030718	ND-20	128.973	142.146	204.866	84.4866	63.7937	45.7541	51.3183	45.001	62.851	402.79	389.414	354.581	170.105	168.01	175.363	161.808	175.722	176.529	181.798	187.265	175.732	171.152	190.19	186.095	0.0116715	0.334402
FBgn0053052	Gorab	19.6041	28.3056	23.9213	8.63425	12.8148	14.4994	11.2457	6.30805	0	73.6816	65.4496	71.8912	38.954	39.2066	39.0491	46.226	47.4276	51.0211	46.2719	44.9483	48.2944	51.7921	59.4426	64.3657	0.0116828	0.244376
FBgn0027499	wde	42.3957	65.0424	48.488	34.0852	36.7943	35.7633	24.3813	20.5579	19.7487	128.227	120.8	121.867	41.2071	52.6209	52.2732	40.3828	45.0883	38.5429	39.0295	34.1568	30.942	109.22	98.0129	87.465	0.0117101	0.414863
FBgn0036124	CG7839	20.4158	36.4974	40.3593	13.2291	17.2695	14.4613	6.46661	6.06925	3.09663	248.95	253.575	243.262	21.186	33.7375	34.0304	33.1436	40.9395	36.2941	36.549	32.0992	30.5664	88.9483	73.1513	72.4065	0.0117809	0.160708
FBgn0004650	fs(1)N	50.1645	38.9818	44.9251	30.4812	31.9191	33.3303	31.5489	23.0466	23.4868	44.7895	41.898	40.7937	27.4396	40.5115	42.5854	44.6313	50.1628	49.716	56.7833	45.5831	46.3031	191.92	156.163	145.968	0.0117818	0.582392
FBgn0036136	Ufd1-like	203.556	121.276	201.163	114.681	63.6887	85.1107	55.9834	59.4757	53.8457	339.48	332.469	222.845	86.0042	87.6611	89.3093	80.2205	79.0687	79.3339	86.2846	80.2546	78.8464	118.034	99.0049	98.4072	0.011787	0.321875
FBgn0042712	HBS1	64.0059	53.8957	59.9687	36.0671	36.8165	42.5654	27.5973	36.2317	11.654	118.339	117.684	118.495	38.3162	42.5487	41.2847	42.4984	43.107	42.4254	40.7454	39.7309	42.6157	58.3569	57.0043	53.6183	0.011788	0.424371
FBgn0039696	Rnb	45.7062	55.3326	73.589	40.4134	24.2315	29.9027	23.8946	22.0299	20.0737	122.949	115.891	99.3811	31.9785	35.5059	37.8915	28.203	30.1631	33.077	35.2211	27.6959	26.6465	49.1439	45.8909	45.6309	0.0117944	0.377936
FBgn0002622	RpS3	1429.41	1095.84	1580.33	781.747	740.821	825.491	627.562	476.544	784.683	1795.48	1674.47	1550.88	4645.68	4049.28	4020.05	4090.14	3697.71	3859.76	3938.2	4106.31	4165.13	1671.86	1743.45	1826.03	0.0118313	0.460055
FBgn0011284	RpS4	663.77	531.299	489.975	493.446	481.013	542.434	319.978	349.917	295.546	558.137	589.573	668.494	5651.29	5082.32	5089.62	4650.71	4404.28	4560.29	4052.25	4425.82	4351.67	2510.68	2694.53	2747.99	0.0118472	0.572947
FBgn0019644	ATPsynB	298.026	281.043	329.562	230.067	289.271	195.327	164.413	225.958	143.543	3485.04	3408.09	3263.43	380.517	308.4	308.426	297.559	294.134	277.67	266.492	264.144	269.249	284.51	266.237	305.249	0.0118949	0.587603
FBgn0053635	CG33635	85.1221	58.9603	67.9015	51.4677	41.0691	28.7148	31.7828	21.3955	0	76.625	84.4221	79.9314	19.6806	24.5535	19.3252	21.6735	21.873	25.3562	31.251	22.7518	22.4196	47.1856	41.8129	34.4962	0.0119338	0.25086
FBgn0033636	tou	7.99589	9.21873	8.09024	6.06021	8.99899	5.93946	5.66363	6.51004	6.62344	59.8521	100.136	65.1445	11.5034	10.3685	15.2344	19.8442	16.5312	14.5954	22.3183	13.5483	15.1687	90.1702	75.8256	74.1654	0.0119354	0.742826
FBgn0002775	msl-3	26.7127	26.9486	36.2915	14.2597	20.4743	22.1168	9.8382	12.9857	17.1929	93.4479	117.812	124.862	29.5772	37.6811	40.8419	48.4085	52.8466	56.7004	60.4165	50.2182	57.2168	118.306	115.883	113.059	0.0119404	0.444865
FBgn0010602	lwr	254.017	391.837	406.379	151.155	148.314	159.938	81.1119	133.24	148.187	3220.38	3287.5	2887.36	240.526	260.006	249.368	271.871	278.698	310.922	280.309	288.244	293.98	334.556	369.771	400.057	0.0119855	0.344542
FBgn0045823	vsg	140.588	175.759	118.762	41.8188	59.5486	118.899	38.7662	58.3026	76.9708	906.666	985.697	929.915	77.9563	105.886	111.21	126.89	141.82	158.066	165.311	150.428	169.659	210.741	297.342	305.686	0.0120075	0.39999
FBgn0038488	m-cup	24.0147	39.3373	34.8865	13.5793	31.8849	27.4257	6.38308	13.4654	0	99.8992	104.909	81.85	59.2983	62.7329	59.8129	52.7215	55.7761	53.9752	50.4284	45.2649	46.101	76.0041	75.4945	76.3841	0.0120141	0.202044
FBgn0034641	mahj	36.7802	48.3523	33.5878	27.7111	34.9332	40.8328	16.7524	19.5809	21.2206	218.553	237.857	216.868	31.9508	40.8919	43.3796	42.3654	48.3389	44.8122	47.7124	40.7305	40.2121	118.733	103.104	97.1853	0.0120164	0.484785
FBgn0027080	TyrRS	98.5055	107.182	146.399	89.6526	77.9024	85.5936	56.2922	52.8765	42.3908	201.387	185.653	163.39	186.204	162.47	153.871	153.459	156.673	155.627	151.645	154.405	153.393	91.9307	98.1142	105.274	0.01202	0.430462
FBgn0002872	mu2	25.6251	24.6451	17.6804	21.5533	14.6567	17.9107	11.7334	12.3186	10.1907	44.6726	51.5441	45.5506	53.6786	62.9947	62.4654	62.5492	66.1642	63.2094	54.3007	52.1446	51.1756	102.036	92.7055	87.8191	0.012113	0.503936
[truncated: 12,174 more rows]
