# Supplementary material for: Prolonged ovarian storage of mature Drosophila oocytes dramatically increases meiotic spindle instability
Source: eLife. 2019 Nov 22;8:e49455. doi: 10.7554/eLife.49455 (PMC6905857; doi:10.7554/eLife.49455)
Supplement: Supplementary file 2. [file elife-49455-supp2.xlsx]

## Sheet: Sheet1
Table S2	“Pilot light” genes translationally upregulated during oocyte arrest.
		Ribosome profiling TPM value						mRNA-seq TPM value
Flybase ID	Gene symbol	oocyteA	oocyteB	oocyteC	embryoA	embyoB	embryoC	oocyteA	oocyteB	oocyteC	embryoA	embryoB	embryoC	ttest	fold-change
FBgn0031979	CCDC53	22.5305	30.63	38.2701	0	0.938314	0	15.7697	21.4258	22.9549	21.7007	17.6353	19.7551	0.00269683	97.4414
FBgn0053129	CG33129	883.892	774.073	903.498	34.3756	38.0308	19.2842	226.072	294.199	317.475	596.747	590.306	598.766	3.51972e-05	27.9359
FBgn0037022	CG11396	72.581	86.2556	86.0881	2.65882	3.37013	3.61784	43.7737	56.5329	55.678	55.2456	71.7819	64.7228	6.58811e-05	25.3892
FBgn0025634	CG13367	239.728	173.654	293.982	10.051	15.1998	15.7562	46.5122	55.5453	55.1315	45.5108	55.1983	51.908	0.00310462	17.2498
FBgn0033773	Mos	147.384	162.522	116.891	6.89894	10.1722	9.67221	99.1734	102.223	108.129	148.404	147.249	140.484	0.000582235	15.959
FBgn0034379	CG15073	20.4927	27.5465	31.6092	3.38234	1.28877	0.525412	17.3613	16.6617	17.4689	21.2563	21.3637	19.7932	0.00178736	15.3273
FBgn0030242	sofe	135.823	156.505	149.768	13.3327	12.281	6.51857	46.9426	59.0255	62.5934	87.309	96.3687	92.2357	2.93012e-05	13.7586
FBgn0031655	Marcal1	202.584	186.416	132.035	14.0591	14.0876	12.3324	70.5557	73.6903	70.988	70.987	65.505	62.0616	0.00168727	12.8717
FBgn0033616	CG7745	50.8464	52.8593	78.6778	3.44747	5.31923	5.53497	36.9551	39.8922	43.907	98.649	105.842	99.7424	0.00336979	12.7526
FBgn0034585	Rbpn-5	80.2659	58.0329	60.5251	6.70949	6.21539	3.1176	34.2713	44.3501	47.3545	81.5683	86.6156	79.4623	0.00102496	12.3936
FBgn0003980	Vm26Ab	63.99	95.235	119.458	6.67265	5.01268	12.5823	0	0	0	0	0	0	0.00638821	11.4837
FBgn0033883	CG16935	144.107	120.332	117.037	7.77008	13.91	14.3291	41.4212	35.4061	35.7157	44.0604	45.8149	44.7849	0.000195749	10.5939
FBgn0033692	wash	160.219	153.613	130.978	12.9174	10.5729	19.4551	59.4646	60.3011	60.5686	62.7981	71.0324	69.2492	0.000131855	10.3576
FBgn0050443	Opbp	19.8963	26.4119	23.8964	2.2898	4.55206	0	21.3628	19.1952	24.2881	38.6267	33.1639	34.9763	0.000791176	10.261
FBgn0032374	CG14931	365.288	392.463	390.487	34.4146	48.4496	29.7076	132.188	124.481	119.938	201.913	166.512	167.909	4.91666e-06	10.2
FBgn0032194	CG4901	35.2971	40.7253	25.2856	3.03277	4.57129	2.80191	51.2679	60.9282	57.792	105.487	103.241	94.1872	0.002654	9.73557
FBgn0035518	CG15011	58.2663	56.9723	35.2223	6.10072	5.05291	4.76423	40.9287	39.2633	37.889	48.8999	44.73	44.5472	0.00390428	9.45234
FBgn0038686	CG5555	148.082	156.048	165.339	16.2008	19.8601	16.0631	77.9194	90.1089	84.9265	76.4798	83.3847	80.0852	1.10726e-05	9.00679
FBgn0037368	CG1239	125	127.159	72.1304	11.4007	9.4643	17.7361	44.7937	57.8797	57.4318	96.8212	108.504	102.298	0.0063314	8.40105
FBgn0033209	CG12107	618.522	615.33	590.042	58.6367	94.7684	69.016	106.764	125.076	118.558	154.981	175.281	151.154	2.84015e-06	8.20018
FBgn0003979	Vm26Aa	453.85	460.752	758.064	72.8516	39.9277	93.3462	0	0.329445	0.18932	0	0	0	0.00853878	8.1148
FBgn0032450	CG5776	38.0303	38.8278	39.6846	2.94919	7.74619	4.32253	38.0838	45.4312	44.3351	102.214	95.5518	91.6198	2.31118e-05	7.76025
FBgn0266268	FeCH	269.739	228.836	196.124	25.7672	38.841	25.7532	81.5243	77.5926	75.2661	88.9777	105.47	96.1515	0.000753856	7.68801
FBgn0260632	dl	161.805	235.193	145.757	26.1463	25.2177	21.3345	64.5633	74.1872	80.8239	91.3395	103.956	97.927	0.0047318	7.46584
FBgn0037679	Aduk	31.4386	24.2764	36.6868	4.02558	4.94759	3.99063	33.8989	32.1186	35.0488	53.5793	54.7756	51.6628	0.00183967	7.12768
FBgn0283467	Pol32	171.757	182.045	102.331	22.0549	30.4243	11.6495	87.1252	84.6671	89.9761	105.511	100.323	98.4729	0.00697722	7.11276
FBgn0036486	Msh6	324.602	268.52	225.409	38.6369	42.8189	35.1378	154.046	171.263	168.445	232.988	212.787	201.073	0.00124874	7.02037
FBgn0034210	Camp	30.163	51.9237	56.745	8.08226	6.77886	5.03713	38.6303	42.401	44.5112	88.3196	92.5618	87.3108	0.00851899	6.97709
FBgn0039306	RIOK2	130.611	129.532	95.446	15.1915	22.8537	13.6407	50.3514	56.8384	54.9507	68.5606	67.8947	67.2157	0.00104197	6.87982
FBgn0030787	CG9609	59.8084	75.7242	85.96	5.93229	16.686	9.66225	49.0329	67.6407	65.0284	117.032	126.996	118.234	0.00156249	6.86148
FBgn0038692	Gdn1	150.969	187.854	219.525	33.7104	20.4897	27.6653	74.1488	79.1112	80.8936	79.4559	93.7125	83.0908	0.00140716	6.82031
FBgn0036772	CG5290	78.3348	78.1895	65.4529	11.5033	12.773	8.51649	30.7802	30.0474	28.9879	34.5645	35.7506	33.3323	0.000144277	6.76907
FBgn0000927	fs(1)Ya	398.432	355.906	498.797	51.6717	68.6456	64.9907	223.786	247.874	240.49	277.796	298.915	280.573	0.00112913	6.76244
FBgn0003983	Vm34Ca	320.768	488.329	479.779	55.8484	47.6502	92.0679	0	0	0	0	0	0	0.00290924	6.59047
FBgn0010431	mtrm	6766.57	6555.6	6781.62	1159.17	958.998	1002.55	969.86	1012.69	1050.58	984.659	962.247	921.937	4.74146e-07	6.44202
FBgn0263600	DNApol-delta	156.61	187.379	179.076	32.5776	28.8363	21.3784	93.247	100.477	101.9	153.33	126.806	109.456	0.000114087	6.31779
FBgn0031834	CG13766	77.4043	54.0191	98.1678	16.8133	5.34379	14.6803	24.5069	25.8953	28.0047	53.3103	52.6278	49.828	0.00829929	6.23257
FBgn0003527	stil	282.865	228.39	202.149	43.35	40.4463	31.5995	66.749	74.894	67.0783	37.3527	41.2936	38.5766	0.00115355	6.18224
FBgn0034259	P32	258.784	279.685	190.58	43.8436	47.8747	27.3755	286.219	310.441	305.41	376.715	424.329	391.69	0.00181546	6.12163
FBgn0033979	Cyp6a19	98.2856	57.7992	86.1646	15.8038	12.3662	12.6361	208.559	263.517	285.356	750.422	746.285	656.487	0.00507841	5.93659
FBgn0037070	CG11309	33.692	38.2584	48.3483	6.29455	7.25118	6.78279	33.4315	36.1145	34.8967	50.4251	56.8048	51.853	0.00154538	5.91773
FBgn0035947	Srp68	319.367	295.931	259.958	52.1621	53.2543	47.5784	107.612	116.848	120.441	139.651	149.042	145.719	0.000156878	5.72082
FBgn0038429	CG14882	23.2382	26.5942	39.957	5.42966	4.00763	6.75561	26.5643	29.6663	32.9179	69.7232	62.4117	63.6133	0.00898886	5.54499
FBgn0052243	CG32243	33.8141	40.4127	27.0086	2.05192	7.79565	8.44752	44.7072	63.8877	62.6464	145.322	135.294	122.235	0.00319632	5.53347
FBgn0267977	mh	82.756	80.1138	80.3763	17.8218	15.0944	12.006	36.68	40.4493	42.0822	39.4877	48.518	48.653	3.89055e-06	5.41483
FBgn0034999	Fatp3	112.18	96.4778	129.706	26.9798	20.1498	16.4124	63.3716	67.2598	68.9318	71.2081	88.1286	79.459	0.0008139	5.32505
FBgn0038049	Srlp	220.709	274.576	288.418	42.6419	52.6591	53.6896	116.781	114.534	119.841	116.422	123.187	118.05	0.000541128	5.26008
FBgn0086695	hd	116.95	89.8634	141.288	18.7952	26.7974	20.8899	77.4858	73.876	77.3024	76.5168	91.5442	83.4195	0.00336135	5.23598
FBgn0033698	CG8858	73.2519	72.9697	82.2584	17.2218	15.9992	10.4579	41.0549	41.859	41.4875	57.1271	45.7658	42.5301	7.56446e-05	5.2309
FBgn0013675	mt:CoII	5442.85	5878.96	3282.08	548.027	1246.11	1046.49	5567.52	5849.11	5735.77	3649.98	2989.02	2944.74	0.00911539	5.14108
FBgn0026718	Agpat2	49.7423	72.2312	80.9673	11.4599	16.0577	12.6729	57.0832	54.4076	58.0781	129.669	138.984	129.094	0.00447819	5.04946
FBgn0037686	RpL34b	7757.19	4373.33	6226.79	922.596	1355.44	1422.6	3532.51	3036.64	3004.84	990.907	1205.7	1210.96	0.00786729	4.96058
FBgn0036053	iPLA2-VIA	117.535	118.99	146.204	30.9724	28.8321	18.132	80.4176	95.0723	92.4842	130.409	117.258	108.304	0.000556527	4.91078
FBgn0030506	DNAlig4	28.9626	16.9043	23.632	4.61042	4.73088	5.03734	17.698	19.1379	18.7157	35.858	33.606	32.9436	0.00624139	4.83348
FBgn0000370	crc	118.932	156.325	181.389	20.7968	37.0071	37.2337	216.714	239.402	228.601	246.89	252.135	258.62	0.00312841	4.8049
FBgn0000351	cort	175.172	105.285	126.134	29.0115	30.7479	25.0068	75.0893	85.3262	85.0599	88.0405	103.502	95.1058	0.00669181	4.79662
FBgn0039349	Ssadh	94.2793	70.2142	69.4117	15.7424	18.7287	15.0626	29.7516	34.5929	33.388	56.019	56.5894	54.0007	0.00172366	4.72215
FBgn0002948	nod	278.624	288.622	313.392	67.5114	62.4359	56.6001	101.152	115.007	115.771	178.222	193.855	190.388	2.81231e-05	4.72072
FBgn0034728	rad50	40.5418	48.9595	38.5528	8.81779	9.7864	8.54754	44.3034	50.2857	52.6884	92.6667	78.3001	69.5513	0.000469865	4.71624
FBgn0039348	Npl4	252.428	286.505	346.845	79.3177	60.7442	47.9562	156.045	166.733	163.918	202.477	195.687	186.596	0.00132292	4.71114
FBgn0031379	CG7289	103.307	134.454	88.8289	23.3715	25.6931	21.9841	63.7878	66.5813	65.0458	56.8526	56.4448	55.18	0.00322968	4.5967
FBgn0001120	gnu	1137.28	982.678	1321.17	272.911	237.006	242.703	252.776	289.575	304.532	605.664	577.179	566.85	0.000808329	4.5722
FBgn0029879	APC7	291.005	247.732	275.389	67.4946	53.8341	56.9365	205.3	196.802	201.977	161.977	178.991	192.529	9.09176e-05	4.56693
FBgn0034187	CG6967	85.4597	94.2378	76.4607	19.6661	16.879	20.0908	39.785	52.3276	56.324	204.078	195.96	181.83	0.000220261	4.52289
FBgn0035150	Rev1	62.516	54.7426	48.7561	14.951	10.6513	11.3466	29.5611	32.3193	32.0969	44.0165	43.1833	36.1483	0.000512142	4.49309
FBgn0016698	Ptpa	193.932	171.287	188.018	42.2285	38.8215	45.2356	72.1014	61.8807	61.9606	72.6153	70.3586	63.6675	3.51439e-05	4.38083
FBgn0261380	mRpL37	43.7483	37.8859	42.9766	6.23809	13.3003	9.17631	65.0667	66.5459	66.2108	76.17	74.1002	69.7	0.000314268	4.33962
FBgn0034704	CG6758	51.0542	69.2235	61.0438	15.1946	16.5103	11.2044	42.4506	48.9383	53.0316	54.1614	51.4342	52.8019	0.00109767	4.22569
FBgn0030839	CG5613	49.4767	34.0679	57.2414	11.011	7.52904	15.6595	14.0487	16.1719	15.8759	11.2664	12.2481	12.7768	0.00786876	4.11661
FBgn0035593	CG4603	388.686	404.552	382.445	104.404	97.5688	86.4548	90.2815	85.6562	82.3623	74.8828	81.5818	79.5598	3.89409e-06	4.07618
FBgn0002593	RpLP1	1973.99	1348.18	2171.93	288.32	461.54	611.766	7164.19	6622.65	6394.76	2521.5	2998.62	2942.83	0.00654817	4.03496
FBgn0031664	CG8892	301.043	220.789	294.81	82.5395	75.2697	47.0059	126.306	119.444	120.614	88.4813	82.1102	81.2254	0.00187846	3.98721
FBgn0032296	CG6729	36.1054	29.3396	31.0355	7.33103	8.04719	8.9005	16.9468	19.5692	21.1924	24.204	23.5626	25.5612	0.000320174	3.97387
FBgn0032845	CG10747	107.385	93.3271	110.739	28.9458	29.8468	19.8646	45.2537	32.106	31.8061	14.1156	19.9384	17.3002	0.000236477	3.9596
FBgn0265512	mlt	84.1809	59.6062	57.287	21.6316	14.8712	15.7549	18.2849	24.5423	26.2164	25.395	32.5925	38.8864	0.00499982	3.84774
FBgn0033526	Caf1-105	109.882	101.567	94.0326	17.1429	30.6634	31.6906	74.5419	89.7229	95.4001	162.502	171.005	161.323	0.000326669	3.84269
FBgn0037781	Fancl	148.073	128.034	127.582	33.1456	41.048	31.7777	40.6104	34.4969	34.4479	33.6898	34.0057	34.0706	0.00017394	3.80942
FBgn0034265	Snx16	26.6681	20.7233	24.3331	3.4991	6.81953	8.55023	32.1127	34.5259	34.2147	91.4596	86.114	85.6583	0.00150362	3.80121
FBgn0015270	Orc2	168.268	139.603	114.249	35.3154	35.6997	40.1257	64.1811	72.6573	78.2398	108.114	111.772	104.238	0.00271381	3.79807
FBgn0033351	AIMP1	132.351	120.494	181.878	52.3601	28.8455	34.1743	79.8486	78.7009	90.1548	87.539	96.2954	93.4974	0.006106	3.76775
FBgn0036662	CG9706	48.8091	64.6559	81.5689	20.8514	14.8559	16.4462	25.5131	30.5158	31.1881	47.9173	47.0025	43.2465	0.00777694	3.73961
FBgn0029892	CG3184	15.5011	9.77941	11.7621	3.34169	3.1007	3.47837	15.567	21.5317	20.9053	16.2354	18.9911	19.3874	0.0057767	3.73385
FBgn0033224	Nop17l	169.379	187.938	185.62	46.2135	57.6737	44.4911	72.3848	78.7442	79.8845	134.915	129.657	127.611	5.15536e-05	3.65914
FBgn0026309	aft	50.9833	57.0607	41.46	13.5305	16.5639	10.849	36.5548	47.1517	46.6902	60.4265	55.3734	52.5196	0.00169868	3.65148
FBgn0033210	U2A	301.734	327.982	452.362	106.36	115.802	76.0067	97.0858	107.668	112.619	109.157	112.312	106.43	0.00552187	3.62909
FBgn0033206	DCTN4-p62	112.276	98.3177	73.1046	28.0741	29.2147	23.4892	42.1144	52.5407	52.6763	83.8981	88.554	82.0404	0.00430345	3.51208
FBgn0037802	Sirt6	25.9632	33.6521	34.7107	8.23596	11.1967	7.53102	21.4584	24.1199	28.6932	54.6367	49.0077	50.7658	0.00165382	3.49827
FBgn0039450	Yif1	232.374	180.452	207.282	66.6438	54.2071	57.9492	55.3493	67.6302	66.3937	82.0087	83.126	83.5776	0.000677237	3.46816
FBgn0035422	RpL28	1451.85	1696.04	1506.92	376.171	521.563	451.431	5374.09	4618.05	4482.72	1532.22	1831.96	1806.17	0.000204577	3.45015
FBgn0019936	RpS20	3699.45	2780.68	3113.68	794.284	1043.13	943.32	10472.8	8437.41	8388.38	2990.81	3281.95	3367.89	0.00122444	3.45011
FBgn0266667	Exo70	47.3748	44.4934	47.2454	16.1711	14.1819	10.0372	26.208	27.5781	28.0114	35.6281	41.4237	36.1511	8.57975e-05	3.44425
FBgn0032216	Usp14	646.338	821.846	834.152	246.934	231.225	196.112	319.371	340.981	344.724	346.339	366.405	332.146	0.000967747	3.41455
FBgn0028670	Vha100-2	119.763	84.9124	106.592	27.6891	29.5907	34.0745	62.8155	88.1932	88.0874	273.885	261.728	254.253	0.00208627	3.40726
FBgn0035372	CG12093	85.9132	100.449	128.208	35.6239	30.422	26.6411	29.7317	34.1522	37.4897	50.4635	53.4039	51.71	0.00430134	3.3939
FBgn0035312	CG15820	39.3296	32.158	43.3795	11.0489	8.31746	14.48	10.1481	17.9815	19.0683	38.1591	39.6664	40.8689	0.00193875	3.39379
FBgn0266670	Sec5	43.0351	35.3578	52.4926	13.0126	12.8464	12.8773	33.5203	36.4618	33.828	39.3168	34.4963	32.5124	0.00344507	3.37888
FBgn0261987	Pxt	10140	9318.7	9787.56	3625.7	2758.27	2293.52	1835.05	1782.9	1695.13	890.257	737.227	770.634	0.000115153	3.37036
FBgn0051249	CG31249	142.244	223.099	157.831	61.9425	57.4579	37.8099	78.3951	87.6763	87.1721	101.893	108.076	103.025	0.00917926	3.32786
FBgn0264978	Slh	78.8815	55.2328	76.1779	27.9421	18.6801	16.6549	48.5667	49.5123	49.2296	51.9096	50.4293	50.5241	0.00401263	3.32335
FBgn0038950	CG5382	40.5827	32.9228	40.9537	14.9788	5.7557	13.708	58.153	54.8799	53.0191	58.0746	58.9496	55.4803	0.00238246	3.3232
FBgn0259481	Mob2	66.2092	57.3026	47.4715	14.1986	20.7298	16.7794	47.4259	47.1435	44.2528	60.1996	67.1307	65.6005	0.00227286	3.30672
FBgn0036450	Tdrd3	158.919	191.785	151.894	53.9924	53.6332	45.8069	58.3145	61.7502	62.4956	74.7244	85.6286	75.5609	0.000759125	3.2757
FBgn0031392	AIF	175.133	198.113	203.542	63.9084	66.5361	47.337	58.806	71.8889	75.2942	125.634	129.51	119.007	0.00023042	3.24436
FBgn0030500	Ndc80	132.739	101.92	136.423	45.1198	38.8744	30.4763	69.1068	74.7895	71.5364	82.9748	78.3323	73.8753	0.0018816	3.24171
FBgn0039013	CG4813	40.5553	27.4459	43.8833	8.17675	13.3506	13.0043	34.4088	35.1224	41.5801	66.9458	61.3559	62.3286	0.00818375	3.24006
FBgn0033916	Usp20-33	41.4635	43.2502	49.5868	11.8774	12.4596	17.2152	30.7587	37.2887	39.5926	90.5163	86.1117	79.6864	0.000492876	3.23209
FBgn0036689	CG7730	199.839	207.337	219.153	63.121	65.5656	66.262	86.2231	90.4982	89.5738	105.511	110.127	104.617	1.468e-05	3.21279
FBgn0015544	spag	219.4	247.126	222.036	87.1301	60.0444	68.2028	69.868	81.5224	79.6742	98.5684	101.844	94.2729	0.000189357	3.19701
FBgn0263603	Zn72D	259.717	226.042	330.255	97.5726	77.0326	80.9987	74.8966	71.5443	71.3253	60.8504	63.0066	59.9237	0.00397861	3.19249
FBgn0015351	CG14906	65.466	39.8808	58.0124	18.8629	16.7136	15.751	18.5941	17.2243	16.4536	22.6821	18.3867	18.7933	0.0081615	3.18269
FBgn0029929	CG4593	71.9787	64.2098	78.0312	26.0794	22.8729	18.4459	82.4946	92.6518	98.6666	127.444	141.452	125.298	0.000431375	3.17842
FBgn0025808	Rad17	147.21	115.797	152.646	41.7195	43.25	47.4942	51.7029	55.0387	51.3384	62.5747	60.6851	57.4627	0.00124636	3.13786
FBgn0025832	Fen1	202.331	172.427	180.695	76.158	58.035	43.4481	94.2069	99.9336	97.464	83.9266	95.0012	94.2986	0.000635382	3.12683
FBgn0020272	mst	54.7975	36.8854	43.242	15.9716	14.9203	12.59	36.6815	39.9897	36.0063	56.9369	61.3551	57.4309	0.00464902	3.10301
FBgn0035591	CG4611	42.2238	34.0807	48.2975	14.2782	11.6611	14.3049	18.8277	22.1511	22.3501	29.3311	28.8909	25.9304	0.00261405	3.09614
FBgn0040290	RecQ4	165.321	188.839	185.427	61.4564	64.3725	49.1608	114.04	127.36	118.692	113.856	104.236	96.7295	0.000151818	3.08353
FBgn0030655	CG9213	150.976	130.875	117.772	36.4001	44.8713	49.0472	42.7042	43.6019	43.1332	45.0975	49.3104	46.088	0.000971772	3.06651
FBgn0086687	Desat1	415.233	366.472	516.652	140.135	139.925	143.618	188.744	249.335	262.119	426.777	459.762	468.974	0.0027475	3.06449
FBgn0027565	CG5498	77.3402	80.3727	58.5092	24.7558	25.5196	20.3475	44.3637	63.39	60.1832	114.442	119.122	108.652	0.002304	3.06164
FBgn0041147	ida	30.1809	28.2404	19.9254	10.2096	7.68963	7.71719	20.9007	23.6883	24.0514	43.9415	45.3037	39.6463	0.0056887	3.05846
FBgn0037203	slif	302.701	301.997	378.697	125.638	106.07	90.4238	72.1603	97.7097	104.733	224.656	230.097	217.293	0.00129854	3.05277
FBgn0039835	mRpL32	334.01	302.102	389.029	88.9922	120.466	126.524	82.8912	83.2094	80.7429	87.9772	83.5094	87.6004	0.00119058	3.05118
FBgn0038968	CG12499	186.795	195.408	167.631	60.6719	65.3672	55.1606	122.604	136.73	138.473	131.243	109.462	109.011	0.000147397	3.03441
FBgn0002719	Men	461.602	423.31	588.964	186.767	174.32	131.291	141.541	147.304	143.102	160.875	156.159	147.615	0.00345327	2.99339
FBgn0038772	mdlc	110.655	121.314	152.48	30.872	49.7156	52.4631	63.269	74.0183	70.5939	107.97	123.701	114.024	0.00419505	2.88949
FBgn0266465	GckIII	201.166	172.922	233.366	74.4326	63.0216	73.9583	48.415	48.6614	48.836	49.776	53.601	49.8402	0.00178434	2.87331
FBgn0038989	CG6937	302.251	315.064	395.541	131.691	119.234	101.811	183.371	186.733	191.958	234.397	261.177	243.016	0.00194659	2.87143
FBgn0052626	AMPdeam	467.267	386.867	441.279	130.28	124.455	197.628	157.311	165.505	159.221	164.663	158.893	155.963	0.00108659	2.86366
FBgn0013674	mt:CoI	5019.03	5028.08	3695.36	1105.19	2094.5	1655	12481.3	15491.6	15411	9643.8	8067.94	8310.4	0.00492901	2.83077
FBgn0022786	Hira	45.0464	50.1356	64.9895	18.3983	20.0335	18.3506	52.856	59.8505	56.368	87.6305	78.0715	71.1993	0.00457583	2.8208
FBgn0028895	CG17328	49.511	33.0327	46.0582	16.4243	16.2259	13.7852	14.3393	23.5159	20.1024	51.2049	45.5578	43.5971	0.00575922	2.76948
FBgn0034401	MetRS	262.811	234.534	300.949	109.978	99.9259	78.5614	133.16	128.432	124.862	130.584	118.761	114.233	0.00135093	2.76738
FBgn0029861	CG3815	48.7366	38.9213	56.3358	17.6468	21.528	13.0868	36.321	41.9841	42.252	76.5986	76.1824	71.5852	0.00546907	2.75525
FBgn0004380	Klp64D	17.6941	15.268	16.358	5.92217	7.51911	4.67279	17.1721	23.3229	25.5758	81.6658	73.8265	72.6651	0.000654408	2.72275
FBgn0011666	msi	307.217	225.435	311.608	119.291	100.197	95.1153	65.5559	79.8024	74.8776	128.202	136.807	133.288	0.00366725	2.68357
FBgn0024993	CG2662	26.7425	41.5128	33.3852	11.4901	11.8572	14.7717	36.2992	42.8024	43.6849	53.1701	61.7627	58.4063	0.00853958	2.6664
FBgn0284253	LeuRS	221.399	212.648	208.616	87.9011	87.8489	66.7169	138.109	134.588	139.303	139.361	126.072	115.55	7.57263e-05	2.65052
FBgn0033993	CG8089	18.5831	15.5593	15.0985	8.7441	7.28951	2.59685	16.1879	17.5468	21.2748	32.0843	30.5528	27.3371	0.00903992	2.64303
FBgn0002887	mus201	31.7304	35.1818	28.7629	12.3041	13.2134	10.7661	25.8778	28.6891	29.3096	55.7181	47.911	42.6599	0.000570569	2.63687
FBgn0260755	CG42553	23.4976	31.0982	30.9268	10.9711	11.5811	9.88285	16.2648	23.7854	22.6609	34.579	35.5217	32.1444	0.00227861	2.63673
FBgn0032171	CG5846	24.8217	34.3695	29.4318	14.0297	10.8337	9.24014	15.95	26.9185	23.6672	38.6255	42.6867	38.6336	0.00420477	2.59865
FBgn0036987	CG5274	103.007	112.656	90.6579	36.7882	46.3557	36.756	33.563	38.9096	37.9547	39.9985	38.6354	39.5087	0.000950875	2.5548
FBgn0031600	CG3652	128.162	175.664	165.843	52.5137	73.8029	58.1856	52.4762	63.4192	70.5136	83.1953	91.2946	89.4896	0.00385768	2.5456
FBgn0263593	Lpin	58.8991	49.4101	47.1153	22.8409	19.1154	19.2164	31.5476	35.3591	33.3582	45.9999	43.5036	42.5879	0.0011788	2.54075
FBgn0039379	CG5886	137.257	143.501	154.862	62.1568	53.5282	56.1529	49.945	60.3415	60.4865	116.071	116.292	104.476	0.000106753	2.53507
FBgn0001108	DCTN1-p150	112.226	149.144	142.271	64.7028	58.0309	42.6508	54.6506	54.9805	58.0941	110.882	99.4833	91.1881	0.00371819	2.44062
FBgn0004419	me31B	7841.41	7474.7	6941.82	3202.46	3038.03	2908.71	1919.39	2176.91	2209.8	4361.43	4037.13	3782.38	9.12326e-05	2.43277
FBgn0038870	Oga	91.098	89.6316	112.342	41.7686	41.2137	37.8809	52.848	57.7485	58.0779	61.5904	62.7582	57.8493	0.00151727	2.42482
FBgn0030789	Rrp45	84.4107	65.9989	88.7961	37.3428	37.4493	24.5026	44.6723	45.6916	45.474	65.7951	69.3752	72.8274	0.0047202	2.40905
FBgn0015376	cutlet	53.2898	44.2225	44.417	18.6863	21.7854	18.5106	32.5083	37.7344	38.2487	61.3707	57.2178	51.3241	0.000956442	2.4063
FBgn0042178	Apl	157.79	176.325	163.644	57.6734	56.7894	92.7192	164.661	120.415	124.735	174.424	117.536	114.429	0.00175138	2.40252
FBgn0051648	CG31648	14.2199	12.0663	14.1742	6.12285	6.82834	3.89378	16.9835	29.2778	27.6481	39.9298	43.2001	38.6739	0.00226461	2.40192
FBgn0033971	CG10209	47.9188	61.5253	46.572	26.9568	15.492	22.7984	39.8715	43.4105	42.1001	53.0194	54.4627	54.2629	0.00657872	2.39116
FBgn0037689	CG8135	31.8808	32.8699	41.8185	15.0832	16.1097	13.5801	13.2133	17.9251	17.7047	45.8959	49.2093	46.433	0.00315456	2.38021
FBgn0033258	CG8712	82.5295	107.014	87.4341	44.082	36.865	35.4954	32.6528	41.5443	44.8836	71.257	86.0512	71.7829	0.00252534	2.37867
FBgn0033194	Vps13	57.0109	70.6031	51.7286	22.7261	30.4271	22.3795	36.6085	37.6215	34.4416	34.6854	27.3718	25.0616	0.00506885	2.37437
FBgn0032157	Etl1	133.818	165.59	169.418	77.7474	65.5067	54.4731	133.897	143.21	144.772	153.62	143.989	137.258	0.00233791	2.37108
FBgn0032705	Grip71	177.707	153.107	149.165	67.2784	70.8743	64.333	70.1882	89.57	91.5201	176.406	177.264	167.694	0.000533891	2.37043
FBgn0038016	MBD-R2	76.0521	96.1958	69.8013	32.5601	37.3281	32.5778	53.347	55.4403	55.3081	71.6729	77.3412	72.2964	0.00459311	2.36224
FBgn0087040	alphaTub67C	1100.71	802.153	1161.69	533.007	426.596	340.064	683.23	704.822	707.278	606.459	650.037	631.496	0.00908796	2.35796
FBgn0028734	Fmr1	253.154	247.767	272.191	111.361	127.808	92.9341	112.124	132.291	134.656	237.014	279.776	245.425	0.000299482	2.32792
FBgn0086443	AsnRS	352.852	320.689	431.687	191.498	166.061	117.981	177.334	125.037	161.842	147.7	148.614	141.895	0.00597272	2.32415
FBgn0284252	Letm1	132.914	128.26	147.375	66.4529	59.5958	50.0108	40.5717	44.4388	48.9136	92.1663	88.3802	79.2561	0.000488304	2.32052
FBgn0035033	CG3548	77.1365	83.5709	95.5369	38.8594	38.5179	33.4531	44.2672	48.8535	48.8318	82.8406	90.8518	87.0782	0.00102608	2.31204
FBgn0261065	Cpsf73	99.1273	112.365	133.047	60.3694	56.5763	32.4667	76.838	78.8124	82.1032	90.5471	85.1781	82.272	0.00784923	2.30597
FBgn0001092	Gapdh2	5866.38	4713.07	5700.57	2826.17	2295.43	1941.85	1854.92	1872.5	1919.83	2026.76	2275.43	2146.01	0.0022569	2.30482
FBgn0036663	CG9674	69.0572	67.2486	71.6991	37.2416	31.0254	23.8236	43.9246	36.217	34.611	37.7642	27.9905	25.8273	0.000697956	2.2587
FBgn0262937	Rabex-5	41.7708	45.1257	43.4399	22.549	19.0446	16.1724	27.4045	28.9323	27.7281	51.1237	53.9029	48.7947	0.00031398	2.25628
FBgn0001226	Hsp27	17532.9	17002.1	20107.5	9310.27	8285.9	6637.15	1279.19	1561.88	1605.78	1146.6	1494.9	1399.2	0.00120192	2.25485
FBgn0051040	Cog7	23.3301	17.0404	17.394	9.05703	10.1676	6.56467	18.0558	18.2161	19.0096	34.3866	33.0181	31.6073	0.00980063	2.23986
FBgn0030973	CG7332	299.499	248.308	363.21	143.362	126.925	136.794	101.762	107.103	106.734	129.954	118.531	125.442	0.00747537	2.23792
FBgn0030501	BthD	223.992	180.936	180.466	95.5862	82.0298	86.2329	146.201	151.681	154.179	149.512	186.104	162.92	0.0020176	2.21867
FBgn0039175	beta-PheRS	184.604	170.166	209.956	104.999	89.5139	62.6297	84.8419	100.931	98.3284	84.0458	87.9335	82.322	0.00379646	2.19616
FBgn0010379	Akt1	168.555	222.524	179.063	78.9916	98.8109	83.457	84.4886	111.376	107.187	205.499	202.662	192.195	0.00423776	2.18228
FBgn0032261	CG6094	96.3168	76.7867	106.325	51.4747	35.7516	41.2228	25.3817	27.3627	28.8804	41.2746	52.4047	49.705	0.00686685	2.1754
FBgn0261530	nbs	61.1967	60.0635	69.2241	28.8488	32.5744	26.2756	35.8498	43.1047	42.1605	76.3932	72.1742	97.5265	0.000554414	2.17203
FBgn0042177	Arts	188.552	205.731	186.786	85.1245	75.6156	107.12	245.801	250.875	254.385	264.399	247.261	231.821	0.000715883	2.16931
FBgn0031549	Spindly	95.4782	102.137	80.9741	52.5848	48.6116	28.2898	45.6786	47.139	46.5149	57.4195	52.4469	52.9435	0.0070707	2.1515
FBgn0017551	Rca1	395.95	411.93	478.575	218.381	201.509	178.95	199.467	220.326	213.765	182.542	194.371	193.296	0.00117402	2.14824
FBgn0032350	CG6287	197.876	185.132	148.695	69.126	88.706	90.9192	143.34	152.52	151.866	238.036	264.77	244.967	0.00441512	2.13749
FBgn0038889	Fancm	11.8831	16.2717	14.5141	8.39378	6.43382	5.26269	19.9088	24.794	26.5865	54.7653	44.0899	40.3206	0.0086599	2.12386
FBgn0034853	Ice1	63.4423	79.3249	77.7128	35.2677	34.0056	34.7614	67.7949	71.7292	70.9548	103.878	88.643	88.3715	0.00155302	2.11929
FBgn0037297	CG1116	41.0632	32.2122	35.2592	16.7838	14.144	20.6234	47.5401	43.0423	45.2228	44.0552	60.5072	48.3147	0.00406616	2.10537
FBgn0011761	dhd	34467.3	34717.4	39842.4	19907.6	18825.8	13901.8	7935.06	8263.58	8318.81	7591.46	6944.11	6361.39	0.00179504	2.07138
FBgn0262732	mbf1	1656.46	1735.32	1435.35	731.636	791.047	821.551	368.41	366.4	385.196	387.168	400.941	411.885	0.000902507	2.05915
FBgn0038810	Srp72	98.0072	82.4073	87.4126	51.6595	46.1106	32.4311	47.6822	57.7035	59.9036	69.292	71.1689	68.4019	0.00333207	2.05703
FBgn0051961	TBCC	182.833	186.56	181.546	79.9429	92.5809	98.323	58.3538	61.3544	59.0016	86.9729	80.8835	74.2933	7.76255e-05	2.03414
FBgn0039145	CG6000	362.706	318.031	273.961	148.593	177.954	144.831	52.8424	68.0046	66.7189	69.9926	75.0418	66.2606	0.00433653	2.02533
FBgn0022343	CG3760	312.51	255.29	330.121	166.853	148.328	128.462	107.095	136.123	148.588	192.504	225.842	205.027	0.00383972	2.02397
FBgn0029970	Nek2	129.284	126.413	128.427	68.2517	64.4763	59.1577	54.2561	58.7787	58.4058	82.2743	78.4427	77.6295	2.07414e-05	2.00184
FBgn0262619	DNAlig1	165.89	201.339	202.763	108.579	94.0862	85.8508	80.007	89.4893	91.311	110.588	104.663	99.1685	0.00242448	1.9756
FBgn0034629	Acox57D-d	63.602	50.7971	53.8349	29.0871	32.7469	24.1356	37.5901	40.5869	41.2689	63.1608	69.8331	67.117	0.00397163	1.9569
FBgn0035679	CG10467	100.007	75.83	85.6719	44.3569	46.8811	42.6703	40.8154	34.8937	35.2537	38.4168	37.384	40.8042	0.00395598	1.9529
FBgn0033339	Sec31	221.085	196.861	223.239	122.953	105.85	99.8167	95.4619	92.0195	91.7436	93.3914	81.2365	80.5937	0.000677006	1.95114
FBgn0002542	lds	229.8	210.169	255.636	127.034	120.816	109.046	122.667	137.2	141.031	237.459	213.256	204.414	0.00134911	1.94904
FBgn0030734	CG9911	323.997	337.958	353.177	206.376	175.422	140.065	133.849	151.548	151.892	156.74	148.502	140.871	0.00141796	1.94521
FBgn0260780	wisp	328.538	298.924	373.092	172.937	171.884	177.853	164.157	179.617	181.349	366.163	365.009	349.56	0.00181232	1.9143
FBgn0027093	ArgRS	154.897	154.756	124.029	83.7185	86.1356	58.9838	72.4132	73.7881	70.3016	110.764	104.962	97.5445	0.00708014	1.89515
FBgn0034936	Stoml2	154.227	156.776	192.235	76.587	88.9752	101.91	74.3107	92.5496	87.8959	115.954	118.455	110.547	0.00531639	1.88146
FBgn0026418	Hsc70Cb	1098.95	1080.43	1123.68	664.265	592.253	512.974	303.46	336.14	332.661	421.398	419.91	405.348	0.000356013	1.86667
FBgn0031639	mRpS2	148.556	117.587	164.611	80.3805	74.5659	76.7623	45.5511	57.1616	55.2338	74.718	77.3124	78.0751	0.00882763	1.85903
FBgn0266668	Exo84	78.8679	70.9047	75.9015	40.43	43.4993	39.9266	39.6551	39.4171	36.4445	38.0272	40.4757	37.744	0.000192248	1.82207
FBgn0035714	CG8549	53.2873	65.1225	71.6034	37.2897	37.6711	30.5155	36.1435	48.5039	47.3276	78.8516	96.3134	87.5833	0.0085127	1.80148
FBgn0033672	rho-7	58.168	64.9715	61.179	27.2645	32.6901	43.5061	35.3055	44.3995	42.606	67.3691	73.3894	65.4824	0.00642916	1.78153
FBgn0029818	GAA1	45.254	48.2804	54.892	34.4014	27.2314	21.7958	73.3451	79.8589	77.7792	76.9734	77.6161	73.1896	0.00944101	1.77908
FBgn0038619	CG7685	76.8487	58.7911	69.5818	39.4321	37.12	39.1927	22.5979	19.7986	24.1228	23.1901	30.0367	27.8783	0.00489396	1.77305
FBgn0039417	CG6073	46.4922	58.3467	58.6426	32.379	29.3257	30.7138	37.5588	39.3442	40.3271	86.1686	77.7702	76.4381	0.00444905	1.76893
FBgn0036180	Duba	170.271	168.257	162.722	102.257	99.2104	82.5503	63.3057	84.8981	70.1837	133.61	110.738	103.932	0.000375566	1.76485
FBgn0032445	CG6153	108.305	116.586	101.315	49.3186	61.8031	74.024	25.8857	46.1491	47.0642	64.4576	73.9801	70.8083	0.00497238	1.76189
FBgn0260771	Larp7	103.593	91.3295	103.549	64.5123	52.676	58.0373	57.3758	69.7783	71.1686	123.93	121.274	119.839	0.00151988	1.70335
FBgn0085423	GramD1B	48.7001	55.8839	50.1177	26.5021	30.9683	33.8623	31.332	36.2337	38.1544	64.5868	61.2008	59.8682	0.00233071	1.69383
FBgn0026402	NiPp1	136.568	149.224	141.014	78.4889	83.2482	90.5919	42.2661	42.0514	44.7772	70.4254	74.29	70.7278	0.000340458	1.69147
FBgn0036318	Wbp2	132.782	147.716	117.51	64.9094	81.6212	89.0333	30.9198	35.0264	31.3853	49.0724	50.1386	49.3027	0.00860998	1.6896
FBgn0040754	CG17059	937.059	816.772	905.987	451.431	482.002	642.043	60.0713	63.8712	71.4097	54.0287	63.5648	61.9995	0.0064238	1.68826
FBgn0260817	gkt	163.549	150.46	156.027	103.61	88.8322	88.6278	60.607	54.1088	60.5277	85.8828	86.8301	81.6554	0.000543287	1.67231
FBgn0040752	Prosap	105.997	110.215	127.133	75.8109	68.7607	64.7465	67.9005	72.6594	72.1282	101.612	88.5866	88.4199	0.00347137	1.6403
FBgn0039141	spas	28.2875	25.4216	23.0961	17.9533	15.5792	13.6136	23.3352	29.3191	31.2816	82.1746	82.5766	79.9111	0.00721597	1.62909
FBgn0033486	dmpd	22.6127	22.8706	21.5406	16.2951	13.3811	11.5211	31.5886	45.8271	47.338	119.861	129.254	121.408	0.00401223	1.6269
FBgn0034617	Panx	132.183	142.673	135.348	87.4193	85.3586	81.4443	53.0934	55.0562	55.7269	68.7759	63.6028	61.2262	0.000128788	1.61356
FBgn0028962	AlaRS-m	21.9448	21.3812	17.4354	13.123	12.8371	11.7248	34.6057	36.1413	36.2346	40.7456	35.8657	34.2399	0.00654796	1.61235
FBgn0034964	IntS1	54.9998	60.5661	67.3357	43.5301	39.2916	32.1637	34.8592	43.428	42.957	76.9899	60.3623	56.5647	0.00967347	1.59065
FBgn0033740	dgt5	73.6983	76.2384	73.053	49.2621	51.7564	40.1093	39.8743	44.614	44.9681	84.6453	78.0009	72.8172	0.00175024	1.58006
FBgn0010488	NAT1	1642.18	1650.32	1708.37	1091.54	1070.75	1004.8	635.123	639.402	632.779	483.204	387.766	360.325	5.26619e-05	1.57901
FBgn0039640	CG14516	354.96	340.868	366.614	270.91	213.203	194.52	197.166	232.17	231.286	324.972	294.303	297.135	0.00611131	1.56556
FBgn0011606	Klp3A	210.494	186.379	219.738	150.408	132.885	116.231	92.3366	99.4401	98.057	132.344	111.71	106.409	0.00667234	1.54336
FBgn0015795	Rab7	477.508	479.04	573.189	308.489	362.616	322.755	90.7794	110.363	111.236	148.338	165.67	152.841	0.00735838	1.53919
FBgn0036764	CG5535	338.652	313.702	377.809	236.546	230.617	203.011	112.043	114.158	107.843	107.831	93.3349	103.69	0.00490765	1.53716
FBgn0035997	phol	71.6848	83.4252	81.9652	53.0307	56.6585	46.5203	49.2923	64.4028	68.7368	191.098	201.698	188.094	0.00471234	1.51768
FBgn0044511	mRpS21	856.003	887.739	813.147	492.33	570.655	648.23	159.648	170.421	163.637	165.567	159.624	136.285	0.00484547	1.4942
FBgn0029936	CG4617	92.5307	77.3165	85.2808	61.1489	59.5154	51.6461	37.3009	42.7498	42.9787	64.3015	71.7031	67.5297	0.00640319	1.48063
FBgn0026083	tyf	367.843	291.311	350.289	226.043	223.743	232.204	124.444	138.091	136.55	252.87	244.067	218.668	0.00939271	1.48014
FBgn0034062	CG8388	24.4871	22.4164	25.407	13.8586	17.2027	18.0349	13.4801	12.8209	12.9413	17.9792	19.4936	19.2702	0.00757752	1.47283
FBgn0036671	CG9951	60.7215	54.8273	54.1285	42.7565	40.8536	32.3434	42.0815	44.5372	44.4016	60.5445	58.9135	60.764	0.00942409	1.46332
FBgn0285926	Imp	440.306	398.034	400.975	297.337	299.386	251.189	149.646	177.064	177.619	237.123	248.502	233.349	0.00330657	1.46161
FBgn0262126	Sec24CD	117.033	105.251	116.996	77.1819	83.2455	71.8613	44.4799	50.1501	46.7946	94.3402	87.6979	84.3999	0.00222952	1.4606
FBgn0086358	Tab2	106.468	102.866	99.0707	71.9504	69.3253	74.2286	49.7045	62.1227	58.6217	106.046	113.322	116.824	0.000269094	1.43108
FBgn0036893	PIG-F	201.673	184.972	213.148	150.595	147.059	126.155	33.6633	42.5936	44.5278	66.3674	72.4829	63.4525	0.00631774	1.41524
FBgn0035603	Pfdn4	1126.35	982.036	1120.19	720.48	715.239	850.668	275.029	227.315	245.593	279.084	273.968	251.474	0.00829867	1.41209
FBgn0050496	CG30496	42.2127	43.011	42.9492	32.7583	33.8315	31.1785	17.5284	20.7421	19.037	25.612	26.0044	23.5188	0.000237047	1.31099
FBgn0034618	CG9485	26.2741	25.3148	25.9332	21.1325	20.8053	19.1908	35.1661	42.124	42.9324	107.168	103.553	92.6406	0.00117916	1.26818
FBgn0033935	Sin1	90.9792	90.1186	97.0965	72.2013	74.5643	76.7649	43.0168	49.2562	51.6548	64.0654	67.325	64.5801	0.00206383	1.24455
FBgn0003449	snf	1001.46	992.439	1002.96	799.182	831.909	900.399	183.503	200.565	199.942	221.748	213.742	218.319	0.00664952	1.18383
FBgn0038809	CG16953	82.0867	82.184	83.7504	67.339	74.0813	72.7407	46.6253	53.9778	58.5834	97.4219	105.108	107.53	0.00609183	1.15811
