# Supplementary material for: Prolonged ovarian storage of mature Drosophila oocytes dramatically increases meiotic spindle instability
Source: eLife. 2019 Nov 22;8:e49455. doi: 10.7554/eLife.49455 (PMC6905857; doi:10.7554/eLife.49455)
Supplement: Supplementary file 3. [file elife-49455-supp3.xlsx]

## Sheet: Sheet1
Table S3	Genes upregulated during oocyte maturation
		Ribosome profiling TPM value					mRNA-seq TPM value
Flybase ID	Gene symbol	oocyteA	oocyteB	oocyteC	growing folliclesA	growing folliclesB	oocyteA	oocyteB	oocyteC	growing folliclesA	growing folliclesB	ttest	fold-change
FBgn0011761	dhd	34467.3	34717.4	39842.4	347.935	241.998	7935.06	8263.58	8318.81	767.736	806.487	0.000536972	123.208
FBgn0036428	Gbs-70E	228.638	293.885	214.18	3.19104	4.82857	139.596	172.923	180.043	15.2713	15.1591	0.00467277	61.2418
FBgn0036689	CG7730	199.839	207.337	219.153	6.22864	1.58652	86.2231	90.4982	89.5738	4.53754	3.29268	0.000106015	53.4284
FBgn0017551	Rca1	395.95	411.93	478.575	18.7304	10.1524	199.467	220.326	213.765	13.5925	13.9103	0.00107158	29.6938
FBgn0010431	mtrm	6766.57	6555.6	6781.62	336.094	148.602	969.86	1012.69	1050.58	101.283	94.3637	1.31865e-05	27.6514
FBgn0000140	asp	228.602	257.367	265.268	7.1591	11.4817	109.2	135.298	135.258	5.77052	7.62488	0.000470968	26.8672
FBgn0001086	fzy	1041.42	1021.12	1249.25	40.974	43.8523	185.322	208.672	189.961	11.6766	14.1655	0.00149452	26.028
FBgn0001120	gnu	1137.28	982.678	1321.17	73.7666	27.8574	252.776	289.575	304.532	152.223	186.41	0.00330463	22.5742
FBgn0086711	mol	187.836	193.752	252.805	8.98739	10.669	95.3448	112.222	117.856	2.36819	2.7329	0.00485786	21.5161
FBgn0015625	CycB3	202.981	241.849	221.607	12.8361	10.8033	181.574	200.315	207.51	16.85	15.4999	0.00071174	18.7945
FBgn0035812	CG7457	15.298	14.1472	17.0877	0.983247	0.815662	21.7092	30.9952	32.767	10.4335	14.7382	0.000937636	17.2449
FBgn0266101	CG44838	62.7033	69.7863	49.6501	3.92073	4.47388	42.2486	49.6373	52.429	6.79754	8.53335	0.00506394	14.4648
FBgn0000996	dup	662.035	699.293	678.954	49.4132	49.8748	163.408	189.096	196.408	15.7996	19.3721	2.36251e-05	13.6994
FBgn0026257	cav	183.306	168.268	122.809	13.2474	10.4493	112.762	113.734	122.952	29.4846	21.5434	0.00835952	13.346
FBgn0013765	cnn	149.562	201.147	141.439	10.5858	14.357	61.0539	78.3641	76.9707	6.63499	6.695	0.00819213	13.154
FBgn0037781	Fancl	148.073	128.034	127.582	10.7479	12.556	40.6104	34.4969	34.4479	5.98431	2.84762	0.000780898	11.5486
FBgn0033773	Mos	147.384	162.522	116.891	11.8061	13.3083	99.1734	102.223	108.129	34.7307	28.5115	0.00494242	11.3294
FBgn0034021	CG8180	191.586	220.477	243.35	16.1902	24.3894	169.334	199.617	205.024	19.2987	32.6292	0.00205273	10.7675
FBgn0266521	stai	2059.6	2761.87	2103.49	236.594	216.178	478.976	509.373	501.584	58.7917	51.1051	0.00575325	10.1964
FBgn0000927	fs(1)Ya	398.432	355.906	498.797	43.2182	38.8038	223.786	247.874	240.49	39.5387	62.8455	0.00627607	10.1854
FBgn0053828	His1:CG33828	11.041	12.6507	10.3306	0.189024	2.09595	74.1642	95.9428	110.708	0.257643	0.119167	0.00291594	9.92638
FBgn0010342	Map60	475.956	490.816	438.955	45.708	49.8977	138.094	165.556	170.931	17.4842	17.5448	0.000233752	9.80226
FBgn0002673	twe	177.394	156.892	161.603	16.5563	17.4515	104.206	129.568	134.677	11.1666	11.0414	0.000344009	9.72111
FBgn0024991	CG2694	56.4231	48.1534	51.3942	3.46566	7.58078	49.7778	62.3702	64.7053	5.06266	5.24871	0.000895565	9.41302
FBgn0039640	CG14516	354.96	340.868	366.614	49.5069	25.7962	197.166	232.17	231.286	36.7543	38.0349	0.000153807	9.40593
FBgn0038889	Fancm	11.8831	16.2717	14.5141	1.14793	1.88859	19.9088	24.794	26.5865	3.23808	2.50789	0.00470761	9.36796
FBgn0027504	CG8878	85.1993	98.3888	120.661	7.08448	16.3828	48.5026	52.1372	59.5114	6.24463	6.82578	0.0074008	8.64321
FBgn0038252	BigH1	1978.71	2217.63	1555.69	237.366	208.614	465.131	526.675	523.757	180.482	183.659	0.00657119	8.59834
FBgn0261987	Pxt	10140	9318.7	9787.56	1310.4	1025.91	1835.05	1782.9	1695.13	202.053	208.266	0.000119097	8.34541
FBgn0037203	slif	302.701	301.997	378.697	52.8248	28.5041	72.1603	97.7097	104.733	21.6437	26.7968	0.00350942	8.06105
FBgn0002948	nod	278.624	288.622	313.392	30.0027	43.0828	101.152	115.007	115.771	12.699	16.4134	0.000368239	8.03295
FBgn0261841	pre-mod(mdg4)-AD	28.738	21.0608	24.0725	1.53179	5.32768	9.50352	9.35602	8.57719	0.487656	3.27191	0.00708239	7.1795
FBgn0003475	spir	92.9036	93.7803	106.209	11.6818	16.0726	43.8713	45.5892	42.7765	5.45481	7.09971	0.000713737	7.03536
FBgn0011606	Klp3A	210.494	186.379	219.738	14.9772	44.5392	92.3366	99.4401	98.057	8.59536	10.7526	0.00190203	6.90691
FBgn0040290	RecQ4	165.321	188.839	185.427	26.9035	26.6993	114.04	127.36	118.692	6.62346	6.82578	0.000515634	6.71092
FBgn0260780	wisp	328.538	298.924	373.092	53.071	49.9644	164.157	179.617	181.349	34.2077	31.2687	0.00205213	6.47385
FBgn0030805	wus	187.254	191.46	248.036	42.3499	22.6754	52.9827	62.0567	60.7905	9.08096	11.6579	0.00679252	6.4257
FBgn0026570	CG5704	41.9082	52.7679	40.9523	6.48462	7.7503	20.4308	22.8565	24.6977	6.67587	6.4559	0.0044669	6.35191
FBgn0014127	barr	269.56	256.158	257.795	34.9466	50.1258	82.7301	89.0459	87.6795	6.39919	6.45734	0.000101784	6.13997
FBgn0033757	muskelin	414.865	444.171	384.641	65.1008	71.0644	204.064	238.84	239.659	32.1122	28.7494	0.000579122	6.08906
FBgn0027500	spd-2	128.669	137.555	145.658	23.2794	22.073	135.527	147.847	146.922	18.7878	20.8919	0.000370858	6.05454
FBgn0028916	CG33090	66.7308	74.1691	87.512	13.8423	11.8764	48.73	60.0475	60.2037	7.05442	7.12803	0.00403587	5.92078
FBgn0032845	CG10747	107.385	93.3271	110.739	16.5139	19.3867	45.2537	32.106	31.8061	7.86477	2.07654	0.00115127	5.78358
FBgn0003943	Ubi-p63E	4441.54	4814.9	4227.88	667.753	889.855	1315.36	1593.97	1572.86	35.0808	45.5261	0.000559736	5.77138
FBgn0025633	CG13366	91.0326	112.565	101.266	16.3564	19.0607	89.2525	102.685	101.832	17.7489	18.7355	0.00191255	5.73854
FBgn0036053	iPLA2-VIA	117.535	118.99	146.204	21.0006	23.4845	80.4176	95.0723	92.4842	12.221	13.0762	0.0031691	5.73569
FBgn0037770	Art4	189.182	185.022	190.068	28.0653	37.8009	49.568	59.0596	62.6474	14.2498	16.2949	4.19988e-05	5.7113
FBgn0030863	CG8188	241.399	325.956	334.73	47.4639	58.6582	67.3373	97.4425	97.4371	21.8613	18.5491	0.00769785	5.66696
FBgn0029879	APC7	291.005	247.732	275.389	58.7587	39.295	205.3	196.802	201.977	36.5438	36.787	0.00111914	5.53523
FBgn0261530	nbs	61.1967	60.0635	69.2241	8.70491	14.759	35.8498	43.1047	42.1605	12.9533	12.7442	0.00127867	5.41211
FBgn0043900	pygo	135.954	170.928	174.838	28.0591	31.9085	48.6211	56.5766	55.076	6.83794	9.01793	0.00386284	5.35533
FBgn0261679	CG42726	38.9017	35.6629	36.4186	6.78426	7.19624	29.322	32.5964	34.743	0.004602	0	0.000167049	5.29229
FBgn0031549	Spindly	95.4782	102.137	80.9741	16.1356	19.0492	45.6786	47.139	46.5149	4.13203	5.05114	0.00267434	5.27859
FBgn0000147	aurA	158.856	128.187	177.524	34.6008	24.4511	59.2489	69.5867	71.3945	16.4853	13.8937	0.00703729	5.24474
FBgn0003701	thr	44.7862	56.0277	45.5774	8.61693	10.3875	55.0664	68.5498	69.2024	3.93467	3.67662	0.00363891	5.13533
FBgn0003015	osk	180.844	177.851	143.223	28.3712	37.0397	119.225	204.321	203.903	228.767	270.182	0.00347106	5.11553
FBgn0034853	Ice1	63.4423	79.3249	77.7128	13.12	15.6971	67.7949	71.7292	70.9548	9.24901	8.23097	0.00292297	5.10068
FBgn0002542	lds	229.8	210.169	255.636	46.9492	45.7931	122.667	137.2	141.031	16.1801	14.7039	0.0016482	5.00027
FBgn0039642	CG11882	134.791	128.707	146.068	22.2374	32.5578	36.3189	33.2175	34.0994	8.90057	12.3598	0.000734901	4.98301
FBgn0010488	NAT1	1642.18	1650.32	1708.37	303.943	365.186	635.123	639.402	632.779	69.5174	87.2364	4.08441e-05	4.98247
FBgn0030421	Agpat1	12.4362	12.4122	9.95913	2.79124	1.87616	12.9934	14.5691	16.0818	0.916651	0.421014	0.00364135	4.97172
FBgn0015600	toc	55.7871	70.0866	77.7453	12.2385	15.0884	23.6193	32.7016	32.4657	3.87808	9.85855	0.00748261	4.96747
FBgn0052823	Sdic3	173.99	153.351	197.081	38.5666	33.4265	42.1014	41.9359	40.8147	1.89035	4.80313	0.00347287	4.85622
FBgn0025808	Rad17	147.21	115.797	152.646	24.9901	32.2599	51.7029	55.0387	51.3384	9.94323	9.9566	0.00532192	4.84021
FBgn0027783	SMC2	137.894	160.419	140.166	24.8865	35.6783	67.9458	72.552	71.8398	8.55212	6.35968	0.00141327	4.82656
FBgn0034158	CG5522	30.9913	40.5739	39.4685	7.57116	7.85899	36.5618	47.1498	47.6473	5.01531	5.33133	0.00492163	4.79726
FBgn0032189	Ripalpha	333.885	428.42	316.451	72.9376	78.727	110.296	124.296	125.868	11.9552	7.7241	0.00803747	4.74185
FBgn0029970	Nek2	129.284	126.413	128.427	28.5788	26.1863	54.2561	58.7787	58.4058	3.71326	3.35725	6.12082e-06	4.67602
FBgn0053499	Sdic4	145.429	144.91	195.326	36.6567	33.3572	39.2001	44.4481	42.9999	3.5944	5.32697	0.00986769	4.62446
FBgn0002901	mus304	32.9327	33.8628	28.1506	6.46457	7.31837	28.6574	30.7062	34.9408	5.97625	5.62929	0.00172913	4.59245
FBgn0250755	CG42233	19.1532	22.3534	26.978	5.402	4.71371	9.20713	12.2876	13.0659	2.15288	1.48086	0.00911212	4.51341
FBgn0032488	CG16812	295.295	320.386	314.595	64.2742	75.4895	113.563	113.538	113.342	17.1823	16.9363	0.000190676	4.43737
FBgn0030034	CG10555	166.025	160.104	171.373	31.3379	43.5176	30.3426	28.6115	28.8888	5.92329	8.24993	0.000244429	4.43077
FBgn0003545	sub	127.687	127.113	123.704	30.453	26.9568	71.0248	85.5056	82.6331	11.1955	12.3511	2.10086e-05	4.39534
FBgn0026143	CDC45L	52.3974	47.7103	65.8522	13.2388	12.638	107.465	118.97	125.266	17.6998	19.4958	0.00912304	4.27565
FBgn0042127	CG18789	358.852	380.123	292.682	66.8586	95.3291	54.7643	70.8776	70.927	6.94718	5.97889	0.0051433	4.24059
FBgn0266111	ana3	10.4739	12.4566	14.3245	2.28579	3.57759	16.9931	23.725	23.914	1.53184	1.55786	0.00820222	4.2359
FBgn0026432	Grip163	41.4674	36.6967	45.9714	9.76327	9.82243	30.1655	30.7537	30.7206	2.40785	2.45131	0.00277137	4.22538
FBgn0086358	Tab2	106.468	102.866	99.0707	21.0728	27.7934	49.7045	62.1227	58.6217	10.2698	13.2366	0.000234913	4.20747
FBgn0030242	sofe	135.823	156.505	149.768	33.0752	38.2436	46.9426	59.0255	62.5934	5.89808	9.53135	0.000823558	4.13257
FBgn0033316	Gle1	122.681	167.041	163.214	35.5656	37.8962	54.6731	66.5616	66.7107	13.2842	14.1592	0.0083441	4.1104
FBgn0033935	Sin1	90.9792	90.1186	97.0965	19.0937	26.503	43.0168	49.2562	51.6548	7.4814	7.0547	0.000395272	4.06746
FBgn0032157	Etl1	133.818	165.59	169.418	42.2277	35.5485	133.897	143.21	144.772	17.1516	19.2326	0.00416066	4.0186
FBgn0002924	ncd	173.405	164.714	194.097	48.2651	41.6297	114.524	121.575	119.18	8.90694	9.17833	0.00141183	3.94696
FBgn0033740	dgt5	73.6983	76.2384	73.053	20.6534	17.4935	39.8743	44.614	44.9681	8.50485	7.40971	6.64125e-05	3.89703
FBgn0031947	CG7154	193.938	207.818	152.763	46.0466	49.0075	113.809	108.56	109.16	16.2378	17.0007	0.00764086	3.88914
FBgn0029856	CG11700	996.848	1022.79	890.885	237.045	262.548	54.8598	74.2532	84.3738	0.50917	13.935	0.000858787	3.88385
FBgn0042125	CG18787	411.287	398.499	329.812	83.9097	112.642	64.8018	84.0844	80.5682	13.0913	8.74038	0.0038049	3.86529
FBgn0036141	wls	116.293	111.446	120.634	36.4226	23.7813	55.0705	62.6198	63.2223	7.2935	8.52951	0.000673586	3.8577
FBgn0036448	mop	182.781	212.265	190.523	44.6605	57.272	85.8816	88.8778	84.3481	7.4117	7.88218	0.00134092	3.82978
FBgn0032105	borr	204.022	216.629	183.072	53.1505	51.9502	92.4983	125.158	131.987	23.2365	27.3265	0.00132091	3.82949
FBgn0033993	CG8089	18.5831	15.5593	15.0985	3.73982	5.0811	16.1879	17.5468	21.2748	2.86619	3.30483	0.00404836	3.72153
FBgn0005596	yem	58.1429	65.106	57.048	17.1573	15.157	72.8253	87.8612	88.7459	9.10704	11.1252	0.000950242	3.71966
FBgn0264492	CkIIalpha	3016.15	3330.43	2502.58	730.364	864.075	614.851	721.032	715.187	271.394	165.992	0.00643899	3.70001
FBgn0034617	Panx	132.183	142.673	135.348	33.8643	41.3449	53.0934	55.0562	55.7269	12.5985	8.28022	0.000261502	3.63612
FBgn0030500	Ndc80	132.739	101.92	136.423	37.9489	30.56	69.1068	74.7895	71.5364	10.1356	9.02858	0.00839133	3.61102
FBgn0011020	Sas-4	51.1122	60.3414	56.6251	14.8041	16.3139	37.677	48.1805	49.8155	5.3133	6.43948	0.00139705	3.6009
FBgn0263600	DNApol-delta	156.61	187.379	179.076	50.336	47.0127	93.247	100.477	101.9	9.01999	6.46319	0.00182644	3.58207
FBgn0267977	mh	82.756	80.1138	80.3763	22.5312	22.8107	36.68	40.4493	42.0822	6.62606	6.76976	1.43111e-05	3.57647
FBgn0032731	Swip-1	131.637	157.856	178.936	41.6581	45.8103	46.1669	56.4676	55.7303	7.50512	7.40397	0.00793597	3.57027
FBgn0027521	CG3679	106.61	108.464	94.1052	23.37	34.7772	58.0265	90.7961	94.4335	12.0349	15.6375	0.0019719	3.54479
FBgn0033692	wash	160.219	153.613	130.978	38.9877	44.9132	59.4646	60.3011	60.5686	15.3433	16.8736	0.00277476	3.53441
FBgn0260817	gkt	163.549	150.46	156.027	43.3371	45.6893	60.607	54.1088	60.5277	7.24821	9.6884	0.000190934	3.51983
FBgn0011703	RnrL	1207.61	1356.16	1296.79	356.745	390.642	381.696	417.921	418.887	55.7621	55.5334	0.000533023	3.44361
FBgn0034187	CG6967	85.4597	94.2378	76.4607	22.7573	26.8577	39.785	52.3276	56.324	7.34163	7.60774	0.00298225	3.44194
FBgn0039465	Tsp97E	297.437	243.603	268.837	66.8318	90.9249	54.7888	80.0093	75.29	15.8953	15.8097	0.00320855	3.42247
FBgn0086442	mib2	139.968	125.81	149.27	40.0758	41.1654	55.3967	58.8404	58.6523	8.05493	9.4517	0.00157189	3.40589
FBgn0038118	timeout	89.7771	117.287	96.9304	26.6132	32.9425	44.8569	46.123	47.1916	5.41138	5.74183	0.00718406	3.40292
FBgn0032197	ova	34.559	42.0914	37.6743	11.9599	10.4426	66.2217	82.4842	83.4168	27.416	17.5242	0.00258934	3.40213
FBgn0035918	Cdc6	80.1265	101.104	84.3091	27.3925	25.3375	61.388	69.7468	71.4653	7.10847	10.1535	0.00495247	3.35722
FBgn0286788	Orc1	81.0683	103.666	85.6507	29.1893	24.7575	74.7849	93.5516	99.0322	7.29769	8.15763	0.00605046	3.34138
FBgn0033990	CG10265	81.0917	83.3117	101.402	25.4652	28.0524	31.6671	44.4246	43.9301	14.8632	10.6693	0.00510834	3.31113
FBgn0004380	Klp64D	17.6941	15.268	16.358	3.15883	6.82314	17.1721	23.3229	25.5758	2.48571	2.65242	0.00601847	3.29395
FBgn0013763	Idgf6	1414.05	1393.77	1565.98	438.067	450.853	527.654	508.099	503.75	132.249	144.507	0.000723937	3.28023
FBgn0052296	Mrtf	54.9114	54.2065	66.6518	15.0195	20.887	17.4213	21.998	22.4686	1.24511	1.33615	0.00554132	3.26347
FBgn0037468	CG1943	2510.09	2705.33	2245.65	558.663	972.308	587.062	718.099	730.696	163.494	146.802	0.00499798	3.24895
FBgn0014417	CG13397	125.825	124.488	117.7	44.7157	31.4736	48.299	57.714	53.5825	9.58493	6.43367	0.000738568	3.22016
FBgn0025185	az2	32.7694	30.4363	39.1232	9.40178	12.0089	36.1654	41.3032	42.5118	4.06349	5.09274	0.0067608	3.18623
FBgn0039338	XNP	121.4	109.957	118.377	32.9912	40.6156	86.047	102.352	102.56	11.6372	14.4113	0.000620481	3.16759
FBgn0035761	RhoGEF4	79.051	90.6464	90.032	31.5877	23.3503	54.5835	60.7322	55.6061	10.0957	8.97797	0.00196409	3.15178
FBgn0010825	Gug	84.1197	95.5652	88.787	22.6102	34.203	37.2194	39.5655	40.5398	3.96039	4.646	0.00210786	3.15035
FBgn0026317	Tsc1	39.7854	51.1487	48.7478	12.3577	17.2046	24.1572	29.6645	28.4895	10.6476	14.3412	0.00708265	3.15
FBgn0022213	Cse1	752.214	762.796	701.305	237.422	232.093	259.822	279.065	275.195	42.5118	35.3237	0.000253761	3.14695
FBgn0250850	rig	224.54	280.048	237.536	75.9147	81.8085	159.099	182.528	179.34	16.0059	17.3289	0.00447243	3.13682
FBgn0003575	su(sable)	74.6463	82.1305	94.4436	21.8703	31.7554	29.5079	34.4984	34.5579	4.59813	6.44534	0.00637131	3.12314
FBgn0034728	rad50	40.5418	48.9595	38.5528	11.3888	16.1103	44.3034	50.2857	52.6884	6.78712	4.3235	0.00751915	3.10444
FBgn0036354	Poc1	141.397	154.548	184.347	46.425	56.9934	81.9975	82.6107	88.5792	6.56941	10.4733	0.0076412	3.09611
FBgn0004598	Fur2	116.351	117.106	123.997	41.6178	35.5755	82.0861	94.4005	94.7615	17.1851	18.7226	0.000241451	3.08709
FBgn0036052	CG10809	95.8705	84.2626	75.1804	22.2809	33.1521	28.1441	37.0163	33.6524	6.74281	10.3704	0.00715511	3.07054
FBgn0051961	TBCC	182.833	186.56	181.546	52.1422	67.7999	58.3538	61.3544	59.0016	20.4266	14.0233	0.000268728	3.06225
FBgn0037794	CG6254	21.948	23.6146	24.1807	5.73258	9.47817	17.6274	24.9242	25.7964	8.44039	7.65255	0.00245418	3.05676
FBgn0035911	CG6638	119.533	110.751	138.495	35.625	45.4693	69.8662	85.6653	77.6305	25.9465	31.1255	0.00517791	3.03169
FBgn0033258	CG8712	82.5295	107.014	87.4341	33.2345	27.8626	32.6528	41.5443	44.8836	9.79541	8.73288	0.00820912	3.02227
FBgn0262114	RanBPM	150.827	153.627	159.166	50.279	52.7983	83.0919	80.7403	86.3543	14.612	18.0108	7.22369e-05	2.99853
FBgn0017577	Mcm5	555.328	568.767	502.004	194.702	167.962	213.109	238.224	235.645	29.4444	29.8715	0.00102495	2.98918
FBgn0039293	Alg9	139.913	161.49	148.353	50.4329	49.9681	66.4543	76.888	74.388	19.3105	13.8209	0.00115725	2.9864
FBgn0035033	CG3548	77.1365	83.5709	95.5369	27.7276	29.482	44.2672	48.8535	48.8318	8.47366	9.44105	0.00389542	2.98603
FBgn0264493	rdx	205.293	212.631	212.942	63.444	77.8845	366.237	480.889	300.183	131.022	86.2853	0.000198732	2.97589
FBgn0032705	Grip71	177.707	153.107	149.165	47.4978	60.2242	70.1882	89.57	91.5201	18.2615	18.6212	0.00340369	2.97048
FBgn0263855	BubR1	114.913	111.03	118.872	38.7582	39.3466	56.6827	68.8952	71.3245	4.78014	3.71166	0.000126362	2.94319
FBgn0032374	CG14931	365.288	392.463	390.487	125.076	135.143	132.188	124.481	119.938	52.5551	42.1669	0.000228646	2.94173
FBgn0001226	Hsp27	17532.9	17002.1	20107.5	5376.27	7161.81	1279.19	1561.88	1605.78	487.742	529.446	0.00342137	2.90542
FBgn0035150	Rev1	62.516	54.7426	48.7561	18.159	20.2828	29.5611	32.3193	32.0969	6.46393	6.62092	0.00613116	2.87907
FBgn0024833	AP-1mu	154.256	156.379	148.993	53.4919	53.0924	89.65	111.369	114.03	42.7139	43.8789	5.04037e-05	2.8749
FBgn0031314	IntS14	171.405	162.607	158.203	54.1331	61.3974	58.4123	62.3355	63.6231	11.2106	13.3089	0.000335559	2.84032
FBgn0037376	Hat1	453.365	410.12	407.162	141.804	157.153	144.658	164.967	168.381	39.3577	27.9311	0.000854422	2.83351
FBgn0033526	Caf1-105	109.882	101.567	94.0326	38.3068	33.637	74.5419	89.7229	95.4001	13.1381	13.0773	0.00174967	2.83075
FBgn0039559	NSD	110.287	119.759	100.82	37.2394	41.8668	123.892	145.414	146.629	11.2999	12.4409	0.00230206	2.78837
FBgn0286778	CG46385	653.329	593.773	669.486	213.96	248.427	232.587	266.643	270.443	5.2032	0.029215	0.0010803	2.76332
FBgn0025781	Cdc16	177.018	189.547	198.593	64.6751	73.2734	52.2195	59.8737	59.988	13.4332	14.433	0.000833406	2.73125
FBgn0010355	Taf1	81.1972	95.7042	89.9819	26.5707	40.1925	40.6308	46.322	45.2222	4.75838	5.01916	0.00497774	2.66497
FBgn0011260	Sema2a	212.038	268.23	210.683	85.2022	87.8476	69.1281	88.4459	93.2224	10.4961	16.6522	0.00986361	2.66186
FBgn0010762	simj	61.0709	67.348	62.4483	24.4516	23.4884	38.7241	46.5144	46.5341	5.58136	9.2075	0.000535282	2.65425
FBgn0051852	Tap42	390.648	402.816	360.584	148.949	147.178	120.428	107.279	103.85	34.4093	36.7125	0.000698068	2.59809
FBgn0038686	CG5555	148.082	156.048	165.339	51.9145	71.5082	77.9194	90.1089	84.9265	17.6956	17.3837	0.00230164	2.53583
FBgn0031875	CG3430	240.542	245.057	231.655	102.172	89.5916	94.4399	98.8684	100.252	21.7138	20.5423	0.000246204	2.49353
FBgn0020633	Mcm7	394.706	371.965	389.046	168.939	142.054	181.304	194.111	199.336	29.9317	40.4097	0.000427604	2.47748
FBgn0003165	pum	79.5624	81.5336	76.2257	25.905	37.9808	49.3734	49.5935	52.348	3.45642	5.31626	0.00241542	2.47652
FBgn0266000	CG44774	87.5381	87.8419	96.8837	39.9109	34.227	94.3871	110.797	114.603	22.0142	19.1172	0.00125767	2.44826
FBgn0032479	CG16974	141.266	157.919	158.484	60.2014	65.3405	158.722	175.284	166.724	36.8584	28.7269	0.00127278	2.43037
FBgn0040752	Prosap	105.997	110.215	127.133	46.5725	48.2588	67.9005	72.6594	72.1282	1.6932	4.52587	0.00405116	2.41372
FBgn0086908	egg	86.1665	98.5271	96.9317	38.2272	41.0298	50.7061	51.2035	53.6896	8.37819	11.2585	0.00179533	2.36888
FBgn0002887	mus201	31.7304	35.1818	28.7629	11.3642	15.7978	25.8778	28.6891	29.3096	4.66365	3.50432	0.00810126	2.34826
FBgn0284257	Ttd14	275.663	280.571	268.658	117.695	117.702	129.474	122.559	130.334	53.1137	61.2131	5.02521e-05	2.33617
FBgn0004509	Fur1	65.2308	68.852	75.9103	25.4181	35.2365	40.9925	37.8499	39.7072	5.48146	8.47856	0.00537105	2.30807
FBgn0038390	Rbf2	79.7466	91.7959	71.2102	34.1964	36.4099	48.245	54.6373	54.9445	5.91365	5.3495	0.00979841	2.29207
FBgn0038968	CG12499	186.795	195.408	167.631	63.3586	96.5897	122.604	136.73	138.473	13.2186	16.151	0.00794485	2.29172
FBgn0029094	asf1	763.162	701.97	751.004	268.36	380.504	222.79	219.492	229.538	86.7263	74.9898	0.00332445	2.27694
FBgn0010877	l(3)05822	221.356	214.736	214.853	89.6559	101.103	88.7423	95.124	93.1848	13.1066	17.0352	0.000163198	2.27493
FBgn0015371	chn	76.4592	66.2322	67.628	29.2619	32.9029	57.1067	70.1837	69.5254	5.19515	3.53441	0.00292423	2.25551
FBgn0037746	CG8478	76.9165	81.5966	66.1922	28.5861	38.3132	62.5997	80.5342	66.325	7.16537	7.6332	0.00928917	2.23924
FBgn0015544	spag	219.4	247.126	222.036	100.752	105.323	69.868	81.5224	79.6742	24.3368	20.8406	0.00162314	2.22755
FBgn0027592	MED15	102.445	115.968	95.9589	46.0983	48.0968	41.2649	54.0718	55.1686	12.0179	13.9029	0.00482509	2.22497
FBgn0039632	Cul5	59.6922	52.3029	58.2974	26.7621	24.2832	35.341	39.6895	40.2395	11.1284	12.1621	0.00201948	2.22407
FBgn0023094	cyc	117.372	99.1471	93.7971	45.864	47.7981	167.005	175.661	185.074	32.4074	32.0836	0.00874513	2.20877
FBgn0036180	Duba	170.271	168.257	162.722	73.8024	79.6084	63.3057	84.8981	70.1837	10.5178	10.9508	0.00014196	2.17825
FBgn0001248	Idh	1392.04	1262.88	1550.31	637.721	649.747	413.9	459.125	448.464	144.123	142.767	0.00584655	2.17752
FBgn0032524	Hacd2	119.883	133.712	107	51.7474	58.8076	81.4004	72.3198	72.2327	22.9862	28.994	0.00806638	2.17445
FBgn0014340	mof	100.117	99.1986	104.746	40.9998	52.3914	49.9832	60.512	61.4451	4.09327	5.62616	0.00144346	2.17052
FBgn0035766	eco	70.1219	70.4078	66.9458	33.5267	30.2086	87.5493	98.7853	104.168	17.0231	17.8881	0.000285467	2.17018
FBgn0030093	Bap111	268.056	294.87	286.479	120.713	140.984	101.859	113.869	118.533	20.6364	28.7888	0.00125117	2.16384
FBgn0035811	Mcad	1947.95	1657.08	1986.46	935.668	809.319	407.609	411.747	409.328	103.226	93.8183	0.00606227	2.13621
FBgn0263667	Lpt	31.9196	30.5743	26.3957	12.4285	15.5998	21.0558	24.4904	25.3691	5.23599	4.71994	0.00782502	2.11428
FBgn0033755	ClC-b	76.7148	90.0166	93.5724	39.6642	42.4817	30.0861	34.9839	36.2085	13.0947	11.2977	0.00646481	2.11253
FBgn0250848	26-29-p	6705.71	6475.78	7414.35	3487.84	3053.77	1828.28	2013.17	1966.12	525.094	562.271	0.00288577	2.09896
FBgn0039141	spas	28.2875	25.4216	23.0961	13.317	11.0849	23.3352	29.3191	31.2816	9.32658	7.6268	0.00788823	2.09834
FBgn0026679	IntS4	69.1411	73.4186	74.1402	32.7085	36.7826	52.2867	49.7428	52.2639	7.59199	9.70783	0.000660883	2.07892
FBgn0010356	Taf5	115.564	120.479	109.645	48.5142	62.6845	45.2424	51.2659	49.517	7.5078	10.2534	0.00292841	2.0725
FBgn0011762	DNApol-alpha50	117.315	130.951	123.369	60.0034	61.426	45.0045	40.9991	47.8957	12.9352	13.0081	0.00114728	2.04034
FBgn0004381	Klp68D	10.2742	11.6696	12.3299	5.11363	6.18492	17.7661	25.4718	27.6928	3.87376	5.23647	0.00715497	2.02231
FBgn0013718	nuf	45.6087	47.6612	50.8954	21.2277	26.453	34.0991	43.5099	49.6503	14.4634	13.2835	0.00319128	2.01571
FBgn0262743	Fs(2)Ket	739.826	756.37	752.792	342.474	405.402	290.42	325.818	315.95	48.4427	31.7005	0.000590086	2.00478
FBgn0027526	Ublcp1	202.936	183.92	212.873	89.5366	110.615	107.301	104.315	113.898	26.7961	25.3482	0.00510188	1.99758
FBgn0031886	Nuf2	94.0364	100.379	116.568	51.3225	53.8184	87.6114	83.4837	89.0288	26.3435	15.5771	0.00988161	1.97185
FBgn0001612	Grip91	111.953	111.845	130.503	60.7552	59.3074	55.443	63.3346	59.2971	10.5313	10.876	0.00544231	1.96731
FBgn0032864	CG2493	523.513	493.968	598.927	277.458	271.892	114.008	140.001	132.42	43.6677	47.3407	0.007271	1.9616
FBgn0002878	mus101	58.1754	62.5509	61.8336	28.9007	33.1768	43.4995	50.2772	49.7515	2.19037	3.02023	0.00107795	1.96056
FBgn0263236	SP1029	208.436	230.174	232.431	127.314	102.37	75.466	80.7015	80.1597	15.8647	20.2666	0.00404035	1.94772
FBgn0039379	CG5886	137.257	143.501	154.862	65.0404	84.0715	49.945	60.3415	60.4865	18.0175	18.9074	0.00538055	1.94762
FBgn0037215	beta-Man	156.27	137.503	131.84	80.6933	65.1694	96.4652	93.2511	93.515	21.5396	22.1706	0.00851884	1.94527
FBgn0051251	CG31251	36.3724	37.1816	32.3646	19.5291	16.8818	18.7518	23.5437	23.0511	9.02125	6.52337	0.00420672	1.93932
FBgn0034181	CG8963	423.694	467.308	501.929	228.021	252.239	109.979	132.548	136.392	36.3746	44.3813	0.00524498	1.93358
FBgn0011725	twin	263.158	315.775	305.554	144.475	162.697	149.754	177.331	176.594	22.8638	30.9593	0.00753663	1.91964
FBgn0085423	GramD1B	48.7001	55.8839	50.1177	24.3157	30.0389	31.332	36.2337	38.1544	3.98517	3.87843	0.00630765	1.89743
FBgn0286809	xmas	32.6473	33.4531	36.3619	15.6059	20.5545	29.941	35.5705	39.3757	2.79454	0.785608	0.00639528	1.88903
FBgn0010173	RpA-70	721.118	707.465	611.044	378.175	342.689	210.981	258.127	257.022	59.5191	56.4283	0.00636908	1.88628
FBgn0035249	CG17249	76.7953	75.3181	84.4831	39.6471	44.656	19.0635	19.1363	20.203	9.00621	12.3973	0.00297107	1.871
FBgn0035726	CG9953	1662.91	1740.62	1529.87	856.95	906.586	363.045	385.999	378.421	161.754	158.877	0.00258982	1.86496
FBgn0034403	CG18190	1035.47	1017.99	870.156	547.965	498.402	338.078	348.2	361.313	192.763	123.094	0.0076166	1.86271
FBgn0023513	CG14803	65.9444	70.1076	71.7453	36.7875	37.7227	55.7139	58.6592	59.1407	6.39516	7.5241	0.000758574	1.85923
FBgn0027537	Nup93-1	174.98	169.1	182.358	92.8909	96.9653	126.148	142.773	146.855	20.6678	26.0536	0.00057746	1.84855
FBgn0015929	dpa	308.762	310.624	321.751	189.365	157.615	203.627	223.286	217.321	33.0631	39.8265	0.00168097	1.80824
FBgn0010660	Nup214	169.237	180.936	160.266	87.947	108.381	69.4313	84.4484	84.1907	10.3345	12.7963	0.0069732	1.73328
FBgn0030351	CG1840	256.136	255.873	249.423	127.215	165.973	4.70673	8.26377	11.1994	24.3116	21.6268	0.00534184	1.73139
FBgn0036299	Tsf2	77.9226	67.6928	66.5496	39.1901	43.9335	54.3726	54.9754	52.4038	9.68723	10.7362	0.00999345	1.7016
FBgn0039638	dgt6	165.022	186.389	177.02	101.395	107.411	88.0795	93.3603	91.2849	13.9672	17.8231	0.00324851	1.68715
FBgn0004913	Gnf1	189.222	207.47	221	122.028	123.514	114.432	129.926	138.009	26.0661	25.2914	0.00602101	1.67709
FBgn0005696	DNApol-alpha73	147.107	126.532	138.736	85.8661	78.8946	87.8571	106.332	105.078	14.9367	17.6329	0.00659136	1.66858
FBgn0001308	Khc	350.18	330.66	371.463	197.556	224.767	124.326	142.024	149.597	21.8945	33.8826	0.00466236	1.66113
FBgn0010097	gammaTub37C	839.942	810.628	790.669	484.225	498.472	240.683	253.773	243.468	61.9164	69.8792	0.000461397	1.65615
FBgn0036893	PIG-F	201.673	184.972	213.148	123.114	121.697	33.6633	42.5936	44.5278	18.5388	17.0674	0.00524216	1.63335
FBgn0037109	MED1	62.8717	64.5932	63.2115	33.5987	44.2675	49.5508	53.6198	56.6906	13.1614	12.3659	0.0088303	1.63251
FBgn0033901	O-fut1	192.466	211.491	197.6	121.577	127.831	106.074	114.78	113.135	32.7004	40.9237	0.00222533	1.60796
FBgn0027588	GCS2alpha	766.97	708.285	778.435	508.759	433.592	254.959	266.38	254.053	85.5434	99.0327	0.00583056	1.59437
FBgn0033812	Pex13	117.417	122.796	127.003	86.0543	75.3917	34.3417	49.2354	49.4713	21.4209	23.6167	0.00439917	1.51637
FBgn0262937	Rabex-5	41.7708	45.1257	43.4399	28.2232	30.4086	27.4045	28.9323	27.7281	7.83369	8.8931	0.00249674	1.48197
FBgn0014861	Mcm2	373.541	362.978	406.872	271.034	246.814	217.833	214.01	208.53	32.3486	30.1052	0.00798213	1.47198
FBgn0016696	Pitslre	110.266	120.341	118.311	73.4586	85.0392	78.3214	94.2713	98.5453	16.6381	25.6251	0.00801442	1.46761
FBgn0041171	ago	133.423	132.483	138.832	97.9726	91.9432	137.883	154.705	156.176	17.3804	20.8343	0.0013262	1.42076
FBgn0025335	Cpes	51.6351	55.5598	53.5152	35.9447	39.7442	54.4976	62.3437	64.1629	26.1116	32.6396	0.00451257	1.41553
FBgn0265574	Cdc5	150.392	154.088	158.385	102.451	119.289	69.1313	68.9443	69.5702	14.3984	15.2078	0.00826698	1.39161
FBgn0037481	MAGE	199.839	184.264	191.472	140.924	135.309	56.5178	56.5552	56.0959	25.1038	24.4367	0.00319342	1.3891
FBgn0037624	CG8223	781.39	778.254	814.954	584.173	589.861	174.328	197.47	203.271	77.0872	87.6663	0.000906982	1.3484
