# Supplementary material for: Prolonged ovarian storage of mature Drosophila oocytes dramatically increases meiotic spindle instability
Source: eLife. 2019 Nov 22;8:e49455. doi: 10.7554/eLife.49455 (PMC6905857; doi:10.7554/eLife.49455)
Supplement: Supplementary file 4. [file elife-49455-supp4.xlsx]

## Sheet: Sheet1
	Table S4	Counts of total reads mapping to Dmel and Dpse for ribosome profiling and mRNA-sequencing experiments.
	Sample	Reads Mapping to Dmel	Reads Mapping to Dpse
	2day_A_Ribo-seq	1207574	512247
	2day_B_Ribo-seq	1886585	824974
	2day_C_Ribo-seq	938553	338103
	8day_A_Ribos-seq	816424	483383
	8day_B_Ribos-seq	961823	708618
	8day_C_Ribos-seq	1991374	1458694
	12 day_A_Ribo-seq	669410	614369
	12 day_B_Ribo-seq	789265	735738
	12 day_C_Ribo-seq	620035	617324
	embryo_A_Ribo-seq	6431522	211366
	embryo_B_Ribo-seq	12337262	369489
	embryo_C_Ribo-seq	3343550	94626
	2day_A_mRNA-seq	2295191	573361
	2day_B_mRNA-seq	10091443	3598350
	2day_C_mRNA-seq	10339423	3454014
	8day_A_mRNA-seq	4733062	1456503
	8day_B_mRNA-seq	10382584	3151261
	8day_C_mRNA-seq	5558468	1915436
	12 day_A_mRNA-seq	4729757	1375675
	12 day_B_mRNA-seq	9176617	3619448
	12 day_C_mRNA-seq	10565792	3792462
	embryo_A_mRNA-seq	11504631	602071
	embryo_B_mRNA-seq	12647103	840852
	embryo_C_mRNA-seq	20013034	1504466
