# Supplementary figures and images for: Prolonged ovarian storage of mature Drosophila oocytes dramatically increases meiotic spindle instability
Source: eLife journal article supplement (doi:10.7554/elife.49455), 2019-11-22

Figure 4-figure supplement 2

**A**

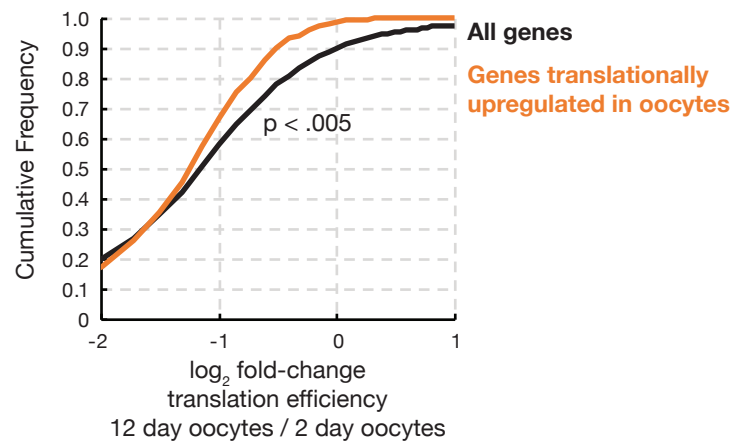

**B**

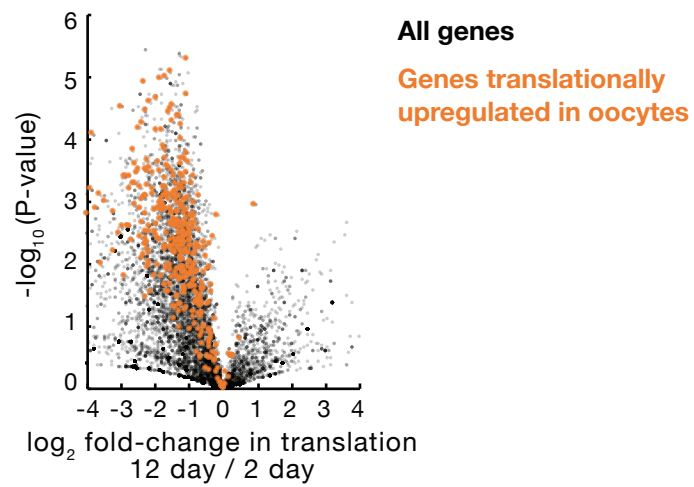

Supplement: supp [file elife-49455-supp-v1.zip]
